# Supplementary material for: Multi-Tissue Omics Analyses Reveal Molecular Regulatory Networks for Puberty in Composite Beef Cattle
Source: PLoS One. 2014 Jul 21;9(7):e102551. doi: 10.1371/journal.pone.0102551 (PMC4105537; doi:10.1371/journal.pone.0102551)
Supplement: Table S1 — The 2,450 genes and their average expression level (log2) involved in network analyses. These genes were differentially expressed (DE), tissue specific (TS), a transcription factor (TF) and (or) contained a SNP detected with GWAS in PRE and POST heifers. (XLSX) [file pone.0102551.s001.xlsx]

## Sheet: jj5
			List of 2,450 genes included in the network analyses with their average expression (Log2) across the 8 tissues in the Pre-Puberty and Post-Puberty samples.
DE = yes/no (1/0) the gene is Differentially Expressed
TS = yes/no (1/0) the gene is Tissue Specific
TF = yes/no (1/0) the gene is a Transcription Factor
SNP = yes/no (1/0) the gene contains a SNP associated with heifer fertility
TAG Identifier	Gene Symbol	DE	TS	TF	SNP	Endometrium		Fat		Hypothalamus		Liver		Muscle		Ovaries		Pituitary		Uterus
						Pre-Puberty	Post-Puberty	Pre-Puberty	Post-Puberty	Pre-Puberty	Post-Puberty	Pre-Puberty	Post-Puberty	Pre-Puberty	Post-Puberty	Pre-Puberty	Post-Puberty	Pre-Puberty	Post-Puberty	Pre-Puberty	Post-Puberty
ENSBTAG00000000008	KCNJ1	1	0	0	0	4.99322	0.986115	5.18441	5.2681	3.55657	3.59194	0.299085	0.639303	2.28999	1.58397	5.70687	5.61455	8.64024	8.02075	4.21411	2.34595
ENSBTAG00000000033	PHOSPHO1	0	1	0	0	2.12439	0.827245	3.39008	3.13505	4.17914	3.99561	4.27158	3.9298	8.2701	8.18428	2.29791	1.92223	2.47776	2.23555	1.90989	1.04191
ENSBTAG00000000040	MAFG	0	0	1	0	1.7385	2.09787	2.79811	2.70175	2.65909	2.7453	2.16714	2.0593	3.46347	3.45027	2.06112	2.07357	2.15758	2.19367	1.44394	1.55931
ENSBTAG00000000044	MYADML2	0	1	0	0	3.83403	4.00287	1.31906	0.573005	8.83942	8.98901	1.86525	1.71727	13.0191	13.0648	2.15063	1.39413	5.10066	5.23423	2.79134	1.53584
ENSBTAG00000000066	LRRN4	1	1	0	0	1.82037	0.226548	2.56101	2.12059	0.717185	1.70104	1.65166	1.30707	1.17628	1.66548	8.98049	8.69716	1.22541	2.33959	1.11119	5.15142
ENSBTAG00000000070	F13B	1	1	0	0	2.57881	2.94589	3.30413	5.9077	1.68483	1.92291	15.4659	15.5801	5.40926	4.25825	2.29025	4.19913	4.31124	2.81054	5.41566	5.36552
ENSBTAG00000000085	CYP1A2	1	1	0	0	5.13668	4.6267	4.01349	7.55978	2.56804	3.54429	17.1072	16.9774	7.18252	6.6648	3.33187	5.93343	5.45829	3.2603	7.29758	7.00122
ENSBTAG00000000088	ALCAM	0	0	0	1	2.14184	2.16413	1.19833	1.40321	4.16257	4.19396	3.83481	3.80097	2.56971	2.67653	2.77428	2.83845	3.35096	3.35615	2.05823	1.81938
ENSBTAG00000000098	SETDB1	0	0	1	0	3.45736	3.3687	3.0208	3.12317	2.65708	2.7117	2.48428	2.47026	2.84639	2.90257	3.35973	3.28609	2.66427	2.66641	3.41112	3.30504
ENSBTAG00000000109	NPTXR	1	0	0	0	7.96884	7.89807	5.9441	5.89371	11.8491	12.2009	1.82068	3.46007	5.70768	6.15282	8.28719	8.46077	8.43587	8.70155	7.92835	7.99382
ENSBTAG00000000128	FGF18	1	0	0	0	7.6825	7.48486	7.69198	7.60101	7.3652	6.95327	1.51751	0.0640488	7.99159	7.7965	7.02814	7.05602	5.58571	4.86391	6.93117	6.50555
ENSBTAG00000000145	OR13D1	0	1	0	0	0.750845	2.89448	4.71876	4.89731	0.79762	0.133651	0.346845	0.373321	1.5521	0.896146	0.0346	0.655438	1.87479	1.40388	1.19732	1.14143
ENSBTAG00000000158	LY6K	1	0	0	0	6.32289	4.04519	6.51056	4.94703	4.07444	1.96762	5.86933	3.32061	4.03053	3.41636	5.96538	5.55365	7.73538	6.91178	6.23721	4.77888
ENSBTAG00000000168	F1MUM6	1	0	0	0	1.34569	3.80268	1.80628	0.774471	0.239979	0.139566	0.805089	0.704676	4.98887	2.18168	2.07978	2.11456	0.325127	0.232301	3.93299	3.74559
ENSBTAG00000000170	GSTT4	1	0	0	0	6.97111	6.87605	7.6286	7.20843	4.69083	4.50473	10.3186	10.0926	3.4657	1.04706	9.52417	9.04999	6.33496	6.4221	7.62002	7.63164
ENSBTAG00000000198	LOC781146	1	1	0	0	11.8323	8.42168	1.68916	1.50436	0.378308	1.38022	1.61018	0.626436	0.977114	1.62372	6.51607	5.27552	6.19517	6.79101	10.9169	9.60604
ENSBTAG00000000228	F1N5W1	0	1	0	0	0.0648067	0.084145	0.268871	0.314701	5.89846	6.79542	0.638091	0.683921	0.839256	0.885086	0.376506	1.12417	1.42066	0.564926	0.0929862	0.138816
ENSBTAG00000000232	OR51D1	1	0	0	0	7.30985	4.52091	5.99712	4.88119	1.77152	0.0634975	2.24592	0.599548	10.132	9.79376	6.44595	6.30595	8.2564	7.64328	7.09145	6.8048
ENSBTAG00000000238	PSD2	1	0	0	0	7.14531	6.74597	2.15427	2.02707	13.0326	13.0571	1.59441	1.51635	1.86304	4.03958	5.04978	5.23165	6.4343	6.8067	6.12814	5.32685
ENSBTAG00000000257	MRAP2	1	0	0	0	9.47067	10.0397	4.63452	4.47863	9.61978	10.0391	1.17757	3.22208	5.06302	5.31558	7.70216	7.86046	8.76324	9.00004	10.3314	11.7606
ENSBTAG00000000259	CHIA	1	0	0	0	6.19078	5.8164	3.77703	6.61741	2.23749	2.83392	16.0709	16.3576	5.83045	3.56935	3.99382	5.02809	4.82273	2.84048	6.14168	5.84235
ENSBTAG00000000265	SYNPR	1	0	0	0	5.55373	3.89322	5.63775	5.03157	12.0311	11.8635	1.1602	2.72146	5.12472	4.6974	8.9327	8.85905	10.0041	10.1646	6.96094	7.39422
ENSBTAG00000000301	Q2NKZ8	1	0	0	0	6.69427	6.4904	3.47257	2.05629	3.72483	4.60276	5.37395	4.90935	0.857396	1.20224	3.87439	2.09739	6.6441	6.55537	6.00114	2.92479
ENSBTAG00000000310	MFAP5	0	1	0	0	14.4657	13.6781	17.8538	17.1707	7.39488	8.20951	8.14406	8.14606	14.8827	14.4592	12.6414	11.9056	10.0604	10.7735	14.7111	14.6223
ENSBTAG00000000344	SPACA3	1	1	0	0	1.83764	0.660573	0.296983	0.319352	2.50358	3.41389	8.71892	10.0144	0.867369	0.889737	0.0738075	0.0961775	0.191802	0.200352	1.4323	0.563512
ENSBTAG00000000374	LRRTM4	1	0	0	0	0.01027	0.0978633	5.98122	5.7683	11.4528	11.6049	0.815486	1.46067	1.6161	1.14055	4.45902	4.79857	9.24199	9.17493	0.961911	3.07424
ENSBTAG00000000381	S1PR4	1	0	0	0	5.45823	3.43068	6.56837	6.56437	2.70123	1.68033	6.93157	6.98982	2.53683	4.33597	6.17734	6.27362	1.77322	3.57749	3.86309	5.0867
ENSBTAG00000000385	ZNF238	0	0	1	0	3.66826	4.10719	2.70459	2.73887	3.31648	3.23392	2.20766	2.23332	5.58726	5.66102	2.49049	2.39394	2.21426	2.20791	3.48926	3.69567
ENSBTAG00000000397	CNPY1	1	0	0	0	0.134217	0.301155	0.741956	1.74076	6.05511	4.73912	1.1746	2.30797	2.60953	2.77168	1.37184	4.18047	0.197258	0.410916	0.173776	0.340306
ENSBTAG00000000399	NANOS3	1	0	0	0	5.04966	7.15029	2.42671	3.94581	7.99785	8.27042	0.141127	1.40909	1.63904	2.82876	4.13683	5.59578	6.7088	7.40248	7.23286	7.82378
ENSBTAG00000000400	KRT85	0	1	0	0	0.043695	0.0295283	0.267481	0.245912	0.321871	0.831292	0.636701	0.615133	0.837866	0.816298	6.91104	6.57024	1.14973	0.414002	0.0915962	0.0700275
ENSBTAG00000000401	TTC24	0	1	0	0	1.8374	1.5325	1.43133	0.518706	6.57241	7.68767	0.21078	0.378641	1.20294	3.04895	5.43474	6.57346	12.664	12.71	1.14606	2.09252
ENSBTAG00000000414	FUT5	1	0	0	0	10.408	10.0555	1.99516	1.4895	2.85034	2.7401	4.19879	4.16875	0.27432	1.30789	7.27082	6.64232	5.48163	5.22681	8.62736	7.15001
ENSBTAG00000000437	O3FAR1	0	1	0	0	7.57163	7.65527	11.715	11.6579	5.53003	5.49141	2.23542	0.68749	4.31304	3.19223	4.8779	4.1454	10.1461	9.57709	6.14556	4.279
ENSBTAG00000000438	GNRHR	0	1	0	0	1.60448	2.96837	2.45279	1.1213	1.75091	1.87798	3.13022	3.63721	4.68625	3.45752	7.50705	8.67463	15.0532	14.4848	2.05035	1.75377
ENSBTAG00000000440	HSPB2	0	1	0	0	3.32996	2.35457	3.29131	3.1082	4.42794	4.24507	1.82759	1.67582	8.18586	8.15462	3.1562	2.75431	0.704182	0.942646	4.31248	4.24325
ENSBTAG00000000456	CPB1	1	0	0	0	1.01345	0.378312	4.49927	5.03998	3.09174	5.34444	0.487861	1.41541	2.26924	3.2923	4.76703	6.20896	0.52886	2.51326	1.88356	3.69046
ENSBTAG00000000470	IBSP	1	1	0	0	2.45498	3.00089	0.195031	1.31314	2.62599	3.74347	0.568296	1.69499	0.449756	0.898174	6.08742	9.48363	3.09634	4.23994	3.30846	5.93313
ENSBTAG00000000478	C3orf45	1	0	0	0	8.04905	7.83131	8.90741	9.03423	4.37851	3.28115	5.10109	5.03252	11.4148	11.1152	3.27201	0.237371	5.34499	4.16862	8.21065	7.83139
ENSBTAG00000000502	DAZL	1	1	0	0	2.52406	5.29226	1.2851	2.01091	0.728508	0.475231	5.50898	5.30404	1.67738	1.91074	8.29396	8.46559	0.0666483	0.310631	2.64678	5.9536
ENSBTAG00000000521	PLEKHA8	0	0	0	1	1.65773	1.86391	1.31482	1.34602	0.784741	0.758827	0.985617	0.924522	0.484693	0.618939	1.80968	1.81713	1.74029	1.69815	1.69918	1.4426
ENSBTAG00000000522	AHSG	1	0	0	0	7.63652	6.84504	8.03287	10.7097	11.5097	11.9517	20.2029	20.25	9.92145	8.87585	8.85633	9.64334	9.30169	8.62778	9.8407	9.62832
ENSBTAG00000000527	ZFAND3	0	0	0	1	4.88794	4.88472	6.16276	6.13786	5.21753	5.32958	4.54577	4.56157	6.69376	6.73367	5.34065	5.26537	4.80701	4.80953	4.94604	5.08937
ENSBTAG00000000531	F1MR88	1	1	0	0	2.91718	4.88627	1.09555	0.685054	3.93492	3.03907	3.35379	3.31218	2.15727	2.15943	0.064545	0.203089	0.164178	0.309294	4.18591	7.28637
ENSBTAG00000000569	HES1	0	0	1	0	2.3616	2.05826	2.79991	2.84835	1.47725	1.69897	1.18936	1.18059	3.11516	3.22791	2.0632	2.0403	2.96791	2.74395	2.18438	1.67599
ENSBTAG00000000580	LY6G6F	1	0	0	0	5.35906	6.2518	2.53385	2.73048	5.13972	5.61143	1.56878	0.715938	1.19038	1.5789	2.95838	0.946215	4.58287	4.86878	4.95655	4.56471
ENSBTAG00000000582	LY6G6E	1	0	0	0	8.60569	12.3805	6.70183	5.46494	9.70144	9.98971	3.05957	2.87554	4.54967	3.1481	5.26016	2.16726	2.51118	2.2757	5.56061	6.8012
ENSBTAG00000000585	LY6G6C	1	1	0	0	8.46368	13.5399	5.11351	4.6956	6.15557	6.52796	0.8591	2.31339	1.64467	3.87264	3.0157	2.73598	0.32903	4.21256	5.16296	7.89553
ENSBTAG00000000589	CACNG4	1	0	0	0	7.66514	8.76282	3.40421	4.70591	11.2585	11.426	4.51549	6.13087	9.0642	9.10927	6.38796	6.51536	8.30474	8.49366	6.98112	6.218
ENSBTAG00000000593	ST8SIA1	1	0	0	0	4.72542	4.387	3.71188	2.01894	9.28654	9.18932	4.47832	4.40271	5.41277	5.06086	4.66948	4.4883	5.63105	5.3147	4.51859	3.78733
ENSBTAG00000000606	SYT10	1	0	0	0	3.19056	1.93009	0.937957	0.108411	10.311	9.97407	0.578174	0.980095	1.37068	0.634696	1.97469	2.80114	10.7245	10.3054	3.62799	1.6264
ENSBTAG00000000644	S100A5	0	1	0	0	5.91775	6.36989	9.66723	9.49632	1.18712	1.15709	0.163379	0.131414	3.04552	2.21626	4.42469	4.59218	0.51259	2.11419	4.24253	2.5213
ENSBTAG00000000665	HCRT	1	0	0	0	4.82575	4.1509	6.87326	6.98629	8.46118	12.1212	2.33583	3.62044	3.22126	2.63548	3.88764	5.04611	1.46636	3.00566	3.49283	3.50968
ENSBTAG00000000690	THEM5	1	1	0	0	4.59654	1.24601	3.61856	4.607	0.919218	0.0901187	0.402402	0.308634	1.78854	0.889404	2.60194	0.610639	0.291155	0.908495	6.67385	9.15179
ENSBTAG00000000694	TAF10	0	0	1	0	8.78981	9.19435	9.37117	9.29287	9.19468	9.43274	9.34203	9.34734	9.23398	9.22279	9.19426	9.15726	8.99519	9.09389	8.64727	8.66105
ENSBTAG00000000698	MYO18B	0	1	0	0	2.54503	3.83044	3.05545	1.99904	4.8924	5.19003	2.90356	3.04305	14.1469	14.043	4.40459	4.01872	3.88589	3.81116	2.53085	2.11117
ENSBTAG00000000703	ST6GAL2	0	1	0	0	10.4419	8.1026	3.66967	2.89768	10.5308	10.349	0.731152	2.18455	3.45723	2.76167	7.84905	7.07144	6.20274	6.14563	11.644	10.7878
ENSBTAG00000000736	LRP8	0	0	0	1	3.78174	4.35261	1.73167	1.6533	5.49055	5.46249	0.255425	0.376179	1.31445	1.29643	6.09594	6.34189	5.15828	5.32315	3.00432	2.33152
ENSBTAG00000000743	MBOAT4	1	1	0	0	1.37313	0.664393	0.825063	2.3527	0.755802	2.5521	0.592472	0.843319	0.793637	1.04448	9.77272	10.0905	1.42712	4.23817	0.0473625	0.298209
ENSBTAG00000000809	IRX1	1	1	1	0	0.521622	2.40959	8.25085	8.55173	11.0329	11.3361	1.48639	1.73876	2.25956	2.97126	0.683895	2.99333	1.26004	4.20872	0.649566	0.364194
ENSBTAG00000000818	PLEKHG7	1	0	0	0	7.08603	7.24063	8.97228	8.7675	1.84668	2.20221	5.21742	4.02615	3.78151	2.72009	6.28033	5.24632	3.29527	0.793233	6.70287	6.72283
ENSBTAG00000000871	TRIM27	0	0	0	1	4.1443	4.06231	4.25397	3.99502	3.77117	3.86641	3.94634	3.75276	3.29584	3.13863	4.33363	4.23548	4.20341	4.22585	4.2454	4.14765
ENSBTAG00000000898	F2RL2	1	0	0	0	4.26168	4.12231	7.14747	6.73503	1.21106	1.02922	2.84917	2.65764	5.37195	5.5096	4.40425	4.5625	3.48427	1.78414	4.48557	2.84415
ENSBTAG00000000908	GPR81	0	1	0	0	6.50734	6.43785	13.3666	13.5295	6.28339	6.57159	0.903008	1.46763	6.62692	6.48523	6.13882	6.22175	6.95815	7.19643	4.02439	5.24796
ENSBTAG00000000910	SLC6A7	0	0	0	1	1.92339	3.26294	6.10451	5.31844	10.7901	11.0165	3.98709	3.74341	1.73131	2.73507	2.87523	2.19338	3.17337	2.95729	2.41977	2.1205
ENSBTAG00000000914	OPRK1	0	0	0	1	5.17127	6.86305	0.11021	0.313306	11.207	11.8148	1.03627	2.42077	1.88342	2.06244	1.20514	1.65233	6.3655	7.45238	7.09912	7.25359
ENSBTAG00000000916	TCTE3	1	0	0	0	2.2925	4.92245	4.25008	2.84136	4.35594	5.66749	1.79521	0.09931	1.08456	1.20144	7.33917	7.02044	6.43866	5.06996	3.65621	4.1178
ENSBTAG00000000948	RAB2A	0	0	0	1	10.468	10.5094	10.9798	10.8588	10.8064	10.9132	10.6433	10.5397	11.0527	11.1864	10.5373	10.588	11.4088	11.4561	10.6888	10.8084
ENSBTAG00000001000	CA13	1	0	0	0	5.26698	7.3505	4.97529	5.54829	7.35219	7.68251	9.70123	10.1106	3.42857	3.87361	6.04569	8.12632	1.36693	3.10474	5.21978	7.00331
ENSBTAG00000001001	ANKRD55	1	0	0	0	4.21416	3.95608	2.49031	3.75844	9.93838	10.3973	2.70279	4.10232	0.100085	1.92206	8.37095	8.84075	6.91946	6.96678	4.61284	5.06689
ENSBTAG00000001003	CKMT2	0	1	0	0	0.926477	1.31388	1.45147	0.752291	5.81895	5.96485	2.16379	2.26464	11.6949	11.6642	1.99518	1.97301	3.18219	3.15065	1.15154	1.21011
ENSBTAG00000001006	HMX3	1	0	1	0	0.0783183	0.193837	0.285635	0.421219	4.96433	7.70081	0.65485	0.790434	0.856015	0.991597	0.062455	0.198039	3.5039	3.27909	0.109745	0.245329
ENSBTAG00000001010	ADAMTS18	1	0	0	0	9.43093	6.55131	8.18254	8.48617	4.3036	5.19828	0.77398	0.686383	3.47813	2.04216	7.04641	7.31379	7.87087	7.16012	9.38731	6.35408
ENSBTAG00000001019	GDF10	1	0	0	0	7.71995	7.73716	6.7661	6.95689	10.1375	10.3805	6.3457	6.53195	3.63601	3.30395	6.23609	5.27216	1.55401	3.85876	7.98035	9.52794
ENSBTAG00000001020	AKAP3	1	0	0	0	3.73485	4.32713	3.2743	3.47827	4.92686	5.9448	1.44998	1.85042	0.760445	3.24174	3.60121	4.17353	5.47599	5.85506	4.59556	4.87549
ENSBTAG00000001026	BCMO1	1	0	0	0	3.52947	4.88611	1.37539	1.44525	5.7714	6.05451	1.39647	3.11374	0.729866	0.194784	5.70171	5.92873	3.9622	3.46342	1.89763	2.83466
ENSBTAG00000001032	PYGM	0	1	0	0	3.48172	4.17922	3.87366	2.71812	6.85414	6.91834	3.07692	2.91037	14.7666	14.746	4.38049	3.97055	4.78399	4.57024	4.16701	4.29206
ENSBTAG00000001034	IL18R1	1	0	0	0	6.80592	5.75215	8.54825	8.82536	2.53709	3.55932	6.21894	6.43161	6.62773	6.42295	5.7053	5.8019	1.93816	3.72283	7.06941	7.05863
ENSBTAG00000001035	SF1	0	0	1	0	10.5619	10.6331	10.862	10.7105	10.1562	10.1885	10.7744	10.6678	10.4133	10.3345	10.6176	10.4698	10.3671	10.3347	10.5343	10.5791
ENSBTAG00000001062	PTH2	1	1	0	0	0.0431617	0.181213	0.255465	0.41423	1.35482	4.26155	0.624685	0.78345	0.82585	0.984616	0.43994	1.46356	0.133843	0.28392	1.35208	0.64599
ENSBTAG00000001069	TP53	0	0	1	0	4.24839	4.11021	3.86648	3.69763	1.31888	1.57527	3.31582	3.31913	2.56549	2.66064	4.4324	4.2658	2.42939	2.50496	4.53921	4.22627
ENSBTAG00000001082	SH2D5	1	0	0	0	5.73474	3.66652	6.87429	5.94381	10.2993	9.82919	2.42033	3.87634	2.42209	0.07732	7.40816	7.15897	8.6434	8.41698	7.32791	5.01
ENSBTAG00000001085	FAM20A	1	0	0	0	1.59825	2.27151	2.90617	2.77459	3.12438	3.22179	5.93154	5.76638	0.712405	0.463534	2.30224	2.30572	2.1138	1.94044	2.04602	4.51576
ENSBTAG00000001088	SLC17A8	1	0	0	0	6.86599	5.92652	3.35577	2.14694	6.16653	6.33418	6.24271	6.23291	2.31	1.37403	5.00757	3.70852	9.12438	7.39444	5.68619	2.52874
ENSBTAG00000001099	C5H12ORF53	1	0	0	0	5.59247	5.16728	1.4288	1.72904	13.6888	14.1386	3.20003	3.58976	1.46484	3.66314	4.90977	5.42183	9.22469	9.53501	3.39644	4.43715
ENSBTAG00000001100	IL22RA1	1	0	0	1	5.44809	1.37952	1.57975	1.77782	1.18662	0.782742	4.10209	2.62859	1.29961	2.08571	7.44801	6.46293	0.385083	0.599386	5.6375	2.96815
ENSBTAG00000001120	CORO6	0	1	0	0	1.08797	1.46357	1.19275	1.5318	3.2553	3.25569	0.754684	0.549455	7.29022	7.39762	0.906895	1.20699	3.68004	3.7202	0.893601	1.40963
ENSBTAG00000001125	ADAMDEC1	0	1	0	0	10.9206	11.1135	4.59464	4.13661	2.57756	1.28882	6.30786	6.59769	4.81557	4.68729	13.2306	13.0423	5.55782	5.24518	9.95934	9.69178
ENSBTAG00000001128	RNF165	1	0	0	0	7.45992	6.4046	6.25032	6.44063	9.00014	9.10507	0.08688	2.04373	3.8973	4.91556	7.55366	7.43747	8.22775	8.31175	5.85798	4.99066
ENSBTAG00000001135	C1orf194	1	0	0	0	10.9981	10.6113	2.47755	3.20576	8.18089	9.0022	5.16015	4.56039	0.989966	0.865465	6.13438	4.91634	10.0151	9.91002	9.71619	6.70777
ENSBTAG00000001138	UFSP1	1	0	0	0	6.66441	6.76349	7.4607	7.13543	1.87208	1.70507	7.13585	7.24844	6.98117	5.92195	5.79181	5.13198	7.14536	5.21611	7.42651	7.06092
ENSBTAG00000001150	KCNE1	1	0	0	0	8.46884	4.66607	1.64532	1.01327	4.55242	2.85968	1.69301	0.419699	3.21421	1.97041	7.55618	6.37381	0.558918	0.734656	8.38074	3.12784
ENSBTAG00000001152	TLE6	0	0	1	0	2.6478	1.66986	1.2955	1.36853	3.31514	2.69311	1.47747	1.97209	1.23163	0.875345	3.10471	3.1105	2.17328	1.73571	2.41648	2.6623
ENSBTAG00000001154	DGAT2	0	1	0	0	2.59727	4.94537	8.86487	9.28852	2.10249	2.14686	4.1608	4.30916	4.14572	3.80259	0.94296	1.04223	0.856158	1.2666	1.145	1.59922
ENSBTAG00000001183	KLHL33	0	1	0	0	2.01286	1.29858	2.21518	2.55466	1.06925	1.361	0.398173	0.307964	8.66307	8.74971	1.61713	1.50365	1.5681	1.54916	2.99588	3.46174
ENSBTAG00000001191	CCL17	1	0	0	0	1.52486	2.1579	6.31831	4.47206	5.39651	3.06458	3.41743	1.60509	6.74784	6.70725	6.44538	6.27268	1.70029	2.96631	5.21763	4.10051
ENSBTAG00000001206	LCN15	0	1	0	0	8.32135	8.06471	0.998347	0.01914	11.1524	11.1603	1.31722	0.37223	0.402715	0.21599	2.47625	1.25254	2.08839	2.32249	8.87553	7.46619
ENSBTAG00000001221	NKX3-1	0	1	1	0	4.85768	7.93844	1.48165	0.337071	3.08768	4.33429	1.62027	2.48537	0.078035	0.275081	2.4628	2.82649	8.10654	8.06289	7.36031	8.43164
ENSBTAG00000001231	CDHR1	1	0	0	0	4.54316	3.50441	1.51375	2.391	10.4274	10.3256	1.11013	2.67603	1.07354	0.6635	3.73662	3.62195	2.84368	2.68745	3.73054	5.10536
ENSBTAG00000001241	ISL1	1	0	1	0	4.77427	2.27788	5.85123	3.29042	9.4568	10.0638	0.26532	0.0759225	3.31568	1.96561	2.41637	3.06787	11.1825	11.1456	6.90414	6.85311
ENSBTAG00000001247	LECT2	1	0	0	0	6.77699	6.19149	5.08262	8.11834	4.81447	5.34715	17.1535	17.5807	6.9251	5.41371	5.98961	7.22103	6.806	6.24105	6.93228	7.11497
ENSBTAG00000001252	HIVEP1	0	0	1	0	1.91501	2.3521	1.77605	1.91168	1.5253	1.71161	1.40637	1.36359	0.243257	0.300057	1.73262	1.76574	2.6174	2.65344	1.73072	1.96318
ENSBTAG00000001260	PINLYP	1	0	0	0	4.20138	1.62755	4.17045	4.2946	2.90395	3.41729	2.67655	2.48464	2.97304	1.68129	5.4659	4.41039	4.72382	4.23738	4.48862	2.9879
ENSBTAG00000001265	HRG	1	0	0	0	4.10123	3.9895	4.81617	7.77501	6.65066	6.5395	17.2425	17.2234	6.83274	6.33837	2.99517	5.69058	5.36838	3.0842	6.97485	6.7416
ENSBTAG00000001271	PLG	1	1	0	0	4.73986	4.51461	6.7852	9.06979	4.36516	5.2011	18.214	18.1846	7.96326	6.25648	6.63517	7.50036	6.48876	3.97938	7.95546	7.73729
ENSBTAG00000001290	TUBD1	0	0	0	1	1.685	1.94339	1.29049	1.5935	0.842566	0.872157	1.21485	1.30723	1.52538	1.57387	1.38778	1.51155	1.62124	1.83948	1.43861	1.62953
ENSBTAG00000001310	RHO	0	1	0	0	4.79603	4.11482	2.35976	2.87028	0.826211	1.04753	2.67185	3.01399	0.198972	0.30956	1.07237	1.43511	8.55337	8.92402	0.0663225	1.47874
ENSBTAG00000001315	DMRTA1	1	0	1	0	3.12038	3.64022	0.884519	0.608421	5.08458	4.52108	4.15435	1.94555	1.08792	0.386628	7.09659	6.77246	8.48623	8.48518	1.30296	1.57913
ENSBTAG00000001325	UPB1	1	0	0	0	5.57746	4.65918	3.05283	5.09083	3.30548	3.29524	13.9482	14.007	4.97918	4.39201	4.7022	4.50624	3.52201	3.59506	5.39087	4.4001
ENSBTAG00000001331	FAM194A	1	0	0	0	6.96352	6.84969	2.89963	3.07576	3.80365	5.06998	1.40079	0.086375	1.10017	1.5374	5.58901	4.78838	5.44027	5.32415	6.2787	4.08563
ENSBTAG00000001333	PPARG	0	1	1	0	3.36807	3.16004	9.60496	9.54279	0.890478	0.962486	2.55166	2.50274	4.44487	3.80801	6.51469	6.22401	1.42474	1.10696	2.70275	2.5545
ENSBTAG00000001338	CCR3	1	0	0	0	4.37277	2.26304	7.10281	7.50852	1.68773	1.89622	7.34615	7.8914	3.17481	4.95092	5.09626	5.06709	0.0457483	2.18309	5.87988	6.62125
ENSBTAG00000001344	LOC513822	1	1	0	0	3.56409	1.15986	4.23217	4.17721	2.9945	1.30197	3.93348	3.08332	12.1875	11.2487	2.09806	3.02819	3.9289	2.82748	1.78787	3.36562
ENSBTAG00000001357	PRMT1	1	0	1	0	4.1021	3.8296	4.04244	3.60289	4.44263	4.6273	5.0684	4.9588	2.38236	1.89888	4.05431	3.05743	1.26262	3.44223	3.93311	3.81919
ENSBTAG00000001388	NMB	1	0	0	0	4.49939	5.8102	4.20346	5.02968	2.79403	3.37171	0.612486	1.2686	2.38273	2.18883	7.65561	7.34476	2.429	2.76152	5.38746	8.76527
ENSBTAG00000001392	RDH16	1	0	0	0	8.54558	8.91529	6.98904	8.91293	3.49091	4.44139	15.4929	15.8011	5.90329	5.07201	4.8677	6.06798	6.84818	6.81904	6.9613	6.92048
ENSBTAG00000001404	CACNG3	0	1	0	0	0.114882	0.047035	0.617205	1.11945	12.4341	12.0986	1.53824	0.880677	0.90744	0.815322	1.92464	0.601843	1.56581	1.281	0.161165	0.0690475
ENSBTAG00000001406	MAB21L3	1	0	0	0	6.20961	6.21327	2.09906	2.50969	1.95154	4.307	10.5185	10.6038	0.1116	0.175969	1.64204	1.25253	3.16024	2.61539	3.66899	3.11203
ENSBTAG00000001412	N6AMT1	0	1	0	0	0.679107	0.319282	1.22207	1.02055	1.06922	0.920358	0.888362	0.739006	1.84103	1.85515	0.790384	0.62946	0.965863	1.03396	0.792506	0.672358
ENSBTAG00000001417	ACSM1	0	1	0	0	2.5392	2.62681	10.0896	10.2308	1.09914	1.56969	11.6459	11.607	4.76245	4.02074	3.79678	4.28078	1.57274	1.67881	2.15401	1.94877
ENSBTAG00000001448	INMT	1	1	0	0	0.335268	2.77157	2.01569	4.83523	0.118655	2.0893	14.3716	15.4126	4.8259	1.89761	2.16091	2.441	1.32877	1.70305	1.80163	3.64896
ENSBTAG00000001451	A4GNT	1	1	0	0	7.14129	2.18666	0.58659	0.286903	0.390695	0.0910075	0.955805	0.656118	1.15697	0.857283	0.363415	0.0637275	0.51268	0.179602	6.15996	3.99833
ENSBTAG00000001455	HOXA7	1	1	1	0	10.3147	9.91717	12.0396	12.0619	0.250655	2.60461	1.82413	0.461525	11.3996	11.5408	7.77888	7.08087	0.0566983	1.57103	10.4367	10.4548
ENSBTAG00000001488	OTC	1	1	0	0	3.14123	3.30198	3.40306	6.29317	1.75377	2.16949	15.3844	15.7785	5.2265	4.67408	0.572761	2.56842	3.46354	2.65387	5.14547	5.55041
ENSBTAG00000001503	TRIM72	1	1	0	0	2.44733	2.44904	3.50546	2.13848	2.22191	2.76032	2.1923	2.5321	14.3634	14.3586	2.86574	0.66525	2.61572	2.69279	1.46348	2.0141
ENSBTAG00000001516	CRSP1	1	0	0	0	1.5628	1.6399	0.138979	1.06317	11.185	12.7532	0.476029	1.33197	1.7273	1.87425	3.97523	2.73986	10.1429	9.81547	0.337494	2.05601
ENSBTAG00000001530	FGF8	1	0	0	0	0.607272	1.41585	3.30745	1.20152	6.36237	6.34519	0.80517	0.650855	3.47976	2.51053	0.212775	0.05846	4.07487	2.2451	0.57977	1.10374
ENSBTAG00000001545	SLC34A2	0	1	0	0	12.6049	14.5884	2.69193	1.85193	4.65003	5.70278	2.08564	3.09826	4.1145	4.69679	7.64637	8.12988	9.03594	9.26027	11.3243	11.6719
ENSBTAG00000001562	NFE2	0	0	1	0	4.78343	4.24303	6.83783	6.42137	5.03546	5.02574	7.23436	7.11168	3.91909	4.5171	4.48372	4.4406	6.00975	5.83748	5.74813	5.31756
ENSBTAG00000001564	PDE4DIP	0	1	0	0	1.86806	1.91216	1.81289	1.87475	4.30586	4.32355	1.63564	1.41867	8.35851	8.42683	2.38004	2.50138	2.86241	2.97264	2.32382	2.4307
ENSBTAG00000001582	AKR1B10	1	0	0	0	5.33867	5.19536	0.220074	2.04261	1.61406	0.710315	9.49638	9.21646	1.00615	0.218711	2.45823	1.17572	3.62373	3.44632	3.47637	4.06372
ENSBTAG00000001605	DIO2	1	0	0	0	9.87627	10.1195	3.30218	2.50967	9.13546	8.9509	1.89295	0.155646	2.09103	3.77058	1.65418	4.10266	12.4807	12.8333	8.78628	7.68928
ENSBTAG00000001615	RUNDC3A	0	1	0	0	2.52331	1.97927	1.66604	1.79894	9.7148	9.81682	0.645099	0.910925	1.15488	1.17972	1.68821	2.31152	9.02054	9.12272	3.27226	3.26868
ENSBTAG00000001618	ALPK3	0	1	0	0	2.33428	1.64433	1.97145	2.30202	1.72291	2.07425	0.538709	0.303213	7.43508	7.53901	2.34221	2.60276	4.12996	4.18844	2.97645	2.82784
ENSBTAG00000001631	KIFC1	0	1	0	0	2.64045	1.30212	1.99971	1.94714	1.56993	1.33816	1.26227	0.846175	0.672913	0.543009	4.86484	4.50443	1.24085	1.2623	3.41726	2.06754
ENSBTAG00000001634	PHF1	0	0	1	0	4.74094	4.85336	5.37713	5.19495	5.36734	5.33073	4.82625	4.6713	4.33677	4.33643	4.94191	4.83226	5.71372	5.60535	4.49524	4.73773
ENSBTAG00000001638	FGA	1	1	0	0	5.76335	5.78096	7.81105	10.4928	3.85861	4.71237	19.9937	20.062	9.44239	7.47023	4.98188	8.14119	7.81431	5.11255	9.66624	9.47491
ENSBTAG00000001642	TTC34	1	1	0	0	10.3775	10.2791	2.41488	0.386182	7.23331	8.0842	0.443186	0.781262	0.367411	0.117932	4.26237	1.47116	3.37483	3.2633	8.73073	6.4939
ENSBTAG00000001658	AKR1D1	1	1	0	0	3.05907	2.95532	3.40557	6.26368	1.66634	2.08948	15.909	15.9222	5.23546	3.68066	2.51329	4.07046	3.73936	2.54139	5.86389	5.1221
ENSBTAG00000001668	WNT7A	1	0	0	0	10.6112	9.90215	0.389015	0.158369	11.3636	11.2388	2.77714	4.16624	2.23123	1.97584	6.43462	4.73494	0.311947	0.0667587	7.91797	3.7507
ENSBTAG00000001686	LRRC52	1	1	0	0	1.57548	0.526005	1.07209	2.49873	0.167533	0.09069	0.732643	0.6558	5.76741	2.40542	0.866653	2.33093	7.38964	7.53561	1.15273	0.419895
ENSBTAG00000001704	KDM4D	1	0	0	0	3.21536	3.90422	2.04217	2.61006	7.32483	7.54803	0.133004	1.36003	3.79404	5.07288	4.16325	3.631	2.03487	1.0687	3.9585	4.34274
ENSBTAG00000001730	ODF3	1	0	0	0	3.80337	4.7358	2.94985	2.43106	1.1621	1.6204	0.752096	0.286591	1.22868	3.79718	4.74209	4.97943	5.9364	5.90462	3.69523	3.903
ENSBTAG00000001735	ADAM11	1	0	0	0	6.84893	6.72479	8.73605	8.94975	9.83135	10.0038	1.28185	3.01546	4.29448	3.96634	5.00377	5.12111	4.53565	5.02184	7.93546	7.98904
ENSBTAG00000001736	UBN1	0	0	1	0	2.71957	2.90642	2.94738	2.91286	2.5563	2.57114	3.15701	2.99406	3.33582	3.32073	2.89541	2.88593	3.24295	3.20378	2.60529	2.53566
ENSBTAG00000001739	CDH20	0	0	0	1	4.27716	4.66224	7.59326	7.76633	10.9449	11.1678	2.46568	3.87416	4.19159	4.60133	8.01268	7.45058	4.86209	5.2534	2.68972	3.33474
ENSBTAG00000001751	CXXC4	1	0	0	0	6.49806	3.138	1.21907	0.174284	11.3348	11.315	5.63116	5.22782	1.84076	0.761099	8.08311	8.5772	12.0065	11.6693	8.84968	6.94609
ENSBTAG00000001755	NEUROD1	0	1	1	0	0.0619417	0.224898	0.517635	1.25958	4.82161	6.48979	0.62411	0.80863	1.07556	1.79107	2.84543	4.20971	9.29886	9.59825	1.05109	0.574935
ENSBTAG00000001764	NCAN	0	1	0	0	3.60374	3.85845	1.76669	1.33137	13.4758	13.5013	1.79223	1.74609	1.21255	2.53985	1.2276	1.48123	2.70955	4.03651	1.93079	1.5937
ENSBTAG00000001765	HAPLN4	1	0	0	0	1.60705	1.47299	1.29693	1.0833	12.8915	12.7675	4.52753	2.21948	0.455991	0.226672	1.72595	0.0941625	4.78613	5.93732	3.79265	1.67833
ENSBTAG00000001770	ST8SIA5	1	0	0	0	8.22546	10.191	7.78696	7.58277	10.3936	10.7379	2.59802	4.42763	8.69587	8.89941	8.46653	8.84448	5.91558	5.96857	6.56886	6.91592
ENSBTAG00000001772	PDCL2	0	1	0	0	9.47271	9.44387	1.47405	1.28163	0.183262	0.685971	0.446163	0.307712	0.647327	0.508877	3.79318	3.05032	7.66862	7.49784	8.4267	5.7916
ENSBTAG00000001784	LDLRAD2	1	0	0	0	2.39962	3.29398	3.88986	2.28406	6.87694	7.3385	0.576731	0.515173	3.46794	3.42347	2.06436	0.589117	0.0660817	0.0638225	0.362436	1.00272
ENSBTAG00000001809	DUSP21	0	1	0	0	1.59821	0.519995	0.284405	0.27117	6.19152	6.72931	1.79204	1.00508	1.20138	1.92348	0.061225	0.04799	0.172968	0.156715	0.108515	0.09528
ENSBTAG00000001812	H1FOO	1	0	0	0	5.83962	4.88336	5.92956	5.78814	4.52336	4.84834	5.53359	4.49813	1.66575	2.18633	7.75988	7.67273	1.96759	0.0418837	5.62024	5.54726
ENSBTAG00000001819	CDX2	0	0	1	0	2.2262	0.629755	1.49876	0.570408	0.157271	0.0075225	0.722381	0.572632	0.923546	0.773798	1.318	0.360818	0.2433	0.0985225	0.177276	0.0275275
ENSBTAG00000001830	LRRC46	1	0	0	0	9.87049	9.65943	5.40053	4.63004	7.7063	8.34951	0.169196	1.50934	2.89633	1.67911	7.80538	7.24556	9.20618	9.3128	9.08855	7.79927
ENSBTAG00000001836	ULBP11	1	0	0	0	4.26716	3.71354	6.59078	4.97244	3.46851	0.899104	2.97913	2.49425	11.1538	10.3395	7.4615	6.91324	6.57204	6.05255	5.79707	3.95796
ENSBTAG00000001847	CNTLN	0	0	0	1	2.24511	1.59453	2.69715	2.88368	1.02268	0.90946	0.944748	1.02791	0.455462	0.614321	2.56398	2.59721	1.83626	1.8068	2.68391	2.36168
ENSBTAG00000001851	CES1	1	0	0	0	5.50513	4.26894	2.65408	1.45523	5.0353	4.34383	6.87176	6.75806	10.7234	9.97839	2.98394	1.75499	7.72315	7.05988	4.44726	0.817268
ENSBTAG00000001862	PPP2R2B	0	0	0	1	5.65766	5.63636	2.74812	2.94695	7.10284	7.21577	7.39984	7.42949	0.73163	0.677553	3.00688	3.18617	6.13269	6.23101	4.94101	5.25061
ENSBTAG00000001870	CPNE6	1	0	0	0	4.21973	4.05143	2.79875	0.620387	13.1168	13.2415	0.73242	1.48256	1.9972	2.27827	4.33426	3.23471	3.59707	3.52104	4.7795	3.11208
ENSBTAG00000001880	VGLL1	1	1	1	0	9.38358	10.5991	0.273153	0.0440437	1.83569	2.41481	1.95734	0.834514	1.86512	0.941694	4.58865	2.34093	4.70998	4.62328	6.02651	3.27812
ENSBTAG00000001903	C2orf50	1	0	0	0	11.0149	10.2479	9.01246	7.73589	7.74528	8.05408	5.04096	1.83747	1.70152	1.62748	4.90759	2.77846	5.31476	3.9398	9.77026	7.21396
ENSBTAG00000001915	APOH	1	1	0	0	6.5473	8.0045	5.69327	9.88792	5.67601	6.71325	19.6703	19.97	9.49981	8.51934	4.90957	8.1578	8.0851	6.22341	9.34891	9.32092
ENSBTAG00000001952	PROM2	0	1	0	0	10.6687	12.2932	3.13712	2.42287	4.59586	4.85338	2.67938	2.59615	2.03383	2.9805	4.89517	4.73869	8.67523	8.61376	8.66393	7.28927
ENSBTAG00000001976	PPP1R17	0	1	0	0	0.0735617	0.208207	1.27527	0.718277	10.7762	11.3728	0.665686	0.773937	1.20271	2.02352	0.0732913	0.181542	3.28257	4.96531	0.120581	0.228832
ENSBTAG00000001979	TAF7L	1	0	1	0	4.22003	5.42934	1.37722	3.40282	5.76816	6.14597	5.60364	6.17827	7.26113	7.8357	6.84618	7.75398	5.29332	6.97858	1.82698	4.07474
ENSBTAG00000001998	ST6GALNAC1	1	0	0	0	4.67471	2.31515	0.291191	0.101305	0.456426	1.0327	0.660411	0.470525	1.6694	0.930474	2.581	2.65024	6.00241	5.40609	2.92831	0.826565
ENSBTAG00000002007	PRG3	1	0	0	0	2.764	4.44623	3.59942	1.36184	0.0863387	0.103286	0.651449	0.668396	0.852614	0.86956	2.49013	1.67246	0.159497	0.189716	1.14209	3.35645
ENSBTAG00000002019	SERPINB5	1	0	0	0	8.58686	9.55638	4.37874	1.66654	2.46016	3.35448	0.992108	0.902762	0.186261	0.882885	6.84213	5.7325	9.94653	9.86933	7.56038	7.21307
ENSBTAG00000002023	NOS1	1	0	0	0	3.66623	7.12851	5.17356	5.89513	8.83578	9.42265	1.40949	1.30859	10.1226	10.5509	4.33866	4.32051	6.06515	6.15067	2.2304	4.02978
ENSBTAG00000002024	ASB18	0	1	0	0	1.76639	1.34247	0.716659	0.0808463	2.762	3.62508	0.304604	0.199781	11.4755	11.1968	4.16931	2.65493	0.96018	0.0623563	3.98898	4.19787
ENSBTAG00000002030	SPP2	1	0	0	0	6.56894	5.13512	10.4496	11.0797	2.68892	2.91132	18.009	18.0768	9.87511	9.63982	3.65299	6.3462	6.05683	3.63417	7.86331	7.79479
ENSBTAG00000002046	COX8B	0	1	0	0	2.39893	2.54832	4.92402	6.3503	3.95757	4.27146	1.36094	1.1243	11.5386	11.431	2.22587	1.55651	3.39466	2.51989	1.17098	0.759815
ENSBTAG00000002066	MYL7	0	1	0	0	2.21565	2.07073	1.6152	0.640943	1.26086	0.394288	1.02745	1.63507	3.42952	2.59633	8.2997	8.21712	0.230173	0.117943	1.77179	1.56915
ENSBTAG00000002089	FAM217A	1	0	0	0	5.10616	6.87583	4.53982	5.02947	6.08623	6.36125	7.08897	6.59907	1.64792	2.64022	6.62716	6.99878	7.90024	8.20004	0.638336	3.33493
ENSBTAG00000002097	TMC5	0	1	0	0	10.659	9.69447	1.39917	1.07909	5.75223	6.52432	4.00575	2.88831	1.40525	0.774445	7.86799	6.77202	5.16934	5.1008	11.3121	10.8059
ENSBTAG00000002100	GZMM	1	0	0	0	6.51142	5.22321	3.5694	5.88781	5.20891	4.9083	8.86545	9.22943	0.0750125	0.984699	8.24196	7.74569	1.33598	2.25558	6.77743	6.78065
ENSBTAG00000002132	DRD3	0	0	0	1	0.05267	1.17984	1.5313	2.33163	7.14489	7.77758	3.44317	2.22874	0.479489	0.598386	1.23207	1.8894	4.26576	5.55762	1.0099	1.11437
ENSBTAG00000002134	FAM196B	0	1	0	0	0.03585	0.0795317	0.237409	0.30294	6.90928	7.06064	0.606629	0.67216	0.807794	0.873325	1.15208	1.26949	4.13192	5.35196	0.0615187	0.12705
ENSBTAG00000002139	MIXL1	1	0	1	0	4.90769	4.17462	1.67446	0.593403	7.27997	6.11388	2.42854	2.00767	1.22325	0.836518	6.95183	5.45946	0.566842	0.186842	6.13051	1.90136
ENSBTAG00000002154	GPR141	1	0	0	0	5.71	5.07562	1.05019	2.82265	4.59344	4.95169	4.97313	3.131	1.49354	1.12799	5.4429	5.04602	3.38644	4.8045	5.66648	5.53277
ENSBTAG00000002157	LMOD2	0	1	0	0	1.05934	1.99219	2.54748	2.05283	2.5628	2.71695	4.90408	4.85014	12.8052	12.896	1.87417	1.67362	2.12035	2.51801	1.62363	1.99965
ENSBTAG00000002163	PTGER2	1	0	0	0	8.05966	8.49677	5.00706	5.10786	1.65846	3.59099	5.43277	5.54954	3.75289	4.44454	6.94356	6.77909	5.90834	6.21237	7.13363	7.14533
ENSBTAG00000002167	NPHS2	0	1	0	0	1.36307	0.349825	0.454046	0.994679	4.60617	4.6882	0.549651	0.509803	0.750816	0.710967	7.98502	7.32321	0.0391133	0.0539975	1.33393	1.23712
ENSBTAG00000002174	RERG	0	0	0	1	1.14968	0.29552	1.42953	1.53207	1.58467	1.76883	1.20522	1.17243	0.604846	0.615619	3.22915	3.41346	3.57795	3.68496	3.55697	3.98693
ENSBTAG00000002188	C16orf89	1	0	0	0	7.30547	8.00891	6.93589	7.51596	9.13469	8.82218	0.846322	0.758245	6.42767	4.95173	5.06065	2.30076	6.21564	9.37553	6.28516	6.14709
ENSBTAG00000002192	C14H8orf46	1	0	0	0	5.00437	4.74591	4.77348	4.53169	12.1727	12.2538	4.11266	3.73252	3.71749	4.22946	2.99938	2.65802	0.907923	3.06727	6.87193	8.42821
ENSBTAG00000002205	CNGA1	1	1	0	0	7.23034	10.4348	3.43374	2.30845	0.573035	0.667206	1.37167	2.05432	0.626877	1.31541	5.82888	6.10786	4.14201	3.66087	3.74717	3.52838
ENSBTAG00000002216	MYOD1	0	1	1	0	1.30948	0.406342	1.16577	0.510879	6.14207	5.71231	0.753713	0.629814	13.1415	13.023	0.161318	0.0374188	1.64169	1.34705	3.52839	2.77978
ENSBTAG00000002224	UHRF1	1	0	1	0	3.69706	1.91147	2.59007	2.50983	3.82834	3.66078	2.76628	2.34877	2.98372	2.696	5.74079	5.2344	0.95971	0.562682	4.79859	2.05245
ENSBTAG00000002252	CHRNA2	1	0	0	0	4.76522	9.7129	1.31113	0.542412	11.8347	12.3351	3.07853	2.9079	0.644816	2.23006	6.37268	8.98187	7.05782	7.62164	0.564181	3.56163
ENSBTAG00000002255	BHMT	1	0	0	0	4.98441	4.83621	3.11502	6.18326	2.95489	3.19306	15.4474	15.945	5.09165	2.84896	1.9572	4.49095	4.43261	4.12326	5.73152	6.05963
ENSBTAG00000002257	KLK11	1	0	0	0	9.78832	10.8476	8.35233	8.33122	0.834255	0.244978	0.672769	1.44965	5.57429	5.25672	7.45721	7.3399	3.08591	5.2438	7.81021	8.27102
ENSBTAG00000002261	LBX1	1	1	1	0	0.120923	0.0242767	0.326454	0.24099	2.25139	0.724505	0.695669	0.610205	12.1162	12.0865	2.37079	1.61653	0.554598	1.10527	0.150564	0.0651
ENSBTAG00000002278	FBN1	0	0	0	1	3.51105	3.2673	7.417	6.88021	1.60434	1.52556	0.946026	0.928566	4.09455	3.8985	4.02786	4.02389	2.18551	2.10026	3.66542	3.63394
ENSBTAG00000002289	NLRP14	0	1	0	0	2.45586	1.38041	0.776459	0.148701	0.934574	1.32297	0.350799	0.263281	1.2113	0.675666	7.54278	7.0163	0.774048	0.0379063	3.17687	3.79656
ENSBTAG00000002294	SIM1	1	0	1	0	0.129562	0.874933	2.65918	1.68448	6.72771	9.2185	0.403765	0.437116	6.59788	5.687	0.854554	0.77058	1.93225	2.16868	0.666485	0.150796
ENSBTAG00000002295	ATF2	0	0	1	0	4.31317	4.37495	3.93454	3.89081	4.2152	4.23626	3.72223	3.70125	3.52153	3.51416	4.18759	4.18723	4.40141	4.3851	4.3813	4.34694
ENSBTAG00000002341	ETS1	0	0	1	0	2.72676	2.41827	4.97807	5.07386	1.63209	1.74206	3.82095	3.87473	3.38849	3.32614	3.95125	4.07558	1.93251	1.89347	2.65011	2.88142
ENSBTAG00000002369	TMEM217	1	0	0	0	2.05479	6.41359	1.19204	0.734276	3.65302	5.26185	0.717999	0.833356	1.86253	1.33673	0.125604	0.240961	1.48684	0.679426	1.15824	0.603906
ENSBTAG00000002381	ZDHHC5	0	0	1	0	3.35998	4.15101	3.86071	3.87106	2.7731	2.93616	3.18817	3.17416	3.07858	3.15235	3.20905	3.24828	3.27113	3.34758	3.04504	3.17666
ENSBTAG00000002390	C5H12orf68	1	0	0	0	7.73354	6.94771	5.2103	5.25836	11.7541	12.0627	0.766005	2.57595	3.25927	4.36528	7.35326	7.38018	9.48052	9.63302	7.18555	6.66956
ENSBTAG00000002391	TGFB1I1	0	0	1	0	4.52152	3.29892	4.04492	3.83891	0.526649	0.556003	0.792615	0.776732	2.46084	2.62409	4.89519	4.46047	1.24377	1.17219	5.76467	5.88124
ENSBTAG00000002483	HES5	1	0	1	0	4.7417	5.38214	0.935046	0.952786	10.1314	10.2705	0.184347	0.123584	2.20674	0.908178	1.78182	3.31155	8.07178	7.96617	5.26939	3.04719
ENSBTAG00000002489	PIFO	1	1	0	0	10.8705	10.6854	0.631792	1.32191	4.75394	6.42955	0.636312	0.552698	1.17001	1.79187	3.63413	1.11043	0.147888	0.0969775	9.25083	7.00268
ENSBTAG00000002555	PDZK1IP1	1	0	0	0	10.2222	12.9624	4.54183	3.7974	0.960851	3.87494	8.12503	7.94789	2.26283	3.0471	7.61708	7.87387	9.25992	9.55861	8.28108	7.48648
ENSBTAG00000002568	GPKOW	0	0	0	1	4.39796	4.66488	4.52334	4.36378	4.63259	4.68564	4.47136	4.42183	4.87172	4.89404	4.39179	4.32755	4.64234	4.59755	4.33363	4.35527
ENSBTAG00000002573	UBA2	0	0	0	1	5.26785	5.33485	5.3376	5.24082	4.7971	4.79687	4.59632	4.49203	4.87439	4.9203	5.59606	5.54069	5.46894	5.44642	5.49768	5.16507
ENSBTAG00000002574	MYOZ2	0	1	0	0	1.82889	2.57511	2.37588	2.09673	0.46868	1.00286	2.29597	2.04865	11.5619	11.4964	1.89943	2.04986	2.56426	2.52717	2.08807	2.19602
ENSBTAG00000002583	DNALI1	1	0	0	0	8.82871	8.51752	3.97171	3.49959	8.72842	8.83888	4.59586	4.32783	2.94925	0.612607	7.12531	6.1067	5.53485	5.57929	8.0994	6.57642
ENSBTAG00000002590	EXOSC10	0	0	0	1	4.30416	4.02446	4.61936	4.44536	4.20828	4.19715	4.49804	4.35555	4.35041	4.33516	5.56751	5.38393	4.30184	4.31276	4.40974	4.11499
ENSBTAG00000002604	SP8	0	1	1	0	0.0378617	0.144003	1.60458	2.33024	6.86959	8.03692	0.628239	0.725815	0.829404	0.92698	0.0358438	0.13342	0.145592	0.23122	0.0831288	0.180705
ENSBTAG00000002635	PGLYRP1	1	0	0	0	5.48098	4.7819	1.76539	4.26468	3.62633	3.41471	3.86327	1.77513	1.77822	0.947611	6.48739	6.2496	4.71984	4.5091	6.87736	6.35441
ENSBTAG00000002642	SLC17A2	0	1	0	0	2.59911	2.69701	2.41259	3.9478	0.839286	1.57475	14.5851	14.7652	4.32754	3.94181	2.06457	3.00276	2.79681	3.05303	4.21425	3.23559
ENSBTAG00000002670	C28H10ORF10	1	1	0	0	7.63373	6.94883	15.1463	14.5571	2.02924	2.65223	8.78092	8.35507	8.88854	7.53983	10.2592	9.25874	7.64933	7.34216	7.23979	7.46314
ENSBTAG00000002674	GNGT1	1	0	0	0	2.43429	3.98444	3.9337	6.95615	8.37591	8.90284	0.194987	0.76669	2.90722	4.96327	3.35755	5.15339	2.96505	5.14377	2.46641	5.72919
ENSBTAG00000002675	CCDC7	1	0	0	0	7.28447	6.10552	0.350541	1.2377	1.88146	1.03408	4.07602	3.75023	1.25457	0.399877	3.88936	3.84213	7.19955	6.23455	6.63578	2.96577
ENSBTAG00000002695	MYO1H	1	0	0	0	6.21212	5.47391	5.46801	5.18209	4.63026	4.90061	0.586695	1.21963	2.24902	3.72612	3.7696	3.29806	2.17406	4.11165	6.08254	5.3054
ENSBTAG00000002710	TSSK4	1	0	0	0	6.72907	6.37576	6.12451	6.19859	6.49009	6.32636	4.00844	2.40721	4.90137	5.18603	5.41157	5.60438	6.50779	6.38998	6.2957	6.53133
ENSBTAG00000002733	DBX1	1	1	1	0	0.144782	0.0240467	2.99681	1.05477	1.58452	1.23564	0.744971	0.584331	7.80415	7.46025	1.37736	1.33848	7.03961	5.84963	0.199866	0.0392263
ENSBTAG00000002749	CRHR1	1	0	0	0	9.59272	6.66797	2.24824	1.08762	11.1867	11.272	1.14932	0.13996	11.5802	11.1325	1.46554	1.68647	11.5578	11.1993	7.43592	3.04734
ENSBTAG00000002765	CYP24A1	1	0	0	0	6.6979	7.24492	1.05449	2.43543	4.34638	6.9055	0.820383	0.790615	2.28172	2.52537	3.27597	2.14075	4.31314	4.32985	5.51528	2.64309
ENSBTAG00000002779	GABRP	1	0	0	0	7.36014	6.82533	1.59008	0.166711	0.129559	1.96661	0.278984	1.23412	0.949508	0.993971	1.4925	1.71703	10.164	10.1068	6.0997	5.23824
ENSBTAG00000002786	A6QQH0	1	0	0	0	2.34493	0.247698	4.90754	2.6062	4.54301	3.85962	5.08029	4.40786	2.87702	2.47547	3.53175	2.5592	3.04595	2.16755	2.29288	1.94664
ENSBTAG00000002834	CCDC69	0	0	0	1	4.52167	3.79746	9.70909	9.80174	0.984466	1.08286	3.52292	3.52444	7.56561	7.33432	6.30213	6.65426	5.36219	5.06686	5.56026	5.74061
ENSBTAG00000002856	MEIG1	1	0	0	0	8.19832	7.28029	0.152355	0.0880087	6.60261	7.88853	0.52157	0.457224	0.722735	0.658389	5.33477	6.604	8.98241	8.65927	7.38322	4.23782
ENSBTAG00000002865	KCNIP1	1	1	1	0	5.67906	4.33122	3.91357	0.831209	12.0073	12.0696	0.296108	0.84004	3.82585	4.09508	11.2533	11.4286	10.2963	10.1531	6.26151	5.52342
ENSBTAG00000002868	GPR6	0	1	0	0	0.133272	1.02679	0.749429	0.258171	9.27259	9.01888	0.337375	0.377106	0.53854	0.578271	0.250575	1.36296	9.62891	10.0447	0.666779	0.112151
ENSBTAG00000002880	SORBS1	0	0	0	1	3.80199	3.38058	5.09044	5.34897	3.10973	3.23468	2.6318	2.54998	4.32697	4.60167	2.35417	2.33934	1.72669	1.92439	4.37582	4.44102
ENSBTAG00000002898	UNC45B	1	1	0	0	5.41751	7.75758	3.96553	2.87899	1.53425	3.55232	2.67692	3.44638	14.5878	14.748	4.78716	4.38889	4.12739	4.21362	4.32088	5.25538
ENSBTAG00000002912	INHBA	0	1	0	0	3.50857	1.98828	1.54381	1.77641	2.96968	2.83046	4.15719	3.32254	1.39996	1.41706	8.4698	8.29488	2.16148	2.1179	3.32976	3.32743
ENSBTAG00000002919	UNC5CL	1	0	0	0	10.6682	11.6385	2.39756	2.30477	2.75121	3.28682	11.6388	11.6084	5.77814	5.63653	2.53431	0.854936	4.73148	4.76595	7.5704	4.11388
ENSBTAG00000002924	DUPD1	1	1	0	0	4.77878	4.33177	5.016	1.67623	0.483336	0.091045	3.15454	1.33085	15.326	14.8723	4.71208	3.24954	2.84301	2.97438	4.82241	2.60507
ENSBTAG00000002929	IRF4	0	1	1	0	5.6396	5.22982	12.0766	11.3624	3.07101	2.73973	6.51054	6.24014	6.55259	5.75264	5.43696	4.83908	4.00341	4.35691	5.17927	5.10671
ENSBTAG00000002936	PRRX2	1	0	1	0	10.0495	9.25603	11.0711	10.7425	5.40961	6.01505	4.54082	2.53775	8.84236	8.78847	6.98681	7.11113	8.56847	8.57516	9.5132	8.96196
ENSBTAG00000002950	TMEM132D	0	1	0	0	5.43452	2.74852	0.380579	0.745483	10.3682	10.1257	1.78598	1.51986	0.677354	0.461776	8.6983	8.34123	1.86297	1.42777	6.40874	3.97594
ENSBTAG00000002955	ZNF37A	0	0	1	0	2.30309	2.50116	1.57831	1.63723	2.45369	2.3735	1.35601	0.967995	1.75537	1.25694	0.68383	1.08647	3.48424	3.40672	2.27979	2.21703
ENSBTAG00000002963	SAA4	1	0	0	0	3.27607	4.85607	3.2872	5.91314	4.98454	5.09058	15.6429	15.6799	4.9661	3.01955	2.12483	3.97967	4.28245	3.65402	5.06481	4.88678
ENSBTAG00000002964	TXLNB	0	1	0	0	3.6935	4.00354	4.03119	3.93058	3.41149	4.10915	3.83529	3.38897	14.2203	14.4568	4.88067	4.70955	4.05198	4.24662	2.99733	3.95464
ENSBTAG00000002983	NT5C1A	0	1	0	0	2.77542	1.86926	0.712766	0.952496	8.74974	8.75806	3.22586	1.93797	13.9938	14.1029	6.7936	6.93856	8.3728	8.12692	4.2889	4.51827
ENSBTAG00000002985	KCNMB1	0	1	0	0	5.73342	3.18103	4.64758	4.28564	0.950423	0.862599	0.961996	1.0496	2.63263	3.14117	3.55471	3.24919	1.86955	1.94149	7.55531	7.91028
ENSBTAG00000003006	RNASE9	1	1	0	0	7.11678	12.6622	1.69481	1.1768	1.0331	3.40296	2.42375	2.81092	2.01623	1.66744	1.5726	1.98715	0.1649	0.606106	6.96404	10.8971
ENSBTAG00000003016	PTPN7	0	0	0	1	3.52115	3.04977	2.72618	2.74493	2.26303	2.41798	3.81531	3.73416	1.22578	2.01715	3.6269	3.57303	2.28715	2.37315	3.18008	3.08303
ENSBTAG00000003019	CRYGN	1	0	0	0	3.72686	2.07776	4.22383	3.02188	5.79263	6.05183	1.42245	0.377875	1.98874	1.68627	8.29828	7.4842	7.38637	5.80843	2.04901	0.208115
ENSBTAG00000003020	SRCRB4D	1	0	0	0	6.67374	5.644	4.44841	4.32323	4.87974	4.06764	7.82263	7.2282	6.7981	6.52407	4.60892	3.48528	8.80054	8.32216	6.8067	3.45323
ENSBTAG00000003021	SP1	0	0	1	0	3.84464	3.89703	3.93183	3.92288	2.66427	2.6978	3.39794	3.40735	3.40753	3.39149	3.82422	3.7297	3.35564	3.3183	3.90015	3.83702
ENSBTAG00000003027	EMX2	0	1	1	0	12.3528	11.7671	8.58817	8.09341	8.59001	7.93206	3.94672	3.21502	7.46834	7.36123	9.83266	8.89306	2.19527	2.70162	12.7408	12.6611
ENSBTAG00000003030	KCNQ2	0	1	0	0	0.06431	1.85139	2.5653	2.64542	12.7925	13.0766	1.00519	1.5179	3.59428	3.97903	2.83881	3.53746	12.794	12.9925	2.58824	3.20182
ENSBTAG00000003060	NTRK1	1	0	0	0	6.75462	5.96474	0.61846	1.09156	9.43138	9.42996	4.80069	4.04987	5.72724	6.17587	9.85376	10.2196	1.48112	2.84264	4.56262	2.39595
ENSBTAG00000003077	DPF2	0	0	1	1	7.42299	7.52898	7.95283	7.92103	7.11636	7.14812	6.93786	6.89011	7.22728	7.23261	7.43031	7.31801	7.0927	7.06392	7.39005	7.35649
ENSBTAG00000003086	RPLP2	1	0	0	0	0.06761	1.41961	6.65778	5.53331	2.11743	3.3589	0.816324	2.62765	0.653384	1.69224	4.98047	5.24086	0.536525	2.52014	2.69552	2.93906
ENSBTAG00000003101	SALL4	1	0	1	0	1.53654	2.34239	2.4832	4.52149	5.91844	6.28362	8.30765	8.29712	6.6555	6.49037	5.53394	4.85436	5.80534	5.7499	0.527728	0.704152
ENSBTAG00000003103	EIF4E1B	0	1	0	0	0.115587	0.0912467	0.299872	0.33865	2.02377	2.98845	0.669092	0.70787	1.93834	1.25119	4.95286	6.38091	1.79657	0.677745	0.123988	0.162765
ENSBTAG00000003107	LHX5	0	1	1	0	0.0463283	0.0691517	2.94573	2.99882	9.61205	10.0997	0.625892	0.652659	1.07274	1.62075	0.0334975	0.0602638	0.149623	0.165224	0.900956	0.370294
ENSBTAG00000003110	FAM19A4	1	0	0	1	1.82722	0.556658	0.342854	0.249181	9.40606	9.49557	7.66563	5.5084	0.913234	0.819561	5.83211	6.94141	8.23365	7.96682	0.166964	0.0732913
ENSBTAG00000003120	MGC139239	1	0	0	0	3.41237	2.18437	3.1851	3.41251	3.75637	3.38506	3.48892	3.5025	3.66361	2.72691	4.12416	4.1835	1.93712	1.8336	2.86114	0.62754
ENSBTAG00000003134	CRYAA	0	1	0	0	0.204808	0.0461483	1.50985	0.595195	1.51618	0.464085	0.810983	0.62225	5.21126	3.32943	0.218592	0.02986	0.322875	0.1601	0.265877	0.077145
ENSBTAG00000003135	IQCJ	1	1	0	0	3.84192	1.20143	0.423626	0.268646	9.46673	9.80556	0.792841	0.637861	0.994006	0.839026	8.13262	6.61735	0.320663	0.172301	0.247736	0.0927562
ENSBTAG00000003137	LPPR1	1	0	0	0	9.50429	9.04101	7.16719	6.156	11.1946	11.0511	1.40672	0.0697437	7.62282	7.84215	9.6462	9.39717	9.85294	10.1076	10.5293	11.3809
ENSBTAG00000003163	C20orf151	1	0	0	0	7.49821	7.94172	0.790263	0.0880475	1.27405	1.75752	2.44875	1.60629	0.608886	0.417602	3.03575	2.89336	8.59491	8.05262	5.47781	2.15839
ENSBTAG00000003164	B3GALT1	1	0	0	0	8.62311	7.77333	1.57309	3.2849	9.58843	9.8227	12.0346	12.1555	4.79382	6.3233	8.64374	8.50086	8.44842	8.70962	8.53641	8.43185
ENSBTAG00000003172	MEIS2	0	0	1	0	5.19372	3.63768	4.34628	4.02551	4.06506	3.63127	2.32405	2.22299	0.819396	0.463846	4.6209	4.25264	3.27112	3.07167	6.49964	6.44792
ENSBTAG00000003184	GATA1	0	0	1	0	1.42035	2.92246	5.7268	6.17548	2.94647	4.62257	0.0786825	0.935855	3.41278	3.0003	4.0644	5.07518	2.52332	2.0274	4.46758	4.40674
ENSBTAG00000003207	SP5	1	0	1	0	7.81451	6.51021	5.63307	4.90202	6.2533	6.72232	11.1983	10.9686	2.49498	2.01568	5.04985	2.22096	0.332092	0.0768838	6.50795	4.73494
ENSBTAG00000003221	ATF7IP	0	0	1	0	3.25616	3.31703	2.92909	3.07295	2.45698	2.46106	3.0878	3.07038	2.89657	3.13115	3.10198	3.19074	3.18197	3.23139	3.35575	3.29537
ENSBTAG00000003231	LIM2	1	0	0	0	4.89592	3.67814	5.34245	4.65132	3.48206	4.22262	5.48675	5.09372	2.0255	1.98499	0.874062	0.886659	2.69433	5.04805	2.59921	2.50995
ENSBTAG00000003234	HSD17B2	1	0	0	0	5.92901	1.31214	3.76225	3.49361	2.17467	1.0005	13.6141	12.8915	0.813474	1.10482	1.10238	0.986546	6.19044	4.17488	4.84572	2.68743
ENSBTAG00000003250	F1MY89	1	0	0	0	6.97262	5.76586	2.25286	2.77693	3.08048	1.84681	4.23027	2.5558	2.3647	1.21654	3.11191	1.78889	0.426812	0.147382	4.65467	3.53473
ENSBTAG00000003260	GPR151	1	0	0	0	4.80961	4.28692	4.65383	3.78231	5.488	4.95113	2.45149	0.735819	3.40196	4.12163	3.17051	4.23614	6.3001	6.42539	5.21342	5.10001
ENSBTAG00000003272	E1B8U6	1	0	0	0	4.15369	6.84095	2.09345	3.70223	0.141101	1.06663	7.15853	6.70098	0.615481	0.921743	1.67452	1.85961	6.85549	6.42892	2.51676	5.93717
ENSBTAG00000003278	HOXC10	0	1	1	0	8.47038	7.16375	11.8492	11.4876	0.887065	0.781779	1.81472	2.59577	13.137	12.8476	4.24098	3.51321	1.57288	1.20824	11.2364	10.7911
ENSBTAG00000003280	MGC137055	1	0	0	0	3.99757	6.74378	3.93976	5.70395	4.92823	6.64212	4.88165	6.41041	6.46874	8.28153	4.5407	6.11955	6.43513	6.39174	4.31883	6.00588
ENSBTAG00000003297	OASL	1	0	0	0	6.33246	6.19599	4.11231	4.91125	1.42792	1.29655	6.49591	6.28163	0.904605	3.0595	6.08584	6.56981	3.44089	4.85763	4.51356	4.80591
ENSBTAG00000003308	GRID2IP	1	0	0	0	5.75073	5.23417	5.34651	5.04219	8.87329	9.48103	0.0795625	1.28498	3.74947	2.58207	5.27759	6.35224	11.6984	11.9324	5.12002	5.02192
ENSBTAG00000003320	GLRA4	0	1	0	0	7.421	6.04748	0.54901	1.02102	10.4492	10.1305	0.6774	0.638475	0.878565	0.83964	0.085005	0.04608	0.823907	1.993	8.49491	7.54983
ENSBTAG00000003329	FST	0	1	0	0	6.00877	6.77698	6.83066	6.33392	1.38322	1.70672	3.79961	3.69222	5.34957	5.05192	10.1664	10.0668	2.95577	2.91831	5.16248	5.6002
ENSBTAG00000003353	SLC6A2	0	1	0	0	6.92086	6.03226	11.6279	11.2504	5.72761	5.23751	1.78682	0.900101	7.71358	7.05771	5.25704	4.47532	4.55806	4.34448	6.90825	5.81427
ENSBTAG00000003357	CLRN2	1	0	0	0	0.0884017	0.21227	1.18237	3.20158	2.26999	3.42947	10.2319	10.5124	3.74177	1.91712	1.16891	0.553561	0.647958	1.59001	0.674321	1.98882
ENSBTAG00000003392	GABRA5	1	0	0	0	1.23228	1.47197	0.594464	0.0971538	12.48	12.2973	1.03486	0.489174	1.42714	1.37994	2.70765	0.622434	3.22275	5.37364	1.90083	2.34484
ENSBTAG00000003398	KCNG1	0	1	0	0	9.93634	7.81205	5.12173	5.27039	9.86151	9.62792	4.00441	4.34614	4.91475	4.52165	5.58482	5.08735	3.09049	2.76453	12.3112	12.9682
ENSBTAG00000003442	LRIT1	0	1	0	0	0.742632	2.57131	0.206381	0.352594	4.36595	6.09145	0.575601	0.721814	0.776766	0.922978	0.237846	0.9243	1.37661	0.600774	0.0304963	0.176709
ENSBTAG00000003467	SLC5A11	1	0	0	0	4.91523	6.58234	3.6728	4.00975	12.4123	12.6336	0.785917	1.67505	1.41144	3.75626	8.40811	9.22753	3.99456	4.03968	3.73898	4.21718
ENSBTAG00000003479	MATN1	1	0	0	0	6.04459	3.59346	5.73332	3.88565	5.76808	4.3452	1.01827	0.0416838	1.53561	1.31096	7.7147	7.20846	4.02874	2.32736	6.94575	5.97237
ENSBTAG00000003495	JHDM1D	0	0	1	0	2.29446	2.46932	1.37643	1.65688	1.13844	1.04013	1.48362	1.41816	1.54983	1.94926	1.51542	1.54953	1.45082	1.38148	2.35867	2.49838
ENSBTAG00000003509	PLEKHA2	0	0	0	1	2.37098	2.23163	2.27164	2.37988	1.8358	1.9734	0.765774	0.931338	0.66052	0.959266	2.79887	2.82451	1.91396	2.02489	2.84463	2.96104
ENSBTAG00000003515	SNCG	1	0	0	0	6.99599	6.78018	12.9009	12.8933	13.258	13.6552	4.38428	2.60873	7.45055	5.99625	5.37627	4.7546	9.85795	9.82869	6.56336	6.23661
ENSBTAG00000003523	F1MRL5	1	1	0	0	2.92977	3.04949	3.33968	5.45782	2.12189	2.75424	15.0054	15.0637	3.32101	1.66281	2.35909	1.65498	2.13127	1.03084	3.64121	4.36778
ENSBTAG00000003532	TLE4	0	0	1	0	2.73199	2.6598	2.03012	1.82159	3.30101	3.22526	1.92532	1.72112	3.42579	3.1616	2.47245	2.40053	3.65952	3.65068	2.33895	2.2494
ENSBTAG00000003540	MYT1L	0	0	1	0	4.96779	4.97973	4.03723	4.60705	10.9705	11.0165	1.13607	2.03413	4.22049	4.69985	4.99281	5.33033	8.72269	9.24482	5.18713	5.39217
ENSBTAG00000003564	HPX	1	1	0	0	4.50535	4.55135	5.44785	8.65485	2.49447	2.93108	18.8636	18.8344	7.86543	4.97656	3.91175	6.57001	6.36652	4.02454	7.9927	7.73609
ENSBTAG00000003568	CLDN10	1	0	0	0	11.6137	9.97049	3.83008	3.85076	10.482	10.3775	3.50111	1.78952	2.6429	4.40184	5.83802	5.14688	6.70349	6.26153	11.4835	9.31929
ENSBTAG00000003594	RIBC2	1	1	0	0	12.0047	11.6739	1.96817	1.59343	6.72114	8.42665	3.11097	3.00008	0.898066	0.718912	4.91372	1.64936	2.31906	3.9499	10.1565	7.13378
ENSBTAG00000003624	CNTF	1	0	0	0	0.664108	2.81064	7.20109	7.22592	8.26988	8.77992	2.51948	3.20584	8.47364	8.30377	2.87211	3.15821	6.74849	4.40239	0.115934	0.945354
ENSBTAG00000003626	MYO3B	1	0	0	0	3.32443	6.86032	0.51889	1.23357	4.3201	3.70203	1.81028	3.00292	0.0712125	0.2387	1.2311	0.759151	2.70982	3.04043	4.07331	4.40511
ENSBTAG00000003633	TRY1	0	1	0	0	0.486318	1.54528	1.8724	2.68316	0.0671937	0.186711	9.22767	9.22537	0.833469	0.952988	1.80114	2.74954	0.133682	0.269021	0.0871987	0.206716
ENSBTAG00000003640	GJD4	0	1	0	0	0.02578	0.0452583	0.257373	0.253605	6.57685	7.15813	0.626592	0.622825	1.78587	1.13092	0.0341975	0.03043	0.146462	0.136675	0.0814875	0.07772
ENSBTAG00000003651	OTOP1	1	0	0	0	5.33827	3.14962	6.50388	6.38085	5.80511	5.34634	3.82769	1.81369	5.38344	5.58151	5.98291	5.55868	5.72083	5.49742	5.66941	5.55477
ENSBTAG00000003666	ZPLD1	0	1	0	0	1.37053	0.51307	0.233784	0.307732	0.0378887	0.111838	0.602999	0.676948	1.395	2.72243	4.8342	5.04474	0.475555	1.22154	0.0578938	0.131842
ENSBTAG00000003667	TLN2	0	0	0	1	4.25911	3.54109	5.02846	5.23909	4.93519	4.911	0.272872	0.332621	6.66875	6.61267	3.77134	3.65958	3.65927	3.33189	4.80422	4.42288
ENSBTAG00000003691	NTSR2	1	0	0	0	4.60562	3.03263	8.80425	8.56458	12.4944	12.4794	0.984326	1.46272	6.66435	5.97928	6.34933	6.60471	6.4252	7.00429	4.27128	1.96528
ENSBTAG00000003733	TM4SF5	0	1	0	0	1.83235	2.12398	0.905984	1.60635	3.12054	3.25751	9.16934	9.29961	1.03405	1.13068	1.29719	1.54828	2.42748	2.1772	1.57912	1.14248
ENSBTAG00000003749	KCNMB4	0	0	0	1	1.55553	2.07948	2.66491	2.55703	3.28011	3.43654	2.75906	2.67669	1.34352	1.44675	1.61919	1.47253	0.612167	0.526466	1.11811	1.57634
ENSBTAG00000003751	MACC1	0	1	0	0	9.71652	9.40809	0.82679	0.676825	0.663451	0.582553	1.20665	1.07925	0.346811	0.265914	4.93518	4.58041	4.04352	3.39574	9.51434	9.04768
ENSBTAG00000003774	C8A	1	0	0	0	6.74627	7.0517	3.5512	6.71915	2.09953	3.19567	16.3567	16.3776	6.0069	4.42495	3.29539	5.00294	4.70951	2.86936	6.61746	6.16045
ENSBTAG00000003775	C8B	1	0	0	0	6.98878	6.47856	6.04136	7.8175	5.05593	4.92883	16.6288	16.7067	6.5353	5.49412	4.89904	6.41541	5.99617	5.2199	6.7099	6.43071
ENSBTAG00000003797	SLC17A3	1	0	0	0	0.859423	1.9829	1.55817	4.42619	1.60511	2.342	13.9355	14.2701	3.50119	2.67725	2.95586	3.06483	2.33059	2.79429	2.79331	3.06304
ENSBTAG00000003818	PGC	1	1	0	0	7.36328	8.58253	0.296212	0.515334	2.98233	5.66992	0.665428	0.884549	1.85195	1.40138	0.0730325	0.292154	0.170478	0.393364	7.2244	8.76031
ENSBTAG00000003837	RSPO1	0	1	0	0	10.3073	7.54959	5.84881	4.46659	3.65093	4.18503	1.28075	2.23027	2.97389	2.4051	6.85254	5.85928	2.06946	2.86809	12.358	12.5072
ENSBTAG00000003843	SMARCAL1	0	0	1	0	4.46862	4.13813	3.81127	3.72439	3.22091	3.15455	3.48403	3.39702	3.7496	3.78126	4.25767	4.12611	4.17015	4.1696	4.55527	4.37919
ENSBTAG00000003850	INSL5	1	0	0	0	7.46826	7.09554	1.44222	1.20209	6.79181	4.51434	0.33096	0.118205	0.532125	0.31937	2.35618	2.56405	2.28905	2.55992	4.78692	2.20322
ENSBTAG00000003865	CASR	0	1	0	0	1.65309	1.58417	2.46785	1.24991	5.96024	6.14656	1.20156	1.56456	1.77311	1.35517	4.70288	5.22063	10.7246	11.4182	0.835035	0.427629
ENSBTAG00000003871	CYP2B6	0	1	0	0	7.94977	8.32452	13.5078	13.856	2.75924	2.76588	12.2635	11.99	7.811	6.82424	5.6875	4.86336	5.16758	4.49806	6.46192	5.89189
ENSBTAG00000003880	EMILIN2	0	1	0	0	5.44684	4.96756	8.0727	7.68448	0.789201	0.832601	1.21625	0.68102	3.47365	2.82804	4.2594	3.84883	1.16496	0.999735	4.49653	4.09835
ENSBTAG00000003891	VAMP2	0	0	0	1	7.84286	8.22365	8.62494	8.52135	10.2038	10.4355	7.31866	7.30273	7.74701	7.82329	7.62366	7.66666	8.73063	8.90167	7.75472	7.94221
ENSBTAG00000003894	NDRG4	1	0	0	0	6.38667	7.90153	5.35407	5.45388	10.7972	11.1124	1.10672	1.62837	4.4695	4.95144	5.11449	5.37567	6.25859	6.37882	7.16078	9.69345
ENSBTAG00000003898	HMGCS2	1	1	0	0	3.9619	4.29469	5.49391	7.63952	2.39389	2.91615	16.8672	16.7946	6.58791	5.21831	5.32012	6.0267	5.0863	2.7513	6.50225	6.13804
ENSBTAG00000003906	SUPT7L	0	0	1	0	1.5436	1.68708	1.59652	1.50663	1.9235	1.97836	1.35003	1.36447	1.80466	1.86166	1.59342	1.65917	2.09527	2.11773	1.49651	1.6037
ENSBTAG00000003910	SH2D4B	1	0	0	0	3.09664	7.16039	1.13597	1.26006	6.00915	6.22653	4.63686	6.70582	1.54611	1.71664	5.78665	5.28294	0.0615817	0.838102	1.45245	0.466124
ENSBTAG00000003971	E2F1	0	0	1	0	2.58801	2.25124	2.25971	2.43741	2.42814	2.319	1.33601	1.24973	0.833299	1.35075	4.39303	4.22173	2.1458	2.15015	2.96075	1.95182
ENSBTAG00000003975	LMAN2L	0	0	0	1	2.62861	2.80956	3.39992	3.52205	3.4643	3.72321	3.01598	3.14274	3.20133	3.33505	2.91303	2.95777	3.2677	3.31495	2.63269	2.66108
ENSBTAG00000003992	LHX4	1	0	1	0	2.22458	4.52389	1.26313	1.46458	2.76923	4.18803	1.46074	2.45187	0.10727	0.463649	3.50203	5.54474	9.90457	10.6348	2.48336	4.01901
ENSBTAG00000004003	F9	1	1	0	0	3.30084	3.24611	5.86911	7.71925	2.06534	2.88859	16.1307	16.1849	6.05049	5.27374	2.56339	4.63012	4.25355	2.44213	5.63401	5.38542
ENSBTAG00000004007	MCF2	1	0	0	0	7.1472	7.18828	2.81166	2.44933	10.4412	10.3669	4.39748	3.32859	1.17667	0.115451	7.25898	7.19657	5.33338	5.19395	6.15744	6.13421
ENSBTAG00000004022	PLAG1	0	0	1	1	2.7481	1.56028	3.19257	2.91815	3.73602	3.63539	2.68095	2.37045	1.27482	0.733942	2.89825	2.77053	5.10571	4.92931	3.509	3.21929
ENSBTAG00000004037	JUN	0	0	1	0	6.70876	6.59886	8.21077	7.8675	5.75819	5.76643	5.66412	5.24953	8.35088	8.15239	6.96032	6.79432	6.68917	6.2302	6.60173	6.29962
ENSBTAG00000004040	UGT2A3	1	0	0	0	7.70746	5.35565	2.79291	4.94769	1.39633	1.40328	14.4142	14.3167	4.43865	2.58723	2.54042	3.7062	4.23398	2.1936	6.71819	4.17023
ENSBTAG00000004052	EPGN	1	0	0	0	6.2481	4.78307	2.82748	0.156281	6.83915	6.60766	4.91822	4.78462	3.30007	4.08047	6.71626	6.15756	8.21168	8.25201	5.46301	6.18849
ENSBTAG00000004081	FAT3	0	0	0	1	5.4162	4.89954	1.00275	1.04304	8.43596	8.4372	1.41166	1.15811	1.88062	2.22414	7.2756	7.6395	8.02478	7.78638	7.37729	7.61104
ENSBTAG00000004086	SPINT1	1	0	0	0	10.787	11.1432	3.18832	1.43975	5.14436	5.13918	5.88175	5.44704	2.60961	2.19912	6.27623	6.23201	11.0512	11.0076	9.86508	8.99124
ENSBTAG00000004088	CRYBB2	1	0	0	0	4.67414	2.31709	2.90029	3.53345	6.77867	6.45786	0.308699	0.11554	2.23888	2.74905	5.34722	6.38174	8.10909	5.78337	3.67391	0.82311
ENSBTAG00000004095	FAM166A	1	0	0	0	4.23111	3.75508	3.85461	5.23109	3.24287	3.04023	1.38366	2.54566	4.42101	6.52461	2.04178	2.38132	0.109983	2.06454	4.25064	6.0667
ENSBTAG00000004104	RUNX2	0	0	1	0	3.01362	3.13548	4.28484	4.41142	2.25294	2.23584	2.18194	2.20184	1.16367	1.06487	4.54537	4.76138	0.713832	0.739653	2.5642	2.91749
ENSBTAG00000004117	AZI2	0	0	0	1	4.05743	4.23061	3.94252	3.93601	3.52802	3.57218	3.66738	3.6393	2.67822	2.75445	4.05938	4.0193	3.92936	3.9442	4.05009	4.06359
ENSBTAG00000004119	NEUROD2	1	1	1	0	0.0689083	0.116157	1.1218	0.617204	3.3194	5.77609	0.647763	0.716284	0.848928	0.917449	0.0553675	0.123889	0.145862	0.235179	1.02225	0.465769
ENSBTAG00000004129	CCL11	0	1	0	0	8.91856	6.045	3.67429	3.80047	1.5374	2.43958	0.648613	1.50687	3.04889	2.36661	2.57794	4.11539	2.95132	4.88206	12.2239	12.9592
ENSBTAG00000004145	ANO4	0	1	0	0	10.232	9.10123	3.00123	2.80351	11.1119	11.2146	0.633914	1.86611	2.69252	3.22768	12.3245	11.9783	5.73538	6.08097	9.96404	9.50981
ENSBTAG00000004148	SLPI	1	1	0	0	4.0746	9.18376	10.7329	9.07952	0.467074	2.42474	0.209859	0.422886	4.95989	2.08128	0.812799	3.56183	0.161838	1.29739	2.76664	2.94718
ENSBTAG00000004153	SCGB3A2	1	1	0	0	4.50653	1.30944	0.302839	0.113261	0.542994	1.27853	0.672059	0.482481	0.873224	0.683646	6.63635	8.12628	4.2222	5.77536	7.66309	2.35158
ENSBTAG00000004175	HPD	1	0	0	0	5.77505	4.91247	7.26004	9.46178	6.19998	6.40467	17.7813	18.0192	8.48868	8.12658	3.79462	6.3561	6.4262	5.00916	7.58981	7.58965
ENSBTAG00000004176	PDC	1	0	0	0	2.23003	1.10556	2.89649	3.12459	4.88278	3.83221	2.04885	4.46016	0.92349	1.08186	5.60455	5.71555	4.58495	4.03437	2.10718	2.74235
ENSBTAG00000004221	ESM1	1	0	0	0	6.8416	6.67263	4.41815	3.58941	3.77152	5.11452	3.46171	3.34684	4.76969	5.09295	7.9615	9.64639	7.68903	7.46452	6.925	6.29795
ENSBTAG00000004232	TMIE	1	0	0	0	4.47056	9.25521	3.39486	2.206	9.24528	10.467	0.112976	1.2914	1.97313	3.40496	8.97105	9.6699	11.2566	11.8067	3.971	7.2096
ENSBTAG00000004270	FCER2	1	0	0	0	5.19486	6.43847	5.36629	6.36895	2.81822	4.79692	5.96008	7.1796	2.94406	4.28106	5.8139	6.25626	3.86893	4.7272	5.03369	5.96346
ENSBTAG00000004272	ISG12(B)	1	0	0	0	5.9375	4.34495	8.00271	8.21523	2.65792	0.818635	7.60479	7.3673	2.92781	2.34671	8.85546	8.62384	3.9561	4.66365	5.73363	4.66056
ENSBTAG00000004293	CLEC12B	1	1	0	0	0.0971533	0.216082	2.75893	2.12781	1.76925	2.57344	0.685034	0.802743	0.886199	1.00391	4.87275	7.07497	0.21864	0.295743	0.139929	0.257637
ENSBTAG00000004313	HOXD13	1	1	1	0	4.98993	5.94672	4.15198	2.40248	0.111113	0.05809	0.676227	0.623205	0.877393	0.82437	0.0838325	0.03081	0.209157	0.13452	0.131117	0.078095
ENSBTAG00000004351	IL31RA	1	0	0	0	6.25774	9.88046	1.74269	2.82995	3.16095	4.17334	10.4364	10.5803	0.564854	0.850835	5.67188	6.21423	2.23286	1.03245	5.98485	8.875
ENSBTAG00000004352	SLC5A7	0	1	0	0	1.01787	0.387225	0.0480338	0.245649	10.5545	10.8505	0.947189	2.2691	0.859244	1.56779	0.0428837	0.703054	3.80129	5.24301	0.206359	1.11303
ENSBTAG00000004355	ROBO3	0	1	0	0	6.75702	4.18091	9.904	9.02631	4.55704	4.55504	1.79365	0.909996	5.14579	3.84639	4.19067	3.74432	2.86239	2.07654	4.88848	2.47245
ENSBTAG00000004362	SERPINC1	1	0	0	0	10.1988	10.351	9.71326	11.0892	8.03093	8.1706	19.7331	19.7305	9.33808	7.49937	10.2896	10.505	9.60511	9.51714	10.1537	9.86014
ENSBTAG00000004381	TACSTD2	1	0	0	0	10.7674	10.9052	6.15172	4.51513	3.04149	1.26363	1.26185	1.46406	3.782	3.47554	7.45634	6.38189	11.0671	10.4941	8.76858	6.19896
ENSBTAG00000004384	APOF	1	1	0	0	2.5766	2.60617	2.85443	5.95599	1.67688	2.72494	15.456	15.5811	5.0052	3.17634	1.87997	3.88333	3.49499	2.11883	4.85136	4.42778
ENSBTAG00000004429	GDF5	1	1	0	0	6.05644	4.66786	9.48507	9.68969	2.2664	2.27293	0.333522	0.167249	2.19872	1.71134	7.42616	7.68154	3.6892	1.78658	5.30735	4.00007
ENSBTAG00000004462	NPAS3	0	0	1	0	7.54615	6.74139	7.94197	8.01435	9.90387	10.1867	1.17177	2.41316	4.97811	4.05987	5.40289	4.60246	4.71078	4.95212	8.32675	8.10933
ENSBTAG00000004503	NPY	1	0	0	0	12.0329	9.95417	0.785367	2.53462	11.3072	10.7554	0.241507	0.0535925	1.82583	1.66468	3.95622	2.97851	5.9214	4.39132	9.49098	7.71629
ENSBTAG00000004507	FAM163B	1	0	0	0	0.167057	1.51864	1.78358	2.99371	13.6341	13.8354	6.24937	7.63352	1.18453	3.0607	3.8638	5.94121	7.77984	7.97164	0.878406	0.369014
ENSBTAG00000004517	TARBP1	0	0	0	1	3.08794	3.24522	2.76046	2.95092	2.85767	2.7066	1.94616	2.11175	2.34219	2.52391	2.79293	2.95466	3.35359	3.50443	3.15653	3.28516
ENSBTAG00000004547	OLR1	1	0	0	0	5.75311	5.21496	6.74234	6.44742	2.62245	0.790162	7.36545	7.21074	2.95919	3.71935	10.2321	9.98206	7.51451	7.27386	6.30241	6.55369
ENSBTAG00000004555	LRP2	1	0	0	0	6.95495	12.6751	2.10291	1.78968	3.57498	5.0571	3.93014	4.56625	2.54274	3.19913	5.05525	5.45779	3.23948	4.80799	5.51197	9.76974
ENSBTAG00000004557	DHRS9	1	0	0	0	4.77805	5.14661	8.57757	8.1771	3.79523	5.01425	2.80423	4.73418	4.31437	4.44989	5.83732	6.10182	1.10721	1.57206	5.12883	5.17615
ENSBTAG00000004561	PAX6	0	0	1	1	0.123512	0.10084	4.91246	4.56831	11.8186	12.1168	2.66082	1.99176	2.57953	3.2345	4.65656	4.89944	11.7728	11.658	3.39705	1.88892
ENSBTAG00000004595	GML	1	0	0	0	3.42133	7.87731	1.80193	3.17027	4.17515	6.79586	0.290365	1.51577	1.53469	2.03638	2.71991	3.48502	4.3449	7.07641	1.43882	2.73697
ENSBTAG00000004596	CYP11B1	1	0	0	0	1.29082	1.30928	1.14212	1.16689	8.88678	8.65826	0.322639	0.35353	2.2528	1.10858	0.88058	3.35199	2.18574	2.46139	0.742724	0.117625
ENSBTAG00000004602	PITX1	1	1	1	0	4.41942	3.57807	7.8461	6.46131	1.89526	5.30548	3.10465	3.61312	7.55026	7.31189	8.77262	8.96971	14.1665	14.413	0.828742	1.81299
ENSBTAG00000004612	SORCS3	0	0	0	1	6.53246	6.26037	2.72536	1.62101	9.22997	9.45892	1.36757	2.14853	4.78878	4.73342	4.54849	4.44668	4.37814	4.56787	8.18576	8.78118
ENSBTAG00000004629	SLC9A3	1	0	0	0	5.23231	4.51545	2.79229	1.54946	7.67861	7.56041	1.08653	0.571931	1.78108	2.45523	2.06808	2.25725	4.31867	3.27125	5.52229	2.58189
ENSBTAG00000004647	UCP1	1	1	0	0	0.355042	1.84788	9.6154	7.64469	5.90117	5.7987	2.12218	3.53519	0.84785	1.65848	2.03297	1.63875	6.21522	6.98202	0.047175	0.742382
ENSBTAG00000004662	SLC16A12	1	0	0	0	3.46165	5.69285	9.46862	9.36162	5.75135	5.94925	13.4956	13.4483	6.78591	6.88084	9.14489	10.4886	10.7981	10.5263	4.93035	5.74775
ENSBTAG00000004680	SLC13A5	1	0	0	0	5.61788	9.52685	2.66868	3.07311	6.23175	6.6846	7.85485	7.44536	1.706	1.65107	1.61048	2.33876	1.81003	2.41351	5.05725	7.78442
ENSBTAG00000004690	CD300E	1	0	0	0	6.84026	5.05442	8.72806	9.18397	0.176602	2.57996	3.88446	3.37838	4.88993	5.72954	7.61532	8.43719	3.27584	6.58296	6.83223	7.0925
ENSBTAG00000004705	ILDR1	1	0	0	0	9.93895	10.8963	2.59176	0.621506	1.67674	3.68244	5.32425	5.5807	2.56468	2.39425	5.33073	4.95872	11.0439	11.0276	9.40082	9.07991
ENSBTAG00000004710	HNF1B	1	1	0	0	11.368	12.2205	1.56112	1.00601	2.47621	4.49501	8.14822	7.82054	1.83447	1.6104	6.17105	5.25847	4.82188	4.72426	10.175	9.80565
ENSBTAG00000004712	MC3R	1	0	0	0	1.15003	0.325433	3.60165	3.09314	7.79888	8.67699	3.43375	3.59398	0.492166	0.627104	5.28421	7.47077	0.820442	2.81333	0.749981	0.202489
ENSBTAG00000004723	TEX2	0	0	0	1	3.33872	3.59499	4.55243	4.67227	5.23486	5.29638	3.18785	3.22134	5.84769	5.93086	3.52381	3.47845	3.88223	3.88021	3.21233	3.08281
ENSBTAG00000004725	NLRP9	0	1	0	0	0.320787	1.03322	0.796065	0.435341	0.24195	0.769497	0.576875	0.616061	0.989258	1.47656	6.4042	6.03636	0.09695	0.125546	0.03177	0.0709562
ENSBTAG00000004732	SPTB	0	1	0	0	0.854417	2.28673	1.26968	1.67429	4.05354	3.90607	3.60524	3.6289	7.81502	7.91845	0.725641	1.13716	4.7968	5.08033	0.366631	0.560074
ENSBTAG00000004741	IL12B	1	0	0	0	2.90211	2.9708	0.171206	1.90769	5.22404	6.2913	4.59884	4.49894	1.7316	2.90494	3.66474	4.36707	0.387002	2.71787	2.90681	1.68931
ENSBTAG00000004742	RUNX1	0	0	1	0	2.33597	1.63566	1.54853	1.42387	1.793	1.97027	2.4578	2.34058	2.22763	1.52281	4.13614	3.92138	3.04426	2.92426	1.01975	1.23734
ENSBTAG00000004770	SCN4A	0	1	0	0	1.77716	3.21686	4.43248	5.21111	3.36521	3.87904	3.24132	3.19825	13.1735	13.5347	3.07843	3.67881	6.37838	6.26442	1.35427	2.21276
ENSBTAG00000004789	LGR6	1	0	0	0	6.37894	6.47233	3.99489	2.33894	9.20146	9.06595	0.68868	2.25371	4.53896	4.24848	6.64208	6.99018	7.37389	7.08871	5.72161	5.66908
ENSBTAG00000004796	GRP	0	1	0	0	12.7284	12.4764	7.16901	7.38277	2.52926	2.50243	2.49817	2.19508	3.63993	3.32683	2.27308	1.64041	0.93423	2.50859	11.1456	9.80936
ENSBTAG00000004835	HOXD3	1	0	1	0	11.4086	10.995	10.1529	10.3104	1.35872	2.3054	3.88374	2.35968	10.3768	10.408	10.9986	10.9759	1.72892	3.80635	11.4215	11.4138
ENSBTAG00000004856	RNF130	0	0	0	1	8.77801	9.02099	8.76645	8.75556	10.0408	10.2002	9.46126	9.61679	8.92084	8.95019	8.68736	8.68052	8.94924	8.94601	8.79892	9.0975
ENSBTAG00000004860	SLC27A6	1	0	0	0	7.22156	10.8576	7.66942	8.66106	10.9235	11.2944	10.208	10.3777	9.48837	9.82538	4.10609	4.72971	2.87262	3.78669	5.65701	7.85088
ENSBTAG00000004886	ZAR1	0	1	0	0	0.0830983	0.938683	1.0105	1.02662	6.91506	6.27934	0.538465	1.10034	0.462685	0.437005	7.52959	6.85344	2.24542	3.14572	1.6479	0.309485
ENSBTAG00000004891	OXNAD1	0	0	0	1	2.16778	2.42156	2.47688	2.35142	2.29618	2.25568	2.03023	1.9102	0.875564	0.834764	2.32091	2.20892	1.82837	1.85568	2.0914	2.02163
ENSBTAG00000004903	KRT15	0	1	0	0	1.04639	0.218037	0.0829063	0.0686237	4.01053	2.54044	0.452121	0.437839	0.912076	1.44683	5.00118	6.17096	9.00991	8.94646	1.06131	1.01923
ENSBTAG00000004924	PENK	1	0	0	1	12.0669	16.1223	7.65395	7.53477	13.9895	14.6091	4.77694	7.20509	7.98827	8.5664	10.9341	11.5417	6.24086	8.42385	11.9468	15.8685
ENSBTAG00000004941	TEX35	0	1	0	0	0.0757133	0.05463	11.5378	11.4338	4.27782	4.15759	0.967889	1.61093	2.36327	1.31044	2.45854	1.84797	0.576395	1.26639	0.107129	0.0804788
ENSBTAG00000004944	ANXA10	1	1	0	0	8.5321	5.61342	1.57225	0.553172	1.70107	0.461303	1.14659	0.667747	1.34775	0.868912	0.554195	0.0753575	1.84577	0.564858	7.30017	2.26857
ENSBTAG00000004954	TOX	0	0	1	1	5.16119	4.78298	1.02767	1.12405	5.09575	5.34836	1.80081	1.51204	0.353996	1.19517	5.18497	5.07299	5.96271	5.93241	5.08647	4.8713
ENSBTAG00000005004	GDF2	1	0	0	0	3.91209	4.95695	3.99182	5.04686	7.26741	7.56859	13.2765	13.5518	0.752756	1.74421	1.18349	2.15135	0.103143	1.04509	2.40229	5.9738
ENSBTAG00000005019	PRSS50	1	0	0	0	5.32478	6.45563	2.09522	1.46726	1.34931	3.31512	2.84146	3.70507	0.343993	1.17228	7.28917	7.30769	0.926552	1.07371	2.75155	4.68012
ENSBTAG00000005029	TAL1	0	0	1	0	1.06189	0.855817	2.79555	2.78271	1.62414	1.54848	1.38391	1.35803	1.21463	0.946784	1.93554	2.06295	0.45565	0.295722	1.17252	1.57131
ENSBTAG00000005048	DHRS7C	1	1	0	0	1.47085	3.83536	4.3644	3.80986	1.98146	4.12756	5.06265	5.16513	15.7383	15.7242	4.52696	3.31126	4.69164	5.26457	3.48964	3.37203
ENSBTAG00000005052	GLP2R	1	0	0	0	4.85367	5.54519	7.29996	7.76742	2.28578	4.01176	9.91028	10.2241	1.55983	4.16318	6.53735	6.26255	2.42534	2.14731	4.15815	4.9276
ENSBTAG00000005068	COMMD2	0	0	0	1	2.68641	2.52026	2.55978	2.37959	2.25736	2.36634	1.241	1.3351	1.23783	1.36021	2.99297	2.90184	2.61766	2.60186	3.10188	3.1031
ENSBTAG00000005085	TRIM63	0	1	0	0	8.05827	6.04944	6.02385	5.60479	2.47574	3.52286	3.24534	4.042	15.1166	15.1021	6.95828	6.8422	4.5604	4.77246	8.96237	8.75377
ENSBTAG00000005103	FEZF1	1	0	0	0	0.828388	2.68606	1.10959	0.712599	5.82615	9.33112	0.63555	0.811679	1.70121	1.28979	0.28884	0.986208	4.22611	3.38064	0.090445	0.266574
ENSBTAG00000005115	SLC31A2	0	0	0	1	3.34988	4.93401	3.31829	3.29702	1.56871	1.42994	2.21784	2.19871	3.58628	3.44243	3.17167	3.24495	3.26268	3.08832	2.52958	3.37106
ENSBTAG00000005122	KNG1	1	0	0	0	5.91446	6.07162	5.53913	8.14489	6.24396	6.40606	17.4845	17.53	7.21764	6.18496	4.10731	6.11878	5.68015	3.49178	7.14844	7.09211
ENSBTAG00000005128	VPREB3	1	0	0	0	3.03995	5.54813	0.96001	1.3541	0.1735	2.67547	4.30668	2.64535	0.71378	2.7363	3.90478	5.99913	6.24713	6.16344	1.42488	2.92143
ENSBTAG00000005136	ABI1	0	0	0	1	2.63066	2.6374	2.80348	2.67671	2.85302	2.89499	2.01096	2.00897	2.08888	2.06653	2.73169	2.74253	2.74893	2.63313	2.70091	2.68968
ENSBTAG00000005148	PTX4	0	1	0	0	0.033345	0.174287	0.255818	0.397699	0.413437	1.30532	0.625038	0.766919	2.50056	3.77307	0.0326425	0.174524	0.119307	0.278619	0.366152	1.11528
ENSBTAG00000005162	STX19	0	1	0	0	9.03739	10.3806	1.25142	1.46539	0.843304	0.114709	1.65277	1.75569	0.805813	1.46315	2.02706	1.49698	7.17255	7.24634	8.06565	7.834
ENSBTAG00000005164	GZMK	1	0	0	0	7.87606	7.60327	4.74589	5.74717	0.034835	2.25879	5.99994	7.21232	0.702325	2.71669	8.48631	8.81062	5.56978	5.91054	4.7669	6.71325
ENSBTAG00000005180	RBMS1	0	0	0	1	3.65867	3.10832	5.4451	5.39344	2.57821	2.5107	3.75501	3.66413	3.58723	3.59669	4.55134	4.44909	3.3074	3.19868	4.08169	4.06668
ENSBTAG00000005219	KLHL4	1	0	0	0	5.4252	4.44885	5.84339	6.17151	5.03147	5.248	2.36456	3.93689	4.48713	4.57524	7.60952	7.7952	4.49562	4.58321	6.1954	6.74606
ENSBTAG00000005227	ATF6	0	0	1	0	2.64123	2.66275	2.5888	2.64278	2.52239	2.71402	3.60097	3.59814	2.05795	2.16317	2.76778	2.87951	3.32686	3.35329	2.69773	2.50122
ENSBTAG00000005228	CNGA4	1	1	0	0	7.98295	6.17281	0.362946	0.06039	0.447201	0.739005	0.732166	0.42961	0.933333	0.630775	2.82278	1.50657	1.92244	1.23023	6.45481	2.6491
ENSBTAG00000005235	DPP10	0	0	0	1	5.95139	7.25038	4.9469	4.18971	10.5842	10.6145	4.49024	3.528	2.42986	2.03662	2.93153	3.44365	7.35485	7.42231	5.86303	5.08249
ENSBTAG00000005247	FRMD3	0	1	0	0	0.905276	0.70769	1.59299	1.73616	1.21689	1.31968	0.554429	0.614302	4.4182	4.37567	0.93419	0.696367	0.507697	0.345421	1.86415	1.87978
ENSBTAG00000005259	UCP3	1	1	0	0	2.27236	4.76346	5.25759	3.17509	1.96361	3.19843	4.38264	4.16849	16.6989	16.7963	5.83462	4.77827	7.16794	6.98096	3.65934	3.70485
ENSBTAG00000005268	PLA2G4D	0	0	0	1	5.66977	7.07623	2.57324	2.21729	1.99611	1.87123	0.607929	0.505614	3.28245	2.10986	8.16682	7.35896	0.0970067	0.0657487	6.65714	5.74859
ENSBTAG00000005287	CYP7A1	1	0	0	0	6.5724	3.75222	2.16683	5.03596	0.719601	0.632572	13.4138	13.8352	1.69757	1.48499	3.6303	3.86419	3.84007	2.45002	7.03845	5.72424
ENSBTAG00000005290	CLDN2	1	0	0	0	4.42967	2.17502	1.0569	3.35165	2.31708	1.09882	12.3355	12.5979	0.803902	1.19743	1.34926	2.0325	4.23845	1.29572	4.20567	3.39978
ENSBTAG00000005306	TRH	1	0	0	0	1.29253	2.61862	4.96235	3.952	10.4591	12.2759	0.0842462	1.58742	1.3775	2.45578	4.27951	3.66086	2.7999	3.55061	1.68839	2.06239
ENSBTAG00000005308	ANGPTL5	0	1	0	0	2.83265	2.45195	7.54319	7.38636	3.01504	2.31868	0.888861	1.41329	8.00664	8.34897	10.4248	10.2528	5.21962	6.0794	4.65738	5.37422
ENSBTAG00000005330	KRTDAP	1	1	0	0	0.59137	2.11655	0.240767	0.502311	0.436318	1.52834	0.609982	0.871526	0.811148	1.07269	0.0175875	0.279131	0.10839	0.368011	1.39108	4.46625
ENSBTAG00000005333	MB	0	1	0	0	3.85152	4.50286	4.1965	2.70803	2.24224	3.50579	3.22672	3.25055	15.2862	15.2142	4.63346	4.09395	4.56609	4.70026	4.54193	4.51124
ENSBTAG00000005363	GGN	1	0	0	0	5.53272	5.34242	3.72689	4.26164	5.79891	6.08337	0.0588788	1.14843	3.44288	2.45866	4.39839	5.19996	5.89553	5.89923	5.04126	5.41673
ENSBTAG00000005386	SLC2A2	1	1	0	0	2.51284	2.73683	3.23402	5.69753	2.97984	1.8193	15.4796	15.2102	4.75835	4.10482	0.816717	2.52248	4.02774	2.21989	4.81367	3.95645
ENSBTAG00000005396	XKR6	1	0	0	0	4.39925	4.17491	3.80753	4.75364	7.93181	8.29996	1.38062	3.69008	0.681596	1.03615	2.49036	4.16049	5.78154	5.67205	4.02794	4.85945
ENSBTAG00000005410	RGS7	0	0	0	1	8.93044	8.28752	9.35424	9.10892	11.4643	11.6498	5.20057	6.23138	5.4208	6.56661	10.3221	10.4243	10.7872	10.9317	9.58042	9.481
ENSBTAG00000005425	GATA4	0	1	1	0	4.05018	3.42632	2.66345	4.54388	1.20671	2.59707	11.3355	11.5062	2.76538	2.54024	13.2929	13.3294	1.61089	2.82901	2.10736	2.43504
ENSBTAG00000005450	CYP3A5	1	0	0	0	6.97177	5.62776	9.26725	11.1469	5.35099	4.74107	18.8329	18.864	8.85521	7.60109	6.59522	7.74404	7.99598	7.13422	8.53548	8.47385
ENSBTAG00000005470	BIN3	0	0	0	1	2.54365	2.60023	3.17386	3.24326	1.30477	1.2287	3.23911	3.16788	1.0499	1.05171	2.36018	2.28657	1.88783	1.73848	2.22479	2.10715
ENSBTAG00000005471	RHCG	1	0	0	0	9.43759	5.91659	0.994485	1.85629	7.33174	6.73678	1.49934	0.594556	0.915075	0.570591	5.26333	4.42423	4.88127	4.07495	9.34567	6.53043
ENSBTAG00000005474	CREB1	0	0	1	0	1.88654	1.86472	1.37384	1.51353	1.66264	1.64682	0.72158	0.677916	0.206871	0.527121	1.9683	1.95404	2.11468	1.97515	2.10761	1.89945
ENSBTAG00000005499	ZPBP	0	0	0	1	5.19407	5.2757	6.85498	7.25311	3.29741	4.48731	2.8216	3.52221	1.61412	2.40016	4.72973	5.24832	5.22421	5.95926	5.28828	5.75229
ENSBTAG00000005524	HBP1	0	0	1	0	6.10545	6.3001	6.28168	6.33817	4.35986	4.33291	5.82089	5.78983	6.30128	6.33721	5.90888	5.79534	5.07253	5.16672	5.88603	6.12869
ENSBTAG00000005525	LHX6	1	0	1	0	7.10352	6.42121	9.49975	9.58749	6.75059	6.95289	7.53396	7.53948	7.32804	7.35665	8.83519	8.74221	3.4708	1.8456	6.46286	6.74717
ENSBTAG00000005527	GIPR	0	1	0	0	6.35561	5.52669	10.8041	10.949	4.54337	3.30764	2.4207	3.58278	2.30972	1.8577	2.90471	1.48138	0.99649	2.07736	4.47489	3.4413
ENSBTAG00000005534	ENO3	0	1	0	0	2.20993	2.08613	2.87748	2.72716	1.80456	2.10673	2.1921	2.20167	11.7905	11.7872	2.33663	2.27308	2.3445	2.35174	2.35348	2.24554
ENSBTAG00000005546	HOXB7	0	1	1	0	12.9723	13.5207	11.6611	11.8543	1.17104	1.92686	1.41984	1.51042	8.95638	9.08403	7.56147	7.06652	1.14001	0.971753	12.3553	12.0565
ENSBTAG00000005562	GALNT13	0	0	0	1	1.19975	2.01075	4.88273	3.86684	12.1943	12.0697	3.19062	3.8818	2.16852	1.40563	9.72368	10.0489	12.5222	12.569	3.69935	3.40658
ENSBTAG00000005568	FRMPD2	1	0	0	0	9.16233	9.26766	1.2094	1.11855	7.42825	7.93868	1.24448	0.103298	0.36457	1.04261	5.2386	2.8475	5.48475	5.88749	8.20614	6.5497
ENSBTAG00000005603	CXCL11	1	0	0	0	8.11477	5.24392	1.12134	2.07685	3.26241	3.8191	6.77996	4.38495	3.64049	3.50611	9.42605	9.07153	6.98032	5.86756	8.37915	8.72829
ENSBTAG00000005604	POPDC2	1	0	0	0	6.93274	5.48675	3.82384	2.19571	3.18975	2.85279	2.05176	0.872726	10.1977	10.0984	4.33489	3.31741	1.14833	2.13536	7.10081	7.71871
ENSBTAG00000005606	HOXC9	0	1	1	0	7.4212	6.18338	12.2811	12.0951	1.74777	1.14	0.432639	1.73676	12.5046	12.494	10.2682	9.48324	1.11348	1.01352	9.30597	8.58815
ENSBTAG00000005616	BRS3	1	0	0	0	2.11025	3.09197	0.223779	0.418857	6.25393	8.35307	0.592999	0.788077	1.72192	1.28644	2.50215	2.76495	4.8413	5.89932	2.81974	3.6201
ENSBTAG00000005624	F1N276	0	1	0	0	3.97568	2.52373	0.183541	0.205021	0.320176	1.04714	0.552761	0.574241	0.753926	0.775406	2.96126	2.98053	0.0997567	0.0694712	3.22801	3.91161
ENSBTAG00000005626	NEUROD4	0	1	1	0	0.035325	0.171535	1.15782	0.666504	0.35774	1.18345	3.12701	2.65184	2.4007	3.21198	5.64048	6.46364	14.4131	14.5444	0.77538	2.44471
ENSBTAG00000005648	POU4F2	0	1	1	1	1.53563	0.240563	1.18925	0.315491	2.69088	2.36974	0.495167	0.344081	0.696331	0.545246	0.211973	0.716875	1.3738	0.317236	0.965942	0.124411
ENSBTAG00000005666	LRRC20	0	1	0	0	0.67415	0.548189	1.36078	1.31784	1.33163	1.37072	2.33769	2.37317	5.58106	5.44642	0.288775	0.400015	0.577189	0.457002	0.764826	0.602169
ENSBTAG00000005675	SLC44A4	1	1	0	0	12.3415	12.644	3.74655	1.74816	3.87834	4.36364	5.48042	5.22617	1.4125	1.46299	6.29642	5.17378	6.56432	6.65335	10.8288	9.26856
ENSBTAG00000005685	HSD11B2	0	1	0	0	11.2472	11.4239	7.03423	6.62682	2.09499	2.05576	3.23618	2.95173	4.22872	4.62493	7.92613	7.54217	3.72283	2.95452	11.8363	11.1365
ENSBTAG00000005704	IL1RL2	1	0	0	0	6.09243	6.02969	5.53548	5.36402	0.689951	1.19398	1.81388	1.17168	2.86173	0.877637	4.68729	3.73988	0.381837	2.18473	5.43684	5.2627
ENSBTAG00000005708	KIF20B	0	0	0	1	3.52143	2.7865	2.74141	2.60496	1.30672	0.938749	3.19104	3.2662	0.940849	0.935843	4.02166	3.9086	2.84389	2.75083	3.69138	3.02516
ENSBTAG00000005710	NCAM1	0	0	0	1	6.40552	5.49372	4.81489	4.4401	10.2446	10.4023	0.841661	1.17094	5.30781	5.24467	7.03692	7.00853	7.28137	7.30544	6.6848	5.6822
ENSBTAG00000005717	GJB5	1	0	0	0	9.21739	12.8587	2.9625	2.1061	4.74856	5.25428	0.872027	2.76154	3.60976	4.19138	10.2322	10.7761	4.28317	4.27181	9.15647	11.5038
ENSBTAG00000005719	GJB4	1	0	0	0	6.58678	9.97612	4.55066	5.40329	0.0790837	2.68229	3.08057	2.86626	3.53882	3.18662	5.00304	5.71606	5.71832	6.59718	5.54856	8.4498
ENSBTAG00000005725	IDO2	1	0	0	0	8.51755	8.51122	4.76415	5.68663	3.35896	4.18769	14.086	13.7618	1.62465	0.983955	2.49768	2.94958	4.07936	1.87108	7.52676	6.85095
ENSBTAG00000005741	DLX2	1	0	1	0	1.7783	6.23476	1.83866	3.08331	7.35432	9.5732	0.826297	1.9354	1.34072	3.11441	3.12676	5.10964	0.074695	0.511633	2.56397	3.21121
ENSBTAG00000005759	PLA2G2A	1	0	0	0	1.85158	0.289532	1.22342	1.92139	1.2695	2.25287	1.03682	0.449226	0.603536	1.49931	2.46564	2.62114	2.17251	3.76571	0.930315	0.96639
ENSBTAG00000005772	SPDYC	1	1	0	0	10.9465	13.0871	1.13456	0.342021	1.98198	4.52086	8.30833	8.75437	0.901704	2.74188	2.43223	2.68328	6.5838	7.58353	9.76561	9.59348
ENSBTAG00000005782	CTBS	0	1	0	0	8.96897	8.34066	2.85329	4.86428	2.4337	2.76846	0.746015	0.04593	1.19661	1.13685	3.37128	2.29593	5.66502	5.46869	8.80816	7.48828
ENSBTAG00000005797	AGXT	1	0	0	0	6.06261	5.21248	3.14575	4.46384	0.759686	1.49385	14.8254	14.7822	3.49828	2.77144	1.81089	3.58314	2.14996	0.863189	5.44378	3.02197
ENSBTAG00000005798	TRIM50	1	1	0	0	0.107735	0.0783883	1.68422	2.25078	1.91326	3.11302	0.680604	0.665119	2.04885	2.0066	9.1963	8.54456	2.53263	0.855609	0.135499	0.120014
ENSBTAG00000005800	GRIA1	1	0	0	0	4.25781	5.01935	4.81783	5.09854	12.7816	13.2616	1.22185	1.41285	2.76019	3.72441	6.8575	7.98026	5.1025	6.63098	5.93821	8.6801
ENSBTAG00000005816	ISGF3G	0	0	1	0	2.83823	2.85298	3.40103	3.14502	1.96705	1.99839	3.77285	3.49363	1.82771	1.81511	2.88601	2.72412	2.75106	2.31191	2.31512	2.5939
ENSBTAG00000005861	CCNT1	0	0	1	1	2.902	3.63799	2.28453	2.45615	1.70537	1.82492	2.35606	2.29778	2.21672	2.34118	2.56792	2.69783	2.98102	3.0495	2.76696	2.86353
ENSBTAG00000005877	FAM83A	1	1	0	0	1.79634	2.07983	2.93543	4.01804	2.44638	4.89012	0.89874	1.78252	2.44709	3.61304	10.111	10.3906	0.830617	2.39204	0.083495	0.39415
ENSBTAG00000005893	TMEM68	0	0	0	1	2.04217	2.13171	2.3387	2.42756	1.68129	1.68312	1.84348	1.84204	0.720504	0.671526	2.06742	2.03509	1.59395	1.57026	2.14525	2.24542
ENSBTAG00000005898	TGS1	0	0	0	1	2.61451	2.54899	2.57902	2.38906	1.92519	1.75904	1.48923	1.42598	1.56485	1.57993	2.62973	2.56087	2.47763	2.43706	2.72407	2.69387
ENSBTAG00000005938	BARHL2	0	1	1	0	1.3979	0.452197	3.70101	2.38684	9.90456	9.72527	0.687808	0.606405	0.888972	0.80757	1.54146	1.80493	9.03693	9.12901	0.142703	0.0613
ENSBTAG00000005946	USP13	0	1	0	0	1.35575	0.612305	0.721769	0.865405	2.30045	2.44363	0.414859	0.419718	7.00293	6.99112	2.14478	2.33782	3.07628	2.94565	1.88626	1.57674
ENSBTAG00000005950	GPR50	1	1	0	0	0.14283	0.46738	8.06618	8.29354	4.03925	7.67419	0.756153	0.997422	3.33783	2.68611	3.20044	3.956	0.296738	0.48119	2.99411	4.48447
ENSBTAG00000005973	OVGP1	1	0	1	0	1.84423	1.23668	1.52318	1.06032	2.19288	1.68281	0.93842	0.571797	0.821045	0.604726	4.22127	2.1202	2.47521	2.22978	1.95738	1.5754
ENSBTAG00000005984	DAAM1	0	0	0	1	2.32493	2.02915	2.18001	2.21009	2.17934	2.10063	2.31928	2.36922	1.34309	1.42528	2.16463	2.16747	2.42321	2.3757	2.56624	2.29784
ENSBTAG00000005996	LRRC18	0	1	0	0	0.131495	0.100545	1.42363	0.649909	3.82884	5.12252	0.72007	0.675464	0.921234	0.876629	1.31001	1.19783	6.74658	6.18166	1.41484	0.527554
ENSBTAG00000006030	MYOG	1	1	1	0	0.464873	1.35057	3.78603	1.28653	2.84296	3.6023	0.873808	1.36126	13.8149	13.8968	2.92675	0.85958	0.135572	0.044715	0.341803	0.857054
ENSBTAG00000006035	PPP1R1B	0	1	0	0	3.62678	4.55753	9.2349	9.09244	6.927	6.44756	0.297429	0.122375	3.47988	2.54838	3.33081	2.88881	1.16104	1.06387	3.35312	3.23861
ENSBTAG00000006036	ERP27	1	1	0	0	8.22422	8.5899	6.08456	6.98743	1.41515	3.56765	6.5126	7.02606	4.6982	5.95536	10.5344	11.3712	2.06213	1.08275	7.80756	7.43812
ENSBTAG00000006083	KLF1	1	0	1	0	5.29537	5.22264	6.41319	5.9815	4.04164	4.42909	4.99982	3.35129	1.96242	1.48706	5.28972	4.92114	3.18487	0.113819	4.56492	4.15071
ENSBTAG00000006110	MCTP1	1	0	0	0	8.3695	9.58275	9.49438	9.935	9.32473	9.56672	0.0591475	1.97873	5.23175	5.06684	5.35141	6.30601	7.17399	7.28442	6.0501	8.60774
ENSBTAG00000006121	SBK2	1	0	0	0	6.49018	5.88975	1.73066	0.991285	2.18043	0.779767	2.70532	2.48637	8.01821	7.09505	5.92888	3.38773	8.72994	8.57472	5.80658	3.74226
ENSBTAG00000006128	TCTEX1D4	1	1	0	0	6.9162	5.25473	0.527162	0.302886	0.331267	0.106991	1.56581	2.76177	2.15597	1.21234	1.92968	0.600501	0.416775	0.213281	4.08226	1.32222
ENSBTAG00000006147	GPR149	0	1	0	0	0.115267	0.12858	0.324956	0.333772	10.2742	10.1505	0.694171	0.702988	0.895336	0.904152	1.96333	1.5466	4.985	6.51718	1.07682	0.455093
ENSBTAG00000006173	CCDC116	1	0	0	0	3.29371	4.44176	2.53685	4.70491	9.92772	10.2459	0.103925	0.394415	4.10219	5.18089	2.39768	3.53228	5.25285	5.27811	4.69798	6.04525
ENSBTAG00000006174	TMEM212	1	1	0	0	11.2131	11.2179	3.1664	4.053	6.18748	8.30954	1.10419	0.35432	0.181889	0.195585	6.38978	6.44745	3.66764	3.29294	10.1622	8.49666
ENSBTAG00000006176	GRIA4	1	0	0	0	8.39362	6.76297	2.9245	3.51279	10.7736	10.9754	1.43123	2.63327	0.0304663	2.78069	6.86596	6.90443	8.25378	8.58182	10.1983	10.6692
ENSBTAG00000006179	DNAJB8	1	1	0	0	7.28213	3.84254	0.638773	0.317868	2.28016	1.96116	1.00799	0.687083	1.20915	0.888249	0.415598	0.0946925	0.550125	0.224793	6.7855	3.10826
ENSBTAG00000006194	FOSL1	1	0	1	0	4.32862	6.12577	7.72499	6.73767	5.45256	5.41422	1.62644	0.950924	7.52804	6.11675	7.64398	7.57498	6.72271	6.15746	4.6418	3.95545
ENSBTAG00000006221	GPR97	1	0	0	0	1.54125	1.40487	6.07834	6.24847	0.899214	1.15711	3.09218	3.44001	5.72341	4.53868	6.55436	7.08949	1.07342	0.193672	2.00425	4.19018
ENSBTAG00000006225	RPA2	0	0	0	1	3.3436	3.62483	3.18823	3.11007	2.61253	2.89181	2.33552	2.44209	3.33746	3.46178	3.57856	3.47	3.114	3.1347	3.31658	3.46184
ENSBTAG00000006243	GCNT7	0	1	0	0	0.106148	0.187893	5.38267	6.60893	0.146155	0.192566	0.71127	0.757681	0.912435	0.958846	0.373515	0.960166	3.00475	1.99176	0.16616	0.212571
ENSBTAG00000006261	GPR17	0	1	0	0	0.038765	0.0852633	0.265835	0.28914	8.73353	9.1715	0.885335	1.43963	0.83622	0.859525	0.04266	0.065965	0.151837	0.17313	0.871215	0.36353
ENSBTAG00000006293	PLAC1	0	1	0	0	1.39067	0.0264333	1.29883	1.01033	3.41186	3.93807	0.209838	0.0658525	0.411002	0.267018	8.16467	8.13213	1.44307	1.05065	5.43055	3.21136
ENSBTAG00000006295	TSHB	1	1	0	0	0.188548	3.04874	4.93816	2.44789	0.326793	3.27024	3.01566	3.5739	5.32969	5.41396	6.19156	6.70902	17.344	17.7677	2.48888	3.19993
ENSBTAG00000006304	PAG6	0	1	0	0	0.0595083	0.0922167	0.27301	0.300821	1.48448	1.39543	0.64223	0.670041	1.74586	1.16031	1.92199	3.34574	11.2338	10.8999	0.09712	0.124931
ENSBTAG00000006335	STAT6	0	0	1	0	4.36217	4.43303	5.07515	5.10422	1.96989	2.11433	3.87798	3.97261	2.89179	2.90336	4.0391	3.89294	2.42088	2.39614	4.19323	4.33656
ENSBTAG00000006341	SLC35F4	0	1	0	0	0.956952	0.112372	1.23723	1.14344	8.74869	9.19265	1.17472	0.580935	1.40714	0.79211	2.72574	3.93983	9.81417	9.49235	1.08489	0.957456
ENSBTAG00000006345	ART1	0	1	0	0	4.1847	4.03427	3.77346	3.97101	1.48667	3.28804	3.06794	3.00101	11.7565	12.5243	2.09569	3.1136	5.01468	5.19682	3.39518	3.16802
ENSBTAG00000006352	MYT1	1	1	1	0	1.56509	4.05749	2.88407	1.16214	10.7289	10.9054	1.90927	2.15312	3.50413	1.78909	1.0747	3.19129	12.3469	12.4937	0.0603613	1.93744
ENSBTAG00000006354	HP	1	0	0	0	5.87057	5.42443	9.45477	10.1239	9.60244	10.0355	15.0322	14.3043	7.53514	6.05163	2.58409	5.01727	8.44691	8.42948	5.9513	5.56323
ENSBTAG00000006355	SLC30A2	0	1	0	0	6.59899	8.13868	5.43452	5.81022	4.08981	4.74838	4.99094	5.00265	2.66417	3.71946	10.201	10.1885	0.972787	0.767792	6.36185	7.00582
ENSBTAG00000006387	TSNAXIP1	1	0	0	0	10.0778	9.60656	2.9782	1.56726	6.5967	7.19221	2.84843	2.3046	2.99422	0.686321	6.68337	5.38489	7.03554	6.60924	8.95124	6.86651
ENSBTAG00000006419	TNNT1	0	1	0	0	10.2939	10.0613	9.19431	7.85508	11.6396	11.5423	7.02801	6.94124	20.0126	19.9391	11.2826	11.549	9.52113	9.54142	10.4831	10.2161
ENSBTAG00000006424	TNNI3	0	1	0	0	7.33893	6.68573	5.56386	6.15984	7.91918	7.59809	3.70752	2.9999	8.71571	8.49935	13.664	13.5858	4.63332	5.08315	7.86683	6.8621
ENSBTAG00000006428	ZNF354A	0	0	1	0	2.5066	2.61357	1.89854	2.02848	1.47093	1.26236	1.60968	1.64947	1.20851	1.36539	2.29731	2.37625	2.60497	2.713	2.5929	2.627
ENSBTAG00000006431	NEUROG3	0	1	1	0	0.0840967	0.107137	0.311446	0.324484	5.06835	5.3083	0.680661	0.693699	0.881826	0.894864	0.0882662	0.101304	0.190967	0.210229	0.135556	0.148594
ENSBTAG00000006438	ACTL8	0	1	0	0	3.10706	2.0305	5.2049	4.78258	4.3569	5.76678	0.148055	0.250186	7.85561	8.5756	2.69565	3.34872	2.42244	3.86803	1.90156	1.55849
ENSBTAG00000006451	GAP43	0	1	0	0	5.02547	5.22698	1.80247	2.49057	15.2445	15.6022	2.44996	2.2821	2.44847	3.80299	7.33789	7.37797	8.38576	8.97396	2.51497	1.8582
ENSBTAG00000006453	CD3G	1	0	0	0	8.94045	8.4494	8.05213	8.54489	3.81247	5.27626	9.17636	9.44849	6.2615	7.44941	9.02444	9.01269	6.91524	7.37258	8.90385	8.9196
ENSBTAG00000006472	GPR143	1	0	0	0	5.92424	4.82574	4.0994	4.6159	7.38275	7.4328	8.9506	9.02245	0.649722	2.71903	5.34331	5.23217	5.36403	5.11116	6.97075	5.89862
ENSBTAG00000006514	TRAV3	1	0	0	0	3.13337	0.385873	6.29781	6.53329	3.14764	3.07748	5.78827	6.8309	2.95623	2.10586	6.93	7.21582	2.63077	0.211724	5.2643	4.9439
ENSBTAG00000006525	FDXR	0	1	0	0	1.87364	2.16322	1.33566	1.20569	1.8716	1.89691	1.47689	1.50412	0.787223	1.01962	4.52595	4.96269	1.89843	1.86629	1.57967	1.56754
ENSBTAG00000006528	BBS9	0	0	0	1	2.21126	2.1252	2.28078	2.18603	2.36538	2.50283	0.250126	0.303287	1.5318	1.60916	2.41733	2.33572	3.58643	3.52634	2.10057	2.04002
ENSBTAG00000006535	IRS4	1	0	0	0	9.0668	6.21768	1.20936	1.67244	7.91052	9.3675	0.58528	1.02398	3.77305	2.74571	9.80433	9.13983	11.978	11.8283	11.0454	10.3042
ENSBTAG00000006538	PTHLH	1	0	0	0	10.1309	9.37969	9.30109	8.087	7.51401	7.1719	2.59577	1.36809	7.89488	7.75436	8.82836	10.1465	7.16253	7.33079	9.07502	7.53254
ENSBTAG00000006541	ATP2A1	0	1	0	0	1.99742	2.63047	2.43673	1.86646	1.72395	2.35352	1.75339	1.78822	12.9268	12.9377	2.73952	2.54603	3.28496	3.17137	2.35051	2.26104
ENSBTAG00000006557	RHEBL1	1	0	0	1	5.96491	6.28719	4.04864	5.16812	6.41877	6.266	5.70275	5.46356	4.23275	5.36622	4.86515	3.76133	3.73036	1.73917	5.34845	5.01855
ENSBTAG00000006563	KBTBD5	0	1	0	0	5.5173	6.01747	3.56793	3.69317	4.49529	5.20738	2.58554	3.09812	14.5172	14.1174	6.17934	6.21321	6.97741	7.02943	5.37466	5.35879
ENSBTAG00000006566	GPR43	1	0	0	0	4.16153	3.86162	7.18196	6.45396	0.229311	0.129634	5.62663	5.36202	2.71586	3.11878	6.51462	6.27817	2.82761	0.926409	4.87939	5.07542
ENSBTAG00000006582	SSTR1	1	0	0	0	6.74112	3.52434	5.88201	5.34615	8.98943	8.9985	3.80598	1.85847	2.54894	1.70555	6.78801	6.81515	7.25948	6.35186	6.21415	5.02927
ENSBTAG00000006599	INHBE	1	0	0	0	1.372	0.189287	4.16589	5.3325	0.578736	2.63622	14.741	14.4231	3.50353	4.03128	5.03422	5.80614	8.80909	8.50649	4.15782	1.93132
ENSBTAG00000006624	SLC36A3	1	0	0	0	5.00211	6.23194	1.227	1.68854	5.94995	6.01249	1.51042	1.74622	1.82614	2.30285	4.2448	4.63129	1.46879	3.3078	3.21686	5.47417
ENSBTAG00000006630	SLC12A3	1	0	0	0	5.30926	3.36241	1.3514	1.89151	7.7623	7.17096	0.41986	0.161853	6.29955	5.81907	5.62604	4.95239	2.21113	1.59428	4.83934	1.77812
ENSBTAG00000006631	GLI1	0	0	1	0	5.30684	5.40805	1.9807	1.88484	2.05246	2.29873	4.90444	4.31029	1.83673	1.60532	5.31192	5.18517	0.340597	0.330985	5.1586	5.31493
ENSBTAG00000006655	PIP	1	1	0	0	11.9746	14.9972	1.47853	0.706984	0.480788	2.88572	1.00159	3.31252	2.08779	2.4813	1.3679	1.83265	0.101118	1.432	11.049	13.1202
ENSBTAG00000006674	SLC13A1	0	1	0	0	0.0141767	0.189128	0.47661	1.19102	0.685395	2.25836	6.87409	7.01243	0.79235	0.966515	0.496965	1.72805	8.79233	8.9854	0.04608	0.220247
ENSBTAG00000006680	NKIRAS1	0	0	0	1	2.10581	2.27209	1.29973	1.20295	4.21499	4.19869	0.465861	0.659271	2.87175	2.79151	1.86659	1.87732	2.6672	2.58303	2.03054	2.07943
ENSBTAG00000006689	TECTB	0	1	0	0	2.16119	1.62274	9.23979	9.59596	0.0807237	0.731495	2.09824	3.001	3.44186	3.99584	4.51207	5.11939	0.206922	0.830784	1.06502	1.65578
ENSBTAG00000006692	IL19	1	1	0	0	8.18652	5.42006	1.77978	1.58224	0.268386	0.092605	0.833501	0.65772	1.03467	0.858885	4.46838	2.56535	0.348067	0.20341	7.90614	8.38375
ENSBTAG00000006709	NPPA	0	1	0	0	0.115815	0.36675	1.66976	2.06596	5.13411	6.66068	0.727937	0.918656	0.929102	1.11982	0.427437	1.23743	5.13565	6.65159	0.182833	0.373551
ENSBTAG00000006729	ARID5B	0	0	1	0	3.33632	3.67242	1.65479	1.38839	1.06999	1.20735	1.7043	1.46328	4.59573	4.00305	3.17821	2.83005	1.48592	1.54273	3.2637	3.33468
ENSBTAG00000006733	PPP1R3A	1	1	0	0	1.70699	4.22955	4.437	2.49966	2.23114	3.01548	3.67887	3.62791	15.7634	15.8708	4.73884	3.50746	5.0157	5.33515	3.31439	3.10888
ENSBTAG00000006735	STAC	1	0	0	0	7.81326	7.55067	9.76941	9.93736	7.07649	7.5552	1.86019	3.68176	7.89711	7.92277	6.25116	6.56704	7.38863	7.80068	8.79128	10.2542
ENSBTAG00000006739	KRT81	0	1	0	0	0.0389233	0.00713667	0.249362	0.229284	8.66908	8.84279	0.618578	0.598499	0.819743	0.799664	0.858151	0.272629	0.136688	0.116729	0.0734725	0.0533937
ENSBTAG00000006745	FGG	1	0	0	0	9.07718	9.215	12.2611	13.4318	6.82927	7.63745	21.05	21.1496	11.0752	9.75326	7.82486	10.8795	9.78127	8.33183	10.7337	10.5643
ENSBTAG00000006769	HSD3B	1	1	0	0	6.7334	5.29982	5.48191	6.73355	6.06392	5.13916	10.1719	10.0388	4.29011	3.89409	14.2814	15.7789	6.15491	5.68338	6.24126	5.4652
ENSBTAG00000006800	FGF6	0	1	0	0	0.0826967	0.08485	0.288166	0.312069	0.454606	1.24723	0.657381	0.681284	9.77471	10.2033	0.0649913	0.0888937	0.169238	0.199879	1.2507	0.500874
ENSBTAG00000006806	KRT17	1	0	0	0	8.19334	8.82757	3.03638	2.26747	2.56196	1.45602	0.859185	0.0648337	1.07076	0.269334	7.05882	6.51056	9.17069	7.05344	7.24479	7.13811
ENSBTAG00000006807	KRT35	0	1	0	0	0.0345683	0.075475	0.257285	0.284604	1.27099	1.38783	0.6265	0.653819	0.827665	0.854984	7.209	7.14367	0.436797	1.06923	0.081395	0.108714
ENSBTAG00000006820	FATE1	1	1	0	0	1.23952	1.39408	2.0945	1.64344	2.98885	0.509317	0.271301	0.918395	1.44032	1.3806	9.87732	9.39399	0.205785	1.44962	2.60444	3.34985
ENSBTAG00000006823	CMYA5	0	1	0	0	0.452835	0.930113	1.46449	0.993283	1.30019	1.34643	2.81102	2.5253	10.9934	11.139	1.46179	1.00899	1.36286	1.27494	1.29504	1.0113
ENSBTAG00000006835	MCAM	0	1	0	0	4.07026	3.42051	9.45311	9.59761	4.99348	5.31296	0.526155	0.575376	4.6785	4.63791	4.59484	4.59727	1.97949	2.04574	4.46136	4.57189
ENSBTAG00000006844	LEF1	0	0	1	0	7.9284	8.00456	3.76531	3.46896	6.93813	6.78588	4.49382	4.23292	2.65476	2.68247	5.90847	5.64717	1.63824	1.33359	7.364	6.80664
ENSBTAG00000006855	TDRD1	0	1	0	0	3.73833	3.71113	1.83162	1.79722	1.10135	2.15988	0.283026	0.312956	1.57278	2.06526	6.57447	5.74416	0.64609	0.0677062	3.03689	3.63812
ENSBTAG00000006861	C11H2orf73	1	0	0	0	6.95232	6.39397	4.87845	5.13148	8.9036	8.4323	1.02827	0.0917012	5.44777	3.77516	4.81288	2.30302	8.67149	8.54676	6.74549	6.00778
ENSBTAG00000006879	HOXC11	1	1	1	0	9.04914	8.496	6.58153	4.02157	0.27302	0.0924688	0.83813	0.657579	1.39412	1.96637	2.38266	0.749749	0.383467	0.187129	8.84368	8.91162
ENSBTAG00000006899	JPH3	1	0	0	0	7.29478	6.62302	0.535312	0.621551	12.7025	12.7161	1.01054	1.13488	1.65206	0.692354	1.36052	3.36961	10.5935	10.9176	9.42498	9.64583
ENSBTAG00000006902	KCNJ5	0	1	0	0	0.0838183	1.84422	2.80758	1.43108	9.12637	9.83653	1.10208	1.3258	4.14277	4.01589	3.91024	4.77464	13.1609	13.3243	1.54479	0.87896
ENSBTAG00000006907	NEB	0	1	0	0	1.91505	2.94191	2.61994	1.40011	2.31643	2.91185	2.19226	2.08161	13.4826	13.5709	3.23946	2.8359	2.74519	3.13501	2.74437	2.28297
ENSBTAG00000006919	SMAD4	0	0	1	0	4.46625	4.44516	4.50758	4.27089	3.0859	3.07159	3.72043	3.54835	4.60784	4.53611	5.1361	4.97722	4.17107	4.10767	4.61277	4.55372
ENSBTAG00000006934	CYP11A1	1	1	0	0	9.00767	8.98477	4.46677	6.82055	7.17091	6.96495	12.7651	12.8569	5.68805	5.60801	15.0715	16.3016	6.9854	6.46544	7.23076	6.07533
ENSBTAG00000006943	EFCAB3	1	0	0	0	3.50047	1.94216	3.19553	1.5831	0.999234	0.0581562	3.47171	1.93539	1.72613	0.811816	4.14632	2.18773	7.79653	7.53524	4.87897	4.74742
ENSBTAG00000006947	ROPN1	1	0	0	0	11.6913	11.1079	2.46638	1.39947	7.82328	8.09566	2.98749	1.95936	1.06818	1.51651	6.17677	2.52123	9.3493	9.09702	10.6655	7.90892
ENSBTAG00000006963	RPL12	1	0	0	0	8.91119	9.38786	8.57736	9.92755	7.44641	8.29182	8.07288	9.03633	7.80881	9.03649	8.99805	10.1794	8.45044	9.34086	9.09549	10.2307
ENSBTAG00000006965	NLRP8	0	1	0	0	0.0888483	0.802357	1.08464	1.73821	1.45592	1.67885	0.378746	0.428232	0.579911	0.629398	6.97904	6.6798	0.793867	0.189472	0.0579662	0.58337
ENSBTAG00000006986	ADH6	1	0	0	1	1.72598	6.37061	0.483156	1.96018	0.0815862	1.12225	10.4035	10.6331	2.36429	1.54177	0.426521	2.25687	1.06294	0.592715	1.24106	4.6992
ENSBTAG00000006988	C2orf65	1	0	0	0	6.56953	7.17377	6.23884	6.92187	1.93102	2.89922	8.45312	9.04696	3.04089	4.16839	5.5552	5.95383	2.37275	4.2863	6.64429	7.07995
ENSBTAG00000006991	ADH6	0	0	0	1	7.19894	6.79375	8.34529	9.46905	4.9402	5.33347	17.0543	17.2552	6.63852	5.16753	7.0722	8.01243	10.3711	10.1322	7.71375	8.06461
ENSBTAG00000006999	RYR1	0	1	0	0	2.14101	1.6638	1.41369	1.29565	3.4267	3.14173	0.954319	1.03631	10.7067	10.7522	1.81583	1.63875	1.41773	1.43236	2.52978	2.29362
ENSBTAG00000007011	TEX36	0	1	0	0	9.79271	7.37142	0.34509	0.318456	1.61422	1.59305	1.07043	1.79934	0.91547	0.888836	0.12191	0.0952763	1.04808	2.54715	10.8532	10.0597
ENSBTAG00000007041	SERPINA3-8	1	1	0	0	2.68945	2.58941	1.99491	5.21009	1.67365	1.85968	15.3794	15.2536	5.06288	3.05816	2.02477	2.75709	4.11169	2.41793	5.21521	4.6981
ENSBTAG00000007043	SERPINA3	1	1	0	0	4.98457	5.02608	3.61505	6.93895	2.22299	3.90053	16.7708	16.7595	6.09122	3.66787	2.9871	5.5542	5.17774	4.59022	6.35963	6.09299
ENSBTAG00000007049	MBL	1	1	0	0	3.50118	3.20147	3.28548	6.33726	2.82045	2.33072	16.2155	16.2741	5.8702	4.56228	2.32953	4.78157	3.81422	2.38234	5.7005	5.53128
ENSBTAG00000007063	GPHA2	1	1	0	0	0.234858	1.41556	2.19108	0.629426	0.104181	0.95126	0.268211	0.264371	0.469376	0.465536	0.216391	1.35942	8.61601	7.03965	1.6074	1.42647
ENSBTAG00000007073	CPB2	1	0	0	0	2.99817	2.88623	3.65166	6.13016	3.64937	3.03268	15.5403	15.6428	5.58282	4.96527	3.12717	4.75459	3.97798	2.22101	4.82033	5.03879
ENSBTAG00000007090	MYH2	1	1	0	0	3.09059	7.09795	7.52411	4.62162	2.50368	5.49016	6.42012	6.67251	19.0558	19.2325	7.98797	6.40702	8.41625	8.72112	5.83498	5.70754
ENSBTAG00000007092	GRPR	1	0	0	0	4.95732	6.14417	0.568291	3.10793	5.76756	7.39751	0.138946	0.984372	1.00185	0.587671	3.97517	4.40023	8.87727	9.18528	6.61821	6.17738
ENSBTAG00000007108	LGALS12	1	1	0	0	0.0957533	1.23425	11.959	12.7748	1.53523	2.47181	5.31778	6.35996	7.35036	7.3644	3.38643	4.78375	0.615995	2.50647	1.66984	2.58264
ENSBTAG00000007131	GADL1	0	1	0	0	6.508	4.73941	4.33283	3.54629	7.09078	7.43462	1.32388	2.08224	13.8777	13.8436	4.44009	3.68311	3.93619	3.56087	7.09237	5.91931
ENSBTAG00000007146	CPVL	1	1	0	0	11.0533	10.4561	2.44909	2.0819	2.06525	0.822002	2.10129	1.13597	1.38382	1.10027	6.72821	6.63699	6.53685	3.87801	10.3237	8.57318
ENSBTAG00000007195	GUCA2A	1	0	0	0	5.5429	1.2697	1.65905	1.29281	4.05734	2.25126	6.29888	5.23141	1.89462	0.712538	3.47524	4.00488	1.80711	0.176583	5.97349	3.69682
ENSBTAG00000007200	COX6B2	1	0	0	0	7.25178	4.87528	4.58643	3.45948	6.798	7.14902	1.19418	3.48053	0.290353	0.232387	8.43721	7.80823	0.610042	2.4558	8.58005	6.6177
ENSBTAG00000007210	RBFOX1	1	0	0	0	5.83286	4.6215	3.9693	2.28032	11.4341	10.9604	2.66056	1.46594	11.8375	11.6456	5.88073	5.3723	5.59454	5.52809	7.18898	5.97443
ENSBTAG00000007211	ASB12	0	1	0	0	1.6403	1.81674	1.32542	1.73056	1.79229	2.2664	1.04217	1.23007	11.5903	11.5434	2.6803	2.44689	1.25208	0.879696	1.91006	2.40619
ENSBTAG00000007214	ELL2	0	0	1	0	2.64804	2.92092	4.32102	4.15281	3.05122	3.12673	3.79384	3.71138	3.15801	2.8814	3.92913	3.8977	4.6378	4.50301	2.18173	2.04767
ENSBTAG00000007239	TSG-6	1	0	0	0	8.25487	8.08999	12.1411	11.8863	7.43439	7.6441	2.6811	2.22892	9.70927	9.20262	7.27028	9.26073	3.07096	2.39183	8.27848	7.75374
ENSBTAG00000007241	SLAMF9	0	1	0	0	2.09031	3.015	10.8675	10.3611	0.97552	2.4838	2.25784	2.5459	5.41278	6.17537	4.7003	4.94697	1.21149	1.07716	2.53101	3.96907
ENSBTAG00000007243	CCDC147	1	1	0	0	9.22603	8.96061	1.86631	0.929109	4.39168	5.32588	0.662162	1.45282	0.382557	0.153229	5.12686	2.99859	5.64818	4.63391	7.33675	4.12996
ENSBTAG00000007284	CCNA1	1	0	0	0	11.7672	11.1192	3.02467	2.24629	8.35583	8.28565	1.52762	0.694979	1.55776	2.95817	8.6701	8.03421	9.78686	9.42116	11.1679	8.36679
ENSBTAG00000007298	TEX29	1	0	0	0	3.1183	5.54179	0.709355	2.33882	7.3303	7.26846	0.358925	0.461599	0.971855	1.94812	3.95488	2.07074	5.39462	4.27206	0.14968	0.964909
ENSBTAG00000007300	FHL3	0	1	1	0	3.49736	2.50754	3.40117	2.75275	2.15785	2.10143	0.514611	0.266468	8.33617	8.21757	4.88523	4.52192	2.03074	1.76601	4.63708	4.38288
ENSBTAG00000007307	SELE	1	0	0	0	2.80644	4.18608	1.47972	3.3072	2.01323	3.30283	3.20055	4.75185	1.03047	1.41952	4.61016	4.9919	3.15464	2.39926	2.06269	1.72845
ENSBTAG00000007312	CD209	0	1	0	0	2.84315	2.36729	9.9795	9.75528	0.403254	1.18512	6.8446	6.60125	5.97011	5.65584	4.04102	3.92378	1.47031	1.66632	2.53815	2.3653
ENSBTAG00000007336	HCST	1	0	0	0	7.36391	7.33938	7.39721	8.16226	2.82801	4.70664	7.72686	8.14213	3.17562	5.98582	7.80279	8.06784	1.43614	3.4439	7.23263	7.65342
ENSBTAG00000007347	ST8SIA3	0	1	0	0	1.68085	3.8272	2.53979	1.22654	12.0957	12.3079	1.09669	1.88009	3.59882	1.83567	0.729648	1.77733	12.6284	12.7655	1.67472	2.31662
ENSBTAG00000007348	STRA6	0	1	0	0	11.0795	10.9222	4.64722	4.33942	7.45689	7.0578	2.4778	2.25009	4.41716	4.40947	13.2328	12.6977	7.73631	7.43773	10.0207	8.94627
ENSBTAG00000007359	PROP1	1	1	1	0	0.33863	2.58015	1.82927	1.46457	2.51564	3.84165	0.0201225	0.240376	1.51489	1.88078	3.13765	4.94865	12.4176	12.5969	0.804504	1.12234
ENSBTAG00000007371	SCAMP1	0	0	0	1	2.37478	2.23605	2.66263	2.83854	4.44529	4.53965	1.5121	1.48166	2.82631	2.8997	2.54579	2.7076	3.40667	3.32487	2.56284	2.39156
ENSBTAG00000007379	ALK	1	0	0	0	7.14591	7.36695	3.70397	3.86084	9.27022	9.64385	1.39891	0.521939	7.51651	7.93844	1.54292	3.56005	10.3858	10.7271	4.58685	3.0694
ENSBTAG00000007403	SLC7A3	1	0	0	0	7.79654	6.89194	1.0558	0.612164	9.27695	10.0973	0.291824	1.3633	0.979369	0.934416	7.54886	7.1207	4.72121	4.13021	7.70134	7.25429
ENSBTAG00000007411	F7	1	0	0	0	5.41113	7.0044	2.69123	4.86266	1.63551	4.29321	14.627	14.9851	3.48619	3.12351	0.912171	2.37265	1.15086	2.68826	4.38028	4.64393
ENSBTAG00000007424	LIF	1	0	0	0	7.48882	5.31677	7.21077	6.85438	3.79005	1.70264	4.7547	3.43125	6.22399	5.58411	6.80141	6.34694	4.40533	3.73455	5.98044	5.15699
ENSBTAG00000007430	MYBBP1A	0	0	1	0	3.30395	3.16291	3.65426	3.31027	3.61795	3.70974	4.21731	4.0549	3.52302	3.65191	3.74288	3.61703	3.21326	3.26609	3.68481	3.1408
ENSBTAG00000007436	GGT6	1	0	0	0	9.04176	9.17903	2.11305	3.99859	5.26083	6.12331	4.5427	5.01726	0.711455	0.826749	4.94085	5.09491	6.79166	7.45665	7.74397	6.38063
ENSBTAG00000007437	TEKT1	1	0	0	0	11.726	11.4766	2.48897	0.613716	9.02147	9.29442	2.57361	0.933283	1.16305	1.6555	8.42328	6.88292	10.0178	9.89083	10.5834	8.39205
ENSBTAG00000007440	MLANA	1	0	0	0	1.62486	1.48595	4.3983	4.47757	3.40525	4.11859	9.4765	8.13434	3.13566	3.38754	3.86727	2.86613	6.47113	6.31184	1.08702	1.87929
ENSBTAG00000007445	CD28	1	0	0	0	5.61093	4.50971	4.96763	4.08613	3.62019	4.09057	7.86587	7.81456	1.96198	1.92799	4.58002	3.26028	1.22534	3.50974	3.48532	2.01604
ENSBTAG00000007486	CEL	1	0	0	0	5.7097	5.82929	0.739988	0.0746688	5.5584	6.53882	1.17425	0.464724	1.35127	0.658154	2.12616	1.84727	8.09862	7.3737	2.33144	0.464949
ENSBTAG00000007489	NCOA3	0	0	1	0	3.11082	2.52717	3.15218	3.19706	2.10836	2.13426	2.33854	2.30895	2.87256	2.84623	3.15353	3.07332	2.8873	2.90587	3.42847	3.35233
ENSBTAG00000007494	SMARCA2	0	0	1	0	7.29957	6.83982	6.54277	6.551	6.78684	6.86615	6.24431	6.31318	6.75759	6.91502	6.6553	6.61026	6.39097	6.34262	7.50104	7.79544
ENSBTAG00000007496	P2RX2	1	1	0	0	2.51765	5.22345	0.666933	0.938659	7.89543	7.93665	1.86135	1.36287	2.60472	2.53116	6.8678	4.80896	12.6095	12.4579	1.89914	4.97144
ENSBTAG00000007509	bta-mir-935	1	1	0	0	1.04136	3.53634	1.17667	0.721461	12.9331	13.1701	0.88737	1.75807	0.774975	0.980438	0.63043	2.21282	2.50596	3.25287	0.028705	0.234166
ENSBTAG00000007514	CPNE5	1	0	0	1	9.53388	7.22619	7.5933	6.7641	10.6588	10.1046	4.14605	2.51535	5.14681	4.47659	9.73817	8.86259	6.51734	6.18795	9.48383	8.46982
ENSBTAG00000007534	GGH	0	0	0	1	1.90622	1.81099	5.43614	5.53	4.56176	4.68258	5.90855	5.96834	0.765881	0.593825	3.00575	3.17805	4.25109	4.12813	1.93401	1.76969
ENSBTAG00000007547	CACNG1	1	1	0	0	2.54222	2.78044	2.62578	1.29765	0.811538	2.74721	3.7443	4.44255	15.3981	15.3926	3.18476	3.43757	4.86158	5.09898	3.53817	4.33453
ENSBTAG00000007568	MEPE	1	1	0	1	0.03153	0.259212	1.06144	0.716641	1.94278	3.66959	0.622834	0.827071	2.46105	3.23074	6.95568	6.84886	2.77143	5.00736	0.354669	1.14646
ENSBTAG00000007583	KRT14	0	1	0	0	7.39391	9.13307	0.149386	0.2574	1.94555	1.63586	1.86219	2.45857	0.996711	1.69228	4.37313	4.1897	4.35787	3.88695	4.86834	5.7374
ENSBTAG00000007589	SMAD9	0	0	1	0	3.23353	2.44443	1.97158	1.97485	1.99084	1.9911	2.35291	2.43743	0.81186	1.19113	3.37319	3.17199	1.39946	1.12373	3.16351	2.91117
ENSBTAG00000007592	RARG	0	0	1	0	3.03294	2.88081	2.44649	2.379	0.559486	0.552131	0.792172	0.777683	1.67762	1.8726	2.29434	2.19112	1.87066	1.74595	3.07424	3.12275
ENSBTAG00000007633	ANKRD34B	0	1	0	0	0.859807	0.0374767	1.14634	1.0424	11.5633	11.408	1.16846	0.467876	0.742674	1.21478	11.5069	11.0954	5.24551	4.56542	2.20152	1.99786
ENSBTAG00000007687	GDF6	1	1	0	0	9.49805	8.27728	6.36899	3.95356	6.62079	6.35994	1.63299	0.771983	3.37718	2.97715	1.91015	2.89397	0.333033	0.0611625	6.47437	3.19928
ENSBTAG00000007690	AGXT2	1	0	0	0	2.66824	3.18141	1.33995	4.60473	2.97422	1.91165	13.9153	14.1371	2.35312	1.37375	0.865826	3.38088	7.51834	7.88079	3.9605	2.6991
ENSBTAG00000007704	ELOVL7	1	0	0	0	10.4029	10.6035	10.0465	9.92914	11.0706	11.0966	6.21124	6.44536	7.82822	6.26285	8.3926	8.70691	11.6054	11.2511	10.5507	9.72059
ENSBTAG00000007718	TGIF1	0	0	1	0	5.14396	5.25397	3.48882	3.58923	0.728775	0.84709	2.64199	2.61489	1.51017	1.36747	5.09248	4.66802	2.37152	2.06058	5.06105	5.09054
ENSBTAG00000007730	ZFX	0	0	1	0	2.8175	2.78034	2.72249	2.65675	1.77581	1.79723	2.48915	2.39804	2.7902	2.83399	2.86112	2.76207	2.52725	2.44762	2.87689	2.73767
ENSBTAG00000007765	TFCP2L1	1	0	1	0	9.18637	9.38773	0.968476	0.602237	2.16325	2.08171	5.25039	4.41877	6.44922	5.9606	6.84276	6.79394	7.19878	6.15434	6.05112	2.95587
ENSBTAG00000007767	TBX15	0	1	1	0	1.56784	1.73388	9.33725	9.29968	3.38318	4.21272	2.28704	2.17244	13.9841	13.9117	3.41437	3.70513	5.61456	6.90296	2.50859	2.9063
ENSBTAG00000007768	KCNS2	1	0	0	0	9.06802	7.04511	2.0843	1.22641	11.0704	10.9922	0.481085	0.131211	0.96549	1.21653	4.36365	1.80492	2.09919	2.09143	7.49851	3.74203
ENSBTAG00000007782	MYOT	1	1	0	0	5.50894	7.93034	7.65341	5.0175	5.45094	7.59537	7.41179	6.89645	19.44	19.436	8.40422	7.49418	8.73719	8.91883	6.35743	6.93246
ENSBTAG00000007799	FAM54A	0	1	0	0	3.43763	3.26268	1.48537	1.51632	1.54777	1.74491	2.34583	2.12326	1.09588	1.06584	7.9385	7.54936	1.35017	1.21135	3.85432	2.42826
ENSBTAG00000007823	TG	1	0	0	0	3.85866	2.91085	1.52413	0.742165	2.13456	2.0018	2.96433	2.74476	1.95239	1.95189	2.79149	2.17537	4.98655	3.27736	3.53638	1.62692
ENSBTAG00000007843	ITIH1	1	0	0	1	6.70485	6.13671	8.49566	9.64908	5.05774	5.15745	17.9746	17.8452	7.40971	5.48438	4.80849	6.6082	6.73385	5.01901	7.8909	7.5134
ENSBTAG00000007851	IL24	1	0	0	0	1.78269	1.73509	2.11084	0.504657	5.43754	5.5654	6.80957	5.43573	1.54796	0.711998	0.743821	2.97659	1.20613	0.107713	3.91525	4.30466
ENSBTAG00000007859	VSIG1	1	1	0	0	9.14707	8.44193	2.87938	3.23781	2.28145	0.444456	3.19908	1.7673	0.663741	0.447021	4.86877	5.33347	0.269733	0.575009	9.00004	6.47647
ENSBTAG00000007872	PSIP1	0	0	0	1	5.07805	4.66823	4.2435	4.25785	5.2617	5.17125	3.25339	3.30031	4.16007	4.21347	5.36717	5.27534	5.332	5.28374	5.60668	5.38131
ENSBTAG00000007884	SREBF1	0	0	1	0	5.76225	6.38628	7.99803	7.63555	5.79831	5.93717	6.23334	6.37345	6.71078	6.81721	5.78431	5.83572	6.05591	6.16441	5.80532	6.2521
ENSBTAG00000007904	KRT72	1	1	0	0	5.22788	2.85869	0.682042	2.40641	0.496932	2.24418	1.09416	0.612066	0.729797	1.34537	5.06015	4.6821	0.0551767	0.709176	2.74258	2.72338
ENSBTAG00000007916	FOXJ1	1	0	1	0	12.6928	12.0582	3.35047	2.00285	8.76675	9.60127	6.72455	6.73111	1.8712	0.91154	7.21044	4.66165	7.92262	7.54569	11.7112	8.98075
ENSBTAG00000007969	CIDEC	1	1	0	0	8.06683	5.32263	18.5412	18.1983	5.82671	5.00123	8.85155	8.28575	12.0201	10.7312	8.57011	7.91497	8.03086	7.68997	6.92606	5.85752
ENSBTAG00000007971	OR6Q1	0	1	0	0	9.35211	10.6599	7.97705	8.71494	0.169614	0.235997	0.734724	0.801108	1.92124	1.31793	1.33923	0.592143	0.288817	0.298662	6.6654	7.73103
ENSBTAG00000007990	EPYC	1	0	0	0	0.10655	2.53992	6.60418	5.92318	2.91158	3.83803	3.96385	4.55747	1.34026	1.88892	2.13775	5.06757	10.2181	11.1283	0.256165	2.77201
ENSBTAG00000008009	PLD6	1	0	0	0	4.4341	2.62236	1.85667	3.27263	0.23844	1.52947	3.07049	2.77039	0.659875	1.21929	4.90194	1.16658	1.32479	0.979988	3.95582	3.76109
ENSBTAG00000008026	OXT	1	0	0	0	8.29766	6.88455	1.98193	3.67206	11.3488	14.6003	3.9229	4.63535	4.9733	2.91932	9.61098	12.4253	5.7614	5.09573	6.25664	3.83753
ENSBTAG00000008027	AVP	1	0	0	0	5.14607	4.82228	1.1986	3.60125	12.1602	15.3787	0.98542	3.28765	2.67179	3.07283	1.36607	4.12922	6.58567	5.87581	1.86287	4.1117
ENSBTAG00000008056	GAD2	0	1	0	0	2.63531	2.96352	0.595732	0.850828	13.7745	14.056	1.0934	1.30333	1.50528	1.41329	1.86644	1.8861	3.44436	5.39713	2.37558	2.92263
ENSBTAG00000008059	CHRM3	1	0	0	0	7.97789	5.39286	3.06648	2.80864	9.05533	8.90271	3.50379	2.50408	2.43376	0.803145	8.65853	8.15669	9.24425	8.81167	8.63478	7.6841
ENSBTAG00000008062	DMRT2	1	1	1	0	7.9558	7.35713	12.8495	12.8168	3.42869	1.2669	3.94366	3.93704	9.97592	9.40908	2.91421	3.27006	3.97511	3.74757	5.81524	3.49899
ENSBTAG00000008088	KIF18B	0	1	0	0	3.10255	1.37388	2.02912	2.28103	1.01838	0.593914	1.74763	1.575	2.2179	2.50242	6.31158	6.03951	0.750595	0.875445	4.41752	3.16714
ENSBTAG00000008127	RBP5	1	0	0	0	0.0948933	2.92643	4.35862	5.99422	1.88634	4.66503	14.515	15.1451	3.80353	3.32824	1.07191	2.99222	3.73961	5.28406	2.2169	3.2057
ENSBTAG00000008139	HOXA3	1	0	1	0	11.1266	10.998	10.7683	10.9837	1.18311	3.01978	7.83274	7.97464	10.7547	11.0015	8.42747	7.9144	0.743115	0.760137	11.5485	11.793
ENSBTAG00000008150	PKIA	0	0	0	1	1.93921	2.26899	1.28031	1.10046	4.01076	4.08177	1.39475	1.44405	7.53828	7.43241	3.93886	3.92783	4.3733	4.35095	1.20554	0.375476
ENSBTAG00000008161	CLCA1	1	0	0	0	5.04403	4.1169	2.63586	2.47165	5.22879	5.09598	0.677505	0.522683	0.536475	2.23165	4.69393	4.89733	5.16956	4.40976	4.68456	4.41917
ENSBTAG00000008168	STARD6	1	0	0	0	4.94888	2.56141	5.42146	5.01934	5.07267	5.7988	6.50421	6.20417	0.134221	0.916995	5.61777	5.81752	2.41666	4.56402	4.57067	5.23273
ENSBTAG00000008185	RTN2	0	1	0	0	0.771693	0.282161	0.99827	0.935241	4.86125	5.02713	1.02729	1.09694	7.22145	7.20004	1.65603	1.65285	2.82623	2.87904	1.62686	1.77622
ENSBTAG00000008195	PHKG1	0	1	0	0	2.086	1.38385	1.87081	1.73601	2.2957	2.09531	0.512708	0.453615	7.13365	6.97708	1.5923	1.32657	2.02761	1.67394	1.96235	1.88162
ENSBTAG00000008220	C15H11orf71	1	0	0	0	6.23764	6.79636	5.00828	5.2051	6.65028	7.42003	7.05024	7.78525	1.55496	4.25577	0.943149	3.94199	7.07447	6.94279	2.25316	2.1377
ENSBTAG00000008236	OR51E2	0	1	0	0	2.67353	0.68349	2.59213	2.51712	0.47434	1.80464	0.39052	0.344066	10.324	10.523	0.808181	0.0752463	1.64096	1.446	2.6992	2.49311
ENSBTAG00000008238	S100A7	1	0	0	0	6.77114	5.11366	7.54166	6.36768	3.6158	0.850491	0.421045	0.211126	4.65564	5.75121	7.61288	6.09198	0.4728	1.30986	5.35921	5.26832
ENSBTAG00000008255	QRFPR	1	1	0	0	12.316	10.3128	4.23408	2.97072	6.62687	7.02191	1.84482	2.244	2.82212	2.31878	11.9077	11.3433	7.91656	7.30961	10.2658	7.01187
ENSBTAG00000008259	IRG1	1	0	0	0	6.04447	5.22164	5.39276	5.74089	2.65343	4.08299	7.52515	7.53968	1.2975	0.0934312	6.32391	6.08082	6.27197	6.48135	5.33568	5.28947
ENSBTAG00000008271	C12H13orf33	0	1	0	0	5.52257	6.73197	10.6802	10.1775	4.57753	4.86139	0.87781	0.985246	8.3437	7.80279	3.4574	3.33814	4.22716	3.94834	4.81555	5.60271
ENSBTAG00000008295	ACTL6B	0	1	0	0	2.21426	1.70226	3.02459	1.78906	11.8588	11.8664	5.80707	6.19524	2.4449	0.94832	4.24609	4.2287	13.0499	12.9055	4.90217	4.87961
ENSBTAG00000008303	FKBP1A	0	0	0	1	12.8538	12.4628	14.084	14.0249	12.4148	12.3548	12.4761	12.4784	12.8012	12.7514	13.0626	13.0481	12.3944	12.4102	13.4644	13.3873
ENSBTAG00000008322	KCNA10	0	1	0	0	0.0581467	0.117538	0.283573	0.321094	3.99862	3.94388	0.652792	0.690314	0.853958	0.891479	0.484592	1.42207	7.55944	7.36577	0.107687	0.145209
ENSBTAG00000008333	ETV4	1	0	1	0	9.61265	7.81843	6.98259	7.18252	7.77843	7.73468	7.54474	7.25386	7.00163	8.23222	9.12085	9.40463	11.239	11.2329	9.18528	8.81738
ENSBTAG00000008336	HPCA	1	0	0	0	6.22496	4.6969	1.73259	3.57549	13.1667	12.8842	1.56914	1.35674	1.81627	2.66118	7.15089	7.41236	8.24525	8.15246	4.09734	1.85203
ENSBTAG00000008366	STAC2	1	0	0	0	7.82716	8.23953	5.32521	5.74281	10.2707	10.48	0.0214475	2.78389	6.66542	6.76417	5.47524	6.02165	9.13583	9.50626	7.10794	8.17952
ENSBTAG00000008384	SLC25A47	1	0	0	0	3.29811	4.00503	2.48452	5.34339	3.83647	4.36932	14.6814	14.6353	4.6673	2.8345	3.01955	3.11892	3.39569	1.82835	4.27482	4.15586
ENSBTAG00000008394	MYL3	1	1	0	0	5.64117	9.7531	6.02307	4.95788	1.79099	3.19728	2.28627	4.59093	16.3739	16.3733	5.01372	4.45809	3.00503	5.40675	5.35555	7.02566
ENSBTAG00000008409	MYC	0	0	1	0	4.10436	2.59825	6.23926	5.42484	0.851808	0.69544	3.20981	2.33026	4.08395	3.10213	6.06276	5.46603	1.88143	1.42224	4.88168	3.66754
ENSBTAG00000008410	OVOL2	0	1	1	0	12.2033	13.123	1.23006	0.0614212	4.09214	4.22388	4.79702	4.28425	3.76006	3.17176	4.62053	2.64586	10.1808	9.75934	11.0315	10.6373
ENSBTAG00000008431	MOGAT1	1	0	0	0	6.48903	7.51662	1.24984	3.57871	7.24268	7.03823	11.7147	11.838	6.3131	6.9422	4.12388	4.6962	6.99647	7.20711	4.9212	3.67487
ENSBTAG00000008448	MEIS1	0	0	1	0	5.43836	4.56508	3.46155	3.07103	3.2976	3.20315	0.431681	0.413363	2.48564	2.41961	4.24671	3.72957	0.802728	0.609789	6.27368	5.98879
ENSBTAG00000008463	SLC22A14	1	0	0	0	3.26919	3.34968	2.03369	3.60789	5.50879	5.19796	5.48224	4.57951	3.10892	2.21637	2.21362	1.59662	4.62392	4.00497	3.31891	0.0963125
ENSBTAG00000008479	CXCL13	1	0	0	0	7.58342	5.78254	8.69861	8.78671	1.84537	2.20852	2.10936	0.0547987	6.58422	6.72767	7.73893	7.60195	4.31133	5.0473	7.20223	6.9398
ENSBTAG00000008485	TCEAL1	0	0	1	0	2.66408	1.99781	2.08293	2.04219	3.02248	3.03178	2.61644	2.69202	1.46546	1.5668	3.39532	3.32694	3.00837	3.00166	2.96749	2.92287
ENSBTAG00000008493	AQP3	0	1	0	0	1.93035	1.84626	9.87875	9.90962	0.89172	1.00906	3.11951	2.62354	5.10477	5.09563	2.51472	2.33689	2.53842	2.37866	1.93961	1.94858
ENSBTAG00000008494	TMEM171	1	0	0	0	7.66729	10.1242	2.60655	4.57405	2.09753	4.14668	11.7714	11.9761	2.27846	0.901658	3.39595	2.97358	4.89239	4.62558	5.91796	5.97903
ENSBTAG00000008500	CTRB1	1	0	0	0	0.136548	0.279323	0.343492	0.504124	4.95583	4.64232	0.712713	0.873344	0.913878	1.07451	2.52642	4.86935	2.75449	4.1547	0.167602	0.328234
ENSBTAG00000008501	FOXD3	1	0	1	0	5.50946	5.22033	6.66179	6.20708	1.04195	2.03319	1.30119	0.0718162	7.87603	7.85404	5.11996	3.8164	1.15286	1.44447	4.52986	5.6031
ENSBTAG00000008505	APOB	1	0	0	0	3.21549	3.91445	4.01986	6.10037	2.22225	2.34891	15.3568	15.3821	5.16429	3.80194	3.33662	4.46244	3.9244	2.32326	5.21741	5.17028
ENSBTAG00000008512	KCNV1	1	0	0	0	0.520328	2.82237	3.55749	3.25337	11.4191	11.7088	0.05896	0.157735	0.260125	0.3589	0.747864	1.26753	7.44787	7.46359	0.699964	0.739185
ENSBTAG00000008540	SLC22A1	1	0	0	0	2.56438	2.42267	2.98166	6.1029	3.81326	4.21293	15.2605	15.4274	4.63323	3.19687	3.23597	4.76272	3.13509	5.17755	4.71649	4.60288
ENSBTAG00000008593	INCA1	0	1	0	0	1.21954	0.697456	1.16138	1.18256	0.577222	0.0927894	1.28613	1.50627	4.17141	4.26238	1.43717	1.60346	0.755412	0.827638	1.50456	1.59396
ENSBTAG00000008596	PRICKLE1	0	0	0	1	3.17791	3.08497	3.27462	3.23279	3.38453	3.47546	0.350162	0.248482	1.03436	1.09227	2.8727	2.79777	2.73698	2.93666	3.14661	2.90133
ENSBTAG00000008607	ARID3A	0	0	1	0	1.60577	1.91514	1.69428	2.11003	0.721061	0.802647	1.60335	1.64105	0.718559	0.849038	1.44126	1.58724	2.16853	2.49218	1.25882	1.70048
ENSBTAG00000008641	GNAT3	1	1	0	0	1.0459	4.48666	6.02771	5.99413	2.61395	3.77822	0.0676512	0.169141	0.268816	0.370306	2.02222	2.10357	1.56869	1.20855	1.44357	0.239436
ENSBTAG00000008647	KLHL1	1	0	0	0	1.03775	0.17969	0.869095	2.6601	10.5724	11.2639	1.19385	0.593012	2.49755	1.8723	6.29576	4.94939	10.9338	10.5291	0.949175	0.890736
ENSBTAG00000008652	DUSP27	0	1	0	0	3.89881	3.87451	3.17819	1.50198	2.25935	3.23489	2.62959	2.73884	14.4046	14.2483	3.57309	3.41482	4.92766	5.10179	4.21965	3.11648
ENSBTAG00000008672	GABRD	0	0	0	1	5.38454	5.10626	3.53854	3.01068	10.056	9.89016	2.51051	2.37024	1.47599	1.43501	4.16592	4.2778	10.7972	10.4833	6.25179	6.59939
ENSBTAG00000008687	PCSK2	1	0	0	0	4.96069	1.10106	2.04843	2.08544	11.8933	11.9384	4.79873	4.5139	1.34224	2.26375	8.463	8.50646	10.9884	10.7391	5.75582	6.12501
ENSBTAG00000008749	OLIG3	0	1	1	0	0.0471067	0.0462817	1.33505	0.593034	9.83167	10.1987	0.640972	0.621624	0.842137	0.822789	0.0485775	0.0292288	0.160807	0.139709	0.0958675	0.0765187
ENSBTAG00000008763	CXHXorf64	0	1	0	0	1.42626	0.439663	1.2566	0.526528	0.158235	0.0415275	0.723345	0.606637	13.051	12.8308	1.141	0.337813	0.249702	0.134927	1.40244	1.30697
ENSBTAG00000008783	HTR7	0	0	0	1	2.41799	1.11007	2.96507	2.8498	3.52244	4.02382	3.33361	3.18203	1.02246	1.37242	2.62738	2.49492	2.6828	2.36329	1.69988	1.47183
ENSBTAG00000008805	USP3	0	0	0	1	2.46313	2.42676	2.02735	2.17264	1.19059	1.25984	1.9527	2.10122	1.17931	1.3144	2.38096	2.46398	1.88095	1.94023	2.66629	2.71963
ENSBTAG00000008807	FBXL22	0	1	0	0	5.53417	3.44899	2.8483	2.81745	1.2877	0.929115	1.11018	0.933816	4.73221	4.89683	4.78198	4.45943	1.77452	2.00211	7.25383	7.59746
ENSBTAG00000008819	BTBD16	1	0	0	0	7.19959	9.27062	5.06447	6.39515	6.34509	7.08821	0.616303	0.940312	0.301272	1.86065	3.09589	5.23075	4.37304	4.76034	5.62666	6.6293
ENSBTAG00000008828	IGDCC3	1	0	0	0	5.70727	4.87862	3.4605	1.84862	9.48874	9.23563	0.826119	1.07294	0.794096	0.588669	6.74291	7.06008	8.54727	8.31894	4.55142	2.12478
ENSBTAG00000008857	GALR3	1	0	0	0	4.86334	4.4543	4.62238	5.99698	6.68238	7.03059	8.36844	8.02607	0.892359	1.69226	1.55149	2.51846	1.19554	2.76627	4.1798	2.51706
ENSBTAG00000008866	GANC	0	1	0	0	1.00172	0.873443	0.655301	1.14132	1.28582	1.42098	1.13182	1.11938	3.98163	4.03946	0.262946	0.513416	2.05793	2.07478	0.76947	0.869139
ENSBTAG00000008868	CAPN3	0	1	0	0	1.39507	1.62486	1.20613	1.26742	3.74296	3.99528	1.21247	1.00726	10.8974	10.9197	1.41802	1.5013	2.77602	2.67228	0.782466	0.799408
ENSBTAG00000008871	DDX4	0	1	0	0	2.07812	4.33655	1.48638	1.07815	0.0761037	0.951268	0.477699	1.00595	0.460844	0.526541	6.07254	5.67689	1.02978	0.935972	2.72619	2.06446
ENSBTAG00000008881	PURA	0	0	1	0	2.3046	2.70818	2.64391	2.55556	3.40326	3.49874	2.36531	2.36034	2.41203	2.6198	2.33522	2.38688	3.83723	3.86043	2.40917	2.56824
ENSBTAG00000008898	GBX2	0	1	1	0	0.0670567	0.141305	1.49222	1.6385	10.0963	10.3145	0.667886	0.703603	1.4885	2.83843	2.94681	2.8959	1.69846	0.630742	0.122781	0.158498
ENSBTAG00000008905	FIGLA	0	1	1	0	0.036305	0.0314817	0.590705	1.28463	0.795035	2.33807	1.76943	0.98169	0.82856	0.817004	7.40099	5.69078	0.149847	0.130419	0.08229	0.0707337
ENSBTAG00000008920	ATP1B4	0	1	0	0	3.34891	3.98013	4.29336	4.30982	2.09637	2.59823	3.36363	3.1864	12.8968	12.9924	3.09342	2.87833	3.11458	3.37124	3.57736	3.22961
ENSBTAG00000008922	APOL6	0	1	0	0	4.28311	1.96414	14.82	14.833	2.70208	1.73795	2.63375	3.25156	9.14005	8.18972	5.61962	5.88918	3.28647	4.04053	2.41843	2.63124
ENSBTAG00000008934	ESPL1	1	0	0	0	2.62877	1.16019	2.02686	1.98048	0.972685	0.793292	1.41687	1.11471	0.977465	0.749694	5.5241	5.20525	1.09767	1.04185	3.42826	1.31968
ENSBTAG00000008945	SDSL	0	1	0	0	4.20978	4.28579	13.028	12.8772	13.2946	13.5371	5.25015	5.31926	4.59001	4.6587	4.38617	4.13901	4.4176	4.91477	2.65641	2.59982
ENSBTAG00000008951	ALPL	0	0	0	1	6.35764	8.00478	1.64803	1.6821	3.81711	3.90617	4.83801	4.82692	3.02713	3.23031	4.13289	4.0224	0.385569	0.883374	4.53398	4.22345
ENSBTAG00000008966	TSPAN7	0	0	0	1	5.54688	6.05842	5.91073	6.0752	8.87166	9.09694	6.4714	6.54549	6.15588	6.13927	5.31589	5.40317	7.3648	7.37045	5.68936	5.95297
ENSBTAG00000008989	LOH12CR1	0	0	0	1	2.37543	2.84129	2.22616	2.18375	3.40482	3.58848	0.74529	0.766754	1.40109	1.60647	2.13463	2.138	2.19411	2.3555	2.63643	3.00186
ENSBTAG00000009012	PTX3	1	0	0	0	7.2086	8.10688	12.5742	10.7964	5.98968	5.28073	4.89105	3.99725	9.6061	7.69326	9.85215	9.40426	2.35696	2.34802	5.05056	4.91937
ENSBTAG00000009014	UPK1B	0	1	0	0	9.55751	7.44236	4.32582	4.28603	5.99723	5.80192	3.02283	3.01087	3.90455	3.45636	12.0217	11.642	7.29717	6.84248	9.20626	7.2276
ENSBTAG00000009017	NR5A1	0	1	1	0	3.88114	3.2961	3.45209	3.49549	2.72517	4.35669	2.54393	2.82577	2.5892	2.1635	12.3929	12.6944	11.6155	11.5075	3.7874	3.81604
ENSBTAG00000009042	ATXN7L2	0	1	0	0	0.737765	0.578563	0.650845	0.630805	0.75126	0.525346	0.454893	0.278653	1.98158	1.99885	1.17218	1.068	1.72333	1.72297	0.979629	0.887566
ENSBTAG00000009046	TBX6	0	0	1	0	2.2109	1.60056	1.62487	1.331	2.46109	2.14677	1.59049	1.00916	0.836729	0.870921	1.81282	1.59261	1.0734	1.17562	2.13239	2.10349
ENSBTAG00000009059	PITX2	1	1	1	0	3.59242	4.19116	5.02683	3.96702	4.79744	7.04855	1.9422	2.47658	9.89552	9.99801	4.77054	5.80613	13.2012	13.4205	2.99968	3.29146
ENSBTAG00000009093	GAL3ST2	1	0	0	0	5.58005	8.92062	1.40121	0.850183	8.63028	9.50963	0.520805	0.819082	1.35622	3.00011	0.23982	1.19877	0.006835	0.332913	2.22703	3.74328
ENSBTAG00000009105	ACSBG2	1	0	0	0	8.25445	7.7713	5.40877	4.81154	2.37392	3.15625	0.206779	0.0648438	1.72098	1.76589	2.99563	1.45121	4.18883	3.08228	7.71176	6.79766
ENSBTAG00000009128	POU1F1	1	1	1	0	1.03878	3.89447	3.72993	2.37737	2.33609	3.0146	0.876275	2.61533	4.63255	5.12126	1.91431	4.54708	14.1507	14.5504	2.55766	3.67069
ENSBTAG00000009144	BPIFA2A	1	0	0	0	3.62181	3.35921	5.70125	2.91114	3.71508	2.62809	0.489687	0.172198	0.690852	0.373363	3.02288	1.74008	6.5527	5.30793	4.64286	3.61974
ENSBTAG00000009148	GPA33	0	1	0	0	4.74209	4.73678	0.895454	0.202561	0.13782	0.805543	0.61229	1.08771	8.74462	8.93484	3.44308	2.2018	9.0776	9.21559	1.86641	0.394066
ENSBTAG00000009156	CAMK2N1	0	0	0	1	2.19246	1.37957	2.6461	2.48659	5.82874	5.67094	1.54162	1.46104	1.47851	1.35845	2.32668	2.4081	3.83662	3.6661	3.17086	4.02939
ENSBTAG00000009166	GSX1	0	1	1	0	8.93321	10.796	1.84515	0.903114	8.05783	8.65733	0.666941	0.776614	1.25154	2.17468	0.0745463	0.184219	0.15676	0.314254	8.80748	9.33459
ENSBTAG00000009182	CLCN1	0	1	0	0	2.54495	3.09873	3.3181	3.50827	1.55157	3.21714	3.83108	2.88499	13.2778	13.3209	3.50887	3.40685	1.97711	2.96194	2.33221	1.92679
ENSBTAG00000009212	APOA2	1	1	0	0	5.6942	5.64009	6.97706	10.2095	3.4437	3.72814	19.8108	19.8942	9.782	8.83028	7.78599	8.92939	7.72989	4.84145	9.19383	9.21785
ENSBTAG00000009236	DAGLB	0	0	0	1	2.88441	3.08121	3.29305	3.27033	3.08306	3.167	2.77331	2.72384	2.79674	2.78422	2.74665	2.76809	2.29167	2.24416	2.66245	2.73035
ENSBTAG00000009238	HOXC6	0	1	1	0	9.29463	8.03046	13.208	13.1999	3.35827	2.07226	2.26388	1.39827	13.168	13.0579	13.2645	12.761	2.19595	0.78554	11.8002	11.3433
ENSBTAG00000009249	OTP	1	0	1	0	0.0843567	0.473945	0.977228	2.84565	7.46479	10.6232	0.99634	2.12198	0.856874	1.25984	1.40997	1.94697	1.36888	4.05246	0.110604	0.513575
ENSBTAG00000009252	KLRA1	1	0	0	0	4.37649	4.47518	5.18909	5.0815	4.11805	3.15493	2.13362	3.73133	1.44191	2.50242	3.97141	3.72365	4.79634	4.9002	4.55077	4.63904
ENSBTAG00000009265	NR5A2	0	1	1	0	7.73203	7.20111	7.86694	8.29406	4.09879	3.89072	10.5314	10.5042	5.50384	4.88892	11.9006	12.0504	2.01634	2.55633	6.82133	6.4816
ENSBTAG00000009277	RGS17	0	1	0	0	7.08082	4.84057	0.0945275	0.12348	11.22	11.2532	1.13969	2.60274	1.00554	1.75716	11.3425	11.2243	9.66816	9.61984	8.73405	8.97145
ENSBTAG00000009349	MMEL1	1	0	0	0	0.571065	3.32684	0.0275288	1.19769	9.01664	9.20535	1.65504	1.20041	1.83126	1.40895	5.47976	5.99553	6.54682	6.32249	4.21922	3.76974
ENSBTAG00000009350	PLA2G12B	1	1	0	0	2.19667	0.0945083	2.24966	5.62651	2.54676	3.22966	14.7196	14.6379	1.70783	1.41256	5.501	5.88826	1.01388	0.923919	2.55017	0.285239
ENSBTAG00000009382	KLK13	1	1	0	0	1.19161	3.52722	9.80917	9.88085	0.532053	1.50339	1.62761	0.911652	6.4088	4.70887	1.38181	1.38447	0.137417	0.123669	4.53677	3.29046
ENSBTAG00000009387	MYOM2	0	1	0	0	2.80151	4.77163	5.04762	3.1835	5.9778	6.62732	4.59863	4.15221	16.2952	16.2771	5.6936	5.20047	5.68491	5.93606	3.60893	3.39492
ENSBTAG00000009394	NSMCE2	0	0	0	1	2.59285	2.18398	2.21312	2.27887	1.44185	1.24269	1.40716	1.36637	2.0278	2.01	2.70049	2.66279	1.58677	1.5551	2.73904	2.37898
ENSBTAG00000009396	EXO1	1	0	0	0	4.77899	1.40759	3.98359	3.98674	2.02647	2.96907	4.40749	4.24864	0.09031	1.69968	8.47192	8.31088	4.46096	4.71768	6.52643	4.90987
ENSBTAG00000009408	ADAM2	1	1	0	0	0.0283317	0.145173	0.94549	0.600602	0.0493512	0.180383	0.614461	0.745493	0.815626	0.946658	1.31551	4.19068	0.122578	0.248812	0.0693563	0.200387
ENSBTAG00000009420	SCML2	0	0	1	0	4.14962	2.6992	4.1431	3.93372	2.15746	1.84687	1.08669	0.654111	2.28488	2.2181	4.75754	4.45811	3.76266	3.63075	4.93698	4.46578
ENSBTAG00000009426	EZH2	0	0	1	0	1.89079	0.866862	1.49665	1.10921	1.14762	0.849933	0.461308	0.250498	0.994719	0.830284	3.21546	2.91517	1.21941	1.04298	2.08144	1.13609
ENSBTAG00000009433	BGLAP	0	0	1	0	7.64365	8.52386	8.14809	8.0089	8.42311	8.55974	6.98459	6.30179	6.73442	6.47268	8.23883	8.13188	6.95508	5.80081	8.26336	8.83235
ENSBTAG00000009475	PLXDC2	0	0	0	1	2.88065	2.54101	2.88814	2.55053	1.17626	1.39115	0.638863	0.63582	0.956025	0.925399	4.02239	3.65716	1.59998	1.65285	2.51367	2.55478
ENSBTAG00000009476	FIGF	0	1	0	0	7.43052	6.73839	12.3778	12.2934	2.16611	1.33194	2.31098	2.4379	8.9134	8.75085	9.01613	9.06072	4.73376	4.1456	8.01426	7.83573
ENSBTAG00000009481	C3H1orf87	1	0	0	0	10.375	10.6321	1.50293	2.3607	1.70773	2.36852	0.136694	1.15566	1.5703	0.992289	4.87814	3.21836	9.98985	9.84838	9.16351	7.61938
ENSBTAG00000009496	STAT5A	0	0	1	0	3.19968	2.67995	4.26724	4.35767	2.23648	2.40525	2.38438	2.44492	3.07784	3.20657	3.29819	3.29632	2.61318	2.68513	3.06023	2.88909
ENSBTAG00000009501	KLKB1	1	1	0	0	3.45511	1.5479	10.7442	11.3665	0.600482	2.53884	14.0328	14.1739	5.22241	4.59555	1.39633	2.89966	3.35343	2.70306	2.5018	3.65653
ENSBTAG00000009512	EPS8L1	1	0	0	0	9.63475	10.539	3.07405	1.24102	6.02372	5.97876	3.7052	4.17678	2.24269	1.95938	6.77379	6.53941	9.87131	9.79736	8.48512	8.23588
ENSBTAG00000009515	CA6	1	0	0	0	7.10628	5.40548	4.23901	5.65329	3.72594	3.24448	1.47149	1.43159	0.756269	1.34817	0.600784	2.5464	0.131673	0.767459	6.64073	3.89896
ENSBTAG00000009522	EIF4E	0	0	0	1	6.93888	6.84472	6.65076	6.4105	6.7727	6.70348	6.2958	6.25841	7.829	7.71354	7.30567	7.31047	7.52248	7.46387	7.22158	7.01528
ENSBTAG00000009532	WNT7B	1	0	0	0	3.84311	2.02336	1.53783	2.23854	10.7608	10.5866	0.832549	2.04923	0.398494	0.267509	5.99225	3.43084	6.20054	5.08561	0.999251	0.864387
ENSBTAG00000009533	RPL3L	0	1	0	0	1.30278	1.8256	0.545929	0.452371	1.48255	1.58839	1.58561	1.8417	9.95069	10.0368	0.949527	0.831663	0.992168	0.958645	1.36371	1.51138
ENSBTAG00000009536	RNF151	1	0	0	0	1.7454	1.79062	3.27776	1.7703	2.39014	2.29855	0.255165	1.00382	2.94116	3.20814	1.86149	1.16892	0.775397	3.48155	2.29405	2.47415
ENSBTAG00000009570	C19orf80	1	0	0	0	5.60315	5.9915	7.58932	9.33548	0.687345	3.57071	15.3697	15.4571	5.56322	6.1618	0.061725	1.67569	1.27997	1.25166	3.53859	3.24527
ENSBTAG00000009585	CDH16	0	1	0	0	8.48945	9.64424	0.7001	0.0883188	2.63967	3.93739	1.56188	1.85445	4.84518	4.50954	5.89553	4.60918	1.66797	2.37412	7.65501	5.949
ENSBTAG00000009587	NRG3	1	0	0	0	2.66858	1.54835	0.85746	0.764376	11.5672	11.7186	1.98623	0.583494	1.25188	3.38434	5.01366	3.50929	7.67465	6.94023	4.83431	5.38692
ENSBTAG00000009598	CHM	0	0	0	1	1.67092	1.91734	1.12176	1.14703	1.13813	1.17624	0.794376	0.895489	1.58824	1.82812	1.48527	1.6741	2.04558	2.10002	1.78403	1.69476
ENSBTAG00000009599	LCN1	1	0	0	0	0.117883	2.22183	0.44215	2.85324	5.33579	6.82638	2.44878	4.42992	7.21689	7.31069	0.84785	1.26527	1.62948	2.54713	0.113375	2.20011
ENSBTAG00000009615	ANXA2	0	0	0	1	10.4202	10.3519	12.2637	11.9749	7.44911	7.63831	7.91422	7.87114	9.21604	8.95997	10.1117	10.0096	8.80953	8.73274	10.0889	9.80418
ENSBTAG00000009625	DMBX1	1	0	1	0	1.91626	0.425955	0.37662	0.0852438	5.57849	4.38957	3.56018	3.9569	0.947	0.655624	1.67666	1.09661	6.26375	3.97508	3.25152	0.886679
ENSBTAG00000009634	HOXC5	0	1	1	0	5.92648	7.65307	10.7362	10.8695	0.09421	0.152	0.65932	0.71711	9.477	9.78026	9.93332	9.63029	0.181857	0.250845	8.91228	8.81061
ENSBTAG00000009653	TCL1B	1	1	0	0	1.87575	6.21158	1.55071	1.7459	1.3399	1.52014	0.577352	0.753537	0.778517	0.954703	6.70306	5.44142	0.0952017	0.253742	0.708138	2.31828
ENSBTAG00000009656	BOLA-DQA2	1	0	0	0	12.1944	13.1782	13.42	14.4794	11.8818	13.177	12.4821	14.069	11.9732	13.0099	11.8739	13.512	14.5111	13.9584	12.6181	13.5783
ENSBTAG00000009696	ACTN2	0	1	0	0	3.365	3.27776	2.03219	1.22127	3.27346	3.02452	1.66799	2.06968	12.3825	12.3399	3.6538	3.61525	1.96153	2.01738	3.14445	2.73018
ENSBTAG00000009703	MYH7	1	1	0	0	8.83205	9.33599	9.0236	7.32666	10.358	10.7919	7.25022	7.18643	20.0878	20.0071	9.26097	8.25161	10.4388	10.6935	8.88986	8.58572
ENSBTAG00000009707	MYL1	1	1	0	0	4.33435	7.2674	7.44126	4.56046	1.64093	4.62375	6.08248	6.1701	19.2345	19.2549	7.78371	6.19069	8.28564	8.62095	5.72501	5.818
ENSBTAG00000009733	FBP1	0	1	0	0	1.08121	1.20601	8.31808	8.49617	1.19964	1.19015	9.32034	9.43003	2.22168	1.89494	1.86974	2.67847	3.6374	3.72484	0.963365	0.567646
ENSBTAG00000009735	A1BG	1	0	0	0	4.8739	4.77588	4.25436	6.69452	5.50589	5.67527	16.1431	16.4344	5.8488	3.96744	2.51625	4.62358	4.64403	3.55481	5.43475	5.58907
ENSBTAG00000009752	CD70	1	0	0	0	6.20603	6.8655	0.182781	2.37717	0.0533812	2.38884	5.64716	7.58183	0.687211	2.74168	4.4354	5.89787	1.8153	2.6628	1.91894	5.1023
ENSBTAG00000009774	MOBP	1	1	0	0	6.06636	6.72541	2.46964	2.36627	16.6164	16.9575	2.85522	3.5472	1.82797	4.39529	3.46421	2.38321	2.27518	5.58489	4.91742	3.1975
ENSBTAG00000009803	SNCB	1	0	0	0	5.00285	5.54916	1.73917	3.10768	14.2258	14.691	4.69737	5.55546	1.29197	3.97831	7.40839	8.81165	8.5539	9.45866	2.80916	3.65685
ENSBTAG00000009832	NOBOX	0	0	1	0	7.48667	7.0112	7.11744	7.22986	8.97151	8.65725	6.60449	6.52586	3.1521	4.62103	7.79451	7.42138	7.02881	6.93822	7.58271	7.55458
ENSBTAG00000009833	DTHD1	1	0	0	0	9.7263	9.73376	0.739149	0.525715	9.34117	9.64051	2.71258	1.47272	0.372959	0.185329	4.40291	2.61381	6.07304	6.12676	8.56872	6.83195
ENSBTAG00000009840	OR2AE1	1	0	0	0	2.36445	0.336353	1.69884	3.79473	1.05475	0.882298	8.38363	8.45672	0.39573	1.15946	4.71306	3.9199	6.539	8.00397	4.92789	5.41111
ENSBTAG00000009852	NAV3	0	0	0	1	1.3448	1.27555	1.88251	1.67464	3.31307	3.42785	2.91658	2.95676	0.785504	0.814736	0.845638	1.05407	1.81892	1.78834	1.35765	1.78739
ENSBTAG00000009862	C14orf105	1	1	0	0	10.2552	10.2614	1.09948	1.33008	3.20666	3.72508	10.6939	10.3798	0.258	0.114264	2.35877	1.2188	0.320128	1.56613	7.76526	3.78538
ENSBTAG00000009864	B4GALNT2	1	1	0	0	11.352	13.5929	4.54982	3.06962	0.913484	3.83988	1.65175	2.14226	1.74798	2.51415	2.28941	1.57416	3.65945	3.74094	10.7482	11.3252
ENSBTAG00000009870	HES6	0	0	1	0	4.66107	6.37856	8.26603	7.57639	8.84986	8.99374	6.12696	5.07033	7.49189	6.63129	3.28442	2.91574	9.2676	9.20812	5.00419	6.67931
ENSBTAG00000009876	C4BPA	1	0	0	0	5.55416	3.98298	7.52526	8.31846	2.17725	2.82194	16.5654	16.3131	7.28128	6.58536	8.22014	7.90913	5.2783	3.02708	7.08225	8.14774
ENSBTAG00000009879	PCGF6	0	0	1	0	3.37596	3.49444	1.13571	1.0135	0.833862	0.479694	2.09278	1.99613	1.38159	1.3399	2.52269	2.3995	1.69383	1.65657	3.08517	2.84405
ENSBTAG00000009894	SERPINA10	1	1	0	0	3.01091	2.747	3.95327	6.47829	1.75112	2.00984	15.9871	16.0531	5.84841	3.95383	2.32421	4.19547	3.02544	2.56679	5.61206	5.23587
ENSBTAG00000009905	NFYA	0	0	1	0	2.86152	3.02142	2.70596	2.40651	1.76861	1.67316	2.42128	2.23089	1.4514	1.25198	2.74974	2.64938	2.83236	2.7622	2.58385	2.32909
ENSBTAG00000009913	UPK3A	1	1	0	0	6.88446	6.01565	1.95978	0.316275	1.83413	3.32998	4.6901	2.60985	0.430014	0.213875	2.13182	1.43976	4.79299	5.0754	3.71012	1.63581
ENSBTAG00000009938	XCL1	0	1	0	0	5.71536	3.74445	3.26655	4.78781	2.66979	3.0895	3.94221	2.95737	2.04404	3.62865	11.7094	11.019	2.49221	0.882864	5.7793	3.84273
ENSBTAG00000009950	PAX3	0	1	1	0	1.88162	0.140997	2.59274	2.98308	3.31291	1.82482	0.293009	0.799471	3.04444	2.55415	1.92315	2.39271	7.9856	8.41127	2.09917	2.69769
ENSBTAG00000009961	E4F1	0	0	1	0	2.38925	2.37432	2.51432	2.21293	1.77139	1.71194	1.63582	1.49861	1.81488	1.75861	2.31514	2.16663	2.20297	2.20576	2.3636	2.36672
ENSBTAG00000009968	TBX4	0	1	1	0	0.0151	0.0373467	4.77012	4.64544	1.67985	2.71532	0.60973	0.625637	0.810895	0.826802	0.928504	0.325137	0.132867	0.134962	0.064625	0.0805325
ENSBTAG00000009972	INHA	0	1	0	1	2.62558	2.2911	2.32628	2.52484	3.42471	3.34407	1.35088	1.11959	4.08483	4.02252	10.5434	10.4174	3.12416	2.96659	2.28766	2.51906
ENSBTAG00000010012	BTF3	0	0	1	0	14.1039	13.4848	14.3217	14.2761	12.3395	12.3656	13.3768	13.3088	14.2252	14.1798	14.4178	14.1967	13.0326	12.9692	14.7184	14.3874
ENSBTAG00000010016	C16H1orf227	1	0	0	0	6.86643	7.52015	4.66444	6.28003	2.54911	4.47378	0.782264	1.76814	2.18368	2.24645	5.53651	5.03158	7.39102	7.55183	6.52969	6.67966
ENSBTAG00000010026	CACNA1D	0	0	0	1	4.14403	4.16655	2.61926	2.86425	4.31868	4.29552	0.704619	0.793123	3.36684	3.39789	3.06265	3.72785	5.96664	6.11644	4.09886	4.8106
ENSBTAG00000010057	GZMB	1	0	0	0	4.80826	4.22021	1.23414	1.11944	2.72613	2.73089	4.34215	3.59608	0.307893	0.2562	2.07815	4.51477	3.22867	1.54847	3.52	2.3139
ENSBTAG00000010059	C8H9orf72	0	0	0	1	2.80174	3.02363	3.92223	4.22715	2.82734	2.79682	2.63913	2.61796	2.39531	2.40766	2.32992	2.32144	2.24984	2.2017	2.5778	2.76828
ENSBTAG00000010085	SLC7A2	0	0	0	1	1.48525	0.360685	1.92172	1.99422	3.32912	3.30396	4.95193	4.92761	3.60096	3.5476	3.36626	3.37768	1.56398	1.48907	3.32925	3.53567
ENSBTAG00000010089	CALC3	1	1	0	0	0.0297083	0.135442	0.259376	0.338884	9.07558	10.5497	0.628596	0.708104	0.829761	0.909269	0.0362013	0.115709	0.147563	0.215004	0.0834863	0.162994
ENSBTAG00000010094	C22H3orf24	1	0	0	0	3.26127	0.954818	0.168214	0.102929	6.92575	6.97463	0.537429	0.472144	0.738594	0.673309	1.82135	2.71878	4.25835	3.64298	4.83094	4.60208
ENSBTAG00000010112	BPIFB6	1	1	0	0	3.9199	1.24911	0.642081	1.18685	2.90698	1.91252	0.716706	0.636475	0.917871	0.83764	0.124311	0.04408	0.250335	0.150795	3.35757	4.07536
ENSBTAG00000010127	MIP	1	0	0	0	3.7217	4.20717	1.64081	3.76498	4.86271	5.06973	8.32335	8.32374	1.47821	1.38117	3.44339	2.90737	5.85595	5.9504	4.45846	3.23022
ENSBTAG00000010128	NAP1L5	1	0	0	0	0.988163	0.180542	0.766694	0.275307	6.58419	6.69115	0.368989	0.398842	1.07922	2.1891	1.0694	1.61542	2.40493	3.95445	1.75352	0.471898
ENSBTAG00000010129	SLITRK5	1	0	0	0	6.09691	2.06638	5.75601	4.92186	10.3927	10.2567	1.19063	1.78466	7.4551	7.23072	7.0773	6.8826	6.93012	7.0306	8.48572	8.19162
ENSBTAG00000010151	CA5A	1	0	0	0	3.3241	2.98942	8.29114	7.6651	1.06356	1.49814	12.3162	11.9933	3.20587	3.68503	4.61753	4.02295	5.80649	2.98387	1.99328	1.16476
ENSBTAG00000010161	CCL21	0	1	0	0	8.06643	6.05417	9.50957	9.75138	1.86866	3.44374	7.70851	7.48304	9.52182	9.36587	12.9933	13.3413	5.52832	5.55188	10.8612	11.8638
ENSBTAG00000010182	ACR	1	0	0	0	5.39452	7.4144	7.10507	7.81624	5.29772	3.5953	0.161331	0.236844	2.34601	3.96618	5.97975	5.62395	7.05134	7.32336	6.70796	6.32847
ENSBTAG00000010188	RDH8	1	1	0	0	1.3481	0.35562	8.85829	8.66024	4.3087	4.17318	1.63226	0.831603	3.32177	2.24557	3.55204	1.84577	1.68635	0.477008	0.255191	0.0199775
ENSBTAG00000010197	TSPO2	1	0	0	0	1.16494	3.7889	0.612779	1.60957	0.0545537	0.282626	10.1253	11.0253	0.820829	1.0489	0.0272687	0.255341	0.126118	0.349486	0.415189	1.36593
ENSBTAG00000010198	ATF7IP2	0	1	1	0	9.52727	10.0834	5.56825	5.60527	4.96647	4.61676	6.35785	6.20041	1.63944	1.0026	10.5417	10.257	0.880432	1.39184	7.10192	5.47638
ENSBTAG00000010215	CREB3L3	1	0	1	0	2.0603	2.75209	5.13347	6.52318	3.75883	4.01433	14.4481	14.2099	4.12376	2.89876	3.11952	4.11748	3.47171	1.73172	4.0793	3.72399
ENSBTAG00000010220	DCLRE1C	0	0	0	1	1.45339	1.72573	0.683127	0.622653	1.09575	1.0995	0.739116	0.694123	0.502755	0.410491	1.42359	1.52598	2.09484	2.06701	1.54164	1.48097
ENSBTAG00000010228	LMX1B	0	0	1	0	1.15322	0.128012	6.83953	5.42901	6.65786	6.65853	2.30049	0.912214	3.42053	3.13736	2.55149	2.77987	5.02427	5.88202	0.149131	0.718684
ENSBTAG00000010241	UNC5D	1	0	0	0	3.82733	3.43503	1.19747	3.64741	10.0938	10.7022	0.728819	0.779581	2.46523	3.06422	6.68354	7.19657	8.24729	8.17368	7.4981	8.59566
ENSBTAG00000010244	CLIC5	0	0	0	1	2.42676	3.44082	2.2181	2.33386	0.632282	0.766716	1.15351	1.31331	5.57443	5.52445	1.84197	2.29108	0.302507	0.635644	1.43903	1.44175
ENSBTAG00000010251	GABRG2	1	0	0	0	4.95076	4.40272	1.52683	0.824857	13.6053	13.6221	1.79974	0.887626	0.353725	1.51823	1.89578	2.23043	9.39768	9.31804	3.80197	1.38102
ENSBTAG00000010255	ZNF24	0	0	1	0	2.93561	3.32036	2.61205	2.68502	2.66782	2.72399	2.4029	2.37363	2.90861	3.06877	2.78373	2.8925	3.2209	3.17614	2.82749	2.76544
ENSBTAG00000010273	EREG	1	0	0	0	6.42788	7.33021	6.95729	7.09877	2.67408	3.43095	10.3386	10.3278	1.56233	0.11382	4.81099	7.41868	4.39255	1.39826	3.76966	4.41882
ENSBTAG00000010277	NKX2-2	0	1	1	0	3.2401	3.49724	3.7043	3.81791	12.6236	13.0049	1.80986	2.0758	3.27906	3.90473	2.54673	3.07179	13.3919	13.3027	0.0965575	0.181574
ENSBTAG00000010299	NOL4	1	0	0	0	5.77581	5.06703	2.26708	0.121774	10.832	10.9308	1.10684	2.26621	2.56477	1.31811	2.96354	3.93868	11.9394	11.864	5.96837	4.59597
ENSBTAG00000010314	ICAM4	1	0	0	0	3.61391	4.28412	5.2479	4.64199	1.3623	1.60756	4.00028	4.10817	4.20224	4.01439	8.02873	7.39324	2.82125	1.16929	2.98678	1.1604
ENSBTAG00000010328	KCNK17	1	0	0	0	6.61763	6.71289	9.46298	9.96688	2.65475	3.1441	8.74823	8.78304	3.36833	3.12184	7.13019	7.36045	2.35098	4.07156	6.06625	6.42125
ENSBTAG00000010345	XPNPEP2	0	1	0	0	7.15095	6.36891	12.367	12.7449	2.05393	2.29171	11.2693	11.5922	6.38082	6.04104	7.67917	7.43264	2.49419	3.09481	7.47708	7.59665
ENSBTAG00000010349	IL1A	1	0	0	0	7.16763	5.96303	5.69958	5.26321	2.00356	0.02313	8.95605	8.68272	4.77081	4.67382	6.52772	6.28961	6.65277	6.4123	5.14019	5.3995
ENSBTAG00000010352	KCNK16	1	0	0	0	6.48416	5.86014	4.06909	3.92619	3.61958	4.25907	3.4025	2.61226	0.94201	0.064845	2.18401	2.65646	3.57267	1.47905	5.85579	3.09915
ENSBTAG00000010379	CRTC1	0	0	1	0	1.83329	2.0257	1.33668	1.27325	2.82693	2.86068	0.733066	0.718413	2.42032	2.41885	1.80107	1.77948	2.41286	2.47796	1.77307	1.86287
ENSBTAG00000010382	MUC13	0	1	0	0	10.0937	12.855	3.29301	2.40611	1.42213	2.47158	2.06178	2.69273	1.86717	2.93167	8.67529	7.64241	5.36685	5.58511	7.67225	6.93494
ENSBTAG00000010397	B3GNT5	1	0	0	0	3.83456	4.73209	6.33917	6.07845	0.827507	0.578006	3.66082	1.14481	5.51767	5.2162	6.6748	6.58006	2.43467	2.05693	5.97164	5.60644
ENSBTAG00000010407	GSC	1	1	1	0	3.12399	5.77536	12.7632	13.075	2.41911	4.47419	3.18795	2.72426	5.59047	7.03508	0.130346	0.37945	2.57078	3.13293	1.56637	1.78325
ENSBTAG00000010411	ADAMTS8	1	0	0	0	6.28689	2.31994	3.4686	3.67915	7.95978	7.92852	0.896784	0.483666	4.87224	5.43823	5.17333	4.68178	3.72606	3.17056	9.09753	8.63645
ENSBTAG00000010414	DMRTA2	0	1	1	0	0.0515983	2.00479	1.85502	1.09928	5.71215	6.80703	0.0584975	0.736009	2.78112	3.48105	4.81412	6.02041	12.2581	12.4901	2.21956	1.7854
ENSBTAG00000010433	M-SAA3.2	1	1	0	0	12.6078	14.5384	3.71837	2.92218	8.14669	8.36002	7.55671	7.21131	2.69026	4.62184	5.09178	2.62616	2.86647	4.64583	10.6176	10.9038
ENSBTAG00000010445	DNASE2B	1	0	0	0	0.06563	0.221863	2.65861	2.72947	0.626405	2.11629	12.6882	13.2241	1.13852	2.0892	1.81237	3.37345	0.420742	1.29222	2.52222	2.87246
ENSBTAG00000010530	IAPP	1	0	0	0	1.76453	0.669963	0.335452	0.37851	0.977469	2.79822	4.89446	5.54325	0.905833	0.94889	0.112272	0.15533	0.240497	0.24613	1.40435	0.60139
ENSBTAG00000010560	PROK1	1	1	0	0	0.0388017	0.132018	0.255194	0.361064	3.02221	4.9516	0.624414	0.730284	0.825579	0.931449	0.0320187	0.137889	0.138067	0.233264	0.0793088	0.185179
ENSBTAG00000010573	FAM227A	1	0	0	0	8.62772	8.71075	2.42204	0.640899	8.01765	7.54733	3.93854	3.95157	1.73487	1.60063	7.10369	6.77793	10.0045	9.62342	8.07629	6.90859
ENSBTAG00000010578	IL17B	1	1	0	0	10.5158	9.45679	9.81147	10.369	6.4985	7.25854	6.73989	7.98646	2.98331	5.50995	6.32987	5.34265	0.0200117	1.14881	12.1124	12.3317
ENSBTAG00000010605	VAX2	1	0	1	0	5.6695	4.6391	4.56358	4.95274	3.81454	7.60817	0.270722	0.582611	1.50486	4.00826	2.80981	2.91588	1.89942	2.6628	4.90463	5.65667
ENSBTAG00000010632	FABP6	1	0	0	0	5.38137	4.31718	0.179594	2.12612	4.59709	5.50502	2.43402	1.82937	0.312524	1.33096	6.22944	7.21082	4.37944	5.88638	4.66462	5.19909
ENSBTAG00000010659	CUX1	0	0	1	0	3.02664	2.57524	3.51534	3.53248	2.48217	2.56273	2.21427	2.2317	3.98745	4.05546	3.70804	3.69524	3.33487	3.2892	3.73452	3.84221
ENSBTAG00000010665	CBLN3	1	0	0	0	8.02817	8.17215	6.14835	6.49099	6.49542	6.49661	7.00222	7.2529	2.37172	4.44482	7.55821	7.83941	8.22857	8.25954	7.37967	7.68006
ENSBTAG00000010671	GLI3	0	0	1	0	3.4804	2.7434	3.12433	3.05967	2.71217	2.69993	0.501659	0.402732	0.956721	0.986014	3.60215	3.34922	1.47666	1.35442	4.09047	4.42356
ENSBTAG00000010679	LRRC31	0	1	0	0	5.34785	6.48904	5.33246	6.54435	0.09364	0.122396	0.65875	0.687506	0.859915	0.888671	2.6904	2.88815	0.195993	0.193536	3.83724	2.23083
ENSBTAG00000010680	F1MB63	1	0	0	0	5.88258	3.93195	1.87629	1.01866	6.51225	5.54954	2.01803	0.254395	0.260279	0.842997	1.17192	1.54638	7.12186	7.35424	5.86408	4.97979
ENSBTAG00000010688	CSTA	1	1	0	0	1.79573	6.85778	0.987589	0.709563	0.856332	0.534373	0.279416	0.733637	0.480581	0.934801	0.0584262	1.30062	0.175203	1.41669	1.90993	6.97993
ENSBTAG00000010690	PDX1	0	1	0	0	0.0534967	0.0899317	0.602436	1.3757	1.70991	2.04929	1.95835	2.04685	0.836956	0.897664	0.0434013	0.10411	0.154738	0.20098	0.0906863	0.151395
ENSBTAG00000010741	KBTBD10	0	1	0	0	1.97153	2.17144	1.87391	1.40457	0.992305	1.33658	1.76101	1.682	12.2221	12.1008	2.07585	2.21086	4.95908	4.80896	2.09885	1.99701
ENSBTAG00000010773	GNPAT	0	0	0	1	4.49161	4.30257	4.78359	4.73558	4.42987	4.47661	3.39591	3.43666	5.30018	5.33101	4.60281	4.54075	4.39421	4.3941	4.69981	4.53221
ENSBTAG00000010784	ABT1	0	0	1	0	2.39152	2.64094	2.85982	2.6185	2.80847	2.87921	2.37788	2.21995	2.79766	2.68887	2.67881	2.61391	2.67662	2.66192	2.52603	2.44037
ENSBTAG00000010791	HTR3A	0	1	0	0	0.202125	0.100365	1.2521	0.572674	2.63793	2.00271	0.789353	0.675374	1.27066	1.75105	4.41438	3.48766	6.51491	5.54978	0.244242	0.130264
ENSBTAG00000010814	DIO1	1	1	0	0	1.64258	1.54279	2.18923	4.84934	3.82842	3.02569	15.9367	15.7464	3.47635	3.23954	2.86965	4.22584	1.56413	1.22233	4.50761	4.1524
ENSBTAG00000010829	EBF2	0	1	1	0	3.17405	2.20932	12.2709	12.128	5.46599	6.74998	0.0952487	0.942377	9.95069	10.1565	2.22731	1.42451	4.91391	6.42374	3.20996	4.72847
ENSBTAG00000010833	IL17RE	0	1	0	0	2.15609	3.674	7.38279	7.76386	1.35817	1.60773	1.74805	1.50066	2.31283	1.73883	1.66454	1.86662	5.32408	5.40038	1.3526	1.93555
ENSBTAG00000010837	HTR4	1	0	0	0	9.5649	7.68535	2.80093	2.23197	8.01902	7.38782	1.45157	0.206496	1.56201	2.65245	6.73545	6.19729	0.855487	1.0582	8.98971	7.87903
ENSBTAG00000010847	FOXN4	1	1	1	0	8.8511	6.6979	0.375686	0.064495	3.9122	5.16676	0.744901	0.43371	3.26656	2.30973	3.29485	1.52258	1.0092	2.16826	8.65731	3.60615
ENSBTAG00000010860	DRD2	0	1	0	0	2.31671	3.50361	7.54701	7.32371	10.4144	10.5763	2.50185	2.37998	4.57832	3.06505	3.23382	4.39611	13.5053	13.7199	2.96466	2.56748
ENSBTAG00000010866	BMPER	0	0	0	1	1.43081	0.515425	1.9832	1.41603	3.89483	3.58426	5.18655	4.98579	2.06487	1.90243	3.48525	2.84086	1.24706	0.826701	1.38934	1.22352
ENSBTAG00000010873	BHLHE23	0	1	0	0	0.0712283	0.24258	0.7212	1.87389	9.93847	10.352	2.94104	3.84789	0.839535	1.03317	0.04598	0.239618	3.00239	4.88908	0.093265	0.286902
ENSBTAG00000010874	GHSR	1	1	0	0	4.24634	4.10787	5.20885	5.53753	2.3548	3.91845	3.8241	4.71263	1.61295	1.07593	2.54455	5.30899	12.0474	11.966	1.61051	2.65159
ENSBTAG00000010875	MSX1	0	0	1	0	7.07078	7.95996	2.74904	2.6955	0.672136	1.04484	0.346389	0.36393	0.664211	0.831554	1.21488	1.70181	6.04915	6.10289	6.68529	6.3398
ENSBTAG00000010877	ARMC12	1	0	0	0	1.35634	2.8419	2.52161	3.17643	0.979772	0.855981	0.563037	0.877674	3.38264	3.99048	2.08033	2.60005	3.50256	3.76714	1.03698	3.08672
ENSBTAG00000010880	TNNI2	1	1	0	0	8.48882	10.2688	12.2505	11.983	5.91204	8.6426	9.84851	10.2206	21.5708	21.6494	10.4721	9.81962	10.594	10.999	9.43547	9.68116
ENSBTAG00000010889	FSHB	1	1	0	0	1.0717	2.70496	5.05065	3.73482	1.31389	3.87221	2.01191	3.82741	5.66938	3.49855	5.48013	6.22508	15.9955	15.7351	2.42644	3.55832
ENSBTAG00000010896	NKX3-2	0	0	1	0	1.65577	0.509965	5.1494	3.75502	8.07343	7.79595	0.783105	0.64828	1.97601	1.16715	1.52901	1.42081	2.28413	2.61057	0.237995	0.10317
ENSBTAG00000010897	RESP18	0	1	0	0	3.08748	4.73599	5.02097	5.23467	13.1499	13.7903	4.72368	5.52542	5.89338	5.77592	3.26833	4.30863	14.2027	14.4646	3.18189	4.18273
ENSBTAG00000010930	NPFFR1	0	1	0	0	0.0950617	0.185688	0.301293	0.414203	6.67591	8.15539	0.670513	0.783423	1.15183	1.8591	0.0781175	0.191028	0.173405	0.295878	0.125408	0.238318
ENSBTAG00000010938	C2H1orf64	0	1	0	0	9.00086	8.84579	0.06293	0.08378	12.0605	12.0216	0.729355	1.38075	0.633315	0.654165	1.159	1.29482	1.85891	1.68368	6.50424	6.54605
ENSBTAG00000010940	HSPB7	0	1	0	0	7.63058	8.97587	2.66976	2.32033	6.01129	6.38203	4.04743	5.46991	15.4941	15.5778	11.1161	11.5767	3.96923	5.14842	7.57058	8.89891
ENSBTAG00000010970	RPL21	1	1	0	0	0.189607	0.157877	1.567	0.725679	2.96773	3.79466	0.78364	0.725669	2.47224	1.40333	2.82819	0.978024	1.2938	2.9427	5.49115	5.53819
ENSBTAG00000010979	CDKL3	1	0	0	0	6.23645	6.54055	2.27755	3.28961	6.40675	6.29	0.0614975	1.86137	3.70175	3.54483	4.38794	4.28007	5.73586	6.09951	5.63253	5.90026
ENSBTAG00000011001	ERG	0	0	1	0	1.89486	1.45496	3.85593	3.8154	0.646247	0.663247	2.41237	2.4825	2.06561	2.1053	2.70718	2.56083	0.862296	0.68544	1.4733	1.6188
ENSBTAG00000011012	A0JN45	1	0	0	0	1.86206	1.57607	1.21614	0.445009	2.61019	2.06834	0.710849	0.534079	0.912014	0.735244	1.36259	1.06517	0.223788	0.0720138	3.02738	0.905699
ENSBTAG00000011021	CES1	1	0	0	0	5.57801	4.73802	6.47143	8.69226	6.19939	5.36379	17.987	17.892	7.57224	5.61217	4.6015	6.46793	6.5193	4.78425	7.63212	7.20211
ENSBTAG00000011023	C5H12orf59	1	0	0	0	6.43021	3.87492	0.930969	0.110698	0.965264	0.633355	3.73082	3.21998	1.46592	0.669728	3.47433	2.98551	3.04578	2.76695	5.44431	2.4119
ENSBTAG00000011057	GGNBP1	1	0	0	0	2.619	1.42924	5.04243	5.38628	5.06786	3.1277	1.57156	2.06716	1.00846	0.410489	5.53992	5.62898	0.118242	1.43964	2.76378	4.28417
ENSBTAG00000011071	BPIFC	1	0	0	0	4.63857	4.27268	1.7887	2.56063	4.86219	4.81417	3.4914	2.65753	5.24796	5.50146	0.43454	5.69793	5.60597	5.86146	3.8404	4.4444
ENSBTAG00000011080	TLX1	0	0	1	0	0.827113	2.74754	4.78461	4.81975	1.01508	0.389903	0.553006	0.625952	7.53189	7.5664	7.24915	7.33766	0.0715	0.143238	0.321461	1.05965
ENSBTAG00000011098	TTLL8	0	1	0	0	8.60277	8.13563	2.61029	2.15623	8.16623	7.73618	0.644974	0.94338	1.10398	1.94944	2.96706	1.8851	0.972765	0.0888587	6.56414	4.21456
ENSBTAG00000011106	PACRG	1	0	0	0	9.02193	8.87234	7.29624	7.45059	9.71148	10.1817	0.0377712	2.31295	3.13005	2.40218	6.65368	6.05182	9.61206	9.87175	8.04625	6.72024
ENSBTAG00000011124	LHX3	0	1	1	0	1.91398	2.3375	3.76702	3.33366	3.46331	4.88993	1.7641	2.60357	2.52838	2.02978	4.22654	5.43716	13.4717	13.6549	2.04678	1.57789
ENSBTAG00000011131	NMUR2	0	1	0	0	1.70026	2.48292	0.0918363	0.1974	4.31171	5.46731	0.461056	0.56662	0.903046	1.51954	5.54415	5.32963	9.91309	9.41009	0.170591	0.816395
ENSBTAG00000011180	ACTR8	0	0	1	0	2.69588	2.74382	2.78045	2.77156	2.47185	2.52383	2.34522	2.21441	2.78003	2.88258	2.93163	2.85259	3.00593	3.00012	2.71676	2.70187
ENSBTAG00000011185	TTC23	0	0	0	1	1.91979	1.414	2.08715	2.12532	0.470284	0.497061	2.14201	1.97095	2.81688	2.88238	2.3776	2.17131	1.11375	0.935237	2.21016	2.35432
ENSBTAG00000011203	RP1	0	1	0	0	8.84851	8.9715	0.769566	0.914526	1.65404	1.79359	0.63664	0.505799	0.148977	0.0646812	3.9244	3.01845	4.76579	4.98944	7.80051	6.14082
ENSBTAG00000011207	CNN1	0	1	0	0	6.33125	4.24804	3.55157	3.30226	2.70326	2.22161	1.14253	0.611674	3.94892	3.97375	5.38067	4.64884	1.89366	2.75048	8.23255	8.18364
ENSBTAG00000011241	HPDL	1	0	0	0	5.39905	3.04023	4.92564	4.25408	7.98666	7.81762	1.47699	0.066425	7.02621	7.52559	7.11463	6.92802	5.31684	5.4065	6.90761	4.79624
ENSBTAG00000011267	CLRN1	1	1	0	0	0.144813	0.082945	2.49779	0.970666	0.1768	0.0939975	0.74191	0.659107	0.943075	0.860272	0.767265	1.99506	5.7014	3.13965	0.541945	1.19139
ENSBTAG00000011271	SNX31	0	1	0	0	1.0871	0.0324883	6.31536	6.38105	1.95538	1.13152	2.28968	1.59925	4.34978	4.45576	12.2108	12.0843	8.7114	8.86384	6.41253	7.44647
ENSBTAG00000011312	NKX2-4	0	1	1	0	0.0242683	0.107993	0.227249	0.331785	6.46839	7.57378	0.596464	0.701	0.797629	0.902165	0.714629	2.32667	4.31762	3.57082	0.0513588	0.155895
ENSBTAG00000011315	GJA10	1	0	0	0	4.31146	4.41818	3.40358	3.58144	3.78214	3.68527	0.0851838	2.09767	1.37204	0.935735	3.48886	5.06152	5.01134	5.33147	4.17712	4.57842
ENSBTAG00000011366	ST8SIA6	1	0	0	0	2.96398	6.81278	0.063845	1.42791	5.49787	6.59445	0.205335	1.08626	0.18218	0.587189	0.851025	2.21031	6.78581	7.25582	1.02069	2.7751
ENSBTAG00000011367	LIN7A	1	0	0	0	8.53619	9.05109	9.91148	10.1371	10.2811	10.3743	4.03004	6.02539	6.88672	6.7468	8.23679	8.4503	9.45543	9.67226	8.00929	8.02458
ENSBTAG00000011375	SHC3	1	0	0	0	2.85593	2.88599	1.53112	0.952631	11.9883	12.0787	0.708198	0.0933913	2.1312	4.13777	5.06394	3.94856	7.85412	8.17544	5.18304	4.44342
ENSBTAG00000011379	KCNH5	1	0	0	0	1.13121	3.78907	5.18748	4.74254	10.3374	10.7425	0.602343	0.797671	1.9398	2.58432	1.74037	3.54613	9.74433	9.86275	0.0572375	0.252566
ENSBTAG00000011381	SLC30A3	1	0	0	0	4.54653	7.94904	2.97376	2.76763	8.90612	9.37834	3.329	3.98152	7.30457	6.84916	7.10267	6.97694	1.14988	2.86658	3.02509	6.10007
ENSBTAG00000011384	TBX5	0	1	1	0	2.84096	1.98487	7.28055	7.9769	2.29782	3.63272	0.572965	0.549979	1.81214	1.08367	2.03255	1.37166	0.11665	0.0564988	0.871115	0.275009
ENSBTAG00000011390	CHRND	1	0	0	0	5.83419	2.40146	1.54983	0.148601	3.99827	3.71067	5.3564	3.48346	10.9707	11.6034	4.12411	3.38105	5.93467	5.51449	4.90088	1.83857
ENSBTAG00000011392	MYBPC1	1	1	0	0	6.21734	8.25574	7.96424	5.69895	4.80786	7.08292	8.19088	8.3483	19.4735	19.5821	8.4604	7.43383	8.68841	9.0891	7.32141	7.00592
ENSBTAG00000011427	MGC151671	1	0	0	0	6.76866	6.42672	3.667	2.31768	9.71578	9.61914	1.17112	0.11956	1.53934	1.09916	3.15068	1.84472	8.4362	7.986	5.87111	3.11731
ENSBTAG00000011463	MID1IP1	0	0	0	1	2.7082	2.92197	3.07872	3.43	5.63244	5.83389	3.65383	3.68467	5.66953	5.82346	3.8423	3.88583	3.70556	3.69459	2.87317	3.1764
ENSBTAG00000011476	HOXA9	0	1	1	0	12.2096	11.3591	11.8853	11.6766	2.26848	1.85628	4.2638	3.99508	10.8954	10.7592	6.8325	6.46382	3.75653	3.64068	12.7858	12.6232
ENSBTAG00000011487	PLEKHS1	1	0	0	0	9.40683	8.96215	2.55456	3.68985	2.16193	3.04732	4.7585	4.52911	1.69346	2.72103	3.7029	1.96259	4.6157	4.49231	8.07145	6.27897
ENSBTAG00000011500	CASQ2	1	0	0	0	3.72312	4.05828	3.93711	1.39226	8.65427	8.51254	1.07608	1.03449	11.9254	11.5728	3.57911	4.22558	1.42906	3.19953	4.77307	4.1366
ENSBTAG00000011521	F1MQN3	1	1	0	0	2.03004	6.63522	1.22106	0.860419	0.0743188	0.359924	0.639429	0.925034	0.840594	1.1262	0.0470337	0.332639	0.12794	0.427309	1.24763	3.98008
ENSBTAG00000011541	RBL1	0	0	1	1	2.46407	2.55628	1.1423	1.34502	0.940462	0.866069	0.488791	0.525444	0.503916	0.543578	2.67262	2.73853	1.95021	1.87874	2.43996	1.83913
ENSBTAG00000011548	AMPD1	1	1	0	0	4.64308	5.82919	5.96895	5.77183	0.933316	3.69695	5.23798	4.43847	15.9605	15.9516	5.59295	5.38549	5.65128	6.01412	4.82398	4.67943
ENSBTAG00000011578	CD44	0	0	0	1	2.25557	0.833203	3.74005	3.31113	2.00315	2.29857	1.53709	1.39036	2.05248	2.22322	2.60889	2.49954	3.38034	3.39386	3.03727	2.59396
ENSBTAG00000011579	CHRM1	1	0	0	0	7.10927	6.74678	3.7714	3.20477	8.89713	8.86051	2.61828	3.48598	0.0578975	1.47893	5.51311	5.51641	4.9016	5.24278	6.00409	6.35929
ENSBTAG00000011587	C10orf90	1	0	0	0	4.40949	7.37299	0.0284425	0.353514	12.4367	13.0532	1.42821	1.71304	1.79049	1.98025	4.08254	5.36524	3.46119	4.22177	1.89346	4.44263
ENSBTAG00000011598	SOX2	0	0	1	0	1.75382	3.59599	2.83438	1.80438	13.4225	13.5505	0.971464	1.31618	2.62032	1.41016	5.44803	5.89625	12.5092	12.0725	2.50173	2.45672
ENSBTAG00000011616	MPO	0	0	0	1	1.40423	1.41145	2.75778	3.56311	5.99743	6.90822	7.77356	7.75461	0.773876	0.863465	1.90848	1.27927	0.0801033	0.185565	2.48965	3.43391
ENSBTAG00000011621	IZUMO1	0	1	0	0	8.09768	9.36974	6.96651	6.69042	3.07162	3.85901	2.51339	1.37283	1.37955	2.90598	3.25911	4.90437	0.0712017	0.253356	5.51651	6.68455
ENSBTAG00000011623	VMP1	0	0	0	1	3.23954	3.4825	4.3155	4.29563	3.42195	3.5526	3.68105	3.697	2.32326	2.35069	3.76249	3.79944	2.49165	2.62234	2.83664	2.8214
ENSBTAG00000011624	FGF21	1	0	0	0	6.88382	6.41895	4.32977	6.04181	4.15971	4.55163	12.4105	10.9363	2.27327	1.20369	5.44339	4.08579	3.82873	0.0451262	6.20191	5.67465
ENSBTAG00000011635	CENPN	1	0	0	0	2.95597	1.77969	1.70655	1.62958	1.7121	0.913596	3.5687	3.1431	2.1793	1.64473	5.91252	5.58725	3.45719	3.18486	3.82513	1.54958
ENSBTAG00000011642	RBM27	0	0	0	1	2.42155	2.8244	1.95901	2.01516	1.83427	1.90412	1.8319	1.8109	2.08569	2.14501	2.38335	2.42304	2.62071	2.62299	2.43691	2.32253
ENSBTAG00000011660	MSMB	0	1	0	0	0.459343	1.6642	0.184081	0.176965	3.08208	2.19786	9.65349	8.94384	0.754461	0.747345	9.32656	9.56614	4.46862	3.99543	0.379601	1.16046
ENSBTAG00000011666	THRSP	0	1	0	0	2.09162	1.3438	10.9665	11.4892	2.55834	2.60968	3.17427	3.55173	3.47484	2.89003	0.902012	1.24182	1.43995	1.31512	1.41036	1.37473
ENSBTAG00000011672	GABRR1	1	0	0	0	3.42618	2.68245	3.3065	2.78764	6.16636	6.5876	4.22832	3.18867	4.64928	5.25455	1.62797	3.32345	4.74729	4.22016	3.77522	2.63883
ENSBTAG00000011682	GLI2	0	0	1	0	6.46539	5.55845	5.01465	4.89497	3.62725	3.56084	0.629954	1.00074	4.16296	4.01944	7.23957	7.07038	3.81954	3.79731	7.04884	7.42563
ENSBTAG00000011719	HCRTR2	1	1	0	0	0.925328	3.17113	0.211492	0.387955	10.341	10.6424	0.857653	1.62167	0.781878	0.958341	0.242958	0.95966	1.95775	2.50903	0.0356025	0.212065
ENSBTAG00000011720	HSD17B6	1	0	0	0	9.1735	9.8256	5.71645	7.85152	4.61582	5.73303	16.2822	16.3001	6.59251	5.85076	4.43727	6.36609	8.24422	8.33647	7.52997	7.3951
ENSBTAG00000011731	PNMT	1	0	0	0	6.15357	8.13041	3.58794	3.66617	0.791905	1.89613	0.778275	1.07061	9.68464	9.38423	8.18337	8.11537	2.70055	3.28858	3.29223	6.83085
ENSBTAG00000011734	ANKRD1	1	1	0	0	5.60786	7.19745	6.36094	6.40836	3.72348	5.90218	7.47492	7.83641	17.6427	17.4994	10.9008	10.5663	7.66598	7.73379	6.10558	6.86075
ENSBTAG00000011736	IGF2BP1	1	0	0	0	1.70253	5.56332	0.298876	0.655964	0.767901	2.53566	7.67108	7.70596	2.15896	3.06372	0.0757012	0.432789	0.45572	1.33117	2.17455	4.0715
ENSBTAG00000011740	OPALIN	1	0	0	0	4.39901	4.43116	2.14732	1.576	14.1163	14.4337	1.84347	1.76359	1.7776	4.12457	7.23148	7.50343	5.84554	6.41203	1.84355	2.43188
ENSBTAG00000011741	COL13A1	0	1	0	0	5.10719	3.39237	1.32435	0.812726	1.77405	1.26015	1.85057	1.679	1.22729	1.78292	3.91083	3.99555	1.9231	2.17125	5.74854	5.98698
ENSBTAG00000011743	TLL2	0	1	0	0	6.02908	6.5326	4.41136	4.5259	3.75316	4.8282	3.20584	3.01419	3.66351	4.25742	12.1902	12.1289	9.31321	9.66712	6.01466	6.33822
ENSBTAG00000011752	SYNM	0	0	0	1	2.53275	1.33886	2.49923	2.66238	2.59836	2.6463	0.653768	0.449075	7.1421	7.16418	2.38727	2.05439	1.02554	0.983276	3.53177	3.6615
ENSBTAG00000011782	CHGB	0	1	0	0	5.72625	6.45107	6.76323	6.32437	14.5641	14.8646	6.27289	5.75463	7.47914	7.34823	7.46226	8.51375	17.1249	16.838	6.54709	6.44996
ENSBTAG00000011783	LOC520682	1	0	0	0	5.15686	5.77371	3.41574	0.652157	4.75666	5.20086	1.63453	3.3339	0.0313563	0.945891	2.6025	3.57983	5.41613	4.7726	1.68351	4.57242
ENSBTAG00000011804	ARNTL2	1	0	1	0	6.55773	2.59836	3.29723	1.65297	8.28478	7.81938	0.366895	0.0535412	1.37589	0.513491	6.99364	7.02565	10.075	9.62694	10.4255	9.11041
ENSBTAG00000011816	TBX10	0	0	1	0	4.94586	5.04798	5.66066	5.87386	4.25389	4.23917	5.20994	5.59455	4.84138	3.20605	6.74545	6.65926	5.51811	5.31742	5.73178	6.52207
ENSBTAG00000011817	GABRA2	1	0	0	0	4.80442	0.932657	3.46394	1.46405	11.9298	11.5974	1.77435	2.07657	0.398925	0.0599825	8.05528	6.88446	8.72388	8.84821	3.70095	1.47037
ENSBTAG00000011818	EMID2	1	0	0	0	10.8993	10.091	3.60938	1.66431	8.65537	8.3056	3.43133	3.80259	1.41204	1.17872	8.16166	8.13548	5.52668	4.83331	8.37728	6.55253
ENSBTAG00000011820	DAPK2	0	0	0	1	2.1986	2.99085	1.81595	2.19948	2.89113	3.01877	5.65162	5.7453	6.09993	6.17814	1.53866	1.63322	1.96211	2.31326	0.826013	0.594188
ENSBTAG00000011829	NF1	0	0	1	0	1.85702	1.99749	1.08713	1.30541	2.44735	2.64399	0.767088	0.808089	0.403985	0.717806	2.05099	2.12949	1.72191	1.79436	2.10263	2.13145
ENSBTAG00000011833	GRIA3	1	0	0	0	7.07884	9.07793	5.32208	5.73431	11.671	11.8718	1.28257	2.923	6.4477	6.77142	8.37991	9.00283	8.20541	8.32293	7.19468	8.06434
ENSBTAG00000011857	PPM1H	0	0	0	1	5.09884	6.72154	3.66542	4.06219	4.55639	4.92041	4.95149	5.20656	0.680876	1.1597	3.12694	3.50554	4.57011	4.79384	4.32661	5.02302
ENSBTAG00000011869	CSRP3	0	1	0	0	6.54812	7.79495	8.14968	7.31621	6.11394	7.69068	7.2897	7.44428	18.307	18.3246	12.0889	11.8207	8.07471	8.04026	5.82446	6.94632
ENSBTAG00000011871	BTLA	1	0	0	0	1.40612	2.87707	2.70378	4.92374	0.821767	1.96882	6.14075	6.74118	1.3307	1.52632	3.04041	2.62866	2.12632	4.68783	2.24131	3.11193
ENSBTAG00000011873	KCNE3	1	0	0	0	10.7148	7.52368	10.0677	9.12214	4.81119	4.03402	3.90646	1.19526	7.82007	5.75342	9.43205	8.43911	4.28206	5.04655	10.3921	7.9692
ENSBTAG00000011874	TMEM252	1	0	0	0	3.84762	2.31595	2.78305	0.800376	0.27995	0.902732	0.474735	0.311841	3.33737	2.42623	1.05483	0.0950563	2.38758	2.32366	3.58319	4.01699
ENSBTAG00000011899	USP4	0	0	0	1	6.38371	6.39392	6.92467	6.89765	6.12995	6.26399	6.10503	6.07455	6.39548	6.48048	6.36456	6.33112	5.97615	5.97943	6.57585	6.45966
ENSBTAG00000011910	STK33	1	0	0	0	9.77939	9.80782	4.75468	4.64905	8.54123	8.7869	0.944806	2.8165	1.2258	1.17964	7.955	7.85308	10.7263	10.8165	9.20569	8.3161
ENSBTAG00000011939	LY6H	1	0	0	0	3.82988	6.69319	1.16646	3.14351	13.2421	14.1107	0.97249	2.0773	1.37207	2.43276	0.0798838	3.39349	10.6215	10.9754	1.12246	3.32874
ENSBTAG00000011941	LYZ1	1	1	0	0	10.5997	13.1771	2.04211	1.19812	1.55236	2.22722	1.06635	2.5059	0.618273	3.27927	2.13638	3.49458	2.61663	4.56255	7.2621	7.61517
ENSBTAG00000011944	MTTP	1	0	0	0	3.52875	3.73656	1.86955	3.7613	2.94399	3.85617	12.7066	12.9717	4.81646	5.5214	3.4545	4.09574	5.28629	5.10148	5.17164	5.35125
ENSBTAG00000011991	DRGX	1	0	1	0	1.08294	0.219285	1.58187	2.22039	3.6141	5.46579	7.04801	6.87706	1.43058	0.884854	2.04138	1.28777	0.117245	0.882097	0.430323	2.02964
ENSBTAG00000011995	CTRA	0	1	0	0	0.081805	0.143135	0.295863	0.330151	5.62035	5.38473	2.03191	2.04363	1.20531	1.95896	10.325	10.079	7.80512	8.25217	0.119972	0.154261
ENSBTAG00000012015	FSIP1	1	0	0	0	9.44093	9.02833	2.58896	1.52671	8.40064	8.32293	1.58093	0.711618	0.273756	1.34464	6.60261	5.30589	10.4459	10.3695	8.71819	6.98471
ENSBTAG00000012023	GPX6	1	1	0	0	6.50744	5.7778	1.09242	0.20215	1.73943	2.38305	0.428986	0.240555	0.630151	0.44172	8.66706	8.10534	6.01392	3.54496	5.94658	5.12013
ENSBTAG00000012029	KLRB1	1	0	0	0	8.53675	7.98834	8.19193	7.77917	0.86373	0.160827	10.1404	10.3453	2.103	5.50629	8.41179	8.62471	4.84889	2.32667	5.94218	6.95972
ENSBTAG00000012034	KRT4	0	1	0	0	1.22408	0.443605	0.971097	2.47332	2.23744	1.83715	1.43622	0.915284	8.73041	8.38563	0.590977	1.76024	9.85151	9.30954	0.0962375	0.115539
ENSBTAG00000012036	HR	0	0	1	0	4.25712	3.8978	3.61774	3.42178	6.39426	6.51375	0.547169	0.526558	4.08227	3.81736	1.77222	2.06262	6.17812	6.22831	4.40735	4.13953
ENSBTAG00000012043	PADI3	0	1	0	0	0.123455	0.052275	1.02391	0.510264	0.451346	1.1001	0.692886	0.655159	1.67533	1.10661	0.539991	1.43469	7.07531	6.20474	1.04125	0.396279
ENSBTAG00000012053	ACCSL	0	1	0	0	4.73636	2.3725	1.08088	1.47182	6.63357	7.29399	2.04599	1.46321	1.69479	2.26923	8.65931	8.33367	0.995237	0.75787	5.36541	3.85363
ENSBTAG00000012054	ALDH3B2	1	0	0	0	6.34763	6.79348	0.824769	1.7416	1.92308	4.42619	0.0473512	1.03433	0.515036	2.06746	7.4096	7.9176	6.04766	7.44038	4.90461	6.42816
ENSBTAG00000012057	GIF	1	0	0	0	2.46754	3.23167	0.855114	1.04942	3.97113	4.10491	0.224674	1.00185	1.05657	0.669067	1.82766	3.90159	0.611593	2.82989	2.41187	2.45282
ENSBTAG00000012061	POU3F1	0	0	1	0	1.97011	2.47775	2.8798	3.24114	12.2042	12.142	0.166909	0.148279	4.15928	4.00407	4.7616	3.66102	3.50164	3.71554	0.852071	0.822507
ENSBTAG00000012071	ASGR1	0	1	0	0	3.19575	3.33827	9.90673	9.94644	0.889925	1.28035	11.7757	11.7472	4.09154	3.18429	2.53229	2.87228	1.45774	1.21729	2.35939	2.29625
ENSBTAG00000012079	MYLK4	1	0	0	0	1.44321	0.28926	1.92494	3.67864	6.50593	6.23566	10.6197	11.096	10.6456	10.4691	8.08639	7.89875	6.3333	5.97519	0.842701	0.115017
ENSBTAG00000012083	IRX3	0	0	1	0	2.76763	2.39672	3.90375	3.97051	2.40313	2.13065	1.00909	0.337577	1.35585	1.29489	2.79721	2.24846	1.83003	1.95223	2.11865	1.58767
ENSBTAG00000012109	EDN3	0	0	0	1	8.24753	8.88066	3.71816	4.42863	8.74116	9.15171	0.769764	2.19002	5.23725	5.65704	8.04576	7.67391	5.52202	5.51515	7.72625	8.09082
ENSBTAG00000012116	HNF4A	1	0	1	0	6.33424	6.66717	9.58163	10.1934	1.66246	2.42457	14.5871	14.6247	5.16339	3.33024	2.15534	3.98209	3.76973	2.11283	6.22933	5.50731
ENSBTAG00000012149	HOXC8	0	1	1	0	9.01015	9.5331	13.2628	13.7072	0.771938	0.824705	1.55315	1.57096	13.7085	13.9826	11.4372	11.2363	2.41986	3.95469	10.0853	9.36997
ENSBTAG00000012158	C16H1orf158	0	1	0	0	10.2514	10.1023	1.01597	0.0475988	7.77669	8.78972	0.269525	0.0594138	0.47069	0.260579	5.26684	3.31046	1.49667	1.26137	8.54967	5.90653
ENSBTAG00000012210	C5	1	0	0	0	9.04215	7.43654	5.30063	6.90611	2.7911	2.61449	16.0425	15.8101	5.72997	3.38051	5.37987	5.85356	5.49849	4.41009	9.70613	7.39837
ENSBTAG00000012211	HOXA5	0	0	1	0	11.404	10.7797	11.6805	11.3583	2.1374	2.05781	8.07202	7.97617	9.4468	9.2899	7.70112	7.10133	3.81215	2.77931	12.1447	12.1136
ENSBTAG00000012217	PLA2G2F	1	1	0	0	9.29956	9.50098	1.25916	0.513849	3.81873	3.53067	0.79431	0.552646	0.593605	1.25178	4.61514	4.16284	5.2567	3.5662	8.7536	4.97507
ENSBTAG00000012246	ANO2	1	0	0	0	3.96476	1.53759	3.15165	3.57878	5.6216	6.05976	0.6509	1.17099	4.01242	4.02818	4.16751	3.3704	2.13352	3.34622	5.16073	3.08527
ENSBTAG00000012254	LAPTM4B	1	0	0	0	2.07533	0.669683	1.51399	0.579757	2.88121	0.884607	2.72342	3.22243	2.94163	3.55281	2.70479	0.809547	0.446128	0.135993	5.11013	3.94109
ENSBTAG00000012262	FBXO10	0	0	0	1	2.13216	1.62368	3.42359	3.33937	3.99389	4.0291	0.153836	0.26162	1.35615	1.45194	3.41691	3.64091	5.0049	4.89893	2.56512	2.59079
ENSBTAG00000012276	RPL5	1	0	0	0	1.4453	0.951208	2.84682	4.39011	4.32884	2.66402	3.37201	2.86131	4.70076	5.40096	4.84534	3.92097	4.9703	4.80463	3.93014	3.2054
ENSBTAG00000012285	ESRRB	0	0	1	0	2.6118	1.79076	0.676246	2.01539	6.87758	7.27313	4.56131	5.58503	10.0146	9.85956	2.11783	1.49966	6.07251	4.52443	0.150231	0.746561
ENSBTAG00000012290	SCNN1B	1	0	0	0	8.48871	6.5645	0.712925	0.0544012	9.09184	9.20325	0.576068	0.949717	0.777232	1.15088	4.01438	4.89244	10.7119	10.6087	5.9335	2.55708
ENSBTAG00000012296	GABRG1	1	0	0	0	6.04309	3.57561	3.62951	1.32222	12.2682	12.4473	0.938211	0.746339	0.538969	1.75719	6.91288	6.98645	9.69206	9.27535	7.79247	7.3231
ENSBTAG00000012311	CACNG5	1	0	0	0	9.25649	9.16499	0.92647	0.221496	11.6944	12.0722	1.06335	3.258	3.30284	3.63239	3.72548	5.78649	10.6105	9.88476	8.23574	7.62844
ENSBTAG00000012319	KCNE1L	0	1	0	0	4.08726	3.23503	4.24344	4.4477	8.98311	9.38148	1.26144	2.08541	6.51279	7.08821	11.3729	11.0764	6.3802	5.90921	4.61399	4.28479
ENSBTAG00000012328	GHRL	0	1	0	0	2.2361	3.24402	1.31081	1.55395	0.108561	1.02933	1.43887	0.814736	1.94051	2.07898	4.56968	4.69788	0.272087	1.31279	0.168226	1.17314
ENSBTAG00000012368	IL21	1	1	0	0	0.182932	0.0346583	0.38168	0.277963	0.185785	0.0820675	2.32527	2.20081	0.95206	0.848342	1.36682	0.441873	0.719527	1.3896	2.77699	0.925758
ENSBTAG00000012374	C2orf54	1	1	0	0	9.84647	9.00564	1.54368	0.838749	2.29379	4.29329	1.13668	0.890806	0.260195	0.058525	4.7991	2.76424	6.43165	5.83696	8.63762	5.82144
ENSBTAG00000012398	APOC3	1	0	0	0	2.07101	2.42014	2.27259	4.6116	2.334	2.61671	13.9621	14.1425	3.65162	2.46018	2.272	3.539	4.33745	4.23679	3.7206	3.48306
ENSBTAG00000012407	FOXA2	0	1	1	0	11.4782	12.0867	3.57778	3.50222	3.80438	5.17534	13.2667	13.1796	1.45345	1.58916	4.4782	3.7113	0.131813	1.79164	11.031	10.6323
ENSBTAG00000012460	ELF5	1	0	1	1	10.2394	9.29721	5.1047	5.3917	1.71116	0.722594	8.28642	8.17835	1.18803	0.229255	3.10333	1.81857	4.02134	2.6193	8.05593	3.95271
ENSBTAG00000012461	PRSS16	1	1	0	0	12.4271	13.6901	1.72487	2.0649	5.89306	6.46667	4.27175	3.54038	3.08405	2.89426	1.30275	1.02755	1.57881	3.138	12.666	13.2336
ENSBTAG00000012471	ILF2	0	0	1	1	8.62673	8.57005	8.0707	7.78515	7.87073	7.88579	7.95761	7.85164	8.31677	8.21824	8.96639	8.81603	8.37271	8.30359	8.92583	8.36729
ENSBTAG00000012478	ALOXE3	1	0	0	0	4.84439	4.72107	1.12162	2.11482	6.62902	6.57663	0.849708	2.22331	2.4492	1.95623	2.91473	2.57106	1.05005	2.92924	3.52869	4.48245
ENSBTAG00000012498	PAX5	1	0	1	0	0.101858	0.379662	3.24642	3.53672	9.81032	10.6331	5.93916	6.8158	2.38244	3.26622	1.14368	3.65893	8.28443	8.27259	2.93572	3.77886
ENSBTAG00000012500	RARA	0	0	1	0	3.42518	3.1501	3.58925	3.58422	0.957963	1.01726	4.06557	3.91208	2.30617	2.31333	3.74625	3.50948	2.10336	1.98328	3.29617	3.1105
ENSBTAG00000012507	PDZD3	1	0	0	0	5.96773	5.07147	8.3838	8.15223	3.18403	1.50066	4.57405	4.19227	3.56501	1.89406	4.68133	4.15162	6.36246	5.57662	5.7668	4.89503
ENSBTAG00000012538	KLK14	0	1	0	0	2.73129	4.80129	9.12502	7.86486	6.02173	5.63564	2.14553	0.57876	4.67701	3.81936	2.11	1.3027	1.30415	0.898535	2.95863	3.58403
ENSBTAG00000012563	FGF4	0	1	0	0	0.0454367	0.0611483	0.272976	0.282133	0.0770862	0.0862425	0.642196	0.651353	2.13079	1.26495	0.542476	1.59687	0.13918	0.174728	0.0970913	0.106247
ENSBTAG00000012590	PAPL	0	1	0	0	0.04707	0.0584633	1.18811	0.587925	4.70987	5.68948	0.891792	1.50066	0.822817	0.858565	1.21958	1.15963	1.31913	0.51536	1.64967	2.22733
ENSBTAG00000012599	SMAD3	0	0	1	0	2.97678	2.88851	3.07937	3.12518	1.51404	1.52248	1.98683	1.9586	2.76626	2.70669	3.7379	3.7249	2.99491	2.64781	2.55024	2.49633
ENSBTAG00000012601	TEKT4	1	1	0	0	9.46513	9.27369	0.289781	0.0662288	4.02814	5.74084	0.659001	0.435449	1.72466	0.913554	4.60716	2.35545	7.10349	6.36959	7.81088	4.6596
ENSBTAG00000012605	GPR157	1	0	0	0	6.43534	5.87142	6.19355	5.77742	3.33672	3.8858	0.786856	2.44747	10.7193	10.885	6.30858	6.01797	3.88275	3.36572	6.24514	5.70791
ENSBTAG00000012621	RTN4RL2	1	0	0	0	7.09036	7.86088	4.57532	3.78375	4.77671	2.74822	3.24503	3.46543	0.739299	0.902589	3.48206	3.98741	4.61265	4.97263	5.70426	5.59645
ENSBTAG00000012624	PDZRN4	1	0	0	0	7.07972	5.9135	4.00783	4.78019	9.18605	9.32706	1.86744	1.16852	2.50577	5.12122	7.35925	7.21554	8.28599	8.06754	6.8687	5.25826
ENSBTAG00000012640	S100A8	1	0	0	0	3.79841	0.0903567	10.3366	11.4164	7.45232	7.16599	9.12833	9.23546	6.94044	5.80113	5.5644	6.88687	5.06196	6.97602	5.13526	4.332
ENSBTAG00000012653	CAMK2B	1	0	0	0	3.42064	7.45355	1.8157	2.21246	9.76126	10.1379	0.954778	1.43935	10.1603	10.5331	2.59259	3.40951	8.54748	8.9558	3.41661	7.19154
ENSBTAG00000012656	OVOL1	0	1	1	0	10.1584	11.3607	0.490225	0.702462	4.96342	5.37993	0.126235	0.629875	2.68211	2.24555	5.33099	6.23293	4.80748	4.51902	8.85541	7.60081
ENSBTAG00000012672	ZNHIT3	0	0	1	0	2.80082	2.73631	3.22991	3.11369	2.76356	2.62045	3.12095	3.07694	2.29261	2.39039	2.81837	2.65573	2.845	2.78778	2.7994	2.71111
ENSBTAG00000012676	KRT79	0	1	0	0	0.0702933	0.123865	8.59409	9.44532	1.67081	2.53949	0.645119	0.714756	2.13577	1.32901	0.0527237	0.122361	0.442303	1.04398	1.28638	1.39626
ENSBTAG00000012706	RTP1	0	1	0	0	0.0593183	0.092645	0.275561	0.302066	8.84844	9.30731	0.644781	0.671286	0.845946	0.872451	1.11082	0.417961	1.94125	1.82855	0.491116	1.3481
ENSBTAG00000012710	GHRH	1	0	0	0	6.84275	1.99254	0.296561	0.0732975	3.20321	5.28414	1.89035	0.834807	1.26493	1.88603	1.35239	0.259852	0.781277	1.6157	4.32153	1.24316
ENSBTAG00000012748	MAGEA10	1	0	0	0	1.44962	0.337485	0.258018	0.08493	5.18307	3.3029	0.627238	0.45415	0.828402	0.655315	5.62406	5.30276	0.492017	1.04418	2.81082	1.6555
ENSBTAG00000012750	UPK2	1	0	0	0	1.46797	1.24873	1.07692	2.10569	3.21936	5.51997	0.962234	0.994676	0.390267	1.96119	2.42511	3.20719	2.37089	1.33753	3.51798	0.460229
ENSBTAG00000012780	LPO	1	0	0	0	3.25312	0.379672	0.702416	1.09854	6.22818	6.87401	3.96728	3.56738	1.0732	0.844044	4.42132	4.07011	4.16615	2.1498	4.03223	2.09462
ENSBTAG00000012782	AQP6	1	0	0	0	5.95163	1.46836	1.16953	1.04131	5.60056	4.93987	0.286629	0.0779263	0.882574	1.51143	1.45466	1.02438	7.13467	6.7781	7.29599	6.4214
ENSBTAG00000012794	PAH	1	0	0	0	7.56721	6.80337	7.45255	9.20653	10.1227	10.3237	18.138	18.3393	7.92281	6.36085	7.81594	8.60844	10.8926	10.8609	8.20222	8.03697
ENSBTAG00000012801	UPP2	1	0	0	0	2.89004	3.29021	1.99358	4.00987	5.30034	5.11863	12.6927	12.5511	2.23742	1.4431	2.10298	2.50405	4.48163	4.57	3.63454	2.9964
ENSBTAG00000012818	PDLIM5	0	0	0	1	3.29852	3.49449	2.6595	2.7129	2.74746	2.82171	3.40725	3.44483	7.71593	7.73196	2.14492	2.3705	3.15681	3.28237	3.08404	3.02811
ENSBTAG00000012822	MGC137036	1	0	0	0	7.42413	7.26321	8.8894	9.08254	6.85989	6.96879	9.64294	9.80445	6.29932	6.47023	7.35628	7.16465	1.22328	3.90992	6.96749	6.49996
ENSBTAG00000012838	RDH12	1	0	0	0	3.86846	0.493087	1.69078	1.36413	9.71172	9.27371	2.7458	0.508109	0.915693	0.0585538	6.14102	5.62648	7.04562	6.94237	4.07729	3.186
ENSBTAG00000012855	LPL	0	1	0	0	3.41898	3.83315	9.69734	10.0417	1.51602	0.816596	2.54101	2.65623	6.24476	5.81801	6.06858	6.3309	1.24967	1.02561	4.58334	4.77623
ENSBTAG00000012861	KIF4A	1	0	0	0	2.69824	1.20882	0.841755	0.920637	1.18268	1.03043	0.826064	0.719519	3.9588	3.80365	5.26417	4.91632	0.984218	0.998166	3.58048	1.61003
ENSBTAG00000012884	MPTX	1	1	0	0	13.0198	14.5446	2.0325	3.38282	1.32689	3.28297	4.32723	4.64795	2.57277	1.94146	1.79135	0.910915	1.07075	1.23757	13.2545	13.8907
ENSBTAG00000012888	C2H2orf80	1	0	0	0	1.66633	6.1895	0.256309	1.33809	11.7038	12.4301	0.638924	1.74913	3.81837	3.83598	0.0798087	1.26061	7.27199	7.76862	0.684184	3.0469
ENSBTAG00000012896	METTL7B	1	0	0	0	3.11254	3.4428	6.12661	7.65729	1.78965	2.28423	16.8501	16.9959	10.3479	10.2498	4.00577	5.46163	5.26568	3.11625	5.54256	5.43869
ENSBTAG00000012912	ERMN	1	1	0	0	5.61342	5.52036	2.80459	1.75721	14.9192	14.9858	2.21889	2.25764	1.46532	3.613	2.05498	2.18361	5.51406	7.27517	2.86663	2.2112
ENSBTAG00000012946	HSF2	0	0	1	0	3.33666	2.71186	2.44733	2.30577	2.63713	2.56017	1.94025	1.79629	3.34155	3.15577	3.24335	3.26917	4.20455	3.99156	3.91824	3.47822
ENSBTAG00000012997	SMPDL3B	1	0	0	0	8.73707	9.80987	6.71331	6.66043	3.63992	1.7072	9.82684	9.67271	4.51503	3.95145	6.80911	6.85558	7.83382	7.78939	7.644	6.8215
ENSBTAG00000012998	NAA30	0	0	0	1	2.76326	3.00535	3.09126	3.14958	2.95837	3.01522	3.04277	2.88234	4.3909	4.56643	3.01377	3.12915	2.78861	2.79791	2.93436	2.99523
ENSBTAG00000013002	GABRQ	1	0	0	0	5.28937	3.36012	1.52988	0.835591	7.15177	9.4986	0.946399	1.49128	3.5148	4.18619	4.0696	3.84772	8.40075	8.355	6.20707	6.00427
ENSBTAG00000013008	PMCH	1	0	0	0	7.33758	7.66884	5.87508	5.96422	9.32937	12.8968	3.82108	3.83236	2.88557	5.79493	7.92783	7.8122	6.02516	6.24543	6.64378	7.03008
ENSBTAG00000013009	AURKA	0	1	0	0	1.74131	0.852737	0.873906	0.991549	0.80615	0.897192	1.01235	1.16645	0.885173	1.11121	4.12169	3.74771	0.773686	0.614544	2.28147	1.30297
ENSBTAG00000013014	GPR61	1	0	0	0	4.65462	5.25131	1.47179	2.97515	9.579	9.90914	2.24481	1.7649	0.0608575	1.84515	3.65313	5.00975	9.53313	9.80832	4.10989	4.22223
ENSBTAG00000013035	SIX6	1	1	1	0	0.141098	2.63061	4.51735	3.98899	4.21701	7.43812	0.750359	3.11322	3.25215	4.35559	5.52663	6.84901	14.2101	14.8423	2.14736	2.34407
ENSBTAG00000013050	ZNF277	0	0	1	0	4.16866	3.84957	3.5567	3.9405	2.72702	2.6803	3.01071	3.20102	2.91886	3.35579	4.55155	4.69015	3.41425	3.51785	4.79109	4.95029
ENSBTAG00000013051	PRM3	1	1	0	0	4.46343	4.50454	1.11597	0.25622	2.44107	0.547575	0.226179	0.22211	0.427344	0.423275	1.64699	1.54326	0.81018	2.65969	2.30363	3.27008
ENSBTAG00000013077	SATL1	1	0	0	0	0.0770417	0.169712	0.73521	1.85258	0.478525	1.46691	1.84522	1.16529	2.07349	1.37515	0.808465	2.55473	2.21633	2.00754	0.488895	1.45684
ENSBTAG00000013079	BORIS	1	0	0	0	3.41792	1.06252	5.00828	4.16504	1.74879	2.99193	1.07661	1.01828	4.34189	4.45947	4.64713	4.5395	2.69179	3.86886	4.44733	4.74568
ENSBTAG00000013090	NODAL	0	1	0	0	1.64598	0.514195	9.94607	9.85944	0.175799	0.942711	1.41295	0.827539	2.29907	3.24122	4.35645	4.16577	1.56308	1.59654	2.94481	5.25191
ENSBTAG00000013100	SPAG5	1	0	0	0	3.33407	1.4734	2.35069	2.74379	3.5694	3.20591	1.8774	1.54728	1.01568	1.18573	6.50026	6.19421	2.20932	2.39725	4.33969	2.08923
ENSBTAG00000013116	PLCB4	0	0	0	1	3.04871	2.91012	2.31226	2.3455	2.49231	2.60895	0.960407	0.963035	1.92014	2.0522	3.7899	3.64473	2.72643	2.78245	3.87697	4.19304
ENSBTAG00000013118	CD86	0	0	0	1	1.44025	0.725102	3.59298	3.44937	2.3552	2.58905	3.60936	3.52173	1.14687	1.07781	1.94436	2.0471	1.92255	1.86066	0.987867	1.20971
ENSBTAG00000013134	SOST	1	0	0	0	4.54682	3.04801	5.88518	6.3081	7.48262	7.4362	0.932473	1.66644	6.75112	7.32756	5.66541	4.90636	8.01645	8.15436	2.48435	4.49369
ENSBTAG00000013178	ALAS2	1	0	0	0	2.04583	2.4937	4.51469	4.66236	5.42792	5.85623	3.24734	3.81825	4.41221	4.10361	0.791044	2.72537	1.08524	2.36279	1.3353	1.44663
ENSBTAG00000013181	C14orf166B	0	1	0	0	1.8006	0.364292	0.799843	0.233368	0.359357	1.5006	0.374177	0.347942	0.575342	0.549107	2.21681	2.407	3.70573	3.87675	0.649245	0.0655825
ENSBTAG00000013220	R3HDML	0	1	0	0	3.01704	0.946427	0.294041	0.210644	10.529	10.5382	5.84821	4.40158	0.864426	0.781029	0.399926	1.01465	0.205118	0.0973887	2.00143	2.52879
ENSBTAG00000013262	GABRA6	0	1	0	0	0.0939667	0.0477083	0.315509	0.271047	2.50527	2.48961	1.60432	0.934858	0.885894	0.841433	0.0923337	0.0478725	1.66573	1.43217	0.139619	0.0951575
ENSBTAG00000013279	FOXP3	0	0	1	1	2.3375	3.02545	2.33731	2.65595	2.54908	2.78219	3.77544	3.8042	0.876126	1.06371	0.805814	1.10818	0.404503	0.993695	1.78365	1.98024
ENSBTAG00000013282	NECAP2	0	0	0	1	4.23233	4.37978	5.17949	5.15337	4.2927	4.33871	4.66022	4.63142	3.3476	3.34975	4.59424	4.59035	3.95589	3.93693	4.07895	4.1471
ENSBTAG00000013284	SGK3	0	0	0	1	1.63901	2.61784	2.34162	2.43756	2.33331	2.52543	0.603262	0.761039	0.733167	0.926756	1.2788	1.38459	1.42618	1.53506	1.44745	1.894
ENSBTAG00000013290	DYSF	0	0	0	1	1.79501	1.74316	4.6526	4.7009	2.79956	2.92538	2.82302	2.81579	4.97785	4.97074	2.75481	3.01202	0.936827	0.697305	1.34845	1.54208
ENSBTAG00000013316	BRPF3	0	0	1	0	2.36202	2.73885	2.27877	2.49429	2.14836	2.27831	2.11688	2.00305	2.34492	2.35805	2.97147	2.95505	2.69939	2.76141	2.3326	2.65243
ENSBTAG00000013320	TSPAN1	1	1	0	0	12.7039	11.9244	4.09616	2.98189	4.42733	3.18968	4.11172	3.39549	3.12887	3.27443	6.18033	3.79046	6.87701	6.4446	11.898	9.49185
ENSBTAG00000013338	SLC7A9	1	0	0	0	1.43315	3.25247	0.333139	3.92281	5.12231	6.02895	11.4992	11.9982	1.82408	0.376653	3.19899	3.1544	2.72844	2.93145	1.22668	2.33805
ENSBTAG00000013339	NEBL	1	0	0	1	2.20953	4.70333	1.47762	1.5975	4.13974	4.32974	1.99494	2.50559	0.229539	0.708163	3.8834	4.03303	4.71295	5.00679	1.54921	2.89993
ENSBTAG00000013352	NKX2-8	0	1	1	0	0.04069	0.225345	0.258087	0.409289	10.351	10.8553	3.55254	3.81645	0.828468	0.97967	1.9069	3.05111	9.11178	9.7604	0.401902	1.23139
ENSBTAG00000013356	CATHL1	1	1	0	0	0.035515	0.156302	0.280775	0.353336	0.08488	0.157441	2.15902	2.234	1.96283	1.27984	0.057595	0.130156	1.4232	3.84778	0.104885	0.177446
ENSBTAG00000013364	LIPM	1	0	0	0	8.59588	10.3616	3.33551	4.33045	0.07912	0.243416	3.18529	5.28151	2.66745	1.59338	4.35529	4.24082	9.97608	10.2187	5.02646	5.6162
ENSBTAG00000013400	VIP	1	1	0	0	0.127787	0.34101	3.19973	4.29036	8.29878	9.71716	4.81826	5.69509	2.60864	1.64088	2.77541	2.91624	12.0394	13.3577	1.74745	2.82202
ENSBTAG00000013412	NFAT5	0	0	1	0	4.04703	4.48364	1.61531	2.08257	3.8602	3.97902	1.86862	1.98619	0.38494	0.786262	3.04667	3.51838	4.70015	4.65821	4.3758	4.14174
ENSBTAG00000013416	MGC133636	0	1	0	0	1.59558	0.486725	7.66378	7.76802	4.0639	3.18273	8.36472	8.13821	2.20588	2.16319	12.8929	12.1907	0.145307	0.121555	3.41005	4.39557
ENSBTAG00000013419	HTATIP2	0	0	1	0	1.60648	2.10224	2.34554	2.07932	2.11116	2.32542	3.24977	3.12192	1.99893	2.15598	1.33509	1.59727	3.96845	3.93731	1.16102	0.743584
ENSBTAG00000013421	PRMT3	0	0	0	1	2.25585	2.21564	2.19882	2.04285	2.31236	2.25608	2.2108	2.20244	1.93333	2.07061	2.31961	2.32654	2.6439	2.76245	2.43885	2.15793
ENSBTAG00000013422	GABRB3	0	0	0	1	5.26774	6.19861	3.76706	4.88316	12.3429	12.6107	1.57465	1.57505	4.17226	4.26303	4.65868	4.58604	12.3566	12.6521	5.67313	6.87235
ENSBTAG00000013499	LHX9	1	1	1	0	2.96248	0.245795	2.74637	1.27615	9.15834	8.97736	0.6869	0.545316	1.16763	1.66422	11.9696	11.4974	2.47782	3.49346	2.45916	2.45984
ENSBTAG00000013509	TTC16	1	0	0	0	8.28202	7.71477	1.43506	1.09707	4.49309	5.40699	3.2123	1.51291	0.23022	0.484221	3.27207	2.24788	6.00233	5.72044	7.39292	5.05065
ENSBTAG00000013527	PGD	0	0	0	1	4.18436	4.54386	5.90367	5.92827	4.00437	4.20153	3.29231	3.29346	2.72585	2.61388	4.85846	4.99832	4.19255	4.21148	4.15925	4.16327
ENSBTAG00000013532	FAM187A	1	0	0	0	7.86091	6.51032	2.10515	2.22878	12.7401	12.7896	0.330627	0.777493	2.01004	3.09028	4.88317	4.37009	5.31237	5.11088	7.01863	3.57098
ENSBTAG00000013538	PEX14	0	0	0	1	2.13111	2.30048	2.82572	2.89614	2.14736	2.31003	3.21906	3.12806	1.85764	1.83825	2.2435	2.14009	1.9302	1.93344	2.01404	2.05214
ENSBTAG00000013562	SKP2	0	0	0	1	2.24317	1.69198	1.05303	0.955675	1.46224	1.15405	0.547673	0.431327	0.317338	0.422931	2.58715	2.53552	1.93948	1.86594	2.64858	1.92742
ENSBTAG00000013563	TSG101	0	0	1	0	3.47332	4.71859	2.42689	2.48384	2.84499	3.02448	2.38138	2.38885	3.49324	3.53136	2.98676	3.0675	3.79837	3.86857	2.98972	3.35063
ENSBTAG00000013567	OR5D13	1	0	0	0	1.3297	4.55516	1.12374	0.739455	1.13494	3.83258	2.56374	1.4517	0.750757	1.00763	1.34801	1.69391	0.0626417	0.300365	3.92	5.93404
ENSBTAG00000013573	BIRC5	0	1	0	0	2.30578	1.23976	1.49763	1.54467	1.277	1.14173	1.05595	0.789795	1.48498	1.22534	5.13048	4.82183	0.560976	0.471275	3.27538	1.53025
ENSBTAG00000013578	CHI3L2	0	1	0	0	3.85928	3.4661	0.578534	1.95492	0.0758288	0.801286	8.30454	7.82627	0.532904	0.602371	11.0895	11.0279	6.94493	7.23032	1.05061	1.07868
ENSBTAG00000013596	NR1H4	1	0	1	0	2.74204	0.73805	0.137733	3.29311	1.14722	2.40847	12.9309	12.9764	2.1967	1.74471	9.31234	9.32892	4.9835	4.21185	3.98015	3.14518
ENSBTAG00000013598	RSPO2	1	0	0	0	0.053505	1.19587	2.22342	1.53264	6.88436	7.96118	9.35325	9.55455	12.3549	12.8169	7.27538	6.99766	0.891853	3.34403	1.75908	0.352715
ENSBTAG00000013614	TMEM38A	0	1	0	0	2.02747	2.04464	1.17386	1.32629	3.38537	3.51482	0.112275	0.0640621	7.41259	7.40564	1.2565	1.36023	2.45658	2.50761	2.18755	2.37964
ENSBTAG00000013632	GRM4	1	0	0	0	4.00848	4.53596	3.1348	2.18278	10.6316	10.4376	2.92533	3.13329	7.67494	7.7173	2.53857	0.97118	3.68305	3.76933	4.78575	2.1771
ENSBTAG00000013635	PDE6H	0	1	0	0	8.20868	8.37548	0.361879	0.174386	1.44284	0.387536	1.97831	0.943151	0.932264	0.744771	3.30102	2.20598	0.276255	0.0669063	3.0778	1.99897
ENSBTAG00000013644	OAT3	1	0	0	0	0.0253683	0.203445	0.23313	0.405203	9.3623	9.33584	1.36542	3.1564	0.803515	0.975587	1.50328	2.34075	7.04439	7.55778	1.39038	2.1279
ENSBTAG00000013653	NFE2L1	0	0	1	0	8.91882	9.12977	10.2414	10.186	9.36382	9.50945	8.98681	8.95838	10.9509	11.1005	9.84271	9.91655	9.1672	9.12814	8.63774	8.69235
ENSBTAG00000013665	KCNG2	1	0	0	0	0.130307	2.09581	6.52196	4.81584	8.91288	9.71523	0.620946	2.3441	10.9967	11.2888	2.13565	2.65587	8.42236	8.94705	1.8784	4.59644
ENSBTAG00000013667	TMEM30C	1	0	0	0	3.72129	0.392395	4.91385	3.80833	5.10953	5.68614	0.954674	0.748606	5.0159	4.21751	6.73279	6.43931	6.14917	6.55807	5.78036	5.70878
ENSBTAG00000013718	GC	1	1	0	0	8.88784	9.20782	7.01702	10.2107	5.7018	7.18684	19.8726	20.0165	9.44313	7.50282	6.8714	8.69213	7.88844	5.28215	9.5096	9.26558
ENSBTAG00000013720	KRT86	0	1	0	0	0.0984217	0.11754	0.305208	0.347326	6.65484	7.4151	0.674427	0.716546	0.875592	0.917711	0.0820325	0.124151	0.180888	0.233791	0.129323	0.171441
ENSBTAG00000013741	CPLX2	1	1	0	0	0.0732367	1.37225	3.18534	1.83096	15.0096	14.852	1.91591	3.0119	2.16885	2.9506	2.12966	4.53375	12.6521	12.801	3.9039	4.0768
ENSBTAG00000013760	COL4A6	0	1	0	0	5.51558	3.40684	1.01043	1.12152	1.01703	0.958942	2.25211	1.87998	1.67151	1.87601	4.69191	4.40128	3.17365	2.65653	7.40047	7.11405
ENSBTAG00000013764	OPTC	1	0	0	0	6.63707	3.82758	6.86631	5.88175	7.45609	6.67535	3.72319	1.64205	5.47411	4.74221	6.8554	5.72871	4.08151	4.21105	6.92108	6.06469
ENSBTAG00000013766	IRGC	1	0	0	0	2.72442	0.07325	4.49211	2.76913	3.90741	3.32527	2.42741	2.61511	3.32573	1.71194	5.44364	3.54198	3.87011	3.61651	4.58449	3.64492
ENSBTAG00000013768	NPSR1	0	0	0	1	1.99801	1.31411	2.4528	1.08366	4.61418	5.90993	2.49651	3.13426	0.0951937	0.757574	4.05532	5.33362	7.97815	6.97065	2.20017	3.09748
ENSBTAG00000013791	GPR41	0	1	0	0	3.99598	2.88224	10.8919	10.6638	5.27008	6.78189	5.33199	5.30231	1.12651	1.5626	3.02078	3.22832	5.20034	4.02256	2.48661	2.44659
ENSBTAG00000013819	PRHOXNB	1	1	0	0	3.27767	2.4006	2.07744	4.88862	1.82118	3.27967	14.9207	15.2494	5.11456	3.89664	0.805896	1.06448	1.2382	1.36593	1.4821	3.2052
ENSBTAG00000013841	MGC134427	1	0	0	0	3.09093	3.90787	2.45478	0.735063	5.66622	4.8749	2.06718	1.7108	3.30268	2.39788	4.75448	3.11681	3.22935	0.780517	4.64471	2.29459
ENSBTAG00000013873	MSX2	1	0	1	0	10.9946	9.96427	7.78639	7.60384	6.58962	6.7706	1.56497	0.713256	4.37302	5.39039	6.12518	6.01889	3.25171	3.35262	10.6742	7.84928
ENSBTAG00000013875	VAX1	1	0	1	0	0.182563	0.446538	1.41143	0.954553	5.923	9.02387	5.82415	6.68971	2.24606	2.45614	0.638583	1.8449	8.24453	7.04494	0.852612	2.41269
ENSBTAG00000013888	FOXA1	1	0	1	0	2.41722	3.2194	0.752294	1.98429	4.2916	6.80679	12.7604	12.7384	0.791914	0.897857	2.28154	1.6115	0.10513	0.215268	2.00522	0.779338
ENSBTAG00000013906	ZNF594	1	0	0	0	4.91995	6.80245	2.9365	2.18544	4.96576	5.65034	2.70762	4.03675	1.41113	0.239061	5.3719	5.59727	7.4868	7.87982	6.25928	6.88449
ENSBTAG00000013907	CRP	1	1	0	0	3.92614	4.59396	5.06276	7.4049	2.69458	2.42458	16.6502	16.6628	6.32435	4.63468	2.8302	5.08221	5.70981	4.91664	6.16214	6.09239
ENSBTAG00000013921	CKM	0	1	0	0	2.85945	5.06128	5.32332	4.12275	2.31363	3.88613	4.37453	4.31543	16.5355	16.4682	5.28109	4.08336	5.56103	5.79701	3.96499	3.82702
ENSBTAG00000013923	QPCT	0	0	0	1	5.48791	6.34711	7.29423	7.40346	5.8013	6.28878	0.502924	0.702091	4.21758	4.03284	2.50603	3.1998	6.6305	6.57352	4.6637	4.81136
ENSBTAG00000013928	WFDC2	1	0	0	0	12.2761	13.9428	4.34812	5.54319	1.96341	4.4501	11.7887	12.2902	2.20579	3.51986	4.85863	5.09724	9.29427	9.42552	10.9763	12.6163
ENSBTAG00000013973	SERPIND1	1	1	0	0	4.37987	4.52744	3.07933	6.05605	2.56495	3.1789	16.7933	17.0959	4.49789	3.75299	1.6588	4.01252	5.02675	4.74959	4.74916	4.667
ENSBTAG00000013974	TMEM215	0	1	0	0	0.0557633	1.01814	1.38838	1.03566	8.72162	9.39832	1.73871	3.06995	0.622111	1.17043	3.6877	3.29523	9.26711	9.38187	0.735241	1.56863
ENSBTAG00000013977	PRSS38	1	1	0	0	5.10001	4.34224	4.05082	3.39468	5.90525	4.59909	0.50782	0.229258	0.708985	0.430423	8.39594	8.10488	3.66067	2.9995	5.37131	2.30103
ENSBTAG00000013994	BSX	1	0	1	0	0.0798317	1.22152	0.836275	0.329236	4.92767	7.42758	0.183904	0.371186	0.385069	0.572351	1.02656	1.29352	0.17846	1.25673	1.03088	1.23472
ENSBTAG00000013997	Q95KW1	0	1	0	0	0.0974633	0.0667667	1.23534	0.58287	0.111685	0.089765	0.974005	1.58263	10.0683	9.64759	1.39972	1.39024	0.186838	0.1805	0.13169	0.10977
ENSBTAG00000014003	MYF6	0	1	1	0	4.46337	4.35854	7.90084	7.44548	5.718	6.32681	3.27218	4.15852	14.8711	14.8887	4.87765	4.57212	3.81144	3.32998	2.9404	2.80648
ENSBTAG00000014012	CLUL1	0	1	0	0	2.84228	1.72845	0.325784	1.05875	0.0709687	0.678937	0.621474	1.19845	0.586964	0.663944	6.49219	6.66169	0.1634	0.765598	0.83781	0.881911
ENSBTAG00000014016	IKZF1	0	0	1	0	2.02471	1.12924	2.26592	2.29739	1.52214	1.95396	3.33067	3.40179	0.802825	1.21507	2.02619	2.0056	0.549068	0.592635	1.41457	1.40128
ENSBTAG00000014050	CHRNB3	0	1	0	0	1.5977	1.30881	1.23476	0.181296	7.25674	7.86024	0.180242	0.860856	0.537582	1.54954	7.83384	7.66893	3.49208	4.55119	2.45483	3.1574
ENSBTAG00000014054	C9H6orf165	1	0	0	0	9.16171	8.58267	3.97635	3.72869	7.4982	7.81015	1.4411	0.0984425	0.416122	1.19643	5.67771	3.57958	10.2293	10.2446	8.70144	6.70844
ENSBTAG00000014056	CHRNA6	1	0	0	0	3.78735	3.08689	2.11381	2.26443	9.63452	10.0547	0.186817	0.126921	6.38276	6.39361	6.57712	6.42951	9.33195	9.84097	3.48858	1.59893
ENSBTAG00000014058	LDB2	0	0	1	0	3.09165	2.29604	2.69769	2.75514	2.22103	2.00893	2.29224	2.27	1.20096	1.102	2.35704	2.34022	1.36254	1.03622	3.22028	3.01541
ENSBTAG00000014059	ATP2B4	0	0	0	1	4.5973	4.11992	5.08799	5.32035	4.20548	4.54209	0.211206	0.260848	2.96327	3.14952	4.06092	4.08577	3.65477	3.62923	5.30795	5.55046
ENSBTAG00000014062	FRMD1	1	0	0	0	7.8754	7.64572	2.65476	2.45632	1.18445	2.5428	7.96774	7.47206	0.822258	0.935103	6.07653	5.68534	0.243623	2.78462	6.64141	6.27985
ENSBTAG00000014075	ITIH2	1	0	0	0	3.40843	2.89115	3.29969	5.23169	2.88928	2.93703	13.9622	14.0581	3.53998	2.44972	1.67038	3.22534	4.00486	3.90495	3.93966	3.82536
ENSBTAG00000014078	IGFBPL1	1	0	0	0	4.23385	2.74295	2.1986	3.48158	8.72447	8.99044	4.17801	3.80492	0.0926737	1.18665	5.79974	5.40001	5.01791	5.1553	4.2731	3.28804
ENSBTAG00000014102	WDR77	0	0	1	0	2.07111	1.99442	1.95239	1.5612	1.92583	2.04621	1.3578	1.31191	2.07163	1.96792	2.23191	2.07133	1.80918	1.75792	2.45859	2.02456
ENSBTAG00000014124	MLLT3	0	0	0	1	4.7479	4.95902	2.92285	3.24605	4.39425	4.48009	0.577596	0.614627	3.66921	3.86376	4.31926	4.35068	5.16664	5.10715	4.77979	4.91594
ENSBTAG00000014141	SPATA4	1	0	0	0	5.11862	2.60408	3.45877	3.26686	4.81552	5.26431	0.363854	0.0989775	1.73864	1.46088	4.07853	2.81471	6.69374	6.52295	5.51983	2.32558
ENSBTAG00000014143	ASB5	0	1	0	0	5.17459	5.14422	10.0035	10.0943	6.60622	6.61509	3.73038	3.74184	15.3226	15.0272	8.04285	8.0189	5.7542	5.94665	4.74237	4.87376
ENSBTAG00000014147	KLKBL4	0	1	0	0	6.91004	6.61873	0.02929	0.0554637	5.35467	5.99926	0.39851	0.424684	0.599675	0.625849	0.708581	0.121394	0.576393	1.83942	6.23758	5.90545
ENSBTAG00000014153	PKNOX1	0	0	1	0	2.58954	2.06825	2.33581	2.03203	1.8155	1.54974	1.2388	0.952888	2.263	2.17137	2.52142	2.19452	1.63373	1.43087	2.93877	2.6185
ENSBTAG00000014192	LRRTM2	0	1	0	0	0.0354467	0.027135	0.245389	0.247861	7.28737	7.59876	0.614609	0.617081	1.04009	1.51849	0.276854	0.819568	2.28252	0.746656	0.0694987	0.0719713
ENSBTAG00000014194	ADARB2	1	0	0	0	1.78394	0.161225	3.13862	3.69652	10.5545	10.8326	2.51607	4.02759	3.44617	3.96147	1.17043	3.23616	5.82276	6.18088	2.22446	1.7432
ENSBTAG00000014199	TBX21	0	0	1	0	6.1154	5.5463	7.05303	7.32612	2.29867	2.90266	7.55468	7.65819	4.81946	5.27032	6.61595	6.63836	4.2438	4.55618	5.972	6.04841
ENSBTAG00000014217	HHEX	0	0	1	0	1.91827	1.92392	2.88617	3.23402	1.70492	1.94537	5.24898	5.26235	1.33809	1.67794	2.32509	2.60001	0.944773	1.01222	1.47888	2.06403
ENSBTAG00000014218	DKK1	1	0	0	1	4.06738	6.51267	2.64624	2.19531	0.930786	1.23971	0.870876	1.33943	5.65773	5.20006	3.39168	3.55675	3.06201	3.05549	3.67239	7.21525
ENSBTAG00000014228	TFEC	0	0	1	0	8.21055	7.41903	9.24725	9.20266	7.92848	7.92003	10.5247	10.5363	5.71805	6.47753	8.59872	8.67753	7.94927	8.00321	7.83302	7.83659
ENSBTAG00000014239	CCNB1	0	1	0	0	8.1693	9.50062	3.7616	3.71793	1.3597	1.69988	2.0484	1.93236	1.02019	1.36627	6.45195	6.31692	1.618	2.00113	7.83269	7.59144
ENSBTAG00000014247	FAM83F	1	0	0	0	9.46136	10.3088	3.33902	4.64671	0.737726	1.79703	1.56293	3.35754	1.87522	3.93592	6.09342	6.71457	10.6488	11.0211	8.58826	7.87872
ENSBTAG00000014296	NCCRP1	1	0	0	0	1.07984	3.27214	0.325381	0.414641	3.98117	4.18384	0.999202	1.7347	0.895763	0.98502	0.102201	0.191461	0.182292	0.308766	1.26116	0.594876
ENSBTAG00000014319	DNM3	0	0	0	1	1.63333	1.40663	1.6199	1.74671	5.3638	5.61853	0.228247	0.320104	0.955771	0.847935	2.18028	2.09848	2.25942	2.34314	1.11083	1.12674
ENSBTAG00000014326	CDCA8	1	1	0	0	3.05934	0.809938	2.27217	2.29964	1.49327	1.19196	2.18958	1.75233	1.54895	1.3085	6.61109	6.27163	1.18624	1.00964	4.42266	2.18681
ENSBTAG00000014328	MGC138914	1	0	0	0	6.05375	8.27819	5.44968	5.89428	1.8616	2.29867	4.83714	5.29101	9.98259	9.73315	2.77519	3.51376	0.934963	2.62133	4.61028	6.23883
ENSBTAG00000014335	CYP17A1	0	1	0	0	1.90948	1.59735	4.44948	6.41258	1.81237	2.9347	1.884	2.46385	4.33493	4.29911	13.4021	14.0109	3.3449	3.8332	2.68513	2.87616
ENSBTAG00000014384	ZDHHC22	0	1	0	0	0.585473	2.65478	0.834074	0.371279	13.9033	14.4192	1.67793	1.89372	0.832154	1.60488	1.55031	2.75216	8.81222	8.87373	0.775423	0.232949
ENSBTAG00000014400	E2F2	1	0	1	0	5.82896	5.38311	5.28306	5.25939	7.66747	7.86295	4.69876	3.43038	1.9459	2.60161	8.45857	8.18126	2.1016	2.43382	5.73618	2.55477
ENSBTAG00000014409	YSK4	1	0	0	0	9.69728	9.47609	1.6299	0.625615	8.84497	9.11899	1.57088	1.08516	1.17367	0.761795	4.69578	2.01926	1.24744	0.96369	8.7081	6.30992
ENSBTAG00000014439	KMO	0	1	0	0	2.75307	2.84841	3.34708	4.43435	1.85484	1.86451	14.2903	14.7319	2.95535	1.55145	1.42423	1.76599	1.97966	1.03977	4.45088	4.1357
ENSBTAG00000014456	ERN2	1	1	0	0	11.6451	12.0626	3.71284	4.36601	2.74261	2.92988	5.06304	4.53209	2.78468	4.25506	4.15924	2.81498	0.124892	1.89603	10.4066	9.36827
ENSBTAG00000014466	VTCN1	0	1	0	0	1.42569	0.46466	0.341885	0.287527	0.14599	0.0916325	0.711105	0.656748	9.56196	9.74925	1.39653	1.36928	4.83562	3.30044	0.455105	1.01411
ENSBTAG00000014485	POF1B	1	1	0	0	8.62894	9.79791	2.09935	0.29578	0.70752	1.19935	1.25289	1.86869	1.14855	1.07994	2.54961	2.63813	8.9898	9.0477	6.68997	5.09036
ENSBTAG00000014486	ATP12A	1	0	0	0	4.10683	0.761432	7.34042	7.11712	5.9093	6.42022	2.82047	2.11758	2.48172	1.11088	5.25947	4.51266	6.4056	5.22325	5.20148	2.79231
ENSBTAG00000014517	KLB	0	1	0	0	3.44686	2.03782	12.8229	12.9313	3.67285	3.11301	11.6514	11.6396	6.55662	5.3875	3.9701	3.78704	4.46651	4.26529	3.90939	3.74245
ENSBTAG00000014533	KEL	1	0	0	0	4.90822	5.77169	1.0921	1.82511	0.553701	2.46653	12.9795	12.849	3.12953	1.92357	0.689236	0.684585	2.78712	1.27391	4.86332	3.34063
ENSBTAG00000014540	C16H1orf170	0	1	0	0	2.50574	2.11888	1.10698	1.43923	2.26954	2.5705	0.978098	1.0578	11.1369	11.163	0.782493	0.845251	1.65001	1.60193	2.25454	2.2683
ENSBTAG00000014547	PGAM2	0	1	0	0	2.36117	2.73977	2.73983	2.18542	3.34293	3.46637	1.54641	1.53954	12.6074	12.5595	2.7121	2.33529	2.79721	2.71122	2.57672	2.69142
ENSBTAG00000014556	AGRP	1	0	0	0	1.81613	1.88632	1.81907	2.97136	6.50834	7.41832	0.13237	0.179918	1.90017	1.94357	1.56748	2.45737	2.70735	3.68568	3.70785	0.954841
ENSBTAG00000014575	COL4A5	0	1	0	0	5.81125	5.02409	0.491818	0.757648	1.85576	2.03527	2.48719	2.20951	1.27679	1.57176	4.48712	4.42008	3.10951	2.81445	7.17584	7.22359
ENSBTAG00000014581	MLIP	0	1	0	0	4.39255	4.99437	5.54573	5.78717	4.64186	4.76563	7.74939	7.82409	13.6073	13.5161	4.32169	3.53128	1.96403	2.505	4.66812	4.8917
ENSBTAG00000014584	SLC22A10	0	1	0	0	0.422293	1.34968	0.587871	1.40279	4.31542	4.53769	8.66875	8.44276	0.819186	0.914745	0.261301	0.856861	0.145342	0.216595	0.0729163	0.168475
ENSBTAG00000014605	ETV6	0	0	1	0	2.61644	2.53336	2.17424	2.26077	0.717969	0.921851	1.83057	1.80792	0.931642	1.37938	2.55631	2.53054	1.29443	1.30078	2.64725	2.81841
ENSBTAG00000014606	FOXR1	0	1	0	0	3.16883	2.26227	1.9005	2.6967	0.337285	1.0943	0.57513	0.637825	1.10356	1.86058	8.00305	7.68734	0.109142	0.140925	1.4167	1.59195
ENSBTAG00000014638	TRPC7	1	1	0	0	0.81882	0.188162	1.48147	0.575249	8.30485	8.68774	0.567965	1.14428	1.28678	0.90054	1.05372	3.91742	8.85679	8.7336	0.088075	0.802751
ENSBTAG00000014652	TRPM8	1	0	0	0	6.38618	7.79928	1.82247	3.80696	6.69438	7.3384	10.0314	10.6118	0.479719	0.782816	2.23161	3.23169	8.50369	9.34516	5.63153	6.22114
ENSBTAG00000014657	C14orf39	1	1	0	0	0.00922167	0.363255	2.22519	2.08953	0.869792	2.88431	0.872472	1.69375	2.5903	4.29878	3.37127	5.83024	11.0476	11.5269	1.17624	0.707276
ENSBTAG00000014666	GP9	1	1	0	0	3.28735	1.26248	8.60047	8.93789	6.6502	6.5235	2.17031	2.29038	1.60991	3.3233	0.0917038	0.2677	1.12816	2.98278	2.76408	4.7704
ENSBTAG00000014674	CHRM2	0	1	0	0	10.8351	9.49135	2.63941	3.90138	9.66999	9.77627	5.09063	5.31238	0.671	1.48595	8.327	7.81797	5.51985	6.29436	11.9055	12.0017
ENSBTAG00000014678	PAEP	0	1	0	0	0.052215	0.0564417	0.576085	1.25639	0.416135	1.1727	0.6361	0.660419	2.3117	1.33392	0.04371	0.0680287	0.153895	0.168539	0.090995	0.115314
ENSBTAG00000014682	AANAT	0	1	0	0	1.74429	2.01085	3.09002	2.94916	3.26652	3.94396	0.21242	0.339911	2.30553	3.37934	6.66885	7.80341	1.64938	1.65987	1.16286	1.26416
ENSBTAG00000014704	HELT	1	1	1	0	4.01759	2.50848	0.61439	0.288515	1.6154	0.47605	3.82646	2.4852	1.18477	0.8589	0.391215	0.06534	0.529002	0.19273	6.16883	2.90252
ENSBTAG00000014721	MUC4	1	0	0	0	9.89895	6.30785	1.43395	2.7359	3.74231	3.78579	1.96579	0.77865	5.4572	6.3237	5.96824	5.00753	4.11404	2.99549	8.20963	3.19826
ENSBTAG00000014735	HOXA13	1	0	1	0	6.88183	6.9939	6.49462	2.24266	0.374605	0.148968	0.939715	0.714078	5.38735	5.12936	0.347325	0.121688	1.81079	0.627643	2.15725	2.54596
ENSBTAG00000014738	HOXA11	1	1	1	0	13.3618	13.4251	7.33917	5.22513	0.824984	2.46543	2.67866	4.22054	3.65454	3.94055	2.90507	1.75948	1.74384	4.3194	12.9793	13.6606
ENSBTAG00000014741	OTX2	1	0	1	0	1.55868	1.27135	3.69594	3.4598	11.2487	10.8731	0.19675	0.138321	0.96717	2.11646	1.09705	1.48245	6.7824	6.62791	2.59085	0.534791
ENSBTAG00000014746	CATSPER3	1	0	0	0	5.1155	4.58949	3.45756	1.84838	5.48223	5.67776	3.48528	3.71147	5.76551	5.66573	4.49804	4.15591	5.80918	5.83249	5.2776	4.85979
ENSBTAG00000014760	FOXE1	0	0	1	0	2.19661	0.787578	1.82893	2.53193	0.451526	1.17587	0.703081	0.762188	0.904245	0.963354	0.110686	0.169793	3.1321	4.92446	1.32724	0.591657
ENSBTAG00000014761	PGA5	1	0	0	0	7.2357	7.56607	6.21413	6.46732	3.06765	3.42031	7.76393	7.55616	1.37555	0.197059	6.8486	7.56907	0.934345	1.74621	5.96544	5.77252
ENSBTAG00000014813	TCF23	0	1	1	0	10.4481	9.23908	8.16638	7.69406	3.19598	2.52049	3.96439	3.96124	3.55396	3.66525	11.3911	10.975	3.00754	3.22002	12.0643	12.7127
ENSBTAG00000014819	CRYBA2	0	1	0	0	0.482418	1.7183	0.23179	0.390531	0.035895	0.194636	0.95318	1.85908	0.802175	0.960916	0.37331	1.30578	7.23502	7.89795	0.0559	0.214641
ENSBTAG00000014830	PPP1R32	1	1	0	0	12.1506	11.6389	2.21449	1.08887	9.91493	10.4004	0.353779	0.683884	1.10367	0.267411	5.80041	2.88795	9.41935	9.09302	10.8715	8.71793
ENSBTAG00000014834	ZP3	0	1	0	0	4.51877	4.3103	4.13627	2.82275	6.308	6.46629	2.82943	3.9032	0.764266	0.0829213	9.36663	8.73433	2.9529	1.91011	2.15234	2.77056
ENSBTAG00000014847	BBOX1	1	0	0	0	3.84452	3.31613	3.56728	5.77152	10.5754	10.8392	13.991	14.1437	4.17699	3.19228	6.27092	7.96945	3.1332	2.71358	4.32073	4.34836
ENSBTAG00000014848	NR0B2	1	0	1	0	2.59577	4.81649	1.50742	2.22442	0.0634062	0.910521	12.0448	12.9662	3.91719	4.96243	7.19785	7.21184	3.51462	2.97589	1.96589	0.59738
ENSBTAG00000014859	CAPS2	1	0	0	0	9.45947	8.78284	6.41174	5.90577	8.74426	8.29661	3.14186	0.136451	5.19031	5.2854	7.0403	5.10137	10.3268	9.9517	8.86901	7.81495
ENSBTAG00000014882	DNMT3L	1	1	0	0	1.2294	0.409143	7.15955	7.17244	0.757383	2.37191	0.571962	0.59418	1.96113	1.17592	1.97613	3.7062	2.49358	0.799605	0.0268575	0.049075
ENSBTAG00000014885	MYOM3	1	0	0	0	4.41243	1.88075	3.83123	3.80191	4.0335	4.95733	2.82497	3.33299	11.0861	11.0074	5.14397	4.86779	1.23263	0.989396	3.84893	2.85615
ENSBTAG00000014890	CYP19A1	0	1	0	0	2.06059	1.56316	1.40363	1.74699	5.26586	6.238	1.3462	1.77018	4.02018	5.31588	11.5358	12.0221	0.97679	1.5939	2.15319	2.96582
ENSBTAG00000014908	CCL27	1	0	0	0	7.2681	6.13064	4.27114	1.14774	7.90392	6.87236	2.25078	1.74441	2.26765	1.97823	6.53577	6.91202	8.33615	7.80682	6.73315	5.15165
ENSBTAG00000014911	LEP	1	1	0	0	4.27449	1.52043	13.9205	13.5859	2.55622	0.667092	2.79009	2.73516	8.04073	6.8439	3.80644	3.98182	4.16231	3.29928	2.62431	1.91561
ENSBTAG00000014920	SEMA3E	1	0	0	0	2.71806	7.12427	3.1547	2.96088	8.14561	8.95447	4.22443	4.62052	2.156	2.70778	4.17066	5.04486	8.87911	9.00243	4.20967	6.96432
ENSBTAG00000014930	MYLK2	1	1	0	0	4.82124	5.85426	5.71237	4.80839	3.16915	5.14183	3.89361	3.88388	16.3512	16.6696	5.6398	5.3215	5.44698	5.99785	5.05696	5.15839
ENSBTAG00000014956	JSRP1	0	1	0	0	3.565	3.55486	4.24585	2.78819	2.62119	3.60841	3.71778	3.05942	15.1609	14.9952	10.1924	10.2519	5.59255	4.95238	3.92374	2.4545
ENSBTAG00000014967	PAX7	0	1	1	0	0.0548183	0.151052	0.535466	1.24026	3.2567	4.20718	0.621441	0.72532	9.4864	9.66266	0.601496	1.91987	9.32652	8.3538	0.0763362	0.180215
ENSBTAG00000014969	CILP2	1	0	0	0	4.28226	3.71115	7.05822	6.94609	5.73101	5.28079	1.81841	1.19396	5.25676	5.85117	4.17099	4.14552	0.841528	2.52846	4.82531	4.61512
ENSBTAG00000014977	ALX1	1	0	0	0	8.26702	8.08624	9.72103	8.94916	4.44494	3.95019	0.858571	0.0289487	1.19344	0.272944	7.37254	6.38407	4.44817	3.37207	7.53402	6.98024
ENSBTAG00000015008	CPA3	1	0	0	0	7.32685	6.7963	9.85705	10.0246	1.63699	3.58998	4.91547	4.62042	7.98308	8.1918	8.36648	8.24986	3.94296	2.8925	7.70175	8.09406
ENSBTAG00000015018	FSD2	0	1	0	0	0.783709	1.15918	1.22153	1.66231	1.2509	1.50998	1.64887	1.98338	6.09047	6.15665	0.165953	0.364392	1.41895	1.63736	0.520485	0.637382
ENSBTAG00000015054	CRYGD	1	1	0	0	0.039395	0.230482	0.260337	0.452686	2.79516	5.60222	0.629557	0.821906	0.830723	1.02307	0.385188	1.3159	0.13614	0.320651	0.0844525	0.276801
ENSBTAG00000015056	RBP2	1	1	0	0	1.59777	0.3808	0.232181	0.135989	2.4491	0.713039	9.36219	9.27059	2.22316	2.09766	2.64567	1.87669	0.505832	1.15974	1.96475	2.6421
ENSBTAG00000015059	MMP13	1	1	0	0	2.64674	0.638705	0.36657	0.0585712	1.37351	1.04143	3.4647	3.57529	1.78021	0.89909	6.91457	5.73506	5.2727	1.40163	3.67984	3.32669
ENSBTAG00000015062	KCNK18	0	1	0	0	1.62087	0.522082	0.439771	0.307359	0.243881	0.111469	0.808991	0.676579	1.01016	0.877744	7.3757	6.2475	0.311397	0.218174	2.64182	1.90484
ENSBTAG00000015065	TMPRSS7	1	0	0	0	0.0480267	0.24337	1.02811	2.74218	3.01719	3.59903	6.27396	6.36862	1.40867	2.72003	0.0637812	0.205444	0.174532	0.299954	1.03882	0.549939
ENSBTAG00000015067	NHLH2	0	1	1	0	0.412363	1.45884	1.36979	1.59514	9.83671	10.3757	0.852454	1.61856	1.07321	1.88089	0.303479	1.1617	0.07092	0.257564	0.0271988	0.198944
ENSBTAG00000015095	TTC6	1	0	0	0	7.93998	7.63418	0.347791	1.24399	6.19629	5.98851	5.46534	4.36213	0.378041	0.128311	2.59433	0.92734	3.09885	2.16471	5.71352	2.69161
ENSBTAG00000015118	PNPLA1	1	0	0	0	0.982307	5.94521	5.74156	6.24509	5.25113	5.77261	0.832327	1.44213	3.7124	4.36258	6.97844	7.23255	6.1111	6.4516	0.513171	2.52377
ENSBTAG00000015125	KLK5	1	0	0	0	6.06413	7.73816	4.15088	3.84249	7.39588	7.81384	0.766118	0.281451	0.317825	1.07634	2.83872	2.54486	0.88679	0.783332	0.39961	2.91491
ENSBTAG00000015128	KLK8	1	0	0	0	2.15529	0.518395	5.25124	2.66927	3.52987	2.14152	0.797883	0.522679	5.06439	3.3921	4.44807	2.26429	0.324853	0.0705638	2.94148	5.50886
ENSBTAG00000015150	IL12A	1	0	0	0	9.50534	9.0932	3.76625	3.09129	7.18451	7.05695	1.78043	0.109539	5.68779	3.55535	9.04995	8.78166	6.03782	6.0018	7.30075	7.07497
ENSBTAG00000015176	C6orf201	1	0	0	0	3.94	5.76087	0.153323	1.77364	5.89014	5.32208	2.00848	3.40443	1.69631	1.72865	2.5664	3.17659	4.09515	1.74614	2.26435	2.34491
ENSBTAG00000015188	KLF6	0	0	1	0	4.69471	4.46548	6.64852	6.29732	2.71722	2.53208	4.44459	4.06798	5.27086	4.9199	5.07843	4.72616	3.0049	2.69633	4.79809	4.97627
ENSBTAG00000015194	CBLN1	1	0	0	0	0.0777633	2.14255	3.1318	0.655014	12.9109	13.6668	0.421362	1.9235	0.329892	1.21117	2.84138	2.29596	11.0085	11.0901	2.24118	2.30845
ENSBTAG00000015197	KLHDC8A	1	0	0	0	6.7497	6.16164	3.46523	0.978676	11.1439	11.2154	1.87278	1.64415	1.65737	1.10482	4.60004	3.93501	10.4607	10.704	6.23269	4.91084
ENSBTAG00000015200	L2HGDH	0	1	0	0	0.779073	0.616325	0.507537	0.700565	0.950708	0.804225	1.91234	1.85781	2.92635	2.88974	0.456704	0.735651	2.07051	2.12059	1.0233	1.01053
ENSBTAG00000015204	SMPX	1	1	0	0	10.6821	8.27776	5.58174	3.88835	7.4816	7.39613	5.28871	3.73719	16.741	16.2406	5.79587	4.64051	8.32654	8.30661	11.1104	8.59847
ENSBTAG00000015217	DLX1	1	1	1	0	0.410627	1.65056	0.158057	0.378683	9.05244	11.2524	0.527277	0.747902	0.978722	1.73034	1.11051	1.4948	0.384498	1.15335	1.19764	1.29327
ENSBTAG00000015238	DSC3	0	0	0	1	5.19488	7.29749	3.83887	4.12974	5.4824	5.68098	1.83384	2.66769	1.60919	1.17879	3.77883	5.19555	10.7169	10.0853	6.68883	7.89242
ENSBTAG00000015246	TAS1R2	1	0	0	0	0.0563967	0.18389	3.55831	4.06757	5.89386	6.58374	6.92981	7.24026	1.5557	1.199	1.88737	3.91793	3.62849	2.67533	2.4691	3.53318
ENSBTAG00000015274	PRL	1	1	0	0	10.0715	11.9029	14.886	12.8507	8.23785	9.33027	9.75782	11.0747	15.8191	15.0066	15.2509	15.2239	25.4451	25.7479	11.2516	12.5354
ENSBTAG00000015280	KIF2C	0	0	0	1	4.52393	2.76895	1.94546	2.26709	1.89137	1.79426	1.81503	1.80561	1.41838	1.39274	6.91231	6.56585	1.60986	1.45112	5.03102	2.65376
ENSBTAG00000015288	BEST4	1	0	0	0	4.41189	4.10174	3.93023	4.30233	5.06628	5.12229	4.88345	5.00411	3.83031	3.30732	1.83386	3.41702	5.23486	4.90078	4.78641	4.82732
ENSBTAG00000015293	NXPH3	1	0	0	0	9.97327	11.4646	6.9631	7.44582	8.70991	9.26882	1.06946	2.96386	6.49084	6.83757	8.93839	9.02687	5.9368	5.72011	9.31843	9.76878
ENSBTAG00000015298	TNFRSF13B	1	0	0	0	6.85016	5.05849	1.45863	3.04028	0.794414	1.01643	0.85438	2.96958	1.07354	3.22692	1.77858	1.10693	1.20979	1.17905	6.2154	4.57072
ENSBTAG00000015340	ANGPTL7	1	0	0	0	0.403002	3.60143	1.65545	1.78259	9.49614	10.0018	2.25827	0.653219	5.89874	7.47864	2.88577	3.67461	8.60809	8.23873	0.595315	1.9661
ENSBTAG00000015350	PLIN	0	1	0	0	2.0492	1.59061	10.6683	10.5099	1.43839	1.21052	1.06631	0.843211	4.27904	3.18792	1.75736	1.50774	1.82384	1.74371	1.60534	1.36023
ENSBTAG00000015356	TAC1	1	0	0	0	4.22594	0.89712	3.30068	2.67842	13.8838	13.2466	4.39958	4.52572	1.37741	1.3127	3.17002	4.32811	9.84935	9.69357	0.111381	1.51996
ENSBTAG00000015362	BMP7	0	0	0	1	9.10449	7.78967	11.1828	10.407	10.7406	10.751	1.71956	2.55949	8.25964	7.49016	6.99709	6.42484	8.08294	7.87463	10.0585	10.0972
ENSBTAG00000015405	DCHS1	0	0	0	1	3.10443	2.33897	3.06146	2.88874	2.82628	3.02981	0.497569	0.448001	1.72341	1.70895	3.84628	3.51256	0.622789	0.552643	3.59011	3.5683
ENSBTAG00000015406	ZNF750	0	1	0	0	5.59437	7.41463	0.0547138	0.0592013	0.577364	0.0934912	0.641954	1.109	8.92406	8.6009	2.43273	2.26685	4.66031	4.00249	2.21566	1.95869
ENSBTAG00000015409	STK32B	1	0	0	0	4.42138	0.640765	5.82565	3.73349	9.77578	10.0328	4.69928	5.08514	0.290056	1.23565	8.24109	8.09331	9.75186	9.64391	4.53032	5.40842
ENSBTAG00000015441	ACTB	0	1	0	0	7.15523	4.38391	2.78586	2.70073	1.65439	1.15812	1.34918	0.915532	2.49416	2.83683	6.74355	6.2358	1.74676	2.27552	9.29925	9.18272
ENSBTAG00000015460	TP63	1	1	0	1	2.12134	0.527802	2.27272	4.61253	5.03388	4.40371	3.9879	4.19217	11.6484	11.6893	2.42924	1.99128	4.67217	3.7927	0.673599	0.102884
ENSBTAG00000015462	BNC1	1	0	1	0	4.32219	1.34135	4.1227	4.70847	4.6768	5.35879	2.06541	1.03043	4.05183	3.92324	9.28657	8.59333	0.202303	0.11293	6.40213	7.16306
ENSBTAG00000015470	SYPL2	0	1	0	0	2.18487	1.28694	3.38393	3.13861	3.82781	3.54333	2.4401	2.43016	12.0052	11.8928	1.57015	1.19422	2.04252	2.34369	2.99883	2.16242
ENSBTAG00000015475	MORC1	1	0	0	0	5.32952	4.41327	2.45881	3.33615	0.347866	0.856194	7.2417	6.7772	1.52249	0.935625	0.487541	1.35008	0.139053	0.046215	4.68857	1.44268
ENSBTAG00000015485	MGC134132	1	0	0	0	10.4799	10.5351	2.13018	1.60952	9.55922	9.71152	1.54436	0.166912	0.311801	0.644787	4.18054	2.43116	10.492	10.0142	9.3443	7.19473
ENSBTAG00000015517	OR5AP2	1	1	0	0	8.55695	9.53505	2.71718	4.52118	0.586364	3.54892	0.867805	0.399145	0.0589138	0.276735	7.03196	7.42029	5.07203	5.35305	8.53693	8.18114
ENSBTAG00000015525	SLC39A12	1	0	0	0	2.48899	2.60291	5.1672	4.76657	11.2596	10.3491	3.88907	3.20234	1.76562	2.39558	1.43289	3.40321	7.93103	7.30111	5.33278	3.9403
ENSBTAG00000015565	DSB	1	0	0	0	6.64518	7.20339	4.33799	5.44464	1.86593	2.91846	2.13223	2.49103	0.130746	2.27509	4.85255	3.63729	2.66917	2.92896	3.30676	3.52638
ENSBTAG00000015574	RBP7	1	1	0	0	3.50262	2.13006	13.1574	12.9946	1.10666	0.993584	0.374499	1.05507	7.92167	7.95157	5.14846	2.30027	2.79296	4.16211	2.9239	2.65596
ENSBTAG00000015578	SAP30	0	0	1	0	1.70045	1.33056	1.12383	1.03179	1.18178	0.869609	1.65803	1.56683	0.898575	0.8145	2.24669	2.04718	1.30278	1.30219	1.98141	1.80721
ENSBTAG00000015581	COL9A3	1	0	0	0	9.083	9.64227	4.95005	4.70864	8.10151	8.05943	0.646079	2.68563	2.84247	2.66075	9.753	9.07525	6.37769	6.59631	9.52252	11.0342
ENSBTAG00000015584	BMI1	0	0	1	0	5.29189	5.32234	5.40669	5.37824	5.30815	5.4102	4.78205	4.72921	5.97357	6.06745	5.21469	5.23489	6.13474	6.14279	5.55861	5.60411
ENSBTAG00000015637	IMPAD1	0	0	0	1	3.82892	3.96646	4.06979	4.02894	4.45368	4.5824	4.0897	3.99234	3.90236	4.01878	4.48407	4.60322	4.23618	4.27443	4.12387	4.05345
ENSBTAG00000015650	TNN	1	1	0	0	1.70134	2.1264	1.26897	2.38433	5.4551	5.4821	1.17121	0.785887	1.09062	2.48056	7.75677	10.3677	1.39967	2.93953	2.70273	5.01817
ENSBTAG00000015654	PON1	1	0	0	0	4.28826	5.54488	4.19741	7.7707	2.1239	2.79646	17.2295	17.5023	8.01379	8.20661	3.39749	6.19075	7.36738	7.45457	6.79092	6.71696
ENSBTAG00000015676	AMBP	1	1	0	0	8.58555	7.04015	7.2351	10.6282	4.3344	5.70109	20.2986	20.499	10.203	9.3251	6.36345	8.97842	8.97501	7.64885	10.0291	9.98983
ENSBTAG00000015681	RGR	1	0	0	0	5.53963	8.81955	1.69181	2.99147	11.0064	11.5279	1.49719	2.409	1.54144	2.99584	4.29246	3.50346	1.41518	4.34548	3.18672	6.48865
ENSBTAG00000015685	KIF12	1	0	0	0	11.6438	8.27695	2.08562	1.62391	7.79953	7.37547	8.43208	8.15573	2.12691	1.63908	6.83699	6.43831	8.19309	7.80453	11.015	7.45528
ENSBTAG00000015690	PLIN4	0	1	0	0	5.30359	3.21635	11.745	11.6556	1.43235	1.10043	3.19584	3.17973	9.17079	8.89705	3.57943	3.27089	3.21688	3.00162	6.6752	6.42435
ENSBTAG00000015715	SPOCD1	1	0	0	0	2.84435	3.5399	4.53226	5.73726	4.02131	5.09516	2.73911	4.57114	0.481785	1.97158	6.14142	6.92373	5.81905	6.6656	1.75659	2.73785
ENSBTAG00000015724	BPIFB1	1	1	0	0	9.40493	12.8067	1.84123	1.65697	3.37355	4.34573	1.70798	2.18365	3.4548	4.40814	2.44511	1.60747	4.63708	3.73573	7.59689	10.7812
ENSBTAG00000015763	SPATA22	1	0	0	0	3.01596	2.77919	6.06883	5.917	1.52672	1.04768	6.0637	5.61204	0.966603	0.410212	3.38374	5.55025	3.18136	2.56724	2.37101	3.68325
ENSBTAG00000015784	HAPLN2	1	1	0	0	3.66521	1.07394	5.38243	5.30692	14.5109	14.3745	1.68173	1.56062	6.032	5.44595	2.70193	2.56646	1.75215	3.13779	2.78464	1.55688
ENSBTAG00000015786	LRRC39	0	1	0	0	5.22852	5.71739	5.34517	5.13613	2.65168	3.10339	4.98858	5.07834	14.9928	15.0434	5.5406	5.20852	5.11507	5.1785	4.7696	4.70615
ENSBTAG00000015789	BCAN	0	1	0	0	5.25936	5.559	1.35345	1.51304	14.8197	14.8695	2.18797	1.79309	1.56577	3.14108	4.25848	3.30907	5.59268	5.80498	4.47785	4.07434
ENSBTAG00000015811	DPPA4	1	0	0	1	7.44971	6.36327	5.84717	5.64027	5.80578	3.53651	1.00775	0.118604	2.53904	1.78017	6.58144	6.49641	6.27891	6.19967	7.63248	7.60775
ENSBTAG00000015830	SLC5A5	1	0	0	0	1.86672	0.299798	7.14707	7.11528	7.17548	6.89837	0.0732663	0.140544	1.44459	1.73155	0.391236	2.38991	5.65534	6.19187	5.58224	5.86251
ENSBTAG00000015835	PIWIL2	1	0	0	0	2.39079	2.19641	2.94801	1.14805	2.7512	2.88737	5.0691	4.91909	2.54381	2.41394	5.86304	5.35097	3.74535	1.7235	3.1883	0.986849
ENSBTAG00000015836	EXOC3L2	1	0	0	0	6.12659	5.75915	7.47614	7.43273	4.44825	4.77823	10.6933	10.7145	4.64809	2.3355	8.64245	9.12958	8.94574	8.64527	6.3787	6.28761
ENSBTAG00000015843	SLC6A3	1	0	0	0	3.16802	2.85087	7.79373	7.98747	7.06634	8.1712	2.98707	1.184	1.74976	1.63766	5.52913	4.85581	0.729087	2.5084	0.0744288	0.786846
ENSBTAG00000015848	PHKA1	0	1	0	0	1.86698	1.96819	1.48727	1.52201	2.05194	2.1592	0.640025	0.587508	7.58091	7.62323	2.10956	2.19788	2.73417	2.77066	2.00121	2.03909
ENSBTAG00000015872	PROKR2	1	0	0	0	6.89972	6.3512	5.17993	5.23655	5.70188	5.90684	1.53435	2.56467	3.89799	3.47968	2.53043	0.79783	1.03144	1.65286	5.5728	5.08691
ENSBTAG00000015875	FOXM1	0	0	1	0	6.02042	4.2514	4.56899	4.65046	2.08959	2.92252	6.04565	5.39031	4.01503	2.68185	9.35564	8.81611	3.424	3.30678	6.87943	4.85864
ENSBTAG00000015892	NDUFB4	0	0	0	1	9.91719	9.96466	10.2665	10.3036	10.4004	10.4424	10.1463	10.2428	11.8835	11.8311	10.2117	10.196	10.4348	10.4272	10.2248	10.1617
ENSBTAG00000015894	WWOX	0	0	0	1	1.72938	0.971602	1.90802	1.79196	2.77525	2.99726	1.05317	1.34007	0.364169	0.374298	2.39061	2.19667	1.7103	1.58209	2.6121	2.18975
ENSBTAG00000015895	HGD	0	0	0	1	5.43124	5.30474	6.37575	7.84532	5.43818	5.3158	16.7118	16.8112	6.69091	5.02437	5.75849	6.34548	5.16085	4.11684	6.28642	6.43193
ENSBTAG00000015898	RABL3	0	0	0	1	2.96547	3.34277	3.01034	3.03698	3.19757	3.26425	2.7473	2.85763	3.68794	3.74028	2.80508	2.90122	3.50416	3.60921	3.1307	3.26855
ENSBTAG00000015902	FP	1	1	0	0	8.73609	4.07571	3.53105	4.06128	6.62759	6.78454	2.06422	2.09905	4.53106	4.46885	10.6123	11.9325	5.85988	5.75583	11.2689	10.4164
ENSBTAG00000015912	DMKN	1	0	0	0	7.08951	7.48291	5.28047	3.73545	1.28231	1.15627	0.51991	0.337637	0.98382	1.35898	5.3332	3.13854	1.17783	0.193518	3.612	3.14717
ENSBTAG00000015935	IYD	1	0	0	0	5.09795	6.92542	6.32191	7.27904	0.715764	0.947189	14.1663	14.5911	12.57	12.5802	5.10505	5.5993	2.25377	4.49464	4.55434	5.11291
ENSBTAG00000015940	SCGB2A2	0	1	0	0	4.76212	7.5708	0.351021	0.555163	0.155126	0.359268	0.720241	0.924383	0.921406	1.12555	0.127846	0.331987	2.17054	2.05296	2.64221	4.76966
ENSBTAG00000015953	IL13	1	0	0	0	2.12883	3.93197	4.17087	4.69943	5.91788	5.26494	2.58621	2.73726	3.09962	2.99291	0.128277	2.93004	1.63671	2.195	5.69385	5.12468
ENSBTAG00000015979	SEZ6	0	1	0	0	2.04149	1.86645	1.46849	0.875309	8.44167	8.50996	0.437584	0.514616	1.00113	0.779441	1.39149	2.02378	8.9138	9.06039	2.25535	2.2536
ENSBTAG00000015981	ETV1	0	1	1	0	1.58163	1.64674	1.77271	2.01793	4.02483	4.06262	1.42395	1.33474	0.589754	0.623961	1.56016	2.11586	6.42559	6.58703	1.34854	1.70215
ENSBTAG00000015988	MYH11	0	1	0	0	6.56073	3.87288	3.12373	3.40311	1.56389	1.47207	3.35997	3.2769	2.94909	3.49661	6.5325	6.08562	1.50896	2.32853	8.29472	8.2918
ENSBTAG00000016030	HOXD10	0	1	1	0	12.6098	11.6931	7.08841	6.34818	0.764412	2.1775	3.15441	3.29949	3.6511	3.41447	7.72693	7.67492	1.25299	2.66154	13.4094	13.2844
ENSBTAG00000016033	HOXD9	1	0	1	0	12.0417	11.1158	10.357	10.2655	1.4972	2.48822	4.23634	4.37726	12.2782	12.212	11.9359	11.5309	3.68052	1.75045	12.8689	12.4335
ENSBTAG00000016121	KRT75	0	1	0	0	8.32621	6.42893	1.64628	2.07352	0.109232	0.0836075	0.674343	0.648717	2.67888	2.10221	1.0673	0.371982	1.87565	2.26788	9.55154	10.8062
ENSBTAG00000016125	KCNA7	0	1	0	0	1.74465	2.60322	2.42816	0.87561	0.0964513	0.788929	2.27086	3.39903	13.6333	13.7072	1.03302	1.14932	0.516758	1.79485	0.967451	1.07289
ENSBTAG00000016138	CGA	1	1	0	0	4.81311	7.19043	9.36373	7.5141	8.52338	10.2418	5.69188	7.03506	10.2855	8.83062	9.98987	11.1228	20.6119	20.1638	5.60212	7.80551
ENSBTAG00000016144	LCN10	0	1	0	0	1.75715	2.1704	2.92246	3.13968	1.2044	1.40131	0.174874	0.245655	2.64185	1.17267	8.14374	8.05687	2.65274	4.31156	1.8675	2.92763
ENSBTAG00000016149	C9	1	1	0	0	3.73834	3.57327	4.73023	7.57814	3.04489	3.29194	17.015	17.0959	6.78255	5.97986	5.28559	6.46239	5.3447	3.20687	6.69017	6.6208
ENSBTAG00000016151	VTN	1	1	0	0	4.64414	4.75614	5.57106	8.99528	2.82796	3.08234	18.6701	18.8182	8.04836	6.10186	4.04121	7.04131	6.50315	4.05203	8.35531	8.3049
ENSBTAG00000016159	NPBWR1	1	0	0	0	1.67656	0.284138	1.97447	1.42523	7.8236	8.22934	0.571975	0.331313	1.74523	0.843888	4.47041	1.17756	3.99777	4.4797	0.984983	0.0931375
ENSBTAG00000016179	CIB3	1	0	0	0	4.74946	5.64873	0.577724	2.14786	3.68543	5.74628	0.258289	0.367395	0.459454	0.56856	3.0911	3.86143	4.61613	5.99699	5.25347	1.59713
ENSBTAG00000016183	MARCH4	0	1	0	0	5.45263	3.98095	3.69178	2.53095	10.1946	10.0028	1.79793	2.34619	0.327352	0.899555	3.67847	2.71151	12.7911	12.8294	5.50568	4.32765
ENSBTAG00000016202	TREH	1	0	0	0	4.79785	5.68042	4.33637	4.31272	5.75845	5.70891	14.0652	14.0292	3.322	1.16095	5.33368	4.61928	2.44641	2.56929	4.522	4.04322
ENSBTAG00000016209	SLURP1	1	0	0	0	5.48239	5.0586	0.201679	0.210174	5.95383	5.87919	1.72	0.947507	0.772059	0.780554	0.302074	0.99705	3.28557	5.6151	5.331	4.0186
ENSBTAG00000016210	LYPD2	0	1	0	0	7.11882	6.64135	1.11258	0.300495	3.18162	2.91993	1.53662	0.687275	0.592191	0.52145	0.958013	0.0993	0.78853	2.2719	5.37341	5.40651
ENSBTAG00000016223	SCRN1	0	0	0	1	6.57238	7.64981	6.99443	7.23117	9.16392	9.45122	0.748085	1.06012	3.40842	3.56309	5.33328	5.65505	7.59902	7.74983	6.19057	6.74721
ENSBTAG00000016227	ASCL1	1	0	1	0	3.26438	0.0330267	1.54609	4.44163	9.76777	9.81141	13.6562	13.493	1.07924	1.14869	1.70186	2.17699	9.89563	9.88091	3.96868	2.23419
ENSBTAG00000016234	DUOX2	0	1	0	0	2.88053	1.63492	10.342	9.64603	5.89384	5.86647	4.32655	3.98034	2.88201	1.82046	3.22695	1.90554	6.07828	5.2492	3.93899	3.4788
ENSBTAG00000016239	DUOXA2	1	1	0	0	2.33202	3.20611	10.0229	9.72855	5.79779	6.41843	2.63868	4.43013	1.43435	1.02581	1.89165	3.10748	6.03466	5.04425	4.76832	3.5654
ENSBTAG00000016283	TMEM63C	1	0	0	0	5.53419	5.66209	1.52637	0.959534	11.5707	12.0122	3.54914	3.74015	2.74942	3.40471	1.0984	3.34242	12.0436	12.3795	4.40305	3.97089
ENSBTAG00000016285	NGB	1	0	0	0	6.53513	6.22479	4.82292	4.14504	13.1673	13.8842	0.125803	0.150305	4.76229	5.89514	1.75767	3.00064	10.3927	11.0682	2.78233	0.630845
ENSBTAG00000016323	SLC7A14	1	0	0	0	1.009	2.34565	1.59203	0.922645	12.1203	12.6177	1.02322	2.09257	0.610455	2.28376	3.20144	4.04611	8.8742	9.19607	0.533905	1.66654
ENSBTAG00000016327	SLC28A2	0	1	0	0	2.87635	3.19147	2.65113	4.45321	3.00727	3.31309	0.0621363	0.663726	0.286101	0.93607	10.3121	10.2797	3.88695	3.26627	1.79936	2.23306
ENSBTAG00000016365	ABCG5	1	0	0	0	1.01429	0.804248	2.29047	3.42392	4.94179	4.09253	12.519	12.389	2.86072	0.984612	3.7996	4.2239	3.62051	3.02735	3.47317	3.10579
ENSBTAG00000016385	F10	1	0	0	0	9.72002	11.2957	5.67694	7.84784	9.77425	9.65012	16.3157	16.3453	6.79328	4.55879	7.10159	7.19006	5.74427	4.61155	9.04907	10.0085
ENSBTAG00000016389	UBL4B	1	0	0	0	3.08533	2.895	3.92846	3.46619	4.72393	2.43287	1.69544	1.58803	1.11343	1.79415	0.864881	0.125913	1.51375	1.1514	0.259096	0.710571
ENSBTAG00000016398	DNAJC22	1	0	0	0	6.2069	4.59754	3.80236	5.69672	1.56321	3.22473	12.4842	12.6446	1.34871	0.281625	5.91605	6.76226	6.98461	7.31028	6.83657	3.28632
ENSBTAG00000016413	DUSP26	0	1	0	0	1.58204	0.173141	0.763469	0.481572	5.38268	5.40679	2.15131	2.13476	8.37259	8.2354	2.27342	1.70416	2.4187	2.026	1.93999	1.08034
ENSBTAG00000016414	VDR	1	0	1	0	9.44946	10.8689	7.24535	7.47784	5.50574	6.63502	5.12734	5.56927	4.41372	6.46673	7.43404	8.34572	11.9898	11.8452	8.68984	9.47518
ENSBTAG00000016434	PDILT	0	1	0	0	0.0283583	0.07221	0.233133	0.308113	2.89731	4.35832	0.602352	0.677333	1.61134	1.13728	0.539887	1.73916	1.23381	0.509373	0.0572425	0.132222
ENSBTAG00000016446	GOT1L1	1	1	0	0	6.04876	3.54952	9.64737	9.16284	1.22052	3.82747	3.67866	3.79747	1.2467	1.47951	2.61177	3.44077	2.88709	2.83038	6.72222	5.96853
ENSBTAG00000016451	HSPA14	0	0	0	1	3.4417	3.22975	3.68635	3.48625	2.67148	2.50518	3.2816	3.22428	3.69374	3.69882	3.75264	3.67936	3.86289	3.73658	3.66714	3.48985
ENSBTAG00000016462	TCF7L2	0	0	1	0	2.68017	1.9938	3.08776	3.23731	3.2851	3.39252	0.578747	0.651827	1.71484	1.8451	2.75162	2.84815	2.73886	2.67671	2.87966	2.97702
ENSBTAG00000016477	C19orf35	1	0	0	0	4.69356	4.73353	2.71726	3.97104	5.86305	6.58062	3.79273	4.06852	0.145419	2.41272	4.58976	4.58397	4.56065	4.04624	5.0065	5.40462
ENSBTAG00000016485	OPN1SW	1	0	0	0	0.112888	1.26905	1.76487	0.664796	3.66044	5.6371	0.865316	2.29068	0.472771	0.638531	1.447	2.18451	5.12247	4.2729	0.0357012	0.857451
ENSBTAG00000016499	OPN5	0	1	0	0	0.0625167	0.10215	0.603657	1.29629	3.57065	3.55473	0.659312	0.6867	0.860478	0.887865	1.34777	1.38886	1.77302	1.54981	0.114207	0.141595
ENSBTAG00000016520	TPSB1	1	0	0	0	12.5752	12.0793	12.9386	12.759	7.19761	8.61026	8.66844	7.78712	11.1819	11.2384	12.625	12.015	9.29926	10.0705	12.6558	12.6932
ENSBTAG00000016525	ITGA1	0	0	0	1	3.33998	3.27281	2.92733	3.22943	1.0987	0.886214	3.14236	3.20587	0.935788	1.37268	3.01082	3.25469	1.9309	1.804	4.01009	3.97361
ENSBTAG00000016554	C3orf52	1	0	0	0	10.5806	9.96566	3.46895	3.42868	1.07878	0.0849537	6.97119	6.19083	3.42555	3.14544	5.45253	3.76767	8.99455	8.42117	8.90777	6.128
ENSBTAG00000016573	LHCGR	0	1	0	0	3.80026	1.87728	11.2102	11.3939	7.03468	6.67374	1.98761	2.36974	5.70158	5.02999	12.203	12.9434	2.18437	2.5217	1.89276	1.90099
ENSBTAG00000016575	PDIA2	1	0	0	0	9.98266	10.9299	5.45239	2.18928	10.5239	9.91204	0.233029	0.0548812	4.34384	3.11093	7.32829	7.23437	9.99877	9.22206	9.46389	10.3099
ENSBTAG00000016580	TEF	0	0	1	0	3.51499	3.83852	3.52637	3.82139	4.469	4.55247	3.12432	3.308	3.74085	4.01381	3.62124	3.62631	3.66726	3.84554	3.84195	4.30567
ENSBTAG00000016602	LBX2	0	0	1	0	7.91774	7.51581	3.80541	2.91858	6.47054	5.60812	0.963253	0.766358	2.34136	1.56273	3.53647	3.53405	4.96524	4.00516	6.49658	6.26171
ENSBTAG00000016620	SIGLEC15	1	0	0	0	3.94962	2.38891	5.80618	6.64154	0.0586	1.96755	0.566015	2.35256	0.760285	2.5322	6.55715	7.3555	0.181783	1.96831	2.2648	3.26633
ENSBTAG00000016645	GABRA4	1	0	0	0	6.18329	5.07571	1.3559	1.73743	12.0526	12.0164	0.647179	0.605439	0.32429	1.46821	4.1743	2.98914	4.38064	6.13437	2.28635	0.92511
ENSBTAG00000016651	ISL2	1	0	1	0	4.63888	3.16743	8.47715	6.8992	2.20787	2.402	1.00413	0.78041	1.22803	0.300634	3.01757	2.16108	10.8049	10.5548	0.834496	1.17067
ENSBTAG00000016662	CPS1	1	0	0	0	3.65703	3.75547	4.94936	7.43082	4.44898	4.94298	16.7016	17.0902	6.92512	5.82987	4.01342	5.82261	6.0801	5.53744	6.52917	6.54772
ENSBTAG00000016677	C1QL3	0	1	0	0	9.25123	7.40996	5.09353	5.86201	10.6749	11.1784	0.841969	1.597	6.97831	6.89948	7.05073	6.63976	7.10337	7.52452	12.2646	12.0688
ENSBTAG00000016723	GFI1	0	0	1	0	6.6644	6.2866	6.30753	6.79958	1.52138	2.83665	6.95741	7.13817	5.24224	5.76679	6.57314	6.69406	4.11888	4.80431	6.43299	6.56064
ENSBTAG00000016726	KIF15	0	1	0	0	3.83525	2.22532	2.2129	2.3905	0.668834	0.883494	2.30518	2.00992	1.65851	1.51261	6.47128	6.19201	1.62394	1.42109	4.66895	2.70837
ENSBTAG00000016748	E1BJE3	1	0	0	0	2.74806	4.63503	0.173152	0.412214	3.72721	4.11487	2.03608	3.02252	0.743533	0.982594	1.01327	0.529664	0.97503	3.09091	2.06374	3.51866
ENSBTAG00000016752	ASB10	1	0	0	0	5.03098	2.58488	7.95046	8.49386	0.0321512	2.29089	0.169336	1.5202	11.7484	12.0252	6.23963	6.02658	1.01052	1.66968	7.36331	8.10176
ENSBTAG00000016773	NXNL1	1	1	0	0	1.00941	3.24478	0.256826	0.288605	1.1726	0.448835	0.968201	1.7259	0.827206	0.858985	5.60364	5.37838	0.148467	0.167715	1.18856	0.467545
ENSBTAG00000016777	TEX101	0	1	0	0	5.02705	6.25548	0.315532	0.288191	0.119638	0.0922962	1.68274	0.977116	0.885911	0.858571	1.09034	0.384721	1.85135	1.61875	4.33268	4.38927
ENSBTAG00000016834	LHFPL5	0	1	0	0	0.08912	0.0740667	1.63888	0.684257	11.9028	11.8396	0.675071	0.626437	3.02146	1.51483	0.588046	1.61159	9.36286	8.85377	0.537611	1.35384
ENSBTAG00000016848	GTF2E1	0	0	1	1	1.67524	1.94024	1.3848	1.32044	1.86025	1.905	1.26528	1.30715	2.6193	2.74801	1.70616	1.75249	1.93004	1.9503	1.78906	1.62917
ENSBTAG00000016864	LBP	0	1	0	0	4.22099	2.86128	12.1947	12.4438	2.6598	3.4343	14.7261	14.4585	7.32854	6.63004	4.34315	4.56683	4.44062	4.14319	5.11747	4.6182
ENSBTAG00000016880	TAS2R3	1	0	0	0	1.63519	2.98621	0.885637	1.09662	1.04929	2.09258	0.22673	1.24839	1.67249	2.63094	1.22869	2.89106	2.862	2.99047	2.25311	2.61878
ENSBTAG00000016885	LRRTM3	1	0	0	0	3.87193	4.8334	0.291276	0.522821	7.81791	7.78979	3.29687	3.96826	1.10249	1.84497	0.0681013	0.299646	3.33944	6.05989	0.447911	1.38494
ENSBTAG00000016920	EOMES	1	0	1	0	6.06837	5.33676	5.22268	5.40974	3.6962	3.38098	7.66568	7.5808	0.645866	1.24172	6.92734	6.72135	1.66575	3.32661	5.53455	5.46839
ENSBTAG00000016926	C13H20ORF85	1	1	0	0	11.8656	11.5051	0.965709	0.703962	7.30734	7.98325	1.07401	0.105363	0.525784	0.997944	5.03988	2.25089	6.20162	5.44907	10.583	8.5008
ENSBTAG00000016928	PDZD7	1	0	0	0	6.28578	2.68309	4.69951	4.45099	9.39752	9.26295	0.0565162	1.82791	2.69549	3.56791	5.94806	6.10014	7.56469	7.56528	7.57681	7.35437
ENSBTAG00000016931	E2F7	1	0	1	0	7.22498	6.37937	2.56621	2.08807	5.42629	5.35984	3.47599	3.68682	3.39029	2.16207	7.81005	7.4964	6.61765	6.45753	7.18643	3.71771
ENSBTAG00000016968	CHST4	1	1	0	0	9.26186	8.28024	1.02193	0.264452	0.891076	0.0893925	0.624223	0.387983	0.825387	0.589147	2.07412	1.06057	0.840457	1.84649	6.57708	3.43208
ENSBTAG00000017005	LCN8	0	1	0	0	3.04315	3.69047	0.150649	0.074325	8.56278	8.01274	0.519869	0.443545	1.86662	1.0117	7.66051	7.95286	1.92715	1.55304	1.13076	0.26876
ENSBTAG00000017020	S100G	0	1	0	0	14.6645	16.3848	16.0551	16.4192	3.93364	4.38457	6.68303	7.56711	9.56689	8.4454	5.51072	4.53432	4.94748	4.76276	14.5567	15.3767
ENSBTAG00000017026	DEPDC1B	1	1	0	0	4.88192	4.91548	2.95683	3.59211	1.52779	3.44863	4.76051	5.0723	0.799352	0.15181	9.62366	9.30315	5.00798	5.20631	6.71553	3.56037
ENSBTAG00000017029	CCDC163P	1	0	0	0	6.15478	5.61916	5.53668	5.62571	7.62725	7.98125	7.06632	7.21737	0.700753	2.80337	5.96052	6.05131	3.80975	3.62727	6.41265	6.67723
ENSBTAG00000017035	USF2	0	0	1	0	9.61727	9.69407	10.1447	10.2286	10.3049	10.4431	10.0881	10.1127	10.252	10.3073	9.93467	9.88901	9.86689	9.84566	9.46597	9.62546
ENSBTAG00000017042	HAMP	1	1	0	0	1.61465	3.82865	3.01891	5.35686	3.08426	4.37725	16.1554	16.7785	4.0668	2.49501	2.64425	4.03728	0.16042	3.49476	1.24916	3.98733
ENSBTAG00000017044	MAG	1	1	0	0	4.73807	5.47547	4.0521	3.33878	15.5216	15.9212	4.27616	3.67288	5.68935	6.03265	3.02069	2.83896	2.25829	4.86312	2.06569	2.68269
ENSBTAG00000017045	FABP2	1	0	0	0	5.03422	4.53257	3.31659	2.25695	0.452766	1.20185	4.14972	3.99878	2.82126	3.63328	4.1765	5.31384	6.36216	4.23633	2.78043	0.855249
ENSBTAG00000017067	WBSCR22	1	0	0	0	6.63364	6.68223	6.78833	6.70815	6.30736	6.4634	6.12713	6.26868	6.73244	6.76899	7.6482	8.93865	7.34985	7.53937	6.8465	6.57145
ENSBTAG00000017071	C1QTNF3	1	0	0	0	10.4284	8.00743	12.1194	11.5467	6.02007	4.76754	6.00536	5.97454	10.765	10.5985	10.0679	8.46538	5.18856	5.28381	12.0674	11.7941
ENSBTAG00000017072	ZNF384	0	0	1	0	3.64961	3.59284	3.64149	3.5057	2.74779	2.69357	3.08106	2.92145	3.62167	3.61906	3.60147	3.48532	3.32629	3.28416	3.5537	3.4824
ENSBTAG00000017094	SHMT1	0	1	0	0	1.63538	1.71173	4.13063	4.72501	3.23988	3.21578	9.19034	9.27936	1.36974	1.31121	0.769616	0.705154	0.329	0.253668	1.67117	2.09198
ENSBTAG00000017098	BPIFA1	1	0	0	0	5.01748	8.99726	0.954191	1.2856	2.38107	1.60421	0.181321	1.1924	0.0933812	0.491101	0.933225	2.00074	2.7396	2.95675	2.84805	7.69473
ENSBTAG00000017104	MUC1	0	1	0	0	12.1455	12.6528	6.17844	6.13294	3.20245	3.68502	3.36053	4.16504	2.65346	3.93831	6.00846	4.93945	5.54278	4.57357	10.6008	9.4529
ENSBTAG00000017105	FSTL4	1	0	0	0	3.45254	2.66445	5.0248	5.77558	9.65547	10.1517	4.04638	5.86904	1.3515	2.82855	6.81151	8.18064	6.86355	6.87069	2.51076	3.48179
ENSBTAG00000017121	ALB	1	0	0	0	4.23353	4.051	4.14953	7.05532	3.87082	4.14969	16.3881	16.6695	6.15752	5.00112	2.80149	5.24685	5.42789	4.52745	6.02415	6.07564
ENSBTAG00000017136	SSTR2	1	0	0	0	6.01305	2.61489	1.85688	0.959536	11.2683	11	0.935024	0.0428363	5.21696	3.27619	7.05198	7.23541	9.90974	9.71015	4.02336	4.60479
ENSBTAG00000017150	EHF	1	1	1	0	12.5314	12.3924	4.93615	5.08043	1.97071	2.6354	8.32184	8.10175	3.18615	2.85979	6.17735	4.24092	7.8171	6.96362	10.8016	8.71396
ENSBTAG00000017158	VSNL1	1	0	0	0	6.3373	8.03562	4.63673	5.22712	14.7496	14.9764	8.92015	9.44327	3.59251	5.52407	5.61021	6.08899	10.3105	10.6885	6.46959	6.77026
ENSBTAG00000017169	C1orf43	1	0	0	0	0.430222	1.59201	1.69895	1.85396	3.41734	3.37878	1.21776	2.77764	2.15723	2.30493	2.15747	2.68504	0.451638	1.33572	0.0151325	0.180023
ENSBTAG00000017180	SLITRK3	0	1	0	0	7.24172	4.85655	1.17904	0.780721	10.9316	10.8962	0.666552	0.0422662	1.1054	0.930306	3.62877	3.75173	4.94943	5.64229	10.1919	8.39166
ENSBTAG00000017194	ASPG	0	1	0	0	12.4179	13.4015	3.66351	3.41376	4.12635	2.70425	12.8892	12.8958	2.64347	2.03632	0.139436	1.40178	1.13651	1.02383	11.8834	11.8801
ENSBTAG00000017198	CHRNA4	1	1	0	0	1.20122	0.450622	0.311723	0.327699	12.6673	13.0882	0.680943	0.696919	0.882108	0.898084	0.0885475	0.104524	1.22269	3.17566	1.97084	0.739659
ENSBTAG00000017199	GKN2	0	1	0	0	0.0425533	0.0452133	0.249688	0.286992	0.0537925	0.0910975	0.618903	0.656208	0.820067	0.857372	2.65342	3.29265	0.137343	0.162922	0.0737975	0.111102
ENSBTAG00000017205	WISP3	1	0	0	0	9.33799	9.21649	3.69268	2.68109	3.57855	4.7305	2.38675	1.46957	0.909689	2.01163	7.32389	7.44612	10.3778	10.2298	5.29926	2.19139
ENSBTAG00000017220	GH1	1	1	0	0	5.11451	9.19294	11.7889	8.35626	6.99184	9.03787	7.90888	10.5329	13.9106	12.6276	12.7835	12.6657	23.7987	23.7851	7.22031	9.30111
ENSBTAG00000017243	GATA3	0	0	1	0	1.99756	1.90134	4.67846	4.81353	2.31091	1.89677	2.31332	2.14444	3.11796	3.24734	2.52361	2.30688	1.06492	1.33235	1.14472	1.2454
ENSBTAG00000017294	AGP	1	0	0	0	11.1676	10.348	11.7719	13.9559	10.0988	12.7811	22.4946	22.793	11.9649	9.89936	11.3025	12.3982	11.7964	10.7395	12.2923	12.2521
ENSBTAG00000017301	AVPR1B	0	1	0	0	1.23882	0.547002	0.487822	1.17108	0.319997	1.06281	0.870667	1.58284	0.791682	0.909496	1.5547	2.21473	10.8641	11.324	0.0454125	0.163226
ENSBTAG00000017305	O77624	0	1	0	0	1.59227	0.428857	0.244693	0.19229	1.82333	2.19944	0.613912	0.56151	0.815078	0.762675	2.88439	2.93824	0.120055	0.08935	1.10146	0.347215
ENSBTAG00000017312	SST	1	1	0	0	4.83474	4.20476	0.838351	1.18252	15.0186	15.9	1.81321	3.26588	1.86285	3.05968	2.41758	5.90464	2.36299	4.65983	6.32776	4.59173
ENSBTAG00000017352	ZC3H11A	0	0	0	1	8.16709	8.09827	7.90749	7.89793	7.09895	7.02066	7.52631	7.48187	8.29609	8.26588	8.01231	8.01306	8.18123	8.15269	8.1436	8.18417
ENSBTAG00000017368	YBX1	0	0	1	0	15.2541	14.7406	16.0483	15.9937	14.3097	14.3093	15.3419	15.2965	16.9776	16.9097	15.8007	15.5865	14.3998	14.3553	15.9272	15.6832
ENSBTAG00000017391	HS3ST2	1	0	0	0	2.7606	0.041695	7.51581	6.53399	9.76351	9.56632	1.7052	0.0709687	5.58197	5.11623	2.57902	1.2026	6.85677	6.16338	7.65377	6.47894
ENSBTAG00000017396	CENPA	1	0	0	0	1.86136	0.0994217	1.44268	1.45898	1.64699	2.30096	1.38939	0.417401	0.408646	0.239941	1.61867	2.37283	3.29589	1.78041	2.48484	0.397846
ENSBTAG00000017401	TBK1	0	0	0	1	2.54907	2.74056	2.46	2.41681	2.72199	2.69351	2.87037	2.85661	2.27076	2.34061	2.59375	2.7	3.15648	3.13879	2.39872	2.47478
ENSBTAG00000017409	DLX3	1	0	1	0	7.29383	5.91925	5.29043	4.48347	3.05051	2.8686	0.23376	0.025515	1.97213	3.01238	5.5548	6.07449	8.93197	8.14129	6.7878	2.80098
ENSBTAG00000017420	ZMAT4	1	1	0	0	3.99639	2.57855	1.33695	2.0143	11.2609	11.3243	3.63749	3.16554	0.134161	1.08506	10.9286	11.1977	9.79872	9.87749	3.04321	0.838485
ENSBTAG00000017424	VAPB	0	0	0	1	7.53958	7.72963	8.5564	8.6218	8.58118	8.72806	7.97807	7.99117	8.31265	8.38125	7.99902	8.00211	7.91964	7.96133	7.55736	7.55451
ENSBTAG00000017431	GPR55	1	0	0	0	5.47578	2.39216	6.51196	6.57022	1.19396	0.903045	7.14208	6.94639	1.75352	1.62476	5.99849	5.74178	2.79044	0.322095	6.06258	4.32515
ENSBTAG00000017471	KBTBD13	0	1	0	0	1.29985	0.499118	0.810204	2.0712	3.7725	3.41291	0.624784	0.709077	10.6536	11.0053	1.50201	2.12822	0.468773	1.15305	0.0796787	0.163972
ENSBTAG00000017478	GSDMC	1	0	0	0	6.69185	4.1245	0.404994	0.0655738	3.27686	3.5363	2.12547	2.46433	0.975379	0.635959	4.1234	2.40404	2.90776	1.45804	6.13389	2.46951
ENSBTAG00000017489	TSHR	1	0	0	1	2.56912	4.75641	0.971009	1.0766	5.62545	7.37696	2.51244	2.95663	7.18765	7.3359	0.29839	2.15415	8.05851	7.36542	0.66643	0.976051
ENSBTAG00000017492	PCMTD1	0	0	0	1	7.1063	7.17137	7.67	7.89487	6.20965	6.25148	7.45169	7.44068	8.12692	8.29364	7.08464	7.15879	7.14975	7.07486	6.96263	7.24768
ENSBTAG00000017509	MYPN	1	1	0	0	3.33105	4.16034	3.56943	1.59754	2.55231	3.73541	3.66997	3.71435	14.7804	14.7254	3.95421	3.59968	3.9846	4.43822	3.38159	3.59501
ENSBTAG00000017521	ATOH7	1	0	0	0	5.75954	4.4061	4.59318	3.64277	4.14233	1.9491	1.86738	1.72355	0.474424	0.205601	2.82683	1.46025	1.85115	1.43549	4.6745	4.20525
ENSBTAG00000017528	SNAI3	0	1	1	0	2.95773	0.700905	2.43698	1.67542	1.68046	2.60278	1.73738	1.61187	10.8474	10.9388	3.64933	2.89595	2.93507	3.96409	0.96131	0.120453
ENSBTAG00000017531	FETUB	1	1	0	0	3.41288	3.05251	2.65834	5.53118	1.82763	1.91875	14.6775	14.8618	4.11338	1.86455	1.08628	3.245	3.17897	1.34073	2.41378	4.42569
ENSBTAG00000017541	TBX20	1	0	1	0	4.55838	0.50637	4.62104	3.05051	1.98446	1.61544	7.20393	6.64059	3.59969	2.71513	2.55337	4.25397	10.2177	9.81093	5.15846	2.92994
ENSBTAG00000017587	WFDC9	1	1	0	0	0.0290117	0.11003	0.245466	0.344166	0.0495763	0.148276	0.614686	0.713386	0.815851	0.914551	0.0222912	0.120991	1.1703	3.24824	0.0695813	0.168281
ENSBTAG00000017593	TREM1	1	0	0	0	1.1182	1.23641	6.21121	6.48653	0.910759	1.63321	6.50113	6.44744	2.79107	2.9143	6.95169	6.72141	0.246997	1.99072	2.07807	2.00117
ENSBTAG00000017615	PRLH	1	0	0	0	2.74172	2.61622	1.15777	3.15278	0.113626	0.309028	4.79405	5.95744	0.879906	1.07531	0.0863462	0.281748	0.669028	1.71344	0.133631	0.329032
ENSBTAG00000017617	C6orf222	1	0	0	0	6.20866	6.48491	4.19816	3.91424	4.75472	5.53253	1.35039	0.0779975	3.01192	2.65202	8.82256	8.66897	5.15025	4.95076	5.25274	5.15449
ENSBTAG00000017627	STMN4	1	1	0	0	6.63477	6.84853	1.6985	1.59915	15.4476	15.6157	2.30526	2.57589	1.89198	4.6573	2.65482	3.64401	9.74053	9.92521	5.05422	3.10891
ENSBTAG00000017642	BMP3	1	0	0	0	8.67558	8.26829	8.73467	7.82423	8.51729	8.71298	1.32851	0.0627862	4.82335	4.81489	7.7066	8.08439	7.21249	7.10577	7.18203	7.89944
ENSBTAG00000017656	ST3GAL3	0	0	0	1	3.14217	2.57313	3.51715	3.49468	4.02837	4.0954	5.62859	5.56334	5.86015	5.76885	4.13638	3.93074	3.72242	3.77677	3.53544	3.64757
ENSBTAG00000017663	GAST	1	0	0	0	2.19423	1.98074	4.87531	4.04486	7.12788	7.82224	0.600441	0.373634	7.66686	6.55444	1.22189	0.170094	3.21438	0.784599	1.22135	0.202059
ENSBTAG00000017678	SPRED3	1	0	0	0	7.43282	7.43185	6.15254	5.73803	9.62681	9.5567	1.52566	0.047865	2.38251	2.40447	6.64486	6.72581	9.65016	9.8585	7.05726	6.7784
ENSBTAG00000017684	NMUR1	0	1	0	0	3.40678	3.23606	9.09967	9.51312	1.40973	2.25508	1.58746	1.65469	4.19512	3.82038	5.84601	5.21486	2.27988	3.66581	0.120085	0.8295
ENSBTAG00000017714	C4BPB	1	1	0	0	2.67496	1.35944	2.83074	4.64914	1.28129	2.88623	14.7667	14.831	4.36785	2.15855	1.0807	1.69272	3.82245	1.52164	3.64779	2.29006
ENSBTAG00000017733	CA2	1	0	0	0	4.22685	1.40945	2.86465	2.54384	5.28148	5.10934	1.59423	1.29718	5.7055	5.0784	1.6047	1.62501	3.22419	2.88919	4.91041	1.45257
ENSBTAG00000017743	XIRP2	1	1	0	0	1.35653	4.23705	4.46473	3.19152	2.22259	3.28537	3.20226	3.32958	15.2283	15.4808	4.63991	3.80167	4.21216	4.97598	3.68217	3.16959
ENSBTAG00000017762	GNG8	1	0	0	0	6.1409	3.4056	5.90307	6.14205	9.16104	9.40416	0.164444	0.202179	2.729	3.96356	5.46164	4.4591	6.09408	7.84384	7.36808	8.173
ENSBTAG00000017785	FRMPD4	1	0	0	0	5.37722	6.45985	7.19937	7.4716	10.073	10.4185	0.020125	1.28899	3.97963	3.84593	4.99504	5.34622	7.77718	8.13288	4.77354	6.20737
ENSBTAG00000017800	DMRT3	1	1	1	0	7.08639	3.31387	9.1682	8.46818	0.455719	1.56634	1.00822	2.09206	2.0987	0.986467	0.211144	0.860754	3.54748	3.11092	9.59925	8.6287
ENSBTAG00000017837	GABRB1	1	0	0	0	5.72478	5.65728	3.10991	3.52831	10.9891	11.0322	0.15634	1.36397	2.79813	2.16051	7.86648	7.98494	9.84501	9.60078	5.44664	4.9941
ENSBTAG00000017864	PRPH	1	0	0	0	4.4847	3.27278	1.87839	0.0972237	9.74823	10.2293	0.701886	0.645881	1.54255	2.91092	6.45957	6.52923	5.28818	5.28825	4.20345	4.92033
ENSBTAG00000017866	CD36	0	1	0	0	2.06998	1.5859	10.1533	10.163	1.31551	1.51215	3.47352	3.46462	7.27647	7.09455	4.17473	4.3735	2.95423	2.7153	1.45901	1.47542
ENSBTAG00000017873	USF1	0	0	1	0	5.09725	5.07671	5.27061	5.2336	5.71737	5.76766	4.60986	4.56086	4.75692	4.76776	5.10499	4.95935	4.75855	4.65517	5.0087	5.10064
ENSBTAG00000017911	HMX2	1	0	1	0	0.0293433	0.232992	0.585526	1.51843	4.93735	7.69156	3.62487	3.58093	0.813751	1.02074	0.0201913	0.22718	0.485015	1.38992	0.0674813	0.27447
ENSBTAG00000017976	ABL1	0	0	1	0	3.83484	3.45486	4.62798	4.34057	2.11701	2.17885	1.4751	1.39655	2.94628	2.82318	3.79135	3.60866	3.11659	3.19518	4.06163	4.00174
ENSBTAG00000017980	QRFP	1	0	0	0	0.0611317	0.30313	1.86515	2.10856	1.02633	3.19014	0.667099	0.869838	2.47535	2.70288	0.477289	1.53414	0.595742	1.63661	0.121989	0.324727
ENSBTAG00000017981	ADRB3	0	1	0	0	5.54399	2.49271	10.7553	9.99442	3.88387	3.89721	6.38068	5.73656	3.09206	2.30918	3.41607	3.14597	3.7631	3.60941	6.54498	5.00265
ENSBTAG00000018054	FABP1	1	1	0	0	4.24026	3.97657	3.84322	7.70186	2.58494	2.70293	17.4836	17.6883	7.25085	5.90566	3.1812	6.11641	5.53028	3.13138	7.04345	7.01792
ENSBTAG00000018071	TMOD4	0	1	0	0	1.36978	1.43972	1.77875	1.45436	1.94664	2.14665	0.672006	0.76644	10.7616	10.6886	0.950425	0.655981	1.29478	1.21409	1.14451	1.16878
ENSBTAG00000018074	VPS72	0	0	1	0	4.57649	4.89153	4.16502	4.02153	4.28569	4.27054	3.47571	3.54424	3.72269	3.79787	4.28627	4.25214	4.07609	4.02485	4.38567	4.45258
ENSBTAG00000018085	GTSF1	0	1	0	0	4.15908	2.1838	3.29464	3.15897	4.92026	5.85144	6.06618	6.60984	0.254311	0.141041	9.31352	8.50191	2.79943	1.44802	3.2501	2.55508
ENSBTAG00000018127	PPM1A	0	0	0	1	6.4657	6.71581	7.1388	7.28422	6.31915	6.34845	7.26984	7.31919	8.59436	8.74918	6.27459	6.36568	6.66767	6.67728	6.38509	6.56239
ENSBTAG00000018146	VAT1L	0	0	0	1	9.49847	8.56168	10.98	10.7617	14.3808	14.8625	4.55529	5.53883	8.71436	8.49525	9.76661	10.0014	10.4558	10.814	10.177	10.4615
ENSBTAG00000018147	NXPH2	1	0	0	0	5.09319	4.80758	6.43835	6.15072	8.54515	8.73913	2.50417	1.92017	4.92412	3.67303	1.39149	2.13392	2.42689	4.88644	3.43841	4.60355
ENSBTAG00000018158	TMEM139	1	0	0	0	7.88005	6.91382	3.11425	2.92687	5.12834	5.08362	5.94018	6.11433	1.48941	0.0465825	6.75167	6.42888	8.3673	8.15994	7.56736	6.5944
ENSBTAG00000018160	LAMA1	0	1	0	0	6.04723	3.5464	1.90558	2.16772	7.79266	7.59435	0.882397	1.06426	1.96706	1.7572	11.2231	10.9125	4.13655	4.27551	5.66392	2.9136
ENSBTAG00000018165	FAM65B	1	0	0	0	0.619793	0.452571	0.931534	1.13167	4.06731	4.13529	1.62789	1.87071	1.81718	2.11359	1.6751	1.69867	1.34121	1.61404	1.19009	3.01309
ENSBTAG00000018170	UTS2R	1	0	0	0	0.0387533	0.188748	2.07052	0.973494	6.17981	7.60523	0.624399	0.761162	4.74384	5.33296	0.0320037	0.168768	2.98962	5.31841	0.0792937	0.216058
ENSBTAG00000018189	CSTB	1	1	0	0	7.29051	7.96254	8.36807	8.35268	4.23883	5.09987	5.8696	6.51112	2.65081	1.53496	11.0619	10.8458	0.154223	2.66527	6.47906	4.40729
ENSBTAG00000018204	MYH1	1	1	0	0	7.6442	10.5397	10.3187	6.95967	6.93233	9.06069	9.89509	9.59658	22.3353	22.3076	11.2365	10.1583	11.4676	11.7473	9.09919	8.56581
ENSBTAG00000018218	FAM135B	1	0	0	0	3.45984	8.28174	2.50805	2.75729	10.4154	10.9865	1.26528	1.05024	0.658625	0.992624	0.08309	0.879644	3.37081	4.0991	1.97249	4.41432
ENSBTAG00000018224	GLP1R	1	0	0	0	5.73253	5.23061	4.86216	2.83227	7.8038	7.64777	1.62685	1.29016	4.06257	2.61214	6.31439	5.89556	7.87368	7.49097	4.63039	2.65095
ENSBTAG00000018232	STOML3	1	0	0	0	6.47051	6.06407	6.72869	6.33093	7.09127	7.72006	0.88184	0.780335	3.17591	0.685136	4.83723	5.60966	9.22905	8.82762	4.67398	3.46077
ENSBTAG00000018234	CDH9	1	0	0	0	6.98416	6.52625	2.41139	1.80741	9.39179	9.45891	0.154646	1.90823	0.669165	0.790063	4.16521	2.73797	6.40833	6.25347	3.5627	4.20449
ENSBTAG00000018240	CYP2S1	1	0	0	0	7.14106	6.27756	3.59517	1.4212	5.66415	5.82518	6.22602	6.08536	3.65656	4.28204	6.72676	5.86746	6.40613	6.06256	6.61851	5.26925
ENSBTAG00000018244	VSTM2B	0	1	0	0	0.444737	2.38104	5.09578	3.91997	10.2208	10.1574	0.15971	0.142086	2.59602	1.05928	0.927232	0.902094	4.77227	6.02865	1.01212	0.980874
ENSBTAG00000018253	CHRNA1	1	0	0	0	4.71547	4.81722	9.12194	9.48211	1.17641	3.05364	1.96856	2.13507	12.8095	12.9665	4.74265	4.97293	6.66325	6.83088	4.80938	5.79426
ENSBTAG00000018262	DNAJC5G	1	0	0	0	1.61134	5.26189	0.214235	0.378634	0.3542	1.23115	1.62671	1.08206	1.82788	1.28322	1.45508	1.64605	0.0872467	0.253979	0.47736	1.57316
ENSBTAG00000018267	TRIM54	1	1	0	0	1.46074	4.04365	3.87218	2.20948	2.05636	3.96088	3.09458	3.36202	15.5535	15.5045	4.8689	4.3453	4.2006	4.35108	3.35024	4.06442
ENSBTAG00000018268	UCN	1	0	0	0	1.64558	2.57699	3.11619	1.29444	6.01468	4.03715	1.15057	0.929049	2.11088	3.42503	3.72216	2.61235	4.65682	1.64291	4.60742	5.56171
ENSBTAG00000018280	SLC28A3	1	1	0	0	10.923	12.2773	4.69192	4.5274	1.43391	3.45658	7.15484	7.13884	2.36678	3.06601	2.94137	1.57012	4.23212	3.97481	10.152	10.7922
ENSBTAG00000018287	SLC25A48	0	0	0	1	6.95722	8.16562	2.45617	3.2531	11.0088	11.41	10.6214	10.6741	3.61167	2.62108	1.56247	2.18794	2.40113	1.04874	3.73698	5.46499
ENSBTAG00000018300	TNFRSF19	0	0	0	1	3.77181	3.52178	0.450721	0.409663	3.06445	2.87161	1.35503	1.14757	1.37583	1.54094	3.54127	3.18627	2.19168	2.17173	2.8447	2.24223
ENSBTAG00000018345	FBXO39	1	0	0	0	3.85043	5.7105	2.81346	3.36659	2.68115	1.03953	6.23928	6.26438	0.864942	1.48299	2.77624	3.38846	3.98295	4.24284	4.43251	4.77075
ENSBTAG00000018352	ABRA	0	1	0	0	2.20603	2.02022	3.45899	3.11686	1.03422	2.61811	2.41029	3.35119	14.8113	14.5536	1.68316	2.70036	4.33819	4.52853	4.74266	4.05689
ENSBTAG00000018365	CYP2E1	1	1	0	0	6.28361	6.21802	6.55571	9.19248	3.08062	3.86442	18.4847	18.6166	8.13328	6.48812	4.03808	6.96774	6.62766	3.96278	8.22514	8.15838
ENSBTAG00000018369	MYL2	1	1	0	0	4.41592	8.36352	8.80691	5.87537	8.5326	9.3111	7.64805	7.6974	20.5615	20.4476	9.94057	9.63747	10.0266	10.0338	7.20174	7.24612
ENSBTAG00000018404	PRKG1	0	0	0	1	2.62035	1.18854	2.38945	2.44947	1.7556	1.80105	0.130861	0.219772	3.60341	3.64489	2.98984	2.89902	1.1324	0.931895	4.24833	4.15956
ENSBTAG00000018416	CCDC42	1	0	0	0	1.22811	2.05229	1.36123	1.51848	2.41167	4.49911	11.4944	11.6078	5.75229	6.08051	6.90968	6.07644	3.07798	0.117574	1.75405	1.6371
ENSBTAG00000018418	TMEM74B	1	0	0	0	5.59206	6.68606	4.53429	2.78311	8.57997	8.90386	1.70628	0.758944	4.42324	4.96997	5.83434	3.8952	3.69742	3.20361	5.26896	3.31609
ENSBTAG00000018440	TAS2R4	0	1	0	0	1.74657	1.88135	0.153284	0.286219	1.66773	1.72003	0.522504	0.655439	3.04541	2.47872	1.71366	2.73787	2.24154	3.04689	3.62713	5.30015
ENSBTAG00000018442	PRSS37	1	0	0	0	2.85079	2.3512	0.127706	1.18928	3.86363	4.07576	0.113496	0.361599	0.702636	1.77386	1.8416	1.39093	0.562358	2.59935	0.748736	3.50104
ENSBTAG00000018460	ADAMTS16	0	1	0	0	5.58743	7.57263	11.1967	10.8576	6.92925	7.61598	0.618461	1.92505	7.29992	6.94633	4.85593	5.17267	3.27241	3.65218	4.9666	6.69188
ENSBTAG00000018474	IL6R	0	0	0	1	4.77821	6.46378	5.06774	5.18233	2.91623	3.24949	5.37125	5.39084	3.73241	4.06673	2.68066	2.58635	2.13283	2.25972	3.71848	4.07335
ENSBTAG00000018495	NKX6-3	1	0	1	0	0.0490483	0.206023	0.23883	0.427939	7.11582	7.37806	0.91946	1.76924	6.01562	7.20371	0.462105	1.59839	6.48804	6.49542	0.386515	1.26211
ENSBTAG00000018508	TMEM108	0	0	0	1	5.89929	5.12922	5.33861	5.0878	9.26781	9.55385	2.35936	3.07355	5.86515	5.58881	6.42491	6.40088	9.90148	10.2115	6.25549	6.26418
ENSBTAG00000018519	GAS2L2	1	0	0	0	10.6214	10.4813	9.52873	8.86804	8.51145	8.59039	1.57916	0.0403875	3.71315	2.59531	6.4471	4.46281	3.21013	2.78503	9.6571	8.11193
ENSBTAG00000018543	VIL1	1	0	0	0	7.31105	10.3313	5.26473	6.1128	3.12845	4.33742	6.20219	7.30105	2.85715	4.19577	4.14266	4.01664	1.71213	3.0006	6.96363	9.72614
ENSBTAG00000018552	VWC2L	0	1	0	0	0.05404	0.15598	1.65325	1.78256	10.511	10.7713	0.637649	0.721632	1.19494	2.03447	1.49195	1.5425	4.70438	4.4838	0.440569	1.26291
ENSBTAG00000018554	GAPDH	1	0	0	0	6.67875	7.83151	0.806323	0.247192	2.32555	3.11816	4.60882	4.84133	7.89426	6.54244	2.87105	3.52916	0.55768	2.14797	3.46286	3.93383
ENSBTAG00000018556	MGC137211	1	1	0	0	4.00396	3.99006	5.09335	7.84299	2.55806	3.59449	17.3471	17.3858	6.4765	4.10954	3.0806	5.62245	5.64692	3.3212	6.80492	6.65866
ENSBTAG00000018566	SFRP5	0	1	0	0	3.73072	3.32487	10.1866	9.60857	3.56011	3.79147	0.813862	0.842454	6.98255	5.97991	4.99246	4.46464	2.9541	2.73351	3.91826	4.19999
ENSBTAG00000018645	DLX5	0	0	1	0	11.9774	12.3614	8.43558	8.047	7.12709	7.55549	3.07844	1.51179	2.21643	1.4741	3.59199	2.68917	7.74351	7.66596	11.2459	10.3636
ENSBTAG00000018652	CXCL17	1	0	0	0	7.05474	6.84465	5.84056	6.77463	2.88246	3.14549	10.793	10.4143	0.884399	0.0886513	6.09242	3.37395	3.61412	4.19694	6.37429	5.67704
ENSBTAG00000018657	ATP13A5	1	1	0	0	11.2345	13.7213	2.25022	1.5351	2.69589	3.93569	2.11398	2.51716	3.12302	3.76745	1.4044	1.03622	1.53604	3.21865	9.16502	9.9334
ENSBTAG00000018707	LDB3	0	1	0	0	1.85553	2.27208	2.41423	1.68126	4.83805	5.1313	2.47023	2.06122	12.996	13.0007	3.06649	2.63425	2.63757	2.81427	2.07662	2.35044
ENSBTAG00000018710	TTF1	0	0	1	0	3.14408	3.44373	3.04195	2.99677	2.07196	1.98931	2.42342	2.34518	1.71511	1.91083	2.55014	2.54857	2.78123	2.79973	2.70649	2.95734
ENSBTAG00000018775	TPX2	0	1	0	0	1.62948	0.684801	1.36444	1.41988	0.864234	0.748529	1.06499	1.27589	2.30708	2.40136	3.77022	3.5957	0.47859	0.450659	2.07091	0.687048
ENSBTAG00000018778	TMC1	1	0	0	0	4.30221	1.73671	4.56938	3.66646	3.52069	3.9073	1.20948	0.56083	1.57756	3.03465	4.20714	4.20615	4.57204	4.60196	4.85717	4.54722
ENSBTAG00000018792	SLC22A11	0	1	0	0	3.15669	1.90401	0.843381	0.137074	0.938869	0.791243	0.369343	0.236154	1.37834	0.696109	1.45254	1.62658	0.96893	0.0560537	6.65266	6.50476
ENSBTAG00000018805	ASB13	0	0	0	1	1.06981	1.05482	0.982809	0.957971	1.07723	1.20814	2.57415	2.64293	0.919757	0.824404	0.997966	0.9085	0.517309	0.48254	0.969611	0.88669
ENSBTAG00000018810	THBS2	0	1	0	0	1.61313	0.22755	3.61018	3.04325	1.76085	1.70368	1.75467	1.50608	2.31886	1.78932	6.37924	6.15772	0.809972	0.809321	1.59381	1.24271
ENSBTAG00000018811	TMC2	0	0	0	1	4.84671	3.27367	2.63968	2.80675	2.36521	2.12356	2.49683	2.00615	0.746126	0.799151	3.61818	3.53765	7.24358	7.26024	5.15121	4.55247
ENSBTAG00000018817	POU4F3	0	0	1	0	1.23037	0.33452	0.112649	0.125914	3.14447	4.69947	3.50818	4.46251	0.683029	0.696294	2.39851	1.61814	1.97638	1.9183	0.952644	0.275464
ENSBTAG00000018831	DAO	1	0	0	0	5.96329	6.40324	1.65115	2.11419	9.458	10.2052	13.6837	14.139	0.0863488	1.74317	5.07535	6.07411	0.0413967	2.68706	4.06536	5.70971
ENSBTAG00000018843	SERPINA1	1	0	0	0	8.32333	8.26921	7.85411	10.4371	5.3491	6.37984	19.6961	19.8155	9.40173	8.32202	7.47591	8.94803	9.84293	10.0175	9.42749	9.55649
ENSBTAG00000018852	APC	0	0	0	1	2.92926	3.52467	3.42381	3.57847	4.32503	4.37292	3.82153	3.75761	3.31721	3.47384	2.99462	3.15837	3.57649	3.57867	2.81268	2.97166
ENSBTAG00000018861	C12orf56	1	0	0	0	7.14385	6.19876	4.4014	4.35663	6.91785	6.79248	4.65848	3.89602	3.1921	0.845635	6.98052	6.78464	6.78015	6.36537	7.66789	6.11773
ENSBTAG00000018965	PRDM16	0	0	1	0	3.264	3.29559	5.208	5.14938	4.09404	4.13054	0.376754	0.573403	2.98025	3.33532	2.90037	2.55104	1.86491	2.10231	2.45107	2.76225
ENSBTAG00000018987	RPS25	1	0	0	0	3.72312	3.91509	1.99237	0.148895	5.54718	6.14224	3.431	3.29775	4.96085	4.79934	5.07278	6.30097	5.38683	5.84112	4.67619	4.77604
ENSBTAG00000018996	PARK2	0	0	0	1	0.460509	0.44507	2.60381	2.66106	1.95897	2.09573	1.13667	1.15969	2.65074	2.59902	0.981984	1.13053	1.84845	1.98969	0.754089	1.06333
ENSBTAG00000019028	STOX1	1	0	0	0	9.22708	8.5647	2.82944	0.498478	10.3431	10.0823	1.30274	1.21444	5.91837	5.34549	6.0331	5.48014	11.3449	10.9758	8.74522	6.56466
ENSBTAG00000019036	ARHGAP28	0	0	0	1	5.64125	4.40288	5.51398	5.49186	1.43188	1.49386	1.23778	1.22477	3.92916	4.03677	7.54858	7.56635	6.63301	6.43312	5.72002	5.73065
ENSBTAG00000019039	ZNF239	0	0	1	0	1.94266	1.09984	2.14976	1.56134	3.76144	3.45773	1.24699	0.975156	2.37271	2.23932	2.44049	2.26303	3.28659	3.03168	2.43063	2.00228
ENSBTAG00000019041	FAM19A1	0	1	0	0	0.0795017	0.0542117	1.40981	0.590456	10.6743	10.4696	1.86715	0.987906	2.08236	1.19357	0.706272	1.98186	11.7215	11.6343	0.122242	0.0584413
ENSBTAG00000019058	IQSEC3	0	1	0	0	2.16124	2.9334	2.24049	0.555699	12.1577	12.3122	2.07613	1.23526	2.0186	2.9557	3.40414	3.17028	12.6805	12.9233	1.68544	1.99313
ENSBTAG00000019066	FAM167A	1	0	0	0	8.15466	8.6887	3.88059	4.28674	11.4126	11.6821	8.15468	8.34955	0.0209225	1.80231	6.26465	6.32087	4.82724	5.18655	7.18091	6.77535
ENSBTAG00000019071	COMMD10	0	0	0	1	3.86767	3.79997	4.00005	3.98248	4.3276	4.36514	3.1519	3.30025	4.43363	4.53068	3.72582	3.76333	3.90805	3.88263	3.95222	3.99971
ENSBTAG00000019078	UCN2	0	1	0	0	4.85634	4.96229	0.267165	1.08561	1.34581	1.26774	0.22006	0.155247	0.421225	0.356413	1.34043	1.30302	7.21982	5.68565	2.95459	1.76892
ENSBTAG00000019084	INHBC	1	1	0	0	1.08451	0.10045	2.28247	4.47131	1.64562	0.35257	14.6221	14.4239	3.18471	3.24824	0.531883	2.52342	3.21551	2.55863	3.91653	3.81717
ENSBTAG00000019131	TNRC4	1	1	0	0	3.54629	2.80888	2.80795	1.36192	12.3751	12.3442	2.89674	1.43176	4.47662	4.41011	1.90116	3.62738	13.0548	13.0928	2.78266	0.647952
ENSBTAG00000019140	SPINK5	0	1	0	0	4.249	4.13597	1.96983	1.54164	5.14382	5.38188	0.0895275	0.07967	1.08558	0.53548	8.42439	8.66592	5.09226	5.45674	1.60305	1.69212
ENSBTAG00000019145	MOS	0	1	0	1	0.0680967	0.02245	0.292585	0.237412	0.09669	0.0415175	0.661805	0.606633	0.86297	0.807798	7.40951	6.37563	0.184522	0.123833	0.116695	0.0615225
ENSBTAG00000019147	RPS20	0	0	0	1	20.5157	19.6788	20.5739	20.4753	18.0402	18.029	19.1956	19.1669	19.2661	19.1215	21.2224	20.8122	19.8344	19.7196	21.3127	20.9194
ENSBTAG00000019152	NYAP2	1	0	0	0	5.39557	5.29923	2.38646	0.55683	10.2046	10.1096	0.21178	0.11111	0.412945	0.312275	4.94368	3.87619	9.30808	9.37775	2.26813	2.932
ENSBTAG00000019159	PVALB	1	0	0	0	6.32327	4.51765	11.1305	10.5404	12.5472	12.7896	0.887698	0.753319	7.3196	8.62807	8.00944	7.01863	5.61856	5.52565	7.7531	6.92992
ENSBTAG00000019168	PHOX2A	1	0	1	0	3.6017	0.841758	6.48224	6.66271	1.39455	2.20467	4.87015	5.40797	1.73628	1.75315	3.773	2.74	0.154457	0.81433	4.38307	4.95317
ENSBTAG00000019179	TSKS	0	1	0	0	5.36804	5.91134	8.39429	8.27814	3.74126	5.11504	2.26993	3.22633	1.79683	1.12059	1.72981	2.6616	2.3535	0.730875	2.86559	2.05513
ENSBTAG00000019192	LHX8	0	1	1	0	2.37445	0.523855	8.84123	7.9572	7.08367	6.94014	0.712364	1.07595	3.02406	3.20567	6.79765	6.04077	1.12654	0.13731	0.781475	0.02652
ENSBTAG00000019200	BPIFB2	1	0	0	0	3.63672	1.10845	1.21746	0.489027	4.26584	4.61772	0.791794	0.603603	1.87712	1.088	0.199399	0.0112075	1.98289	0.576588	0.246689	0.0584975
ENSBTAG00000019242	CHRNB1	0	1	0	0	1.2176	1.15935	1.19227	1.19241	0.771831	0.653594	0.505444	0.375373	4.4475	4.48347	1.17454	1.15625	1.7062	1.61597	1.098	1.09697
ENSBTAG00000019249	HS3ST6	1	0	0	0	5.96748	5.63196	8.74878	8.63062	2.61843	1.02757	5.17622	2.97511	5.68815	5.1666	5.43849	4.75777	5.03576	4.19017	7.16371	7.58688
ENSBTAG00000019254	C9orf171	1	1	0	0	9.47806	9.50461	0.866842	0.815114	5.86202	7.17248	0.559397	2.05062	0.357773	0.994443	3.64755	2.59905	1.52418	2.0785	7.4975	3.67183
ENSBTAG00000019260	GLIPR1L2	1	0	0	0	4.84913	0.736905	6.96524	6.62836	6.89217	6.31854	3.40514	1.54523	1.46927	0.208529	4.95304	2.93454	6.03591	4.51591	5.23771	3.14218
ENSBTAG00000019287	FAM81B	1	1	0	0	11.0973	11.0496	2.4308	1.39157	3.95964	5.60938	0.620792	1.10293	1.68832	1.58687	4.65339	1.76038	1.30372	0.0688638	9.9181	7.82132
ENSBTAG00000019293	EGR3	1	0	1	0	7.95918	6.87826	8.7996	8.6376	8.59677	7.28006	4.48697	3.30876	7.93892	7.36562	8.50574	8.25206	8.35432	7.67862	6.91545	6.14105
ENSBTAG00000019312	TFCP2	0	0	1	0	4.04345	3.80374	3.71629	3.6056	3.59942	3.55094	2.8743	2.74318	3.08082	3.09948	3.83554	3.81561	4.32405	4.28404	4.19495	4.07435
ENSBTAG00000019327	NRAP	0	1	0	0	2.68198	2.89661	2.61742	2.25904	1.04198	2.0225	2.21573	2.33565	12.9667	12.92	2.98843	2.98067	4.89591	5.20691	2.72266	2.642
ENSBTAG00000019337	ACVR1C	0	1	0	0	1.64697	3.44396	8.44536	8.81188	4.61902	4.53013	4.54934	4.40132	2.44519	1.57864	0.771815	1.50773	3.34283	3.86708	1.42101	1.42746
ENSBTAG00000019354	PAX8	0	0	1	0	6.50784	6.53924	0.833376	0.760635	4.53447	4.87869	3.94928	3.68425	1.78958	1.80562	3.97472	3.58516	4.82388	5.00853	5.61784	4.7473
ENSBTAG00000019355	KCNK10	0	1	0	0	2.81395	2.05896	0.529826	1.21399	8.96921	9.04307	0.594441	0.632367	1.05835	1.6537	1.16278	1.2136	0.120635	0.142118	0.0493312	0.0872575
ENSBTAG00000019379	TUSC5	1	1	0	0	5.61508	2.40737	16.4545	16.0497	5.73617	4.94333	4.53421	4.0598	10.1935	8.86081	6.41965	5.77406	5.98003	4.73773	4.95302	3.95599
ENSBTAG00000019426	RNF175	1	0	0	0	8.20305	7.31778	1.6229	1.53081	11.6051	11.7609	3.28001	3.54166	0.0637288	1.38062	4.76915	5.37306	8.98668	9.12437	9.02626	8.8633
ENSBTAG00000019440	PROZ	1	0	0	0	8.60983	8.44144	6.98689	7.64022	6.89676	6.70192	13.9262	13.9163	4.37106	4.28874	7.98156	7.94337	3.14352	1.56396	8.86607	8.92371
ENSBTAG00000019447	NPVF	1	1	0	0	2.95554	5.0482	0.191842	0.206464	5.27216	8.24816	1.68835	0.936807	2.98152	1.48781	10.2406	9.86511	1.55327	0.482394	1.17196	0.400904
ENSBTAG00000019448	CLDN7	1	0	0	0	12.8729	14.469	6.32753	6.75088	3.26565	5.10932	12.419	12.549	4.66317	5.22659	6.93033	6.39657	11.3075	11.2749	11.5729	11.7322
ENSBTAG00000019506	ODF3L1	1	0	0	0	4.61954	5.24963	2.16968	2.8584	0.177124	0.109579	1.71432	0.986096	5.15013	6.01864	3.66258	3.9301	1.54284	0.572309	3.66549	1.24067
ENSBTAG00000019521	COX6A2	1	1	0	0	1.91853	3.07933	6.49414	5.32518	1.98526	2.09728	4.06457	5.81707	16.6646	16.593	6.00689	5.63836	5.51767	4.50078	2.51764	4.01061
ENSBTAG00000019526	CMTM6	0	0	0	1	6.53554	7.02518	7.00456	6.90743	5.37956	5.44842	7.07025	7.04832	5.24261	5.20181	6.58159	6.56265	6.43292	6.47011	6.46815	6.69954
ENSBTAG00000019529	ATP8A2	0	0	0	1	8.43756	8.75384	1.46179	1.64032	10.6082	10.9662	5.14238	5.42466	1.12449	2.97002	8.92264	8.70394	9.41406	9.50569	8.14884	8.13825
ENSBTAG00000019540	CRNN	1	1	0	0	0.04504	0.0272967	0.25581	0.251591	0.44241	1.24967	0.89517	1.46407	0.826195	0.821976	1.45229	1.93197	8.20552	5.81093	0.079925	0.0757063
ENSBTAG00000019554	FBP2	1	1	0	0	7.43758	8.74148	8.58149	8.7991	1.17076	4.45295	7.26023	7.62271	16.5913	16.9128	6.35837	5.74403	6.09842	6.26073	7.18657	7.4333
ENSBTAG00000019580	TCL1A	1	1	0	0	1.24186	3.94204	0.627387	1.65154	0.0435175	0.244553	0.608633	0.809667	0.809797	1.01083	5.31004	5.25991	0.108773	0.315367	0.523142	1.69929
ENSBTAG00000019587	PI15	0	1	0	0	13.7157	12.9144	10.869	10.314	4.83382	5.39328	5.76975	5.35542	8.39638	8.09997	12.3988	11.884	6.62151	6.88771	14.0916	14.0558
ENSBTAG00000019616	APCS	1	1	0	0	4.09782	4.32791	4.32458	7.36356	1.90932	2.70278	17.1916	17.5312	6.67581	5.53984	3.36892	5.49289	5.10121	3.53573	6.18663	6.3888
ENSBTAG00000019676	MC4R	1	0	0	0	8.27311	5.50742	2.43642	2.93681	8.31552	9.28907	0.980924	0.129087	1.15997	0.323167	2.65996	2.78981	1.51786	1.89235	8.38779	3.18067
ENSBTAG00000019679	SYNE4	0	1	0	0	5.86018	6.69227	1.92993	2.14647	1.58222	1.47891	1.22984	1.37588	0.802995	0.321771	1.76305	1.44327	4.84777	4.77196	4.55403	3.96107
ENSBTAG00000019683	LYPD6B	1	1	0	0	10.0494	9.1999	1.70683	3.99664	9.36356	9.15317	4.33572	4.64491	1.69498	0.0749937	5.65888	3.67801	10.8766	10.5444	11.1704	11.128
ENSBTAG00000019698	TMCO2	1	0	0	0	7.06287	6.80049	6.96327	6.6768	6.02954	5.29054	4.24316	2.29891	5.94525	5.39733	6.83194	6.47926	6.87149	6.51835	6.97546	6.76315
ENSBTAG00000019704	HLTF	0	0	1	0	2.64964	2.32296	2.84492	2.92416	2.53256	2.53975	2.49817	2.5332	0.44676	0.630083	3.48043	3.5786	4.01143	4.00822	2.81106	2.44872
ENSBTAG00000019707	GATA2	0	0	1	0	6.73811	7.15024	4.24022	4.58852	2.57761	2.60597	0.504431	0.81947	3.25238	3.31415	3.46655	3.53276	3.71865	4.09699	6.61739	6.84597
ENSBTAG00000019716	IL8	1	0	0	0	3.52468	1.16336	5.76645	5.70074	3.01055	1.39907	6.62811	6.02878	3.66656	4.27093	4.22958	3.74559	7.64633	7.40151	1.631	3.17368
ENSBTAG00000019719	OPRM1	0	1	0	0	0.0306433	0.0826567	1.08604	0.547061	10.8873	11.0534	0.612006	0.646141	0.813171	0.847306	0.573116	1.78156	9.28462	9.06991	0.0669012	0.101036
ENSBTAG00000019732	GLRA3	0	1	0	0	0.0504383	0.0729367	2.63536	2.88811	9.18061	9.35123	0.901216	1.55651	0.819141	0.873517	0.0255812	0.0799575	0.137658	0.183567	0.0728712	0.127248
ENSBTAG00000019772	OXTR	0	1	0	0	12.2829	9.57805	3.87299	3.21841	7.57444	7.42341	1.88749	2.40034	6.38788	6.02581	7.7954	7.22765	0.821462	1.87666	12.4122	12.1841
ENSBTAG00000019793	RGS22	0	0	0	1	11.0293	10.2114	3.90662	3.3661	7.50596	8.02138	1.28998	1.9163	2.54641	1.58791	9.43493	8.44218	2.99727	2.81657	10.6193	8.80906
ENSBTAG00000019795	FBXO43	1	0	0	0	4.83881	2.41552	4.11153	3.71924	0.379994	0.0514187	0.945109	0.616534	2.15403	1.81514	6.43521	6.24151	3.22574	1.67035	6.20815	2.63317
ENSBTAG00000019796	FAIM3	1	0	0	0	5.30262	4.53238	3.91638	3.52986	5.22589	5.73279	8.28417	7.89308	1.69198	2.41702	4.48834	3.71853	2.2897	4.03145	5.21101	5.27973
ENSBTAG00000019808	FAM190A	0	0	0	1	3.45399	4.24578	2.38173	2.60401	2.14794	2.34082	3.37118	3.37573	0.527844	0.645026	2.32302	2.54499	3.91412	3.84527	3.18145	3.3852
ENSBTAG00000019811	HAO1	1	0	0	0	5.03191	3.41939	2.54408	5.28071	2.5197	2.49673	14.0944	14.3093	2.51483	2.09333	1.41192	3.19727	2.34996	1.5162	3.61711	3.59889
ENSBTAG00000019813	ADIPOQ	1	1	0	0	9.50556	6.23529	20.199	20.121	10.7082	10.8265	8.59816	7.77355	14.1542	13.0488	10.2003	9.83512	9.81011	9.23736	9.78316	9.87146
ENSBTAG00000019823	ADAMTS17	0	0	0	1	3.26261	3.18195	2.12162	1.79341	1.96019	1.88083	1.31365	1.53916	1.25517	1.02558	5.31295	5.51371	0.728492	0.703444	3.42709	3.72737
ENSBTAG00000019876	DSC1	1	0	0	0	5.97491	6.25031	9.0305	7.07404	0.880571	1.36579	5.81195	5.00678	0.365487	0.494351	3.01714	1.37105	5.17654	4.69361	5.80916	4.04031
ENSBTAG00000019890	ATP6V1G3	1	0	0	0	10.2854	5.11381	1.44174	2.7841	0.821366	1.26315	1.39375	1.85095	1.18657	0.77743	6.77212	5.29846	0.522275	0.13554	9.25973	2.85647
ENSBTAG00000019901	RAD54L	0	0	0	1	3.67213	3.03756	1.61986	1.60537	1.59323	1.54224	1.33502	1.33955	0.831183	0.464575	3.91173	3.77573	2.16361	2.15818	3.77204	2.92006
ENSBTAG00000019912	CNTD1	1	0	0	0	4.35617	4.6961	6.60184	6.37777	5.69491	5.48869	4.65222	3.07559	2.65462	0.705041	2.9109	2.12291	3.74231	2.67381	3.4653	3.94354
ENSBTAG00000019927	CYB5R1	0	0	0	1	2.94896	2.89799	3.76551	3.81666	2.57594	2.83427	2.2471	2.23999	6.0382	6.02155	3.41213	3.35847	3.64229	3.59469	3.10299	3.3993
ENSBTAG00000019942	PABPC5	1	0	0	0	8.07211	7.97818	7.09676	7.35571	8.46074	8.77117	1.39629	3.23977	5.70829	5.99529	8.32028	8.57894	9.50096	9.6899	8.55003	8.75005
ENSBTAG00000019946	USP44	1	0	0	0	5.24548	6.52404	1.09557	0.112371	7.71473	7.22326	0.75762	2.47804	2.99939	2.48562	5.92964	6.0501	9.00402	9.07572	5.68727	5.69817
ENSBTAG00000019958	NXNL2	1	0	0	0	11.3428	13.3677	5.14381	5.07547	3.02184	4.82023	3.58909	4.75971	0.0621587	3.23223	9.39659	9.29556	7.60318	8.04456	10.1614	10.1216
ENSBTAG00000019961	ATP4B	1	1	0	0	5.03421	4.35472	2.07388	2.86015	3.2406	1.26799	6.35427	4.90982	1.85942	0.159686	10.5876	10.3539	1.53087	2.75382	2.84521	1.13449
ENSBTAG00000019997	TRHR	0	1	0	0	0.224193	1.11045	3.00922	1.67948	8.00516	8.66538	2.92583	2.3156	5.30459	3.65573	5.78087	6.96036	13.3431	13.3583	1.43332	1.28982
ENSBTAG00000020009	CCDC81	1	0	0	0	8.71493	8.51019	5.33218	5.26559	6.48916	6.17584	0.90433	0.115641	3.56561	3.02961	5.56912	3.17305	5.6363	5.05892	8.26419	6.78552
ENSBTAG00000020027	NHLH1	1	0	1	0	7.14157	7.41884	6.83766	7.68193	8.52639	8.9334	1.82213	1.17001	3.07148	4.20494	1.22132	2.94984	4.65681	6.39111	6.44438	6.74775
ENSBTAG00000020034	LYN	0	0	0	1	1.61263	1.70586	2.90123	3.02934	1.6569	1.94678	3.32582	3.35596	0.727575	0.718294	1.58137	1.73329	0.767832	0.788183	1.24626	1.2954
ENSBTAG00000020051	C25H16orf82	0	1	0	0	0.0224767	0.0682817	0.24889	0.282109	6.4902	7.09552	0.61811	0.651329	0.819275	0.852494	0.025715	0.0589338	0.136692	0.161339	0.073005	0.106224
ENSBTAG00000020053	ZEB1	0	0	1	0	2.7665	1.72058	3.18856	3.10864	4.14364	4.22895	1.55296	1.50722	3.01259	3.00835	3.0324	2.89605	2.79961	2.68089	3.44028	3.44957
ENSBTAG00000020072	CATHL4	1	1	0	0	0.0322717	0.167615	1.66226	1.73328	0.0962362	0.1531	2.16816	2.18363	0.862516	0.91938	1.26876	0.510175	1.33687	3.54174	0.116241	0.173105
ENSBTAG00000020076	CATHL5	1	0	0	0	5.11335	3.49057	3.38732	7.96259	6.65568	7.47246	4.54681	5.17769	0.204769	0.613009	8.61701	9.35604	5.04637	6.74396	2.10276	4.87331
ENSBTAG00000020080	MYBPC2	0	1	0	0	1.2163	1.75603	1.66293	0.961935	1.13488	1.66086	1.80559	1.89105	12.1433	12.2326	2.03249	1.67088	2.09	2.12342	1.14395	0.995693
ENSBTAG00000020095	MS4A3	1	0	0	0	2.00037	0.676632	1.04649	2.43932	1.3914	0.486738	6.53658	4.9232	0.927909	0.859058	0.447909	1.0443	0.258622	0.172268	0.181639	0.112787
ENSBTAG00000020096	MS4A2	1	0	0	0	5.54869	2.99079	9.21521	9.43113	2.57386	0.752829	2.40087	2.90765	6.24988	6.35823	6.79472	6.60321	0.22276	0.0630088	7.00074	6.55647
ENSBTAG00000020099	STMN2	1	0	0	0	10.7641	8.75428	3.95778	3.93206	15.4076	15.4421	6.44194	5.67458	6.1523	6.46909	6.22262	6.1842	9.56387	9.54008	9.21764	6.0937
ENSBTAG00000020102	EPHA8	1	0	0	0	6.15146	7.05747	0.078545	0.182575	9.94777	9.95398	0.7179	1.39505	0.648925	0.752955	1.91911	3.75892	9.28164	9.38575	3.90958	2.92563
ENSBTAG00000020105	AQP7	0	1	0	0	2.32827	1.09127	11.7559	11.6753	3.35455	3.42894	1.64373	1.50543	9.06251	8.85435	2.21925	2.35671	1.45018	1.74656	1.69586	1.70515
ENSBTAG00000020140	CER1	0	1	0	0	2.13125	2.10183	0.689932	1.4481	0.189438	0.301369	0.754547	0.866479	2.4604	2.44524	6.03858	6.51235	4.47243	4.19508	2.32799	3.94268
ENSBTAG00000020169	CEPT1	0	0	0	1	2.96578	2.99553	3.35356	3.26915	3.35555	3.33889	4.04101	3.98733	1.86723	1.80417	2.9583	2.94248	3.5929	3.50732	2.94362	2.80248
ENSBTAG00000020184	AQP8	1	0	0	0	2.39466	2.90615	3.32481	5.76982	1.71501	2.35198	15.1885	15.3022	4.37434	2.7498	6.51701	5.82928	3.81827	2.42653	3.84982	4.1998
ENSBTAG00000020190	KREMEN2	1	0	0	0	1.59693	5.81383	7.48846	7.35483	7.76116	7.78106	2.28573	1.80575	3.57802	3.27397	0.0521775	0.875355	5.41695	4.27548	1.76403	3.21101
ENSBTAG00000020191	FEV	1	0	1	0	0.142968	0.0546967	0.68362	1.24904	6.43062	4.67414	4.80662	3.83715	0.938345	0.834075	0.144785	0.040515	0.275105	0.14764	0.192075	0.087805
ENSBTAG00000020195	ANKRD34C	0	1	0	0	1.20617	0.470175	0.231114	0.31698	10.029	10.2732	0.600329	0.686195	0.801494	0.88736	0.248764	0.845562	5.81261	7.48057	0.0552238	0.14109
ENSBTAG00000020198	METRN	1	0	0	0	9.45507	9.09418	5.12489	4.68077	12.0031	12.0082	2.97668	1.34263	7.10673	7.06603	9.26942	8.91023	10.198	9.91105	10.2356	10.0098
ENSBTAG00000020201	S100Z	1	0	0	0	2.56589	2.85577	3.05696	5.56175	0.0869175	0.2066	0.652033	0.771715	0.853198	0.97288	6.47993	4.63033	0.594305	1.64671	0.521968	1.5222
ENSBTAG00000020213	NIPAL4	1	0	0	0	5.53374	4.42649	9.12491	9.09023	9.49567	9.79416	3.03669	1.43449	6.41258	6.54109	7.00362	6.82513	4.68757	4.33197	7.27074	7.7695
ENSBTAG00000020219	ZMYND17	0	1	0	0	1.99494	1.70558	1.72566	1.71527	0.799057	0.5138	0.552063	0.506601	5.85752	5.82396	1.6295	1.59902	1.63436	1.58903	2.04526	2.04164
ENSBTAG00000020223	CASQ1	0	1	0	0	1.7461	1.93557	2.97062	2.80354	1.50794	2.07361	1.28962	1.38761	12.1317	12.0588	3.86329	3.8733	1.56285	1.71681	1.85584	2.04632
ENSBTAG00000020236	NECAB2	0	0	0	1	2.26309	2.53098	1.60146	1.57801	5.32979	5.5475	4.74343	4.90062	0.417033	0.76732	2.1341	2.42114	2.86994	2.95012	1.80019	2.35913
ENSBTAG00000020242	CRLF2	1	0	0	0	1.67562	2.37384	7.27042	7.33549	0.0749337	1.66219	3.4547	1.83366	5.16741	5.377	3.74015	3.7935	1.14637	1.03358	1.76457	0.97976
ENSBTAG00000020261	CDH26	1	0	0	0	4.23959	0.981538	4.96533	5.19915	7.44679	7.46667	0.240735	0.151813	5.21927	5.95083	4.00701	5.05577	5.99988	3.90954	1.98456	1.86784
ENSBTAG00000020263	TIMP4	0	1	0	0	2.41218	2.5487	8.56739	8.63668	1.80644	1.75845	0.668974	0.452675	5.0115	4.78346	2.74657	2.38138	1.7725	1.91908	2.06799	2.07132
ENSBTAG00000020270	NFKB1	0	0	1	0	3.20866	3.06048	3.54966	3.38565	1.96119	1.93199	2.86765	2.76815	2.71551	2.70215	3.09412	3.04359	2.72908	2.61176	3.32836	3.50624
ENSBTAG00000020285	PRG3	1	0	0	0	1.16781	3.75322	1.27589	0.801909	0.107916	0.294609	2.0246	2.17105	1.89578	1.38816	0.419701	1.32576	0.603108	1.64706	2.29477	3.9759
ENSBTAG00000020299	OPN1LW	1	1	0	0	1.48956	0.488478	3.21212	1.21301	0.496326	1.22817	0.697916	0.658517	6.04507	5.94773	0.105526	0.0661275	0.19266	0.195038	0.744611	1.96076
ENSBTAG00000020302	FEZF2	1	0	0	0	1.14966	0.361573	0.155745	0.222895	7.86842	9.22026	0.524965	0.592115	1.75309	1.81049	2.17849	2.48639	5.83793	5.48402	0.238645	0.854835
ENSBTAG00000020348	ASTL	1	0	0	0	2.95391	1.62716	1.1678	0.0464575	6.1604	6.2843	3.84263	2.12917	0.963002	1.21507	7.93112	6.63628	5.53358	4.0365	4.87162	1.11344
ENSBTAG00000020353	PFN3	1	0	0	0	4.75608	6.00993	4.45425	4.43503	3.14099	1.36827	10.443	10.5531	0.893537	0.147503	1.15718	2.66479	3.28172	2.52026	2.6308	3.75264
ENSBTAG00000020355	KLF4	0	0	1	0	3.46921	3.51157	6.63832	6.19098	1.62048	1.49246	0.56367	0.540148	5.61039	5.08902	3.03338	2.74492	2.25711	1.92779	2.85763	2.92384
ENSBTAG00000020363	GBA3	1	0	0	0	6.64272	5.50494	3.57338	6.11886	2.24058	0.626312	15.2832	14.9055	4.20105	2.84533	3.88218	3.5328	3.73099	1.44853	6.77129	4.5899
ENSBTAG00000020389	TPP2	0	0	0	1	2.73142	2.56646	2.97817	3.04629	2.51554	2.56804	4.25281	4.21914	4.53469	4.6073	3.11996	3.08255	2.4344	2.51358	2.82985	2.69551
ENSBTAG00000020391	MEP1B	1	0	0	0	9.6254	11.8951	3.85981	4.7694	4.88808	4.65269	11.3625	11.5273	2.24872	0.704571	6.12573	6.25823	5.27282	5.15108	7.90367	7.39199
ENSBTAG00000020393	METTL21C	0	1	0	0	2.51352	1.59028	3.66208	3.49103	2.19145	2.95325	1.77748	1.35269	12.0942	12.3785	2.22047	3.40146	1.09492	1.83138	2.19714	3.39478
ENSBTAG00000020402	TDRD9	1	0	0	0	5.85505	8.68261	2.89443	3.33722	4.99171	5.20575	2.79448	3.02185	1.17951	2.39599	4.41367	4.03369	2.51087	3.34397	5.14312	8.85025
ENSBTAG00000020404	FTCD	1	0	0	0	3.15273	2.93304	3.92903	6.30596	2.56376	1.8921	15.7057	15.5624	5.11304	4.10704	4.58685	5.05201	3.66654	1.84915	5.2314	4.75021
ENSBTAG00000020409	C1H21ORF56	1	0	0	0	0.077335	1.93017	2.90369	4.93756	5.16127	5.82028	7.8626	7.93817	5.12319	3.96993	5.58182	5.63393	2.98668	3.74263	1.95141	1.88335
ENSBTAG00000020415	KLK4	1	0	0	0	9.57191	9.69227	5.45988	5.15619	7.84093	7.82852	4.22116	5.21739	3.58012	1.23702	8.56438	7.94498	5.08775	4.47804	8.85571	8.681
ENSBTAG00000020434	C18H19orf12	0	0	0	1	1.6907	1.44672	5.09376	4.93565	2.78531	2.90187	0.871686	0.718279	2.36032	2.15873	2.28747	2.2163	2.35301	2.29221	1.80766	1.70116
ENSBTAG00000020448	ZNF282	0	0	1	0	1.96514	1.89437	1.14873	1.15432	0.951265	0.82432	0.953723	0.901515	1.12757	1.26413	1.89995	1.78098	1.5064	1.5482	1.88594	1.73823
ENSBTAG00000020453	CLEC5A	1	0	0	0	6.76439	7.52386	6.39827	7.82477	2.16371	3.59277	6.76999	7.1837	1.9447	5.29707	6.24011	7.04441	7.26574	7.61057	6.10561	7.12505
ENSBTAG00000020454	PROSAPIP1	0	0	0	1	2.47449	2.26502	2.26592	2.03048	3.29383	3.17971	1.85358	1.69637	3.34462	3.30525	2.24358	2.05088	2.63272	2.43006	2.69246	2.29724
ENSBTAG00000020460	DPPA2	1	1	0	0	2.23518	7.25216	1.35134	0.905687	0.0970162	0.370727	1.6055	1.23805	0.863291	1.137	0.0697312	0.343442	0.154897	0.437598	1.36778	4.29507
ENSBTAG00000020466	CNTN5	1	1	0	0	6.93438	1.99553	0.281757	0.0487537	10.8643	10.9511	1.80698	0.788299	1.99056	0.983829	2.19573	2.70174	6.38388	7.42116	10.3357	8.88531
ENSBTAG00000020474	NOXRED1	1	0	0	0	4.44495	3.13091	4.00393	4.45652	4.80372	3.98964	0.763588	2.42077	1.24863	3.57095	3.43049	4.75558	5.78092	5.37477	5.29703	4.64044
ENSBTAG00000020494	RPE65	0	1	0	0	0.136265	0.0476217	0.338449	0.275324	5.69424	4.41128	0.707664	0.644539	0.908829	0.845704	0.356099	0.803907	4.03351	3.55336	1.15505	1.00905
ENSBTAG00000020499	PLA2G2D1	1	0	0	0	6.58681	6.84472	8.15874	8.93495	0.899486	3.30377	11.8281	11.6727	5.75157	5.51521	9.04431	9.46573	7.25885	7.19229	6.22164	5.52144
ENSBTAG00000020524	UPK3BL	1	1	0	0	12.4648	11.4124	2.05163	0.767651	2.57552	2.12454	3.96212	2.64063	4.59701	3.23909	8.46361	5.66744	12.4034	11.7548	9.55855	5.12555
ENSBTAG00000020543	UPK1A	1	0	0	0	6.39575	6.77767	5.30162	5.72358	4.10736	3.42533	4.81769	5.21385	1.63652	3.60051	4.07236	4.59957	4.39324	5.07458	5.29042	6.00551
ENSBTAG00000020555	DEFB123	1	0	0	0	3.06626	4.46653	0.323628	0.516594	2.55956	3.66498	0.692848	0.885814	2.19753	1.50456	0.100453	0.293419	1.18651	3.17648	0.567788	1.65191
ENSBTAG00000020556	APOC4	1	1	0	0	1.75077	4.06187	4.31996	6.75861	4.09281	5.44297	16.2898	16.4047	5.56942	4.50932	2.19233	4.65642	4.20334	1.38679	5.71875	5.50688
ENSBTAG00000020558	APOC2	1	0	0	0	3.35089	2.71399	3.45745	6.40736	10.6414	11.0745	16.3699	16.3739	4.08631	2.80992	3.78972	5.64078	5.28752	3.5236	5.2504	4.3151
ENSBTAG00000020580	TCN1	1	0	0	0	3.3663	3.42675	6.00253	6.08985	3.92979	2.86955	6.71516	6.88907	4.88271	5.099	2.59702	2.51271	4.12211	4.73839	1.01582	3.29534
ENSBTAG00000020582	PRSS22	1	0	0	0	9.30578	10.261	3.18565	2.66428	0.759904	1.45372	3.04263	4.18382	0.164524	0.815201	4.39552	2.48291	4.23446	3.84301	7.7714	7.23147
ENSBTAG00000020592	OTOS	0	1	0	0	1.87586	1.93057	0.051475	0.998185	13.3123	13.3866	2.36961	3.4189	0.646545	1.64564	14.3384	14.499	12.8495	12.8254	2.86603	2.97848
ENSBTAG00000020597	FMO3	1	0	0	0	4.09157	5.74663	6.30092	8.13134	6.35713	6.78708	16.5177	16.6926	7.02538	6.66398	3.71951	5.54181	5.69826	4.49727	6.26842	6.13072
ENSBTAG00000020605	SMTNL2	0	1	0	0	3.63688	4.15621	0.947111	0.752606	3.98896	4.15048	0.760995	0.649594	8.69254	8.64346	3.42428	2.97589	2.56562	2.41431	3.30169	2.86626
ENSBTAG00000020615	CCDC105	0	1	0	0	0.07586	0.134	0.306304	0.345131	5.87036	6.56786	0.675524	0.714351	0.876689	0.915516	0.0831288	0.121956	0.204898	0.216016	0.130419	0.169246
ENSBTAG00000020643	BARX2	1	0	1	0	11.8256	11.861	2.77929	1.26449	1.39073	3.66948	10.1836	10.135	9.1169	8.54169	6.40315	4.4303	6.67043	6.3806	9.19274	5.0974
ENSBTAG00000020650	ADCYAP1	1	0	0	0	1.57732	1.12882	4.91714	5.84329	11.6124	12.6527	0.938638	1.83094	0.709669	2.79525	4.07764	4.73403	1.18071	2.70836	3.58841	4.7841
ENSBTAG00000020672	NEU2	1	0	0	0	0.0724233	0.157098	0.3073	0.36404	1.68397	1.55027	5.17281	6.74202	0.87768	0.934421	1.05621	0.45227	2.01745	1.63399	0.436015	1.13899
ENSBTAG00000020701	MEF2C	0	0	1	0	1.33156	0.480146	2.0972	2.25122	1.86495	1.92505	0.219335	0.240788	5.36497	5.29204	2.40066	2.38393	0.96599	0.913473	1.7091	1.55705
ENSBTAG00000020705	PRSS12	1	0	0	0	6.89395	6.53884	4.11962	2.50525	5.84143	5.89204	2.90246	2.10091	2.6168	3.01583	9.11147	9.06241	6.7394	6.74043	5.90421	5.34081
ENSBTAG00000020751	HSF1	0	0	1	0	5.18166	5.16469	6.00807	5.76718	5.2413	5.38205	4.99364	4.89209	7.31588	7.33525	5.67533	5.50172	4.95422	4.97875	5.28904	5.15437
ENSBTAG00000020767	SH2D1B	1	0	0	0	7.03008	6.33403	4.94725	6.20754	2.13791	2.24638	7.24192	7.2381	1.38859	2.59297	3.90532	4.01988	1.37186	3.03678	6.57551	5.29994
ENSBTAG00000020769	OPCML	1	0	0	0	4.29865	6.50501	3.28823	2.24544	12.0634	12.3103	0.0609288	1.45911	5.66302	5.72161	6.98272	7.02591	8.39911	7.44205	6.74621	7.76242
ENSBTAG00000020782	CNOT1	0	0	1	0	5.90329	7.45397	5.11629	5.21334	4.13401	4.27743	5.2161	5.26863	5.28773	5.36237	5.19568	5.26143	5.07321	5.13101	5.50754	5.77605
ENSBTAG00000020798	C1orf94	1	0	0	0	1.52756	0.673722	0.372493	0.45545	6.66956	6.85716	0.741707	0.824665	5.98536	6.41213	0.149317	0.232275	2.9334	5.01531	0.196603	0.27956
ENSBTAG00000020809	SLC36A2	1	1	0	0	9.29222	10.0664	2.02556	0.463843	3.81299	3.39088	0.388804	0.190443	3.56933	1.34605	3.28219	1.37489	0.237643	0.606652	7.98046	8.41421
ENSBTAG00000020856	HFM1	1	1	0	0	9.19827	7.67071	4.55843	4.50215	1.94319	0.892373	1.05207	0.0547813	1.40998	2.0748	10.0374	9.77711	1.79921	1.55265	9.72084	9.16988
ENSBTAG00000020880	C10H14orf37	0	0	0	1	6.46829	6.03641	1.89119	1.63791	7.98006	8.10398	1.10307	0.909386	1.92513	1.66171	8.66151	8.5451	8.8363	8.68095	6.96095	6.58144
ENSBTAG00000020889	CA7	1	1	0	0	1.6437	2.49216	0.114705	0.719104	9.78387	9.8394	1.07519	0.43118	1.54719	1.50387	0.935756	1.09204	5.84211	3.96317	0.812686	0.743046
ENSBTAG00000020896	GRIFIN	0	1	0	0	0.664292	2.02296	2.07337	2.94481	9.47743	9.64601	0.991528	1.80243	0.855212	0.950129	0.0616575	0.156574	0.139695	0.280029	1.32279	0.592714
ENSBTAG00000020914	CPNE8	0	0	0	1	3.02025	2.99554	4.22977	4.20773	0.728659	0.522786	1.96731	1.83135	2.19524	1.87299	2.0225	1.8019	0.621589	0.668	2.58247	2.82209
ENSBTAG00000020918	NKX1-2	0	1	1	0	0.0384367	0.0914583	0.575389	1.19286	3.04377	1.94166	0.655499	0.659613	0.856664	0.860777	0.343254	0.941729	0.163227	0.177692	0.110394	0.114507
ENSBTAG00000020928	ADPRHL1	0	1	0	0	2.42872	1.98779	3.23617	2.52884	8.09627	8.41213	4.96687	5.27847	13.8901	13.7183	7.00423	6.47022	6.12817	5.87433	2.5443	1.76645
ENSBTAG00000020929	ARMC3	1	0	0	0	11.3157	11.1831	1.24151	0.594773	8.47043	9.25495	4.33942	2.67696	1.09401	0.26057	7.73977	6.19084	6.56391	6.38921	9.76385	7.81743
ENSBTAG00000020935	HIF1A	0	0	1	0	6.49069	7.1291	6.96702	6.78401	5.80582	5.89452	4.6723	4.67523	4.55483	4.53421	7.39964	7.53993	5.95928	5.86282	6.29819	6.15074
ENSBTAG00000020956	MPPED2	1	0	0	0	11.2105	11.6111	5.37578	5.67835	10.0735	10.0991	1.37699	3.09623	6.70605	7.2428	7.95296	8.04733	9.4916	9.56881	11.349	12.0178
ENSBTAG00000020965	ZMYND10	1	0	0	0	11.5681	11.2648	5.53709	5.0959	10.0957	10.469	5.01068	4.63213	4.24827	4.65203	7.76901	6.14897	9.58797	9.42646	10.4214	8.48874
ENSBTAG00000020980	CAT	0	0	0	1	10.3376	10.7428	12.9425	13.179	9.89921	10.0793	15.9179	15.9937	11.8309	11.9276	10.1744	10.2657	9.89347	9.9653	10.4096	10.6188
ENSBTAG00000020992	RHBDL3	1	0	0	0	6.03659	5.4372	6.02707	5.64697	8.23601	8.11532	2.62654	2.14741	3.3076	1.36751	6.30215	6.1954	7.2197	7.10688	6.31211	6.34846
ENSBTAG00000021003	GALR1	1	0	0	0	7.66022	6.81902	1.53273	1.97555	7.32285	7.73199	8.19216	8.45615	0.593561	3.60505	9.09858	9.1401	6.9172	7.00968	2.90497	1.34143
ENSBTAG00000021007	FOLR1	1	0	0	0	12.1085	13.2093	4.2394	5.56069	9.66819	8.08898	10.6108	11.2474	0.0431537	1.69116	3.36517	3.92624	3.80856	5.80009	11.8019	11.4748
ENSBTAG00000021008	ZNF219	0	0	1	0	1.96891	2.05989	3.33636	3.37957	2.11456	2.22934	0.68008	0.532086	3.06479	3.16427	2.40998	2.30871	2.72476	2.75233	2.08452	2.15169
ENSBTAG00000021009	TRIM55	0	1	0	0	4.67493	3.19597	3.62997	2.44904	3.72535	4.14005	3.09703	3.10079	12.873	12.5422	3.61735	2.36665	0.127422	1.29311	5.25958	5.98729
ENSBTAG00000021015	FAM196A	1	0	0	0	3.31067	3.19024	3.06752	1.67387	6.94265	6.82081	0.221167	0.0461538	4.20218	2.22464	6.79699	6.71108	6.99998	6.60526	2.34434	2.08074
ENSBTAG00000021045	E2F3	0	0	1	0	1.05069	0.227877	1.51178	1.52287	1.06544	1.11011	1.20513	1.12835	1.98531	2.24042	2.05227	1.9966	1.29495	1.36117	1.59691	0.99464
ENSBTAG00000021050	ECEL1	1	0	0	0	2.95978	2.13296	0.64703	2.47119	11.9179	12.2617	10.0342	8.93103	2.69395	2.08566	3.88187	3.2883	4.76251	5.49215	2.72215	0.584554
ENSBTAG00000021057	TMEM190	1	0	0	0	10.2195	9.88742	1.80262	3.80312	5.12249	6.53827	6.2528	5.31861	0.02928	0.124973	10.5171	11.0661	9.74641	10.1662	9.67566	8.71126
ENSBTAG00000021059	BT.103569	1	1	0	0	11.9478	13.2201	5.68182	5.7328	5.40926	6.57032	0.842103	0.901722	7.61454	8.88382	3.2898	1.37532	5.05235	6.64769	10.0875	9.55352
ENSBTAG00000021077	BOLA-DQB	1	0	0	0	10.2925	11.1221	10.8912	11.4907	8.88441	9.9614	10.643	11.2033	9.42275	10.3023	9.16913	10.5579	11.1381	10.6741	10.207	11.1285
ENSBTAG00000021082	TMEM125	0	0	0	1	11.5098	12.0819	2.46122	0.818697	12.7054	12.8017	5.05377	4.12202	1.02894	0.630266	5.8177	5.4532	11.1032	11.0688	10.4923	9.94309
ENSBTAG00000021099	CLVS2	1	0	0	0	1.48082	1.30218	4.93289	3.56676	12.2311	12.4785	0.180536	0.137618	2.38393	2.84506	1.34427	2.23153	5.14936	6.22521	2.66431	0.562817
ENSBTAG00000021111	POU5F1	1	1	1	0	0.154795	0.0553983	0.386536	0.266813	0.190646	0.0709225	0.755756	0.636033	0.956921	0.837197	5.84884	3.62139	0.283117	0.155603	0.210651	0.0909275
ENSBTAG00000021118	CYP26	1	0	0	0	5.90208	12.3599	3.11379	3.10106	6.91842	7.34207	6.39872	7.67088	1.10378	2.90892	2.27727	2.81646	5.84165	6.35125	4.60708	5.58873
ENSBTAG00000021119	TDGF1	1	1	0	0	9.06081	14.9236	3.44492	2.60023	1.89309	5.30206	4.24953	5.90518	4.80199	4.81037	6.90417	7.00417	1.02423	5.03958	8.5512	13.2946
ENSBTAG00000021120	SMYD1	0	1	1	0	1.99561	2.38279	3.25252	1.79959	3.04253	3.24805	2.22754	1.94019	13.7066	13.5387	3.12121	2.05991	2.93964	3.32303	3.46775	2.53437
ENSBTAG00000021132	SYNPO2L	0	1	0	0	5.47809	5.19698	3.7689	3.94307	5.3951	5.88113	2.6053	1.97257	13.7942	13.8152	5.04185	5.20013	4.55446	4.83789	5.5958	5.43537
ENSBTAG00000021177	ADAMTS14	0	0	0	1	8.22847	7.35374	4.12804	4.58867	3.06288	2.29314	8.87811	9.11213	2.39434	3.35601	7.53588	7.40501	2.76216	3.41026	8.71892	8.34362
ENSBTAG00000021180	C28H10orf27	1	0	0	0	8.80873	6.93638	9.10556	9.42448	3.8674	5.77079	12.2627	12.0415	1.54807	1.29372	3.11251	1.21214	0.168298	1.3616	9.02665	5.37471
ENSBTAG00000021195	A1CF	1	0	0	0	2.3634	2.3824	3.31134	5.69499	0.957359	2.45962	14.177	14.2308	3.25537	2.00361	0.988659	1.39727	4.03247	2.37605	3.08944	2.99638
ENSBTAG00000021200	KISS1	1	0	0	0	1.51503	0.175218	3.80098	2.20394	2.40298	3.22452	2.73534	3.07017	1.73952	0.807698	1.32466	1.20423	0.29198	1.11297	1.09513	0.0940625
ENSBTAG00000021204	TES	0	1	0	0	6.63807	5.31056	4.8647	4.42736	0.422711	0.200644	1.45523	1.46908	3.00094	2.91038	3.31463	3.20486	4.99848	4.90336	7.99058	7.69698
ENSBTAG00000021216	HECW1	1	0	0	0	12.0182	13.3156	5.37941	5.16211	9.78617	10.0293	4.67162	4.9153	4.77032	4.87055	5.63195	5.05135	0.689873	2.48763	10.6178	10.2993
ENSBTAG00000021218	MYLPF	1	1	0	0	8.87747	11.2383	11.4704	9.63879	7.1113	9.95115	10.8265	11.0342	22.8914	22.9268	11.7829	11.0014	12.1627	12.3738	8.93113	8.97155
ENSBTAG00000021220	TMEM72	1	0	0	0	6.57759	6.41673	6.42687	7.89722	6.76287	8.91428	7.12443	7.51989	1.86998	2.07301	0.113126	1.22346	6.86223	7.28766	8.75029	8.93377
ENSBTAG00000021276	TFF3	1	1	0	0	13.2185	11.784	2.07295	2.63509	0.52748	0.986589	6.11606	5.74446	1.28195	1.71603	5.11431	2.47034	6.82208	4.43208	12.0257	10.1547
ENSBTAG00000021284	RSPH1	1	0	0	0	11.7338	11.2241	3.16672	2.01592	10.8117	10.9651	0.176643	2.14168	1.97949	1.82268	8.12469	7.41766	11.2864	11.2296	10.2289	7.64118
ENSBTAG00000021292	ANKFN1	1	0	0	0	9.13308	9.09925	2.59606	2.05824	9.16393	9.36162	0.233736	0.0316425	2.05022	2.23191	6.17263	4.56825	7.47463	7.49965	7.61673	4.39502
ENSBTAG00000021298	METTL11B	0	1	0	0	0.1446	0.0530483	2.57877	1.91349	0.48449	1.10945	0.717075	0.636555	12.5046	12.365	1.13473	0.36773	0.210297	0.183095	1.28364	0.447575
ENSBTAG00000021302	CHAD	1	0	0	0	7.33273	6.17109	5.55355	5.54972	6.05719	6.77537	0.833086	2.20414	2.63758	4.66018	5.51521	5.49137	3.80002	5.03602	7.19355	6.169
ENSBTAG00000021306	CHRDL2	0	1	0	0	11.6444	8.83085	1.64255	2.61471	10.253	10.5266	3.59901	4.26565	10.076	9.65869	8.22148	7.46499	5.81595	5.95957	13.4074	13.3334
ENSBTAG00000021307	BNIP3L	0	0	0	1	5.94549	5.86619	6.80196	6.86292	5.73174	5.80391	5.97508	6.00259	3.65907	3.6807	6.46245	6.33233	5.5674	5.59105	6.0402	6.19358
ENSBTAG00000021326	CCL20	1	0	0	0	5.61145	6.7551	0.931375	3.44162	2.03057	3.74252	6.70261	4.37886	0.320556	0.324791	3.68189	1.86695	1.4895	0.146651	1.4756	1.60201
ENSBTAG00000021327	WDR69	1	0	0	0	11.3606	10.8982	6.74397	5.50235	9.88061	10.0432	4.06362	3.96907	0.984089	0.0752025	6.52031	3.46252	6.7444	6.42828	10.2202	7.6397
ENSBTAG00000021328	SPHKAP	1	0	0	0	6.39439	7.72697	0.0491125	1.66603	11.0652	11.5906	0.142583	1.17448	1.67296	3.41905	2.93027	2.36378	6.50143	7.67419	7.47297	8.62023
ENSBTAG00000021339	SCN8A	0	0	0	1	3.30149	2.46959	2.34818	2.2941	8.66413	8.78386	0.873425	1.09576	1.03123	0.628911	3.82959	4.4015	8.30726	8.37227	3.83573	3.87873
ENSBTAG00000021361	SAMD3	1	0	0	0	5.01984	4.96859	5.21811	5.66122	2.1636	4.16996	6.50872	6.64455	0.645654	2.7089	6.40911	6.53571	3.97255	4.45798	5.08277	5.28421
ENSBTAG00000021365	CDHR3	1	1	0	0	10.3746	9.42123	3.0681	2.51437	2.32606	0.00598875	0.982121	0.587911	1.65921	0.313159	6.88309	5.68296	1.73652	0.50551	9.33783	7.29405
ENSBTAG00000021386	ANGPTL3	1	1	0	0	2.91601	2.98924	2.41749	4.34118	1.608	1.66593	15.9043	15.9525	4.2968	3.33413	0.908771	2.41067	3.48203	1.40935	4.21821	4.20521
ENSBTAG00000021390	TMEM89	1	0	0	0	7.80487	7.31402	7.22657	7.13351	6.3539	4.83568	5.31607	3.71237	3.21584	3.24937	6.19134	5.96915	1.55458	0.940159	7.80635	8.01163
ENSBTAG00000021407	CASP16	1	0	0	0	9.2314	10.3002	2.86773	1.39355	0.237169	2.02982	7.30283	7.32647	10.8738	11.1226	4.16169	3.75848	2.72599	1.17102	8.21452	7.03816
ENSBTAG00000021408	FMO1	1	0	0	0	5.61682	7.10058	5.96115	7.94568	3.81274	4.61149	16.7882	16.9253	5.98634	4.10685	5.68789	6.57455	6.94431	6.90134	6.90979	7.16079
ENSBTAG00000021426	CPLX3	0	1	0	0	1.58613	1.50342	0.9776	0.503759	9.86699	9.89213	0.892262	1.41558	1.65557	1.10861	2.40324	2.761	11.4363	11.5235	0.101472	0.103549
ENSBTAG00000021428	CNDP1	1	0	0	0	6.23213	6.32066	3.22247	3.31587	4.82376	3.89118	4.52793	4.0667	1.33133	0.0987038	5.31936	4.47996	4.52017	2.93118	4.31404	4.41948
ENSBTAG00000021432	TEDDM1	1	0	0	0	6.02035	5.85229	2.78967	2.74648	3.88201	1.72675	3.03873	3.08041	3.32712	3.47585	1.87401	2.89364	3.14867	2.89874	5.80254	5.06266
ENSBTAG00000021447	SIM2	0	1	1	0	0.0476117	0.0708667	1.46501	1.60296	7.03098	8.1333	0.632255	0.641763	9.23258	8.36997	0.27005	0.767919	1.28802	0.474197	0.08715	0.0966575
ENSBTAG00000021458	DLX6	1	1	1	0	12.3536	12.8777	1.76777	0.911715	7.84821	9.27772	0.0641362	1.57536	1.13773	1.83635	2.70732	2.48196	8.12113	8.16378	11.7275	11.0091
ENSBTAG00000021494	EN1	0	1	1	0	0.590737	1.41965	10.6309	10.6222	7.92393	7.66515	1.63279	0.937607	10.4583	10.3254	6.95057	5.6509	0.258508	0.177761	0.176519	0.100606
ENSBTAG00000021508	LMOD3	0	1	0	0	2.41399	4.58128	4.97844	4.90818	2.8637	3.98296	3.90644	4.11029	15.2068	15.3162	4.51174	4.39148	5.72024	5.78046	3.95228	3.19469
ENSBTAG00000021512	ZBTB7B	0	0	1	0	3.15688	4.21034	3.81059	3.95739	2.2043	2.19501	3.79396	3.77949	3.6053	3.8994	2.25401	2.3773	3.19657	3.26212	2.92033	3.17222
ENSBTAG00000021516	GSTA1	0	1	0	0	4.8703	4.61293	4.22278	5.26608	1.97365	1.71021	11.5786	11.5282	4.84112	4.60293	11.5793	11.7261	2.38376	1.87065	4.24867	2.52938
ENSBTAG00000021518	TMPRSS4	1	1	0	0	9.07489	8.03946	1.21872	1.18423	2.28989	1.55103	8.46967	8.27748	0.767197	0.526197	3.45461	1.61421	1.13706	0.140788	4.48081	2.87807
ENSBTAG00000021522	PLA2G10	0	1	0	0	13.6868	14.8198	6.76501	6.8814	4.05529	4.91875	6.63309	6.70099	3.75634	3.92211	6.19899	5.80871	4.34571	3.52048	13.2461	12.7559
ENSBTAG00000021525	RAB42	1	0	0	0	6.06189	6.12719	5.56755	5.82544	3.09599	4.93881	6.06214	6.0359	2.68202	4.55816	6.71827	6.5734	5.99332	6.48955	6.55577	6.30848
ENSBTAG00000021527	IGF1R	0	0	0	1	3.34401	4.1175	1.58447	1.64604	2.81463	2.926	0.188231	0.331777	1.49187	1.56417	3.96756	3.84298	2.84347	2.75309	3.14995	3.56414
ENSBTAG00000021531	PGPEP1L	0	1	0	0	3.9724	2.49838	1.25099	1.29648	3.13535	2.77602	0.160289	0.151663	11.8238	11.7335	2.34015	1.35376	3.99455	4.64829	3.71246	5.37101
ENSBTAG00000021557	FUT2	1	0	0	0	8.81319	10.346	0.915426	2.90743	1.73074	1.77523	6.90023	7.27574	2.31165	3.24716	3.59181	3.53436	5.59025	4.81326	7.47206	8.62625
ENSBTAG00000021565	PRSS2	1	0	0	0	2.43224	8.57895	5.19058	5.8668	1.89942	4.00731	3.27274	5.87629	3.03012	5.71213	5.13088	6.70418	3.21955	4.44429	4.0762	6.32601
ENSBTAG00000021566	PAX2	1	1	1	0	12.9942	14.4821	2.65568	2.3411	1.38521	3.59084	1.38874	2.50778	0.350589	2.25576	2.37243	1.19754	0.102387	2.7814	11.4921	11.6074
ENSBTAG00000021575	BRD7	0	0	0	1	6.49186	6.56242	6.39392	6.30064	5.65203	5.64864	5.80807	5.73439	6.78295	6.75828	6.29011	6.23491	5.86281	5.91218	6.44788	6.42342
ENSBTAG00000021582	NCAPG	0	1	0	0	1.94955	0.38713	0.815913	0.750624	2.31133	2.40788	0.39443	0.140254	1.07969	1.04834	4.52261	4.17655	1.53413	1.61985	2.78942	1.0106
ENSBTAG00000021588	SCG2	0	1	0	0	1.81647	2.20699	2.72722	1.74222	8.86814	9.32814	1.84808	2.18179	3.61749	3.24484	6.13735	7.16285	13.1284	12.896	2.28724	2.25263
ENSBTAG00000021590	OR52B2	1	0	0	0	3.47322	3.81455	1.53025	3.32191	0.0829562	1.84072	0.205371	1.02392	1.37466	1.56327	2.93519	1.70795	5.06655	5.89542	3.75256	4.17443
ENSBTAG00000021615	LGALS3	0	1	0	0	0.0920667	0.102297	1.30744	0.654946	0.446472	1.2287	9.56931	8.79861	1.19275	1.93254	0.797782	2.38323	1.59535	0.618266	0.115668	0.153621
ENSBTAG00000021643	EFCAB12	1	0	0	0	10.3668	10.1372	3.9904	2.15508	7.49224	8.16002	3.16796	2.20223	0.906552	0.680765	6.90702	5.86321	7.8906	8.01419	9.06518	7.22475
ENSBTAG00000021657	CACNG6	1	1	0	0	0.876173	3.83531	0.0917675	0.856045	7.17881	6.97988	1.03134	0.406805	13.8787	13.914	2.00645	1.62055	7.89493	7.55142	3.94326	2.6196
ENSBTAG00000021667	NKAIN2	0	1	0	0	1.73457	0.550728	0.172988	0.194189	14.3692	14.5614	2.3613	2.22283	4.11544	4.33786	2.94461	2.13584	2.68977	3.3965	2.16115	3.36568
ENSBTAG00000021692	TBR1	1	0	1	0	0.304358	1.0956	2.44018	1.84728	4.83363	7.29301	0.783248	1.36367	0.743583	0.813075	2.70869	1.74291	0.0616383	0.12257	2.18314	1.69852
ENSBTAG00000021693	RPP25	1	0	0	0	5.06596	2.32225	1.87135	1.708	9.11364	8.82722	8.39702	8.22412	1.74043	0.100772	4.62197	4.74327	5.11778	6.69068	4.08978	3.31984
ENSBTAG00000021709	SPI1	0	0	1	0	1.35182	0.940257	2.93166	2.98212	2.68087	3.00344	3.5328	3.58423	0.604027	0.865121	2.04436	2.09784	1.65593	1.7184	0.939165	1.22967
ENSBTAG00000021721	CDSN	0	1	0	0	0.0906067	0.070345	0.313881	0.290142	0.117986	0.0942475	0.683101	0.659363	0.884266	0.860527	4.93081	3.96218	0.203005	0.173387	0.378821	0.866014
ENSBTAG00000021727	NTSR1	1	1	0	0	0.263075	1.17561	0.097655	0.163795	10.2942	10.8431	0.750115	1.41717	0.95128	1.61834	1.46992	2.29985	5.42289	2.45073	0.21636	0.9075
ENSBTAG00000021730	GJD2	0	1	0	0	0.029135	0.0552733	0.244138	0.254339	10.5512	10.7751	0.613357	0.623559	2.3087	1.30339	1.43244	1.59147	5.15635	6.06974	0.0682475	0.0784487
ENSBTAG00000021739	NPPB	1	0	0	0	0.754375	3.42946	2.3625	0.854175	4.58854	6.36919	0.203256	0.4134	1.51609	0.97069	1.49154	2.50271	1.07593	3.80848	1.52065	1.47312
ENSBTAG00000021770	CRYGB	0	1	0	0	0.0616467	0.100478	0.297525	0.310579	5.05665	5.28238	0.66674	0.679794	0.867905	0.880959	0.07435	0.0874038	0.195623	0.183894	0.121635	0.134689
ENSBTAG00000021787	PAQR7	1	0	0	0	8.46552	8.14053	4.93722	5.05483	9.1112	9.67851	2.62267	2.754	0.675262	3.24389	8.81184	8.71256	4.55509	5.23141	8.17916	8.11556
ENSBTAG00000021807	TAC3	1	0	0	0	5.36034	0.602502	4.26352	4.28357	10.3871	10.9708	3.26091	3.53787	2.29116	1.29435	9.56484	8.56545	1.3471	1.89092	5.84438	5
ENSBTAG00000021809	DEPDC7	0	0	0	1	1.16858	1.56901	1.60268	2.36111	1.17293	1.24754	6.12524	6.06251	0.334195	0.517038	1.08364	1.55796	2.43621	2.55062	1.04482	1.38507
ENSBTAG00000021814	DDX43	1	0	0	0	4.55261	0.884703	2.73061	0.477801	8.00629	7.27543	1.35274	0.947511	0.486264	0.146481	3.32582	3.11741	4.73868	4.17139	5.02765	3.56306
ENSBTAG00000021823	HFE2	1	1	0	0	2.78656	4.53658	5.0598	5.62596	1.61997	4.14578	12.3159	12.9109	14.8691	15.1025	1.4245	3.26178	4.19962	4.65855	3.1716	4.08003
ENSBTAG00000021827	TCF21	0	1	1	0	11.0912	10.1704	10.9957	10.4663	1.86345	1.49743	10.8713	10.7321	3.37767	4.97349	14.221	13.8308	9.68533	9.4211	11.5245	11.1637
ENSBTAG00000021833	GJA8	1	0	0	0	6.11276	5.72474	3.79056	1.72104	5.0893	5.20591	3.25088	3.97241	1.70096	0.652245	3.29759	2.99385	2.63251	2.31108	7.5129	7.2712
ENSBTAG00000021841	CHD7	0	0	0	1	1.30209	0.80977	1.56229	1.62639	1.38144	1.46256	0.203827	0.187338	2.01463	2.05194	0.838594	0.954566	2.27946	2.27238	1.26988	1.00181
ENSBTAG00000021876	WDR72	1	0	0	0	5.0584	4.89371	1.51252	1.80767	5.9328	5.50737	2.38693	1.85252	1.34473	1.14642	6.4755	6.43187	6.62244	5.79576	3.83186	1.26569
ENSBTAG00000021885	RSPO4	0	1	0	0	6.52795	5.58178	2.04686	2.84574	0.14607	0.14058	0.711185	0.705695	0.91235	0.90686	3.02962	2.96378	5.38884	5.14834	0.166075	0.160585
ENSBTAG00000021887	DPYS	1	0	0	0	4.37592	4.93816	2.87871	5.86615	2.78347	3.52508	15.4899	15.7194	4.6151	2.89924	2.81888	4.41362	3.92552	2.04789	5.28371	5.23638
ENSBTAG00000021910	TBL1XR1	0	0	1	0	4.4248	4.48159	3.90618	4.07872	3.7929	3.85846	3.47705	3.51319	3.27201	3.55183	4.19329	4.19521	3.97136	3.92856	4.48931	4.31644
ENSBTAG00000021913	MMD2	1	0	0	1	7.59436	9.9857	3.40359	1.99636	12.6587	12.8011	0.0112375	0.254161	1.48679	1.72971	3.15292	3.58263	11.085	11.4171	5.36821	9.68233
ENSBTAG00000021916	MYL4	1	0	0	0	7.65379	4.7255	6.71692	6.04351	7.2581	7.48292	2.62063	0.76693	7.00535	7.54995	5.80411	5.63392	3.69937	5.25321	7.81283	7.66348
ENSBTAG00000021923	DSG2	0	0	0	1	7.92838	8.58532	1.54763	1.65413	2.37048	2.58396	8.08795	8.04872	1.23726	0.97233	4.52355	4.20264	7.59384	7.57762	7.31787	6.83706
ENSBTAG00000021924	PLA2G4E	0	1	0	0	9.28232	6.3975	0.263394	0.0912463	7.90523	7.45904	0.632609	0.460461	6.24359	6.75825	2.64808	1.92558	2.35784	1.38216	9.18023	8.87363
ENSBTAG00000021928	FAM69B	1	0	0	0	9.11067	8.65127	7.56355	7.3135	10.657	10.5677	3.53355	1.86857	6.9225	6.81226	9.88798	9.32069	7.56226	7.25471	9.85757	9.82451
ENSBTAG00000021939	ELAC2	0	0	0	1	3.30793	3.821	3.55404	3.41702	3.40651	3.46995	3.79292	3.73651	3.64984	3.75865	3.14424	3.19381	3.7056	3.71896	3.21555	3.13269
ENSBTAG00000021941	DPP6	1	0	0	0	7.40569	8.87876	3.92713	4.39605	12.3538	12.5643	1.32628	2.9685	2.69703	2.71538	8.61838	8.63568	11.418	11.5754	6.40916	6.33991
ENSBTAG00000021959	CDC20B	1	0	0	0	6.89762	1.91259	1.89489	1.24691	1.72431	1.1522	1.06191	0.484419	1.26308	0.685584	6.71166	4.76841	0.615783	0.0472837	8.5254	2.50487
ENSBTAG00000021970	EYA4	1	0	0	0	4.18599	3.7902	5.71	3.45553	6.6997	6.51673	6.75824	6.32432	12.8369	12.511	3.61033	3.22777	9.93594	9.57596	3.53185	2.21622
ENSBTAG00000021993	SPDEF	1	1	1	0	10.8868	11.7116	4.55618	4.21467	3.13181	3.39525	1.9774	2.17671	4.97889	4.64051	5.45452	3.18976	3.55532	3.31608	10.8501	10.4641
ENSBTAG00000022000	CACNB2	0	0	0	1	2.74211	2.71634	1.94745	1.75151	3.15148	3.13234	0.662613	0.708529	0.622296	0.827695	2.39352	2.45166	3.91898	3.94917	3.0748	3.31284
ENSBTAG00000022058	ACACB	0	1	0	0	1.95494	1.30795	1.92606	1.53492	0.919551	0.699211	1.73008	1.5935	9.2175	9.24729	2.16282	1.70745	1.10043	0.704425	2.07965	1.77576
ENSBTAG00000022120	FGB	1	0	0	0	4.0794	3.9944	4.16861	6.34976	2.8573	2.89799	15.5439	15.606	5.64203	4.83939	2.62173	4.39915	4.17189	2.54561	5.29702	5.18156
ENSBTAG00000022142	SCGB1C1	1	0	0	0	4.25073	2.57002	3.83081	3.75617	5.58798	5.614	0.46969	0.292057	1.04646	1.66571	5.63033	2.84763	7.11409	4.67246	4.4694	5.51114
ENSBTAG00000022155	FSTL1	0	0	0	1	8.37801	7.96031	10.6893	9.99975	5.63012	5.56057	6.55548	6.37679	7.62891	7.4022	8.58344	8.63447	6.86105	6.6223	8.67163	8.6385
ENSBTAG00000022158	TNNT3	1	1	0	0	12.5272	12.7012	13.5024	12.8378	9.77387	11.158	10.8285	10.1046	23.258	23.2369	12.6767	11.8995	12.4505	12.6554	12.5897	12.3136
ENSBTAG00000022205	F1N6D8	1	1	0	0	3.94351	5.36369	3.09073	5.63279	0.675449	1.79299	14.9355	15.3841	4.82197	3.74611	1.50021	4.29915	4.0255	3.04087	3.4319	3.31212
ENSBTAG00000022209	CABP2	1	0	0	0	2.7591	4.69625	2.92976	2.88784	8.33189	8.31133	0.228895	0.901224	0.118655	0.130307	1.11773	1.16038	7.85241	8.14159	4.09275	1.9951
ENSBTAG00000022229	TRAV17	1	0	0	0	1.60572	0.538665	0.0510012	0.238852	2.38096	4.16943	2.00148	2.13622	0.621386	0.809239	2.75513	5.71585	1.50469	0.580968	0.252746	1.24177
ENSBTAG00000022246	C29H11orf86	1	1	0	0	2.26757	1.20594	3.58776	5.87172	1.74589	1.79475	15.5138	15.409	3.88606	3.07043	1.37771	3.521	4.02732	2.69538	4.51077	3.64337
ENSBTAG00000022255	AR	0	0	1	0	3.79964	3.20126	1.86962	2.24167	0.221031	0.667829	4.53684	4.62223	1.75621	2.02043	3.78207	3.62311	2.60271	2.47004	4.24155	3.97734
ENSBTAG00000022329	SLCO1B3	1	1	0	0	4.16387	3.22253	4.33065	6.92915	3.02041	3.91708	16.2432	16.2677	5.8244	4.14494	2.42035	4.80043	4.49569	2.42131	5.90162	5.70941
ENSBTAG00000022360	SOX5	0	0	1	0	4.58171	5.28064	4.29394	4.51936	3.27639	3.53696	4.25193	4.38493	0.425865	0.947041	3.25742	3.41704	4.35761	4.36705	4.0794	4.257
ENSBTAG00000022394	SAA1	1	1	0	0	4.66372	5.89455	3.77967	5.70166	2.04047	2.04297	17.01	16.7868	5.65723	2.49404	2.96949	5.46903	5.43369	5.37439	6.85041	6.2215
ENSBTAG00000022395	E1BJF9	1	0	0	0	7.16567	7.21398	5.69059	6.55488	2.57022	3.22518	17.0282	16.5403	6.61817	3.60845	4.07424	4.43896	5.0577	3.02789	7.05626	6.38843
ENSBTAG00000022396	SAA3	1	0	0	0	11.8465	14.6835	8.68051	10.434	7.00181	7.60413	11.3811	12.9862	7.75117	9.12543	10.4965	10.5693	3.00872	6.79787	9.82322	11.0044
ENSBTAG00000022484	SOX21	0	1	1	0	0.135007	1.26344	0.595959	2.16779	10.7436	11.0168	0.264379	0.349411	1.92839	2.0375	1.51144	1.82074	9.3943	8.9015	0.84274	0.164206
ENSBTAG00000022535	GPR139	0	1	0	0	5.84792	4.24186	1.2991	1.23482	8.04319	8.60124	0.552635	1.20082	0.45659	0.47423	0.119145	1.10447	9.33972	9.79007	2.35799	1.4158
ENSBTAG00000022571	AKR1C3	1	1	0	0	5.09617	4.47119	5.96462	8.21958	2.32587	3.47108	17.3822	17.5561	8.38616	8.04121	3.2599	6.02151	6.04979	4.45102	7.07705	6.96289
ENSBTAG00000022699	CAV3	0	1	0	0	4.15719	2.87784	6.38313	5.98985	2.6644	2.12363	0.911303	1.61003	14.0129	13.737	5.72455	5.51196	2.65992	2.94048	5.84298	6.62014
ENSBTAG00000022714	HSPB3	1	1	0	0	1.41384	2.91962	11.8381	10.892	5.76209	5.97042	3.18232	5.04485	13.0008	13.1906	1.90409	2.37007	3.76641	5.13537	1.68749	1.76461
ENSBTAG00000022715	DMBT1	1	0	0	0	7.82406	2.77784	4.89422	4.45485	1.77891	1.3597	11.6496	11.1758	2.55696	1.3714	4.00984	3.61051	4.47942	3.24274	7.16088	2.87087
ENSBTAG00000022759	F1MC46	0	1	0	0	0.0368983	0.0439983	0.578816	1.17585	0.387781	0.995122	0.648291	0.609391	0.849456	0.810556	6.77184	5.41035	0.178623	0.120516	1.03886	0.364026
ENSBTAG00000022775	C21H14orf180	1	0	0	0	0.793577	0.195532	1.95141	1.88648	9.61117	9.80133	11.0614	11.1108	1.96045	1.05697	2.52155	2.88805	6.80428	8.50066	2.62089	4.65939
ENSBTAG00000022826	RAX	0	1	1	0	0.03291	0.126847	1.2585	0.654848	0.693731	2.10308	0.629731	0.704363	1.13064	1.8412	0.310941	0.966054	5.03065	4.38594	0.0846212	0.159253
ENSBTAG00000022861	KLRJ1	1	1	0	0	8.23125	6.78238	0.811161	1.26362	0.985596	2.22373	3.25892	1.43891	1.07461	0.875884	0.281056	0.0823288	0.420805	0.196859	4.79648	1.56099
ENSBTAG00000022937	ITLN2	1	0	0	0	5.70715	5.91789	2.64382	4.91488	3.92227	4.93542	1.93212	4.52589	4.92094	5.92373	1.86116	1.45707	7.27847	7.33143	4.43338	5.6102
ENSBTAG00000023018	PARG	0	0	0	1	2.88157	2.95343	2.59241	2.50667	2.48626	2.44298	2.88978	2.88611	2.61347	2.6502	2.80681	2.82989	2.50531	2.49683	2.85448	2.73679
ENSBTAG00000023026	SERPINB2	0	1	0	0	3.11733	1.70263	2.84776	2.3955	6.41342	6.64213	4.36469	3.00448	1.28909	2.90813	12.4182	11.1073	5.65133	5.78073	0.752109	0.666856
ENSBTAG00000023039	DUSP13	0	1	0	0	2.20565	2.15506	3.09131	1.43709	2.33804	3.81876	3.23627	3.2147	14.8711	14.857	3.68767	4.58238	3.24555	4.37084	1.50286	1.64046
ENSBTAG00000023146	ADAM32	0	0	0	1	4.21423	2.94888	4.17045	4.12443	3.78787	3.66092	4.90866	4.85656	3.24146	3.15058	2.65874	3.25732	5.49809	5.14421	4.1939	3.75576
ENSBTAG00000023198	SERPINB2	1	1	0	0	2.70171	2.98678	0.906055	0.841433	0.862771	0.641299	1.41254	1.17641	0.382663	0.294987	6.72064	6.12703	2.04791	0.278942	1.08904	1.44069
ENSBTAG00000023207	FAM3D	0	1	0	0	11.1453	10.6924	2.23328	1.19707	0.236219	1.70898	1.39904	1.21746	1.2825	0.426885	3.04279	2.24631	11.0631	10.9425	9.47749	7.59993
ENSBTAG00000023372	MYCN	0	0	1	0	8.00144	7.30303	5.31266	5.56177	9.43438	9.35637	5.15998	4.87996	4.19623	5.01293	10.0294	10.2333	6.83753	6.64426	8.40723	8.03916
ENSBTAG00000023393	AIRE	1	1	1	0	10.3119	10.1544	1.70154	0.251874	5.50821	5.21218	0.293781	0.0518337	0.494946	0.252999	2.98808	1.30576	4.43414	4.48671	8.87606	6.69091
ENSBTAG00000023398	UBASH3A	1	0	0	0	7.1862	6.98739	6.38593	6.89461	0.815615	2.49015	7.62231	7.71572	3.46958	5.34242	7.23361	7.52886	3.75805	4.95782	6.40487	6.86348
ENSBTAG00000023407	B3GALT5	1	0	0	0	9.35668	9.1489	5.87173	6.37902	8.24039	8.67549	10.9668	10.993	0.250294	0.740681	2.90919	1.2368	4.58728	1.98545	7.73474	5.55653
ENSBTAG00000023419	SULT2A1	1	0	0	0	6.0235	6.49742	4.11244	6.94795	2.19608	2.2625	16.3475	16.2448	6.3248	4.15999	6.19349	6.50591	5.1051	3.06161	6.84266	6.51631
ENSBTAG00000023471	RPL36	1	0	0	0	9.43244	8.08759	11.0081	10.583	4.4465	2.26158	9.22761	9.35886	10.4495	10.4855	10.6447	9.56848	5.11509	3.86862	9.19964	9.25169
ENSBTAG00000023549	CYP2C19	1	1	0	0	3.7386	3.90088	4.02217	7.00567	1.86058	2.35496	16.8154	17.1291	6.78799	5.16195	3.23995	5.39345	5.25303	3.48159	6.704	6.52255
ENSBTAG00000023593	GMNC	1	1	0	0	10.4072	9.99346	1.1734	0.663021	4.01867	5.41746	1.05328	0.0737025	2.18421	0.572717	2.9552	1.21184	2.74642	1.20975	9.93512	7.16045
ENSBTAG00000023784	TMEM88B	1	0	0	0	5.63062	5.35373	1.68116	2.72791	12.0225	12.1922	1.23535	0.130124	2.28921	3.08608	4.81089	4.28219	2.91172	1.93676	4.26796	2.41635
ENSBTAG00000023792	RPS19	1	0	0	0	1.17249	1.64407	3.08041	1.71741	3.00157	4.09251	3.13622	4.2961	3.16281	3.50404	4.44359	4.71869	0.843823	4.43141	3.09104	5.12945
ENSBTAG00000023797	PRDM12	0	1	1	0	0.117672	0.168933	0.319734	0.397262	5.90133	7.63082	0.688954	0.766482	0.890119	0.967649	2.05416	0.801208	2.51068	3.66977	0.143849	0.221378
ENSBTAG00000023831	ELP4	0	0	0	1	1.32659	1.07845	1.86029	1.85243	1.56296	1.63364	1.51822	1.48336	2.13612	2.19067	1.66919	1.63241	1.84277	1.79798	1.74163	1.57654
ENSBTAG00000023891	RBM20	0	1	0	0	2.64715	2.27075	1.79058	1.75881	1.53107	1.94807	1.83043	2.09223	8.75403	8.67014	3.54032	3.29977	1.26215	1.1043	1.96395	1.89942
ENSBTAG00000023907	COL18A1	0	0	0	1	5.45995	5.93864	5.12169	5.06482	1.32779	1.21768	7.87508	7.96404	2.46392	2.54409	5.44067	5.39986	2.96002	2.85003	5.25387	6.1173
ENSBTAG00000023920	GPR158	1	0	0	0	2.83083	2.88613	3.84379	2.98163	11.6403	11.8336	0.0630575	1.04635	1.84016	1.98945	5.63639	6.68015	10.5717	11.0582	0.562101	1.85419
ENSBTAG00000023939	F1MLV5	1	0	0	0	8.32515	7.58537	6.95491	8.79546	4.93241	5.55512	17.8096	17.8337	8.18039	7.70988	6.85644	7.4295	6.86616	6.22562	7.98157	7.78258
ENSBTAG00000023941	CPN1	1	0	0	0	9.63961	12.8372	3.72592	4.35384	0.612541	3.16457	12.9553	13.2971	4.99711	5.42819	4.95702	5.01359	1.93282	1.98466	9.30592	10.1339
ENSBTAG00000024015	PTPRM	0	0	0	1	3.5641	3.84634	5.20355	5.25588	3.06668	3.26395	3.22424	3.16421	4.26342	4.31126	4.06849	3.99867	2.71192	2.80936	2.9309	3.17521
ENSBTAG00000024058	EGR4	0	1	1	0	0.046335	0.0547783	0.26202	0.249601	9.33788	8.53183	0.872065	1.37058	0.8324	0.819981	2.88547	3.83119	8.41331	8.03991	0.970289	0.356951
ENSBTAG00000024061	NOTO	1	1	0	0	0.0831383	0.280477	0.301999	0.493306	6.09579	7.53504	0.671219	0.862526	0.872379	1.06369	1.52163	1.85156	0.95979	2.55674	0.455169	1.3446
ENSBTAG00000024075	SLC9A4	0	1	0	0	2.00666	3.00343	1.76901	0.778936	0.125607	0.119331	0.690717	0.684441	1.19409	1.82897	2.4417	2.38053	8.10277	7.99638	1.86128	1.33376
ENSBTAG00000024125	E1B7A8	1	0	0	0	3.04186	0.348118	1.21328	1.12516	2.39174	4.20477	2.04634	2.79365	4.91638	3.97213	5.59005	2.29838	3.46173	5.68692	3.77077	1.77178
ENSBTAG00000024176	HIST1H2AG	1	1	0	0	0.660862	1.73626	0.354449	0.304115	0.158554	0.10822	0.723664	0.67333	0.924828	0.874495	5.34814	5.32935	0.228128	0.20313	2.76236	0.95595
ENSBTAG00000024177	H2B	1	1	0	0	4.20444	4.34908	3.03428	3.27714	0.21951	2.03202	1.9841	3.0393	1.72936	1.82614	8.08243	8.46459	4.02911	3.29399	2.73446	1.78117
ENSBTAG00000024178	H4	1	0	0	0	0.103098	1.19518	1.70159	2.51436	2.40015	0.424864	2.35625	2.94004	4.60644	2.72123	5.32408	5.90609	2.40025	2.68782	2.72108	1.64017
ENSBTAG00000024179	H4	1	0	0	0	6.95754	5.44092	1.72184	1.75994	1.23716	0.140281	3.96273	3.62515	2.27726	2.11779	3.77732	4.78273	3.9758	2.11578	3.33413	3.1068
ENSBTAG00000024182	H2B	1	0	0	0	7.53148	7.83481	6.01567	8.25652	6.66001	7.0294	5.04682	7.26821	5.22588	7.25333	6.9046	8.43531	6.048	8.10419	6.11532	8.07489
ENSBTAG00000024183	HIST1H2AG	1	1	0	0	1.20244	3.3447	1.93383	1.85605	0.15507	0.0212175	0.72018	0.586328	4.5453	4.10893	7.63091	6.40572	1.78272	0.583932	2.73426	0.861057
ENSBTAG00000024185	H4	1	0	0	0	4.90931	5.0738	0.753838	1.50906	0.173588	0.11337	1.63565	3.47836	3.50826	1.70243	4.4821	2.60694	2.39146	2.00474	1.89969	1.80765
ENSBTAG00000024186	H31	1	0	0	0	4.36614	3.11245	0.284548	0.325835	0.485052	1.36733	3.43666	2.61458	0.854934	0.89622	4.51986	6.56728	0.124502	0.24193	2.09253	1.87476
ENSBTAG00000024188	H2B	1	0	0	0	5.57003	4.56885	3.49524	5.45157	1.735	3.82849	0.131714	1.13851	3.21719	3.47537	6.45563	6.74062	1.80466	2.6177	3.84469	1.909
ENSBTAG00000024195	LDLRAD1	0	1	0	0	11.6438	12.5192	1.17726	1.05779	2.98396	2.86774	0.501414	1.12964	0.361949	0.267509	5.54451	3.73167	1.10569	0.0292288	10.6302	10.0852
ENSBTAG00000024219	TRPV6	1	0	0	0	8.60357	8.56573	2.4882	3.33896	8.43956	8.27183	5.56645	7.28064	1.37622	0.589108	5.38331	4.65715	6.41179	6.39481	8.01741	6.90091
ENSBTAG00000024245	TRY1	1	0	0	0	0.0483	0.36133	2.9223	5.3391	0.401621	1.41944	8.90048	7.78424	1.95124	4.63098	0.795681	2.70741	0.113042	0.44722	0.0857663	0.391025
ENSBTAG00000024255	UOX	1	0	0	0	2.66915	2.62711	4.1105	5.41929	0.973893	2.855	14.3389	14.4367	3.78765	3.51296	6.01903	6.22193	3.23955	1.97656	3.88806	3.65082
ENSBTAG00000024288	F1MP21	1	0	0	0	3.57928	3.18549	3.96193	4.03094	5.16437	5.1081	2.6032	4.24329	3.59545	4.33909	2.52106	2.36465	3.0544	2.68424	3.795	4.40271
ENSBTAG00000024341	HOXA6	0	1	1	0	12.5685	11.8366	12.6284	12.5198	2.1565	2.178	4.14108	3.89834	10.5054	10.42	8.44505	7.88253	1.14889	0.940999	13.3695	13.3222
ENSBTAG00000024379	LRRC17	1	0	0	0	10.2826	8.62762	10.2264	9.23624	3.40373	2.483	3.2663	1.65425	6.74925	6.63615	12.0802	11.1876	5.78683	5.71489	9.97548	8.73755
ENSBTAG00000024394	SEMA3D	0	0	0	1	4.03245	3.44221	2.60649	2.65455	4.74829	4.83847	3.32349	3.13645	0.905222	0.848614	4.44219	4.43973	2.54393	2.47095	3.76816	3.36679
ENSBTAG00000024406	AGR2	1	0	0	0	10.444	10.9458	2.18332	2.12184	0.872993	2.50658	4.60327	5.32088	2.20301	2.26023	6.97497	4.00638	10.2599	10.3098	10.2059	9.70706
ENSBTAG00000024453	RD3	1	1	0	0	2.09148	3.42825	0.464691	2.3208	1.14561	1.35481	0.100061	0.399253	0.649251	1.6868	0.177321	1.89724	11.4474	12.114	1.66591	2.53979
ENSBTAG00000024490	ULBP27	1	0	0	0	1.55926	1.38308	5.61844	3.41711	1.21015	2.49518	2.61121	2.31046	9.48534	8.87588	4.45158	2.89831	4.51174	5.1532	2.64206	2.47546
ENSBTAG00000024493	DHRS3	0	0	0	1	5.33823	5.35516	6.15301	6.19625	4.71138	4.76896	7.61945	7.66311	5.52749	5.92481	6.91078	6.7201	4.20032	4.24649	5.41814	6.18218
ENSBTAG00000024496	ELA2A	1	0	0	0	3.14963	4.33662	2.3132	3.9908	3.02412	4.0455	0.961637	4.18001	1.61655	2.48681	1.90853	1.20047	4.0838	2.84914	1.10797	2.87088
ENSBTAG00000024497	CTRC	1	0	0	0	1.88184	2.72949	3.07069	4.15001	1.01423	1.1322	4.84681	4.93794	0.332355	0.342847	0.181145	1.55443	2.26877	0.432898	3.0257	1.60485
ENSBTAG00000024508	CALML6	1	0	0	0	8.34686	7.70174	7.17243	7.86904	5.54885	6.21511	0.887796	1.78827	10.3482	10.7172	7.15861	7.51032	2.28627	4.90881	7.56303	6.03132
ENSBTAG00000024534	POU2F1	0	0	1	0	2.03076	2.11433	0.648084	1.01442	2.11392	2.19498	0.792112	0.599311	1.09972	1.30781	2.08134	2.11226	2.60695	2.54403	2.41511	2.29505
ENSBTAG00000024545	DCHS2	0	1	0	0	3.14447	2.28667	10.3133	10.4885	8.65517	8.96998	1.09022	1.32252	4.31902	3.37957	3.47963	3.26838	7.83288	7.49873	1.97634	2.95297
ENSBTAG00000024552	SHH	1	1	0	0	2.25264	2.96772	1.02983	0.598988	10.1004	10.3402	5.73118	6.14464	1.08228	1.77922	1.10686	0.471982	1.16469	3.18837	0.0590588	0.168457
ENSBTAG00000024809	MGC137030	0	1	0	0	0.471997	1.6472	0.231189	0.339481	2.21049	2.778	0.927674	1.73028	0.801574	0.909868	0.380494	1.27903	1.47351	0.598191	0.0553037	0.163596
ENSBTAG00000024826	TECRL	0	1	0	1	3.75462	2.21901	1.34626	0.571098	2.02487	0.655353	2.56031	1.21096	12.4083	12.1234	0.23892	0.0646775	0.993303	1.95109	0.28621	0.111967
ENSBTAG00000024874	MAD2	1	0	0	0	7.72367	8.25494	7.27987	8.31345	6.68247	6.65444	6.54027	7.09521	1.8511	5.27785	7.66317	7.88932	7.40851	7.98663	7.88468	8.23915
ENSBTAG00000024899	MGC134105	1	0	0	0	3.3971	0.626752	5.97268	4.04844	1.31909	0.892017	12.8881	11.9161	3.63644	1.20537	1.53934	1.82686	4.44799	3.42937	4.69087	4.23853
ENSBTAG00000024903	KCNJ16	1	0	0	0	8.78753	6.83279	3.45793	1.4304	11.9898	11.6557	3.36575	2.49146	3.5497	1.85343	6.58069	5.51312	2.42666	1.45425	7.1105	3.02076
ENSBTAG00000024910	GALR2	1	1	0	0	6.87336	3.41299	0.271936	0.138728	3.28659	3.74081	0.641156	0.507947	0.842321	0.709113	1.30854	1.14434	0.175578	0.0348125	8.62024	8.07534
ENSBTAG00000024915	SECTM1A	0	1	0	0	4.17116	4.75029	9.33997	8.62507	4.13676	3.0461	6.68925	7.28821	6.22552	5.55988	11.1111	11.0966	3.72731	3.28719	3.2289	2.72954
ENSBTAG00000024926	TMEM235	1	0	0	0	0.508197	1.9967	0.570804	1.73978	3.23947	6.18459	0.618359	1.10491	1.16613	2.388	2.20972	4.21523	3.55862	6.75249	0.0732538	0.559801
ENSBTAG00000024929	PPP1R27	0	1	0	0	6.2416	6.75795	6.15781	4.64052	4.70257	4.53723	6.74451	6.95637	16.986	16.8859	6.68076	6.29311	6.91607	7.15665	5.9903	6.21396
ENSBTAG00000024942	RPRML	1	0	0	0	4.47366	2.90461	7.1502	6.55142	9.32438	9.08502	2.68492	1.88431	5.56673	4.99927	5.63346	5.46169	11.3002	11.2747	4.63973	1.89647
ENSBTAG00000024957	SNCA	1	0	0	0	9.30347	7.25653	8.94391	8.33668	14.1859	13.7268	7.07722	6.66917	8.14404	6.3495	8.73763	8.59978	12.0466	11.959	10.1858	9.6349
ENSBTAG00000024979	HSPB9	1	0	0	0	0.0618367	2.77695	4.59291	6.36668	3.15043	5.76664	2.12788	4.26578	2.27444	4.34943	2.34861	3.26634	0.104178	2.61925	1.49877	3.74373
ENSBTAG00000024984	FSBP	1	0	0	0	5.03889	5.85411	3.61891	3.92648	6.12935	5.68551	3.64846	2.37005	2.18624	4.198	5.04859	5.66132	5.13642	6.03967	3.64899	3.43798
ENSBTAG00000024999	UTF1	1	0	1	0	0.0357467	0.292417	1.26813	0.80027	7.76045	7.63411	0.63936	0.84978	1.17474	2.09421	0.725455	2.37534	0.14578	0.35281	1.31224	4.1067
ENSBTAG00000025009	HOXB9	0	1	1	0	11.9115	12.5906	6.7347	6.22243	1.35786	1.87424	1.4388	1.44315	4.11635	4.39267	3.9633	4.04052	0.0811	0.72501	11.1553	10.4571
ENSBTAG00000025101	ASGR2	1	0	0	0	8.74583	10.2236	11.4911	11.7024	5.69214	5.58415	16.8283	16.7111	7.11424	5.38739	6.49347	6.6852	5.83491	4.38526	7.17699	6.97166
ENSBTAG00000025124	ZNF300	0	0	1	0	3.69083	2.89536	2.4264	2.22017	2.18219	2.11359	0.668783	0.868984	1.01595	1.17463	3.73058	3.65102	5.35122	5.74165	3.92756	3.43225
ENSBTAG00000025129	MNT	0	0	1	0	1.28646	1.54125	1.14166	1.36597	0.92016	1.22869	0.997179	0.893901	0.609071	0.685418	1.36429	1.25286	0.590479	1.24938	1.21526	1.43838
ENSBTAG00000025181	CCDC85C	0	0	0	1	0.849512	1.41945	1.28787	1.49345	1.65118	1.58185	2.39846	2.26046	0.571888	0.554661	1.32475	1.18847	1.61613	1.63037	0.867737	0.991725
ENSBTAG00000025183	ANKRD40	1	0	0	0	5.82024	5.36315	3.96274	4.82761	3.69219	4.13349	2.97323	4.55277	0.968289	0.946888	6.07597	5.84543	4.98889	5.03984	6.31629	6.63301
ENSBTAG00000025200	ACCN1	0	0	0	1	7.82185	4.90317	8.19195	7.59092	10.4944	10.7982	1.34784	2.12944	5.49476	4.77188	5.5977	4.81264	3.41785	4.67081	9.99269	9.8028
ENSBTAG00000025213	OMG	1	1	0	0	1.32135	1.39025	0.77061	0.339124	13.2985	13.4467	1.21198	0.731454	0.85996	1.46871	0.04195	0.598826	2.50791	4.51652	0.702305	0.197699
ENSBTAG00000025242	C19H17orf78	1	0	0	0	4.11822	5.18189	2.3304	2.41297	2.11727	2.52496	4.05657	2.48612	1.34649	0.06726	3.97711	3.56755	4.00662	3.07415	4.82073	3.77633
ENSBTAG00000025246	ZIC2	0	0	1	0	3.52979	1.50535	4.26695	5.02648	11.5705	11.3443	0.0470663	0.503757	6.32789	6.11463	5.92615	5.45985	4.98422	5.92789	4.09452	5.05757
ENSBTAG00000025250	CCL3	1	0	0	0	4.91496	2.63855	5.15451	5.4946	6.42666	6.34485	8.43613	7.83107	3.87874	3.6038	6.6888	6.32826	6.73851	5.86216	4.33117	1.59507
ENSBTAG00000025260	EXPI	1	0	0	0	2.6884	2.6396	3.22332	6.39398	2.2915	0.462472	11.201	10.8902	1.14431	3.01996	0.119876	1.5057	9.85413	8.57935	2.32766	0.487652
ENSBTAG00000025308	STON2	0	0	0	1	1.10511	0.637702	0.528797	0.643918	2.19345	2.53967	1.67254	1.78268	1.93033	2.17149	0.841927	0.657112	1.16186	1.03196	1.02178	0.505441
ENSBTAG00000025324	NRXN3	1	0	0	1	5.6703	3.69904	2.27101	0.454328	12.6103	12.8357	0.152914	0.0267325	0.970026	2.15063	3.01263	3.06569	6.13451	6.66565	3.13373	1.33608
ENSBTAG00000025385	RPL12	1	0	0	0	7.54237	5.44053	7.54665	6.12229	4.56063	3.13376	6.33154	4.93256	6.83127	5.39511	8.2032	6.6162	6.64614	5.23805	8.60395	6.85002
ENSBTAG00000025426	NSD1	0	0	1	0	3.40516	3.33198	2.96397	3.2119	2.8666	2.89806	2.79017	2.85697	3.19035	3.41329	3.52778	3.61271	3.48596	3.56758	3.70761	3.6644
ENSBTAG00000025477	KIF3A	0	0	0	1	2.56229	2.57456	2.1583	2.15289	5.06427	5.03682	1.19739	1.24897	2.02056	2.0785	2.46368	2.65396	3.94982	4.00834	2.51302	2.31824
ENSBTAG00000025485	E1BKD8	0	1	0	0	8.16399	7.88149	5.03828	5.51077	3.0482	2.60608	11.4882	11.6518	6.28773	5.56414	12.1827	12.0101	4.5179	4.11864	5.92569	4.09169
ENSBTAG00000025652	BEST2	1	1	0	0	7.09027	5.47536	2.56718	1.38425	7.07268	6.64956	1.54961	0.62099	0.918813	0.555635	0.999763	0.042225	0.591818	0.80591	5.91017	1.64742
ENSBTAG00000025664	RNASE3	1	0	0	0	0.139458	0.152243	0.350049	0.374249	2.89642	2.01952	7.12888	7.17719	0.920434	0.944635	1.14032	3.31464	0.234403	0.260644	1.44447	0.605304
ENSBTAG00000025748	CYP4F2	1	0	0	0	1.80036	6.06609	0.267578	0.742799	0.351832	1.42141	2.83255	5.57374	0.837963	1.31318	0.0444025	0.519624	0.427748	1.50476	1.09856	3.70995
ENSBTAG00000025767	TMEM221	1	0	0	0	8.17207	7.96969	1.98852	1.86687	7.29705	7.2951	0.938408	0.0759787	2.25467	0.634364	7.41758	6.86514	10.1048	9.81743	5.98635	4.76122
ENSBTAG00000025775	INSL3	0	1	0	0	7.17104	6.77916	7.3572	7.39933	4.09313	3.44871	4.72429	5.46428	6.65265	6.5595	16.5171	16.2848	7.34593	7.15668	6.20998	5.92028
ENSBTAG00000025893	CDH12	0	1	0	0	5.75089	8.11732	2.64033	1.49032	9.98969	10.0354	0.07824	0.184481	0.279405	0.385646	11.0469	11.1019	6.5036	6.00948	3.06011	5.20451
ENSBTAG00000025920	E1BJM8	1	1	0	0	4.68269	9.77192	0.0630825	0.564266	0.869789	1.34973	0.891153	2.36583	0.857788	1.83489	0.350457	1.93481	5.49469	4.1003	3.44543	8.37045
ENSBTAG00000025942	BT.43717	1	0	0	0	6.26819	9.15928	6.40775	6.51798	4.42964	4.71903	6.4378	6.82543	4.67132	4.65623	6.15405	6.38553	0.952047	1.73424	5.76462	8.31663
ENSBTAG00000026085	ZP4	0	1	0	0	0.0358783	0.052955	0.531177	1.12819	0.0583425	0.0678	0.623452	0.63291	0.824618	0.834075	8.99091	8.92991	3.02346	2.58498	0.0783475	0.087805
ENSBTAG00000026102	PAG9	0	1	0	0	0.0341383	0.108275	0.24379	0.323701	0.347645	1.06349	0.61301	0.692921	1.11392	1.82977	1.557	2.32049	11.1597	10.4549	0.067905	0.147816
ENSBTAG00000026163	ERMAP	1	0	0	0	6.82868	6.56385	4.25699	2.53336	3.94524	3.25272	3.88226	1.17609	3.29837	2.08844	6.21991	2.49323	0.511842	0.808695	8.13629	7.14224
ENSBTAG00000026185	F1MR32	1	0	0	0	8.21331	8.8505	7.0705	7.56601	9.60812	9.39568	0.900138	1.97321	4.76751	6.3341	7.23525	8.16177	4.02322	6.0332	6.97934	8.23784
ENSBTAG00000026194	AMZ1	1	0	0	0	4.2195	2.80566	1.65406	3.43926	8.67093	8.76121	2.43457	2.91486	1.99882	1.71081	5.17051	5.136	7.19183	7.24291	5.27389	4.52393
ENSBTAG00000026273	MYL10	1	0	0	0	4.59391	2.87884	0.196825	0.118989	4.06799	5.93105	0.566045	0.488209	1.21884	2.09917	1.73916	1.47637	2.43846	2.97039	4.77781	1.46697
ENSBTAG00000026275	CCL24	0	1	0	0	2.84881	2.46941	8.38885	8.52602	0.857331	1.28562	3.59905	4.19691	4.30991	4.29899	4.29838	4.36523	3.2717	2.99316	1.9712	2.33286
ENSBTAG00000026319	ASPHD1	1	1	0	0	2.87506	1.82596	0.870598	0.0715213	13.0451	12.8866	1.12431	0.403736	2.59653	1.86535	1.85962	4.04553	11.9723	12.0136	0.912364	0.849591
ENSBTAG00000026323	LYSB	0	1	0	1	1.48967	0.47463	4.92948	4.12252	0.148633	0.0690338	0.713742	0.634144	2.09162	2.00569	6.82434	6.7712	0.230972	0.162529	0.168638	0.0890387
ENSBTAG00000026325	ZG16	1	0	0	0	2.18688	3.0398	2.64368	2.72609	2.18735	0.264026	3.13479	2.95205	0.273765	0.171811	3.80376	2.83137	1.96498	2.39867	2.41219	1.74447
ENSBTAG00000026344	MAFA	0	1	1	0	0.0993217	1.25557	4.13175	3.41509	5.57134	6.7852	0.525353	1.41201	13.299	13.3295	1.35029	2.48374	8.63889	8.50078	2.36192	2.34171
ENSBTAG00000026365	SF3B4	0	1	0	0	0.497262	1.51639	0.29022	0.392617	0.403525	1.16191	0.659435	0.761832	3.62428	2.98021	0.06704	0.169437	0.501122	1.27869	0.414075	1.15241
ENSBTAG00000026408	ZNF213	0	0	1	0	1.65577	1.76265	0.603918	0.451558	1.43841	1.4866	1.03493	0.813823	1.29329	1.23084	1.48938	1.28347	1.5114	1.45429	1.64165	1.46115
ENSBTAG00000026418	HBA	1	0	0	0	1.37344	4.85733	8.13402	8.22436	9.17727	9.59802	8.62204	8.91971	2.42977	3.04069	7.01481	6.70554	5.65308	6.12823	4.3929	5.11336
ENSBTAG00000026481	RGS8	1	0	0	0	0.14808	0.02808	4.08031	2.30739	13.9122	13.7612	6.67052	5.10305	1.28792	1.90206	1.9826	3.01231	9.87771	9.40215	2.34614	0.715549
ENSBTAG00000026505	STMN1	1	0	0	0	0.780122	4.47228	5.57712	8.74319	4.65673	8.84619	0.12861	1.21267	1.14576	3.961	2.80803	6.89915	1.69393	6.63818	1.33602	6.13819
ENSBTAG00000026580	HTR1E	1	0	0	0	4.04887	3.67624	5.11388	5.03998	8.80942	8.69838	5.5801	5.31957	3.01107	2.79452	4.4494	3.73544	1.42155	2.99637	4.20224	4.77799
ENSBTAG00000026626	ANHX	1	0	0	0	3.44259	4.57696	1.34577	2.37375	5.27625	5.38378	0.818161	1.48396	2.26511	1.20438	0.876136	2.86957	4.18635	4.48435	2.76913	2.59321
ENSBTAG00000026638	CATSPER4	1	0	0	0	7.8924	8.86813	4.59115	6.5432	0.124793	1.7749	6.87719	7.39422	9.30159	9.80141	3.20029	4.0917	7.56961	8.5342	6.7943	7.58042
ENSBTAG00000026666	MGC137014	1	1	0	0	6.10128	5.12604	4.63733	8.48156	2.47354	2.99604	18.1518	18.485	8.14939	7.62389	3.73739	6.77662	7.96285	7.71194	7.85009	7.89509
ENSBTAG00000026708	PRSS35	0	1	0	0	8.1484	8.37631	0.876059	0.761954	0.951812	1.24398	2.10721	2.20084	0.413339	0.869981	8.75218	8.391	1.96212	1.88229	8.31628	7.43735
ENSBTAG00000026732	PLA2G1B	1	1	0	0	5.6341	2.24521	2.35507	2.04347	6.26494	3.86564	2.29128	1.06493	1.96765	3.54207	12.3822	12.002	10.7953	9.90754	2.36678	1.96564
ENSBTAG00000026768	TH	1	0	0	0	6.19041	6.0648	8.6293	8.81176	8.15269	9.68914	5.42169	5.08389	7.12741	7.1362	6.2455	6.12884	2.65419	4.10579	6.30876	6.66405
ENSBTAG00000026769	ASCL2	1	0	1	0	6.88593	6.65748	7.24047	7.3559	1.99345	2.00639	4.8468	2.41753	5.16271	2.68835	1.1118	0.945266	0.336335	0.732905	7.60971	6.83123
ENSBTAG00000026788	SHOX	0	1	1	0	0.11875	0.0513683	1.36636	0.6124	3.12665	3.63982	0.702935	0.65081	0.9041	0.851975	0.11054	0.058415	1.48461	0.54832	0.15783	0.105705
ENSBTAG00000026917	SERPINA3-7	1	1	0	0	3.47682	4.63098	5.45411	8.09975	2.03515	3.0236	17.3639	18.3198	7.9061	5.28712	4.05389	6.63444	6.74437	5.30612	6.19318	7.58824
ENSBTAG00000026944	LILRA4	1	0	0	0	6.02148	5.805	8.44824	8.42559	2.4591	4.26962	7.67751	7.67887	5.13928	5.61098	6.86791	6.96819	4.62499	4.82629	5.50117	5.61951
ENSBTAG00000026972	MYF5	0	0	1	0	0.142937	0.041135	4.82351	3.73439	1.53652	1.99589	4.10201	3.82474	9.82561	10.0244	2.05706	1.35203	1.29418	0.456637	0.169399	0.0783625
ENSBTAG00000026986	TTN	0	1	0	0	2.01145	2.66553	2.6502	2.06149	2.48488	2.86088	1.76282	1.71524	12.9125	13.0843	2.80713	2.37898	2.65679	2.91726	2.42412	2.00605
ENSBTAG00000027017	SIX3	0	1	1	0	2.83706	3.83965	1.81815	0.123397	11.0173	11.8051	2.05488	2.19466	2.98646	1.80208	3.85543	4.28596	13.2546	13.1919	1.51031	1.75407
ENSBTAG00000027033	E1BIP7	1	0	0	0	5.04679	4.15426	3.32613	4.62371	1.17853	1.85795	5.45465	4.75112	0.88545	2.61066	4.3963	1.97709	1.16721	0.942747	4.94858	5.84049
ENSBTAG00000027058	MESP2	0	0	1	0	8.14469	8.03331	7.67941	7.5876	8.60956	8.25427	0.943781	0.0674338	1.65233	1.41765	6.47685	5.60738	5.13864	3.1567	8.34662	7.10592
ENSBTAG00000027064	BTBD11	0	0	0	1	5.7987	6.02307	0.964024	0.727448	6.53715	6.85173	3.39994	3.24852	4.59132	4.81693	4.94342	5.25873	4.25828	4.30074	5.70053	5.48181
ENSBTAG00000027126	MUC15	1	0	0	0	0.108402	0.0152717	1.64365	0.6207	3.38315	4.45576	1.41751	0.799195	1.7958	1.66784	1.0634	0.80631	4.01515	1.82705	0.872408	0.25409
ENSBTAG00000027151	ARHGAP26	0	0	0	1	2.70886	3.59833	1.30381	1.77385	2.33826	2.59267	0.982757	1.05382	0.272719	0.485685	1.08792	1.23527	1.72937	1.87316	2.0325	2.34212
ENSBTAG00000027205	PGBD5	1	0	0	0	9.34534	9.51571	7.10709	7.59039	12.2056	12.2591	6.23391	7.63948	7.15889	7.92405	9.13097	9.67403	11.6861	11.6645	9.41802	9.05671
ENSBTAG00000027225	LAP	1	0	0	0	4.44554	1.25505	3.6054	2.33172	0.497381	0.0610062	1.0625	0.626121	2.49084	1.22042	4.75539	1.40653	2.42935	0.706351	2.12488	1.70638
ENSBTAG00000027275	F1MMM3	0	1	0	0	0.482225	1.55219	0.5754	1.38708	0.046975	0.153179	6.8924	6.71596	0.813255	0.919459	0.019695	0.125899	0.12538	0.225019	0.388645	1.17728
ENSBTAG00000027312	ECT2L	1	0	0	0	10.1802	8.82584	6.16107	4.42927	6.12666	5.48374	9.83004	8.7367	3.27617	1.89979	6.37929	4.6833	6.60068	5.13837	9.00559	6.47758
ENSBTAG00000027326	TP53RK	0	0	0	1	2.08106	2.20463	2.13171	2.07795	1.97506	1.95656	2.90565	2.94118	1.93257	2.05841	2.24928	2.29959	2.18282	2.13666	2.23176	2.0944
ENSBTAG00000027405	C13H20orf195	1	1	0	0	8.88909	8.41813	1.48284	1.90151	6.27719	6.11641	0.343995	0.0912275	0.86082	1.27774	6.34169	4.41929	2.62566	0.410567	7.9486	5.3306
ENSBTAG00000027416	CALML3	1	0	0	0	1.53462	4.97307	2.31336	3.24571	0.51268	1.53411	0.678245	0.852004	1.27818	2.29796	0.08585	0.259609	1.7532	0.791334	1.36801	0.702489
ENSBTAG00000027420	CST15	0	1	0	0	0.221447	0.0182183	0.405779	0.258763	0.209889	0.0628725	2.27124	2.06999	0.976164	0.829148	9.78435	9.57725	1.76465	0.573473	4.09594	2.31895
ENSBTAG00000027524	SMTNL1	0	1	0	0	1.52841	1.92909	4.263	4.63407	0.974337	1.81357	2.34208	2.28525	11.4425	11.3856	4.06735	4.49275	0.8439	1.64986	0.719503	1.41212
ENSBTAG00000027562	C15H11orf94	1	0	0	0	4.76496	6.15989	6.51391	5.66903	1.38102	3.18312	6.05131	5.08924	1.95133	3.60404	2.20734	3.34337	5.90264	5.65052	5.6908	5.73625
ENSBTAG00000027577	C15H11orf91	1	0	0	0	2.726	1.36115	5.62519	4.64261	1.35566	2.507	6.19508	6.31848	4.05315	3.05499	4.15759	2.32133	2.2993	0.862653	2.53801	3.15429
ENSBTAG00000027629	A2VE25	0	1	0	0	1.67334	1.38597	2.20458	2.36109	4.90083	4.88472	0.570766	0.468139	11.0552	11.0459	0.847409	0.927009	3.55486	3.40637	0.958745	1.01406
ENSBTAG00000027854	ARHGDIG	1	0	0	0	8.96284	10.5445	5.65199	4.9145	13.0712	13.6322	1.46556	1.87115	1.56519	4.61502	6.43142	6.71214	10.1045	9.59769	8.79302	10.0544
ENSBTAG00000027865	GZMA	1	1	0	0	8.55423	7.82322	0.340251	0.0347913	0.802436	1.89314	5.62885	3.79448	1.28311	1.76789	1.91873	1.19863	4.25907	1.07275	6.46507	3.2828
ENSBTAG00000030185	F1MJ14	1	0	0	0	0.138537	0.02577	0.354744	0.258514	0.671259	1.66215	2.12035	1.07507	0.925122	0.828894	0.131569	0.0353388	0.261255	0.137419	2.94295	0.968104
ENSBTAG00000030199	E1B871	1	0	0	0	6.96213	6.1355	4.50338	4.12038	6.87962	6.63525	1.21239	1.14918	1.02487	0.104457	7.72432	7.38484	8.13421	7.35729	5.91217	5.04083
ENSBTAG00000030246	ENTPD8	1	0	0	0	5.82003	4.96719	5.95284	7.79207	0.605193	1.45436	14.2948	14.3985	3.16405	4.20664	2.84791	2.58196	4.25276	3.1863	5.28043	4.94897
ENSBTAG00000030297	MGC137099	1	0	0	0	8.84352	10.1689	8.37952	10.2593	5.02201	5.28768	19.2883	19.4276	9.23654	8.50939	5.96173	8.11006	8.29324	7.51076	9.06913	9.15681
ENSBTAG00000030343	FGF23	0	1	0	0	1.95034	1.91849	2.54226	1.97724	0.362185	1.11719	3.88428	4.87693	0.78783	0.820164	7.54661	7.12828	0.10958	0.133189	0.04156	0.0738938
ENSBTAG00000030367	RNF186	1	1	0	0	8.78607	9.44311	0.600299	1.62982	0.675504	2.28018	6.17615	8.51793	0.760269	0.919071	0.910079	0.427721	0.0611283	0.239461	7.58656	6.17878
ENSBTAG00000030413	LACTBL1	1	1	0	0	7.69858	6.43513	1.83625	0.167101	2.09997	1.06825	1.2042	0.215561	0.521199	0.133481	3.49797	2.25132	2.03047	1.91111	5.41117	1.9495
ENSBTAG00000030472	TAS2R42	1	0	0	0	1.25963	2.69948	3.30683	4.51894	2.74166	1.93912	0.800854	1.62761	0.386285	2.7194	3.86169	2.79224	3.46703	5.01202	5.09292	4.85578
ENSBTAG00000030482	KLK6	1	1	0	0	0.0429633	1.01145	1.64767	2.15378	14.0539	14.4719	0.89815	2.51773	1.06597	2.61478	3.09517	1.60389	0.582375	2.33158	2.09131	1.67838
ENSBTAG00000030484	KLK12	1	0	0	0	9.89535	10.9988	8.73117	8.75292	5.36866	6.44775	0.0631575	0.198792	6.7633	6.7452	8.96659	8.48951	0.548115	2.4301	8.601	8.81494
ENSBTAG00000030504	H4	1	0	0	0	7.4619	8.25192	5.19517	6.81399	1.04329	1.1579	3.92724	3.59714	7.23846	5.07189	6.02297	5.31746	4.53265	4.65697	6.07521	6.83491
ENSBTAG00000030523	ZPBP2	1	0	0	0	7.48947	8.3844	4.63772	4.82106	4.78089	5.37793	5.89047	6.08865	0.0403025	2.33605	8.16859	8.32854	7.42634	7.26238	6.98358	6.71759
ENSBTAG00000030543	SLC6A16	1	0	0	0	5.1274	5.8148	6.42756	7.94348	1.94438	4.29189	2.27086	4.24012	4.19076	5.02293	5.11895	6.36603	4.80944	4.68236	5.98831	7.13303
ENSBTAG00000030556	ZNF217	0	0	1	0	3.04318	3.47064	2.88064	2.81404	0.678411	0.803249	1.65455	1.60472	0.808205	0.923096	2.7781	2.70847	2.05689	2.01978	2.42905	2.48384
ENSBTAG00000030585	CLDN14	0	1	0	0	0.06584	0.193587	0.825453	2.15047	0.0729475	0.217084	13.6526	13.7935	2.23333	2.35664	0.734708	2.34069	0.542338	1.39812	1.17934	0.585114
ENSBTAG00000030623	HEATR8	1	0	0	0	2.23089	2.12297	0.0911425	0.303095	0.380642	1.62239	0.460363	0.672315	0.990583	1.90065	0.932383	3.40258	4.58836	2.67048	2.32655	4.24638
ENSBTAG00000030629	MGC127133	1	0	0	0	2.80507	0.585442	0.614666	1.42484	0.891493	0.0206862	10.8837	10.7697	3.649	1.42486	1.96206	3.02486	1.24049	0.171001	2.06136	0.409051
ENSBTAG00000030683	HP251	1	1	0	0	6.30571	5.28982	6.06786	9.10202	4.13983	3.63863	18.5998	18.7615	8.16597	6.70259	4.04576	6.97729	7.72497	6.80692	8.19016	8.24379
ENSBTAG00000030757	ELFN1	1	0	0	0	4.15804	4.61042	3.3288	1.05438	8.94778	9.04707	2.9695	1.95709	1.3288	0.06534	3.07201	4.26201	7.91437	7.81621	3.04142	4.63803
ENSBTAG00000030792	U730	0	1	0	0	5.91165	6.5396	2.45688	0.923137	10.5876	10.6376	2.77774	3.61929	3.61363	3.75861	3.26385	4.70166	14.0401	14.1287	5.63703	4.15022
ENSBTAG00000030798	WFDC11	1	1	0	0	2.31814	7.76625	0.296786	0.734994	0.462021	1.66639	0.666006	1.10421	1.96226	1.65619	0.0736113	0.511819	0.167788	0.584029	3.48829	7.93445
ENSBTAG00000030800	WFDC10B	0	1	0	0	3.1902	4.60841	0.306299	0.314249	0.110404	0.118354	0.675519	0.683469	2.26469	1.32928	0.0831237	0.0910738	0.203518	0.188394	0.130409	0.138359
ENSBTAG00000030809	C3H1orf141	1	1	0	0	6.33784	6.05452	0.225854	0.0525725	4.33419	5.62537	0.595074	0.421793	0.796239	0.622958	2.99453	2.33369	3.21647	1.83065	5.40267	2.31635
ENSBTAG00000030814	TFF2	1	1	0	0	7.54469	2.19525	0.926283	1.29761	2.6692	0.707843	1.61269	2.65697	1.13433	0.736942	9.70382	9.39338	0.47755	0.0881975	6.38498	1.91179
ENSBTAG00000030847	GLYATL2	1	0	0	0	2.79157	1.82487	0.171777	1.04406	0.611517	2.83234	4.09413	3.36596	0.348202	0.384671	5.18094	5.33689	1.54138	1.23359	1.96222	1.28449
ENSBTAG00000030852	MGC137454	0	1	0	0	0.09617	0.0109017	1.39804	0.578838	9.21896	9.42596	2.06592	1.04373	0.877657	0.799792	0.0840975	0.0062325	0.213217	0.112102	0.131383	0.0535175
ENSBTAG00000030898	MS4A13	1	0	0	0	4.95803	6.2049	5.79511	6.55367	4.08802	5.43573	2.02376	1.52663	5.01064	5.86317	5.5729	5.80294	2.06584	3.62435	6.0415	7.01299
ENSBTAG00000030908	OR9Q2	1	0	0	0	2.89117	9.43853	0.34188	0.905566	5.32967	7.45867	1.71518	1.59644	0.91226	1.47594	0.1187	0.682386	0.171773	0.772126	2.318	7.44735
ENSBTAG00000030956	ZSCAN21	0	0	1	0	4.41147	4.42263	4.20033	4.12639	2.896	2.9551	4.2	4.1813	4.22429	4.26884	4.05181	3.87888	3.31137	3.29512	4.22008	4.13243
ENSBTAG00000030973	TUBA1D	1	0	0	0	13.198	12.6268	4.18204	4.68776	9.30089	10.3944	7.7252	7.25878	6.29967	5.81316	9.03385	7.168	11.1886	11.0045	12.1865	9.94159
ENSBTAG00000031004	CNFN	1	0	0	0	0.22529	1.15797	5.02767	2.52344	3.63557	3.85522	0.312536	0.211714	1.74347	0.806839	1.34257	1.1969	2.01781	2.50917	1.22824	1.10141
ENSBTAG00000031030	OR4C5	1	1	0	0	0.147745	0.0982067	0.677528	1.3861	0.479953	1.18495	8.43061	6.96106	0.913702	0.913223	0.120142	0.119661	0.227577	0.229511	0.167432	0.166951
ENSBTAG00000031119	OR4S1	0	1	0	0	0.0562683	0.012895	0.619199	1.49296	2.46945	1.94522	8.48189	8.22646	0.798989	0.844079	0.357604	1.14986	0.12014	0.152779	0.0527187	0.0978087
ENSBTAG00000031150	C11H2orf70	1	0	0	0	7.74526	7.50028	7.80592	7.73677	6.34506	7.90528	0.294677	1.30697	0.0861125	0.229135	3.93514	5.684	7.54916	7.41895	6.83588	6.19948
ENSBTAG00000031160	IGLL1	1	0	0	0	4.60106	3.28098	2.5123	3.04719	1.83987	3.83185	5.57156	5.5084	0.929168	1.67746	7.05306	6.77416	3.81158	5.35367	5.40541	6.06823
ENSBTAG00000031188	ADIG	1	1	0	0	5.0493	2.02879	15.1185	14.9427	3.71885	3.22175	4.39463	3.84283	8.58746	6.75911	5.05537	3.82433	4.45712	3.53561	2.33968	3.06424
ENSBTAG00000031194	PHLDA2	1	1	0	0	4.27121	5.13457	11.4812	10.615	7.59273	8.1364	0.9495	0.156481	7.92563	6.23745	5.83385	6.25914	3.25132	2.64561	5.26434	5.13854
ENSBTAG00000031235	IL5	0	1	0	0	1.36942	0.202177	0.314333	1.13975	6.9209	6.87301	0.686758	1.51898	0.489932	0.477797	0.936255	0.0814375	0.263382	1.04825	1.11709	0.171507
ENSBTAG00000031236	F1MDE9	1	1	0	0	1.50207	0.432215	0.795144	1.42187	0.224674	0.0567075	3.49056	1.48702	0.990955	0.822988	0.197394	0.0294275	0.338508	0.132527	2.15779	0.689582
ENSBTAG00000031247	MUC7	1	0	0	0	2.2106	0.505985	0.338199	0.0850462	2.46437	1.42645	0.707419	0.454266	0.908579	0.655426	2.704	0.691251	4.23634	3.95446	1.47162	0.328596
ENSBTAG00000031277	FOXL2	1	1	1	0	9.95242	9.21249	4.03468	1.21702	5.88764	5.55067	2.89093	1.1192	1.02717	0.743786	12.7278	12.3308	10.3891	10.0813	8.78009	7.28894
ENSBTAG00000031348	CCR9	1	0	0	0	4.34466	3.14892	3.2107	1.35819	3.04199	2.69664	5.22356	4.35168	2.83761	1.55051	4.37028	4.25424	1.29673	0.755949	4.2781	3.52684
ENSBTAG00000031351	SEC14L4	1	0	0	0	9.97279	9.84911	2.66499	4.83236	4.93705	5.04306	11.6898	11.8983	0.718013	2.56674	7.21409	7.41195	8.27539	8.36981	9.38784	8.95878
ENSBTAG00000031362	NXPE2	1	0	0	0	5.97793	8.55129	4.10862	2.70664	0.660724	1.8772	1.01486	1.81079	1.41578	2.19252	3.51867	1.72331	3.46475	3.9138	5.13628	7.46694
ENSBTAG00000031376	BSP30C	1	1	0	0	6.56908	6.70288	0.947166	0.22348	1.17359	1.91355	1.98794	3.31318	0.949802	2.34948	2.36305	4.56849	11.7162	11.9472	5.86171	2.69662
ENSBTAG00000031462	FAM209B	1	0	0	0	4.76623	1.81596	2.63617	3.20244	2.14297	2.02006	3.37285	1.47867	3.91127	3.06652	3.12191	2.27118	6.44997	5.08285	4.48119	5.02954
ENSBTAG00000031468	HIST3H2A	1	0	0	0	5.81357	5.3276	5.55053	4.45009	3.09556	1.94434	0.560024	0.424446	5.94928	3.70202	2.71379	5.12	6.24839	6.48168	3.41837	2.17205
ENSBTAG00000031497	FGFBP1	0	1	0	0	7.19462	8.98154	0.593626	1.29673	0.0820712	0.115479	0.647186	0.680594	0.848351	0.881759	0.0547912	0.0881987	0.159483	0.200209	5.91213	4.50624
ENSBTAG00000031573	ITGB1BP3	1	1	0	0	4.48711	6.2044	6.62042	4.00225	8.83417	8.8446	5.72794	6.87973	18.3876	18.022	6.49495	5.33193	7.54528	7.49883	5.21493	5.29347
ENSBTAG00000031582	TCEB2	1	0	1	0	0.784553	3.20819	1.14151	0.39526	2.31655	0.638545	0.692307	1.58661	0.506387	0.579455	1.85306	2.78328	2.10252	1.72704	0.161193	1.08518
ENSBTAG00000031593	CATHL1	1	1	0	0	0.038245	0.172492	0.286054	0.365864	0.0901587	0.169969	2.68133	3.34528	2.15203	1.35129	0.0628787	0.142689	1.22852	3.27806	0.110164	0.189974
ENSBTAG00000031599	CATHL3	1	0	0	0	0.0213317	0.111335	0.266329	0.31461	0.0704337	0.118715	1.68902	1.02131	0.836714	0.884995	0.0431538	0.091435	1.11895	2.98825	0.0904388	0.13872
ENSBTAG00000031618	WDR49	1	0	0	0	6.64005	6.45925	0.252352	0.07829	9.96166	9.95556	0.621568	0.447505	0.822733	0.64867	3.8977	3.12002	7.00687	6.87039	5.88795	3.01095
ENSBTAG00000031625	HRH3	1	0	0	0	4.47743	3.90646	0.803499	0.9515	12.5076	13.2283	0.407061	1.98616	1.6002	2.62033	3.25221	2.58896	6.527	6.8419	1.79312	4.23114
ENSBTAG00000031704	MGC133804	1	0	0	0	1.16542	0.0628817	0.29365	0.847128	7.99562	9.10411	0.64581	1.1631	0.54237	0.413419	2.05285	0.357959	1.99235	1.73167	3.38697	0.817489
ENSBTAG00000031717	H31	1	0	0	0	7.48307	7.39353	6.0126	4.75175	0.436659	0.257512	4.61842	4.50146	3.0284	2.83005	5.65653	7.23147	8.52336	7.20563	6.46349	3.26517
ENSBTAG00000031719	H4	1	0	0	0	2.66492	3.59487	1.61542	1.51395	1.66983	1.57709	4.80947	1.62189	0.537142	0.389968	2.04776	2.6252	2.02164	1.53308	1.16876	0.0851025
ENSBTAG00000031731	HIGD1D	1	0	0	0	0.02832	1.05397	3.21952	4.14794	2.0979	3.81553	3.11527	2.96937	6.66148	6.15767	4.68665	5.44706	4.68706	2.19526	2.36997	1.43857
ENSBTAG00000031756	H4	1	0	0	0	7.95288	8.51035	5.47706	4.96079	3.22694	5.26535	6.78569	7.19794	2.07643	1.17517	7.11178	7.25687	5.50017	6.71366	5.13342	5.43986
ENSBTAG00000031757	H2B	1	0	0	0	4.63578	6.83514	2.46916	2.75736	3.39075	4.39398	5.28523	6.49446	0.04981	1.13587	4.87254	5.43246	6.31962	6.71536	2.29607	2.46338
ENSBTAG00000031758	HIST1H2AG	1	0	0	0	1.74034	1.79637	0.0691875	1.0036	1.22681	1.34407	1.2546	3.92061	0.287398	0.47465	1.03427	1.12875	2.43459	3.01848	1.18504	1.2893
ENSBTAG00000031759	H31	1	0	0	0	0.49731	1.93695	0.123498	0.3026	0.717132	2.57128	0.889119	1.90921	0.693882	0.872985	3.92095	5.29185	7.55267	7.38953	3.29113	2.26119
ENSBTAG00000031760	H2B	1	1	0	0	6.794	5.22569	3.01526	3.14091	1.01189	0.173994	3.09332	5.55403	0.49703	0.529854	8.68147	9.11783	1.88441	1.60349	5.11658	5.12459
ENSBTAG00000031761	H31	1	0	0	0	1.53714	5.47753	1.12097	0.43431	1.16409	0.314985	2.72242	4.40814	1.80299	1.04046	5.80476	6.30045	5.66506	4.13277	1.45609	1.5114
ENSBTAG00000031762	H4	1	0	0	0	5.62301	4.50307	2.20956	2.40945	1.26433	3.1374	7.72104	7.96546	1.09854	1.03854	5.88332	4.77032	2.7775	1.09387	4.00294	4.26801
ENSBTAG00000031763	H4	1	0	0	0	1.21687	2.61485	2.94649	5.64793	2.21198	2.24509	5.44567	6.84008	2.27931	1.57661	3.49983	6.10024	5.36801	5.12913	3.71142	4.24337
ENSBTAG00000031768	E1BIL5	1	0	0	0	7.548	8.54974	6.08879	5.29781	1.50889	1.34449	7.13782	4.9309	3.53707	2.48221	5.56061	6.66968	7.19027	5.92817	6.82485	5.42387
ENSBTAG00000031771	HIST1H2AG	1	0	0	0	6.55966	7.12251	0.182439	3.50317	2.68949	3.92057	2.32385	2.46543	3.76468	3.29921	6.82765	7.19716	7.19296	7.58801	3.77168	4.03892
ENSBTAG00000031772	PRODH2	1	0	0	0	0.988108	0.252327	1.08718	3.7799	1.48202	2.85205	13.3103	13.4947	2.20222	1.20717	0.320131	1.85899	2.7104	2.60314	1.05539	1.36995
ENSBTAG00000031773	HIST1H3A	1	0	0	0	7.22079	8.15351	5.48543	6.62691	2.05224	1.03112	4.7055	2.39775	3.53481	2.24222	7.81872	8.13807	7.43035	7.49432	6.7439	5.23333
ENSBTAG00000031780	HIST3H2BB	1	1	0	0	3.30889	0.680012	0.173071	0.956091	1.23883	1.15263	1.34441	0.476401	1.92376	1.88303	4.89846	4.85212	0.514525	2.20093	7.15519	6.6363
ENSBTAG00000031825	C19orf12	1	0	0	0	8.3026	7.45259	7.79524	7.39064	3.62588	2.14317	7.78363	7.39121	6.56845	5.67634	7.2536	5.60362	5.39573	2.85294	7.15917	6.27885
ENSBTAG00000031888	HIST1H2AJ	0	1	0	0	0.0704283	0.020655	1.64817	0.680552	1.33999	0.448688	0.65311	0.612723	0.854275	0.813887	5.91586	6.98109	0.158253	0.142323	1.73622	1.66329
ENSBTAG00000031889	H2B	1	0	0	0	4.23965	4.14768	2.73227	1.79523	0.244862	2.22667	5.31135	5.15788	2.54826	0.984006	5.41866	6.54076	2.84043	4.55636	1.09551	1.28117
ENSBTAG00000031895	TFB1M	0	0	1	0	2.77269	2.79833	2.52149	2.51291	2.66379	2.71054	2.3293	2.32115	2.69374	2.78015	2.56323	2.61507	2.39086	2.47102	2.84571	2.8011
ENSBTAG00000031955	GPR26	0	1	0	0	0.0512933	0.138367	0.261462	0.335836	10.0052	10.2281	0.630683	0.705056	0.831847	0.906221	0.521688	1.62163	8.08066	8.11581	1.46704	1.6429
ENSBTAG00000031965	TRGV11	1	0	0	0	8.82427	8.44646	8.45596	8.88392	0.996361	1.21032	9.55918	9.91306	3.13444	5.60252	8.33676	8.82677	3.23778	5.83645	8.8048	8.29217
ENSBTAG00000032003	ZCCHC13	1	0	0	0	4.04075	3.90276	8.01568	8.04209	7.80979	7.99243	5.50002	7.13354	3.82421	6.1619	4.12313	3.99155	1.35844	2.1479	3.53521	2.99779
ENSBTAG00000032014	MGC140080	1	0	0	0	0.081405	0.03488	5.39106	3.39547	1.3073	3.85113	0.657614	0.624167	3.10862	3.09622	0.939728	0.311922	1.2776	0.456297	1.21808	1.19967
ENSBTAG00000032018	ZNF19	0	0	1	0	1.46915	1.55814	0.907101	1.06979	0.665921	0.780815	0.487125	0.695379	0.790286	1.09902	1.12293	1.15846	1.08665	1.17243	1.30303	1.33314
ENSBTAG00000032059	TGM5	0	1	0	0	2.33553	2.48406	8.89354	9.67123	2.64681	1.51674	6.41254	6.67233	1.12644	0.772441	1.2381	2.08106	3.29945	2.43071	1.28362	2.12903
ENSBTAG00000032093	SPINK4	1	0	0	0	4.06799	3.02397	3.07873	5.28253	0.895915	2.85156	1.41176	3.26289	2.64938	2.75762	1.73668	2.01365	0.19967	0.383377	3.38139	3.62453
ENSBTAG00000032151	CCDC73	0	0	0	1	7.9677	6.32797	3.99145	4.13619	5.11784	5.09102	1.83813	0.548861	3.48736	3.9077	5.00017	4.53965	4.8254	3.67811	6.91805	7.22817
ENSBTAG00000032193	REG4	1	1	0	0	3.78071	0.821885	1.27705	1.17302	8.69445	8.79919	1.96243	1.77726	2.30516	2.89372	9.32475	7.98052	0.221755	0.886604	2.37759	0.397861
ENSBTAG00000032206	HEMGN	1	0	0	0	6.06323	5.51743	6.34885	6.60604	2.75314	3.11029	2.93163	3.22395	4.63636	4.76522	4.40856	2.34202	2.41654	0.144404	5.96857	5.28503
ENSBTAG00000032209	CXHXorf65	1	0	0	0	2.03257	3.21011	5.12108	4.00531	0.0628125	1.3295	3.73831	5.56812	1.0595	2.81502	3.86406	3.25171	1.41161	1.3962	1.80041	3.69308
ENSBTAG00000032236	CA1	1	0	0	0	3.52885	4.02725	0.75656	0.0263838	2.61545	3.25974	0.34451	0.145324	0.545675	0.346489	1.94752	1.40398	1.23261	0.0766587	4.46601	1.09517
ENSBTAG00000032279	IQCF2	1	0	0	0	3.13913	0.826725	0.224159	0.062605	4.00191	4.52254	0.593374	0.43182	0.794539	0.632985	1.46823	1.21051	5.00892	2.54203	1.49416	1.33261
ENSBTAG00000032301	SLC26A7	1	0	0	0	3.75628	1.44322	1.80248	2.21814	1.58535	1.22606	2.68029	2.74335	2.48752	2.64473	0.65635	0.573477	1.45888	1.47654	3.69814	2.74234
ENSBTAG00000032350	E1BJK3	1	1	0	0	3.7533	3.7999	3.89138	7.14561	2.17005	2.28289	16.9062	17.0628	6.47302	4.89176	4.06961	5.90386	5.12667	3.16813	6.13339	6.26357
ENSBTAG00000032424	FSHR	0	1	0	0	1.88016	0.842643	4.60632	4.64107	2.1195	1.05223	0.882188	1.4512	1.36271	2.47641	12.3106	12.1993	2.28908	1.32978	3.09507	2.15848
ENSBTAG00000032451	H2B	1	0	0	0	4.14558	4.09968	0.0369712	0.863244	0.255541	1.96113	4.75001	3.94878	1.39918	0.716392	4.89589	5.80982	2.38273	3.83959	2.39534	1.57466
ENSBTAG00000032458	H32	1	0	0	0	0.113798	0.112968	1.10047	2.87778	0.548735	1.57111	9.01185	8.65251	3.24348	1.6775	5.21737	5.32015	3.44662	5.00566	1.5981	0.643197
ENSBTAG00000032485	LHFPL1	1	1	0	0	5.73967	2.77257	5.23491	2.29569	2.49433	1.37007	0.457176	0.115031	4.11138	4.50077	6.91496	5.09203	6.69868	5.92739	9.34203	9.37521
ENSBTAG00000032538	TPRG1	1	0	0	0	5.66645	5.61754	6.62328	7.62772	1.20969	0.42969	7.38849	8.04681	8.03485	8.09962	3.43289	1.98949	0.0571633	0.123915	3.57858	5.64762
ENSBTAG00000032567	C1QL4	1	1	0	0	0.0845083	0.196705	0.311557	0.40825	6.88725	8.68846	0.680773	0.777465	0.881938	0.97863	0.0883775	0.18507	0.184633	0.290955	0.135667	0.23236
ENSBTAG00000032623	KCNG3	1	0	0	0	7.66137	7.98029	1.89039	4.21414	6.51004	6.9151	0.068895	0.247701	1.00449	2.74146	9.1662	9.56606	10.4076	10.4037	6.85114	6.05688
ENSBTAG00000032642	GSTA3	1	0	0	0	8.22949	8.32687	7.28728	8.04691	3.8721	4.0164	9.91706	10.2047	1.76458	0.174441	9.5094	10.0973	7.59714	6.85134	7.5617	6.67042
ENSBTAG00000032655	ZNF485	1	0	0	0	0.0547983	0.384832	0.269257	0.606321	2.30353	3.61865	0.638478	0.975542	0.839643	1.17671	0.827202	2.82148	1.07284	3.242	0.910523	2.98124
ENSBTAG00000032656	CPN2	1	0	0	0	4.04304	2.74559	8.33875	9.33831	2.74729	2.61786	14.781	14.604	4.5858	2.65271	6.32479	7.21911	3.45069	1.58026	4.80763	4.53346
ENSBTAG00000032687	CST9L	1	1	0	0	0.543277	1.56681	2.2436	0.980251	0.0795312	0.153849	0.962351	1.71071	2.22789	2.34171	9.96204	8.55856	0.141255	0.249099	4.92993	7.67378
ENSBTAG00000032709	CMTM5	1	0	0	0	8.28221	7.06218	5.02888	2.09983	14.753	14.7466	1.09143	0.912347	7.09927	6.59319	7.0208	6.38596	6.48999	6.37614	8.61776	7.34483
ENSBTAG00000032733	RIIAD1	1	0	0	0	9.19024	8.96008	5.74712	6.14082	6.85109	7.36056	5.72901	4.8854	1.40204	4.16729	7.6414	7.58622	9.75421	9.80461	8.54313	7.59794
ENSBTAG00000032738	AARD	1	0	0	0	7.27659	4.8193	0.699226	1.38064	3.08699	5.12796	4.63695	5.3659	2.13701	2.29189	8.77968	8.84213	7.94801	8.44374	9.38955	9.9893
ENSBTAG00000032774	C28H10orf116	0	1	0	0	3.90855	3.66339	9.79868	9.8609	4.61006	4.53338	1.07146	0.877207	4.99911	4.81069	4.37645	3.92495	3.99431	3.69899	4.21896	4.84107
ENSBTAG00000032819	MUC20	1	0	0	0	9.78597	9.15689	4.24347	5.24585	1.73325	1.40253	11.4232	10.9976	5.32254	4.96687	8.71672	7.91988	8.75299	8.47517	7.105	3.92765
ENSBTAG00000032846	MGC152346	1	0	0	0	11.6927	11.6428	0.268618	2.0569	10.9418	10.9147	10.9709	10.653	1.04835	0.189603	7.08483	5.79043	10.7296	10.517	10.474	8.54837
ENSBTAG00000032858	DYDC1	1	0	0	0	5.5111	8.94445	1.71531	3.9874	8.0964	8.54659	6.21408	7.11127	0.740885	0.431028	9.0091	9.42045	9.62054	10.4344	3.6366	6.59873
ENSBTAG00000032873	F1MSQ0	1	0	0	0	0.586507	1.87541	1.88497	2.31636	0.070835	0.307208	2.20938	2.39134	0.837115	1.07349	0.42018	1.45559	1.00152	2.90009	0.524335	1.6804
ENSBTAG00000032875	BEX2	1	1	0	0	5.20126	3.5292	2.97367	0.0357175	13.1694	12.9959	1.65204	3.39414	6.23533	5.33012	10.8179	10.8977	14.5068	14.5317	5.28357	4.10128
ENSBTAG00000032887	SUPT3H	0	0	1	0	2.24331	1.50109	2.3367	2.17561	2.24272	2.09995	1.01276	0.926824	1.13073	0.937315	3.1169	2.85271	1.29892	1.28124	2.72714	2.46971
ENSBTAG00000032902	SLC11A2	0	1	0	0	7.62689	8.98125	2.64321	2.28625	1.38081	1.34839	2.583	2.5578	1.67721	1.79042	2.40377	2.33092	1.63182	1.74515	5.89464	5.00482
ENSBTAG00000032908	C10H14orf176	1	0	0	0	4.10303	5.37276	7.2795	7.33049	3.0428	2.35201	6.53536	7.02334	1.52267	1.62228	5.32038	5.61097	4.51096	5.7182	0.18242	2.38277
ENSBTAG00000032918	SCGB1A1	1	0	0	0	1.58373	0.333462	1.69132	5.78417	2.79428	2.0231	5.27759	6.30415	2.50262	3.28928	7.58995	7.69934	5.735	2.61852	3.70711	4.93176
ENSBTAG00000032962	SKOR2	1	1	0	0	0.363657	0.900183	0.296857	0.213643	4.89304	5.26745	0.666077	0.582863	0.867243	0.784028	3.74407	1.84089	1.12035	0.373463	0.120967	0.0377525
ENSBTAG00000032983	FOXB2	1	0	1	0	0.10421	0.31231	0.330101	0.516513	4.25997	7.96517	0.699316	0.885728	1.92207	1.41416	3.0109	2.12467	0.205293	0.389928	0.872996	2.58437
ENSBTAG00000033008	MYOZ1	0	1	0	0	2.65763	2.58719	1.90315	1.65976	0.467141	1.07556	2.4258	2.55499	12.0564	12.0166	2.89536	2.68049	2.32735	2.42012	2.88438	2.75609
ENSBTAG00000033096	PAG2	1	1	0	0	0.284413	1.29772	6.89206	7.4862	0.502715	1.98766	0.47864	0.713583	6.60538	8.20158	0.13653	0.902463	1.38492	0.593912	1.69374	2.72622
ENSBTAG00000033128	CRH	1	1	0	0	0.427748	1.50895	0.525317	1.30315	10.295	11.7297	0.592328	0.729004	1.1112	1.92192	4.21142	3.45873	0.103033	0.240599	0.0472225	0.183899
ENSBTAG00000033153	GRIK2	0	0	0	1	6.20261	5.51376	5.53562	5.63919	11.204	11.2238	1.25655	1.26364	2.40571	2.54987	7.03951	7.42765	10.303	10.6167	5.55789	5.44298
[truncated: 457 more rows]
